# Supplementary material
Source: PubMed Central journal article supplement (PMC5266429)
Supplement: ja6b09244_si_001.pdf [file ja6b09244_si_001.pdf]

# Brønsted Acid Catalysis – Structural Preferences and Mobility in Imine/Phosphoric Acid Complexes

Julian Greindl, Johnny Hioe, Nils Sorgenfrei, Fabio Morana and Ruth M. Gschwind\*

## Supporting Information

|                                                                                      |    |
|--------------------------------------------------------------------------------------|----|
| Experimental data .....                                                              | 2  |
| Synthesis of Ketimines.....                                                          | 3  |
| (E)-1-(4-methylphenyl)-N-phenylethan-1-imine <b>[2a]</b> .....                       | 3  |
| (E)-1-(4-methoxyphenyl)-N-phenylethan-1-imine (98% 15N) <b>[2b]</b> .....            | 4  |
| (E)-N-phenyl-1-(4-(trifluoromethyl)phenyl)ethan-1-imine (98% 15N) <b>[2c]</b> .....  | 5  |
| (E)-N-(4-methoxyphenyl)-1-(4-(trifluoromethyl)phenyl)ethan-1-imine <b>[3a]</b> ..... | 6  |
| Sample preparation.....                                                              | 7  |
| Preparation of binary complexes in CD <sub>2</sub> Cl <sub>2</sub> .....             | 7  |
| Preparation of binary complexes in freonic solvent mixtures.....                     | 7  |
| Solvent screening.....                                                               | 8  |
| Identification of the <i>E</i> - and <i>Z</i> -imines inside the complex .....       | 9  |
| Assignment of the <sup>1</sup> H and <sup>13</sup> C chemical shifts.....            | 10 |
| Complex 2a/1c.....                                                                   | 10 |
| Complex 2b/1c.....                                                                   | 11 |
| Complex 2c/1c.....                                                                   | 12 |
| Complex 3a/1c.....                                                                   | 13 |
| Low temperature measurements in the freonic solvent mixture .....                    | 15 |
| Structure identification of all <i>E</i> -imine/TRIP complexes.....                  | 16 |
| <i>E</i> -2a/1c complex .....                                                        | 16 |
| <i>E</i> -2b/1c complex .....                                                        | 17 |
| <i>E</i> -2c/1c complex .....                                                        | 17 |
| <i>E</i> -3a/1c complex.....                                                         | 18 |
| Structure identification of all <i>Z</i> -imine/TRIP complexes.....                  | 21 |
| <i>Z</i> -2a/1c complex .....                                                        | 21 |
| <i>Z</i> -2b/1c complex .....                                                        | 21 |
| <i>Z</i> -2c/1c complex .....                                                        | 21 |
| <i>Z</i> -3a/1c complex .....                                                        | 22 |
| Chemical shift analysis of the 2a/1c complexes.....                                  | 23 |
| Spectrometer data.....                                                               | 24 |
| Pulse programs.....                                                                  | 24 |
| Acquisition Parameters.....                                                          | 24 |
| Data of the theoretical calculations .....                                           | 25 |

## Experimental data

Deuterated solvents were purchased from Deutero or Sigma Aldrich. Where dry solvents were essential,  $\text{CD}_2\text{Cl}_2$  was freshly distilled over  $\text{CaH}_2$  and Toluene- $d_8$  was refluxed over  $\text{Na}$ /Benzophenone under Argon atmosphere. Freon mixtures were prepared from  $\text{CDCl}_3$  and  $\text{SbCl}_5/\text{SbF}_3$  according to literature procedures and stored in small lecture bottles.<sup>[1,2]</sup> The catalysts were purchased from Sigma Aldrich or synthesized from the bisphenols according to the procedure of Klusmann et al.<sup>[3]</sup>

High resolution mass spectra were measured by the central analytics division in the Institute of Organic Chemistry. Gas chromatography coupled with a mass selective detector was performed on an Agilent 6890N Network GC-System.

## Synthesis of Ketimines

Imines were synthesized by refluxing aniline and the corresponding ketone over activated molecular sieves 4 Å in toluene. The toluene was used either in p.A. quality or was dried by refluxing over sodium.

### (*E*)-1-(4-methylphenyl)-*N*-phenylethan-1-imine [**2a**]

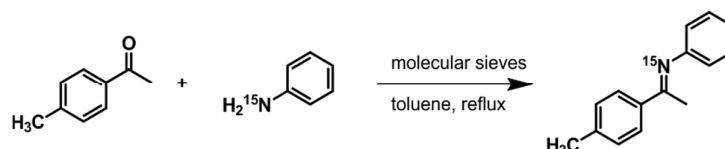

Molecular sieves 4 Å (1.6 g) were weighed in to a 25 ml Schlenk flask equipped with a reflux condenser. The setup dried at 350°C under reduced pressure. 4-Methylacetophenone (0.403 g, 3.00 mmol, 0.40 ml) and Aniline (98%  $^{15}\text{N}$ , 0.30 ml, 0.310 g, 3.30 mmol) were dissolved in 5 ml anhydrous Toluene under argon atmosphere. A drying tube filled with  $\text{CaCl}_2$  was added to the setup and the solution was refluxed for 20 h. After cooling down to r.t., the yellow solution was filtered and the solvent was removed under reduced pressure. The obtained yellow solid was recrystallized in methanol and yielded as a yellow solid (0.123 g, 0.58 mmol, 20 %) predominantly as *E*-Isomer (>99 % via  $^1\text{H-NMR}$  analysis).

$^1\text{H-NMR}$  (400.1 MHz,  $\text{CD}_2\text{Cl}_2$ )  $\delta_{\text{H}}$  = 7.86 (m, 2H), 7.34 (m, 2H), 7.25 (m, 2H), 7.06 (m, 1H), 6.76 (m, 2H), 2.40 (s, 3H) 2.18 ppm (d,  $^3J_{\text{HN}}$  = 1.76 Hz, 3H)

$^{13}\text{C-NMR}$  { $^1\text{H}$ } (100.6 MHz):  $\delta_{\text{C}}$  = 165.3 (d,  $^1J_{\text{NC}}$  = 7.0 Hz), 152.4 (d,  $^1J_{\text{NC}}$  = 1.6 Hz), 137.3 ( $^2J_{\text{NC}}$  = 8.3 Hz), 129.34, 129.29 (d,  $^3J_{\text{NC}}$  = 3.2 Hz), 127.5 ( $J_{\text{NC}}$  = 3.2), 123.3, 123.9, 119.7 ( $^2J_{\text{NC}}$  = 2.3 Hz), 21.5, 17.4 ppm (d,  $^2J_{\text{NC}}$  = 2.8 Hz)

$^{15}\text{N-NMR}$  (40.5 MHz):  $\delta_{\text{N}}$  = 328.9 ppm

**HR-MS** (ESI,  $m/z$ ): found 211.1248 (M+H)<sup>+</sup> (calculated for 211.1248 for  $\text{C}_{15}\text{H}_{16}[^{15}\text{N}]\text{O}$ ); Diff(ppm) = -0.37

(E)-1-(4-methoxyphenyl)-N-phenylethan-1-imine (98%  $^{15}\text{N}$ ) [2b]

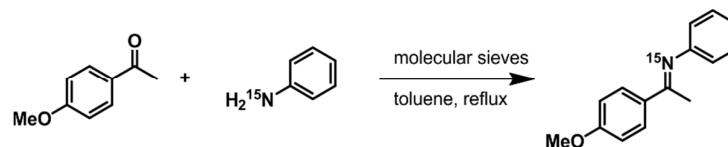

Molecular sieves 4 Å (1.6 g) were weighed in to a 25 ml Schlenk flask equipped with a reflux condenser. The setup dried at 350°C under reduced pressure. 4-Methoxyacetophenone (0.450 g, 3.00 mmol) and Aniline (98%  $^{15}\text{N}$ , 0.30 ml, 0.310 g, 3.30 mmol) were dissolved in 5 ml anhydrous Toluene under argon atmosphere. A drying tube filled with  $\text{CaCl}_2$  was added to the setup and the solution was refluxed for 20 h. After cooling down to r.t., the yellow solution was filtered and the solvent was removed under reduced pressure. The obtained yellow solid was recrystallized in methanol and yielded as a yellow solid (0.223 g, 0.986 mmol, 33 %) predominantly as E-Isomer (>99 % via  $^1\text{H-NMR}$  analysis).

$^1\text{H-NMR}$  (400.1 MHz,  $\text{CD}_2\text{Cl}_2$ ):  $\delta_{\text{H}}$  = 7.95 (m, 2H), 7.35 (m, 2H), 7.07 (m, 1H), 6.96 (m, 2H), 6.77 (m, 2H), 2.18 ppm (d,  $^3J_{\text{HN}}$  = 1.76 Hz)

$^{13}\text{C-NMR}$  { $^1\text{H}$ } (100.6 MHz,  $\text{CD}_2\text{Cl}_2$ ):  $\delta_{\text{C}}$  = 164.5 (d,  $^1J_{\text{NC}}$  = 7.1 Hz), 161.9, 152.5 (d,  $^2J_{\text{NC}}$  = 1.7 Hz), 132.5 (d,  $^1J_{\text{NC}}$  = 8.4 Hz), 129.2, 129.1 (d,  $^3J_{\text{NC}}$  = 3.3 Hz), 123.2, 119.8 (d,  $^2J_{\text{NC}}$  = 2.3 Hz), 113.8, 55.7, 17.2 ppm (d,  $^2J_{\text{NC}}$  = 2.7 Hz)

$^{15}\text{N-NMR}$  (40.5 MHz,  $\text{CD}_2\text{Cl}_2$ ):  $\delta_{\text{N}}$  = 325.5 ppm

**HR-MS (ESI,  $m/z$ ):** found 227.1198 (M+H)<sup>+</sup> (calculated 227.1197 for  $\text{C}_{15}\text{H}_{16}[^{15}\text{N}]\text{O}$ ); Diff(ppm) = 0.49

(E)-N-phenyl-1-(4-(trifluoromethyl)phenyl)ethan-1-imine (98% <sup>15</sup>N) [2c]

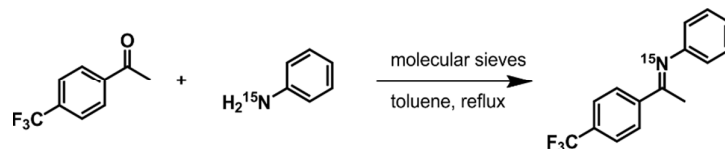

Molecular sieves 4 Å (1.6 g) were weighed in to a 25 ml Schlenk flask equipped with a reflux condenser. The setup dried at 350°C under reduced pressure. 4-Trifluoromethylacetophenone (0.376 g, 2.00 mmol) and Aniline (98% <sup>15</sup>N, 0.20 ml, 0.207 g, 2.20 mmol) were dissolved in 5 ml anhydrous Toluene under argon atmosphere. A drying tube filled with CaCl<sub>2</sub> was added to the setup and the solution was refluxed for 20 h. After cooling down to r.t., the yellow solution was filtered and the solvent was removed under reduced pressure. The obtained yellow solid was recrystallized in methanol and yielded as a yellow solid (0.340 g, 1.29 mmol, 64 %) predominantly as E-Isomer (>99 % via <sup>1</sup>H-NMR analysis).

**<sup>1</sup>H-NMR** (400.1 MHz, CD<sub>2</sub>Cl<sub>2</sub>): δ<sub>H</sub> = 8.11 (m, 2H), 7.73 (m, 2H), 7.38 (m, 2H), 7.12 (m, 1H), 6.80 (m, 2H), 2.25 ppm (d, <sup>3</sup>J<sub>NH</sub> = 1.8 Hz, 3H)

**<sup>13</sup>C-NMR {<sup>1</sup>H}** (100.6 MHz): δ<sub>C</sub> = 164.5 (d, <sup>1</sup>J<sub>NC</sub> = 7.1 Hz), 151.7 (d, <sup>1</sup>J<sub>NC</sub> = 1.5 Hz), 143.2 (<sup>2</sup>J<sub>NC</sub> = 7.3 Hz), 132.1 (q, <sup>2</sup>J<sub>FC</sub> = 32.4 Hz) 129.4, 128.0 (d, <sup>3</sup>J<sub>NC</sub> = 3.2 Hz), 125.6 (q, <sup>4</sup>J<sub>FC</sub> = 3.8 Hz), 124.6 (q, <sup>1</sup>J<sub>FC</sub> = 272.0 Hz), 123.9, 119.5 (<sup>2</sup>J<sub>NC</sub> = 2.3 Hz), 17.5 ppm (d, <sup>2</sup>J<sub>NC</sub> = 2.8 Hz)

**<sup>19</sup>F-NMR {<sup>1</sup>H}** (376 MHz, CD<sub>2</sub>Cl<sub>2</sub>): δ<sub>F</sub> = - 63.1 ppm

**<sup>15</sup>N-NMR** (60.8 MHz, CD<sub>2</sub>Cl<sub>2</sub>, 300 K): δ<sub>N</sub> = 338.2 ppm

**GC-MS** (EI, 70 EV): *m/z* (RT) = 264.1 [M<sup>+</sup>] (8.794 min)

**HR-MS** (ESI, *m/z*): found 265.097 (M+H)<sup>+</sup> (calculated 265.0965 for C<sub>15</sub>H<sub>13</sub>F<sub>3</sub>[<sup>15</sup>N]); Diff(ppm) = 1.89

(E)-N-(4-methoxyphenyl)-1-(4-(trifluoromethyl)phenyl)ethan-1-imine [**3a**]

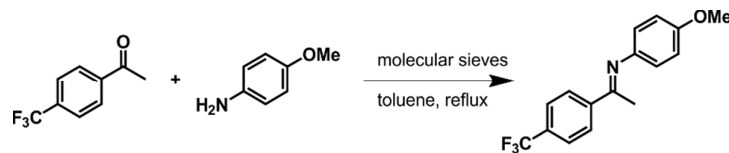

Molecular sieves 4 Å (1.6 g) were weighed in to a 25 ml Schlenk flask equipped with a reflux condenser. The setup dried at 350°C under reduced pressure. 4-Trifluoromethylacetophenone (0.565 g, 3.00 mmol) and Anisidine (0.406 g, 3.30 mmol) were dissolved in 5 ml anhydrous Toluene under argon atmosphere. A drying tube filled with CaCl<sub>2</sub> was added to the setup and the solution was refluxed for 20 h. After cooling down to r.t., the yellow solution was filtered and the solvent was removed under reduced pressure. The obtained yellow solid was recrystallized in methanol and yielded as a yellow solid (0.612 g, 2.09 mmol, 70 %) predominantly as E-Isomer (>99 % via <sup>1</sup>H-NMR analysis).

<sup>1</sup>H-NMR (400.1 MHz, CDCl<sub>3</sub>): δ<sub>H</sub> = 8.00 (d, <sup>3</sup>J<sub>HH</sub> = 8.2 Hz, 2H), 7.63 (d, <sup>3</sup>J<sub>HH</sub> = 8.2 Hz, 2H), 6.86 (d, <sup>3</sup>J<sub>HH</sub> = 8.2 Hz, 2H), 6.70 (d, <sup>3</sup>J<sub>HH</sub> = 8.1 Hz, 2H), 3.76 (s, 3H), 2.22 ppm (s, 3H)

<sup>13</sup>C-NMR {<sup>1</sup>H} (100.6 MHz): δ<sub>C</sub> = 127.5, 125.3, 120.8, 114.3, 55.5, 17.4 ppm

## Sample preparation

### Preparation of binary complexes in CD<sub>2</sub>Cl<sub>2</sub>

Catalyst **1c** was dried for 30 min at 150°C under reduced pressure. Ketimine and **1c** were directly weighed into a 5 mm NMR tube under an inert argon atmosphere. CD<sub>2</sub>Cl<sub>2</sub> (0.6 ml) and 1.0 ml of tetramethylsilane atmosphere were added to the tube. The sample was stored in an -80°C freezer. A 1:1 ratio of catalyst/ketimine was used for all samples. A concentration 50 mmol/L was used for samples **2a/1c** and **2b/1c**. For samples **2c/1c** and **3a/1c** a concentration of 25 mmol/L was used, due to the limited solubility at low temperatures.

### Preparation of binary complexes in freonic solvent mixtures

Catalyst **1c** was dried for 30 min at 150°C under reduced pressure. Ketimine and **1c** were directly weighed into a heavy wall NMR tube equipped with a J. Young valve under an inert argon atmosphere. 1.0 ml of tetramethylsilane atmosphere were added and the sample was connected to a vacuum line. The NMR tube was evacuated and cooled down to 77 K. The freonic solvent mixture was condensed through column filled with P<sub>2</sub>O<sub>5</sub> and KOH into the NMR-tube.

## Solvent screening

Toluene, dichloromethane, and a freonic solvent mixture of  $\text{CDF}_2\text{Cl}$  and  $\text{CDFCl}_2$  were chosen as solvents, because of their low melting points (toluene: 178 K,  $\text{CD}_2\text{Cl}_2$ : 176.5 K,  $\text{CDF}_2\text{Cl}/\text{CDFCl}_2$ : <110 K). Vastly superior linewidths and signal dispersion was observed in  $\text{CD}_2\text{Cl}_2$  and the freonic solvent mixture (see figure 1). The investigated reaction is reported to work in toluene, as well as dichloromethane, with toluene having superior yields.<sup>[4,5]</sup>

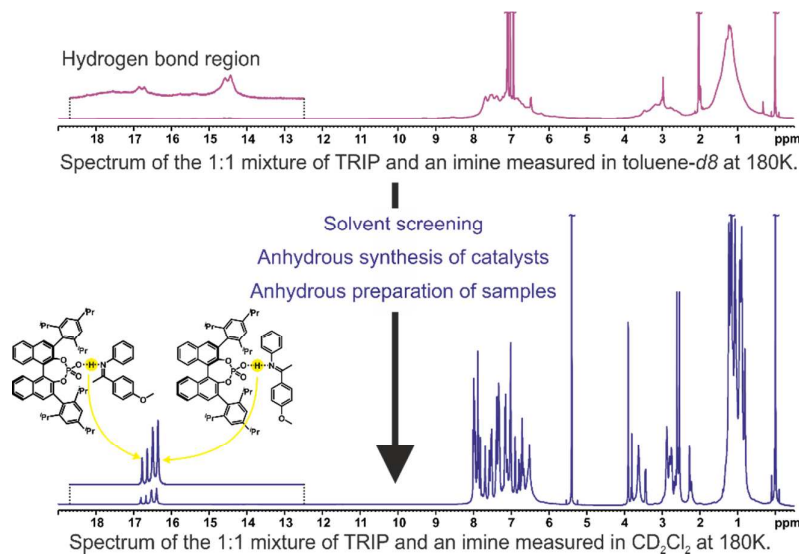

Figure S1: Comparison of  $^1\text{H}$  spectra of an imine/catalyst complex at 180 K

The observed signal pattern in the freonic solvent mixture is similar to that observed in dichloromethane. Dichloromethane was used as a solvent for most NMR investigations, due to its better solubility.



## Identification of the *E*- and *Z*-imines inside the complex

To identify the *E*- and the *Z*-imine inside the complex, standard 2D  $^1\text{H}, ^1\text{H}$ -NOESY experiments were performed at 180 K.

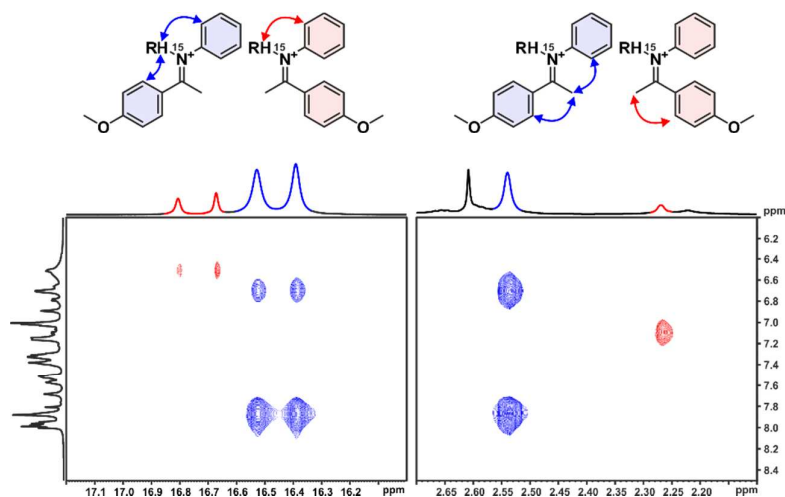

Figure S2: Details of the 2D  $^1\text{H}, ^1\text{H}$ -NOESY spectrum at 180 K *in dichloromethane*, that was used to identify the *E*- and the *Z*-imine inside the imine/catalyst complex. The same pattern was found for every investigated imine.

For the *Z*-imine, the proton inside the hydrogen bond shows only one strong NOE to the aniline part of the imine, whereas for the *E*-imine, an NOE to the aniline part of the imine, as well as an NOE to the acetophenone part of the imine can be found. The methyl group of the *Z*-imine shows only one strong NOE to the acetophenone part of the imine, whereas for the *E*-imine, NOEs to the aniline part and the acetophenone part can be observed (see figure 2). For every investigated imine, the same NOE pattern can be observed.











## Low temperature measurements in the freonic solvent mixture

The NOE pattern for the investigated Z-imine/**1c** complexes showed that a fast exchange on the NMR time scale between two structures takes place, even at 180 K. Therefore we carried out measurements at as low as 130 K, in order to reach the slow exchange regime. For these measurements a freonic solvent mixture of CDF<sub>2</sub>Cl and CDFCl<sub>2</sub> was used.

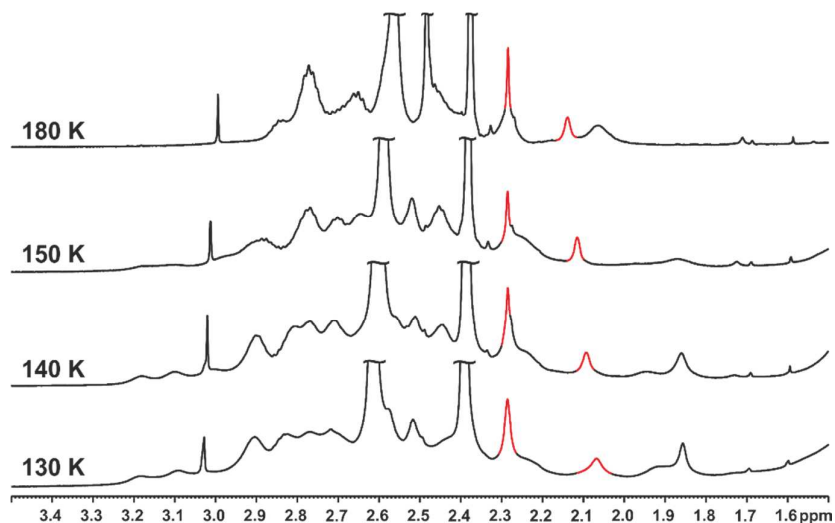

Figure S3: <sup>1</sup>H spectra of the **2a**/TRIP complex in a mixture of CDFCl<sub>2</sub> and CDF<sub>2</sub>Cl at different temperatures. The signals labeled in red arise from the 4-methyl group and the methyl group of the imine. Compared to the other signal, no substantial line broadening was observed, even at 130 K.

By lowering the temperature, natural line broadening occurs. Even at 130 K, no substantial line broadening was observed for the Z-imine, when compared to the other signals.

## Structure identification of all *E*-imine/TRIP complexes.

Selective  $^1\text{H}$  NOESY spectra were used to identify the structures of complexes **E-2a-b/1c** in solution. For **E-2c/1c** and **E-3a/1c**,  $^1\text{H},^{19}\text{F}$  HOESY spectra was used. The spectra were measured in  $\text{CD}_2\text{Cl}_2$  at 180 K. In every investigated complex, the same orientations of the imine were observed. One orientation (**TYPE I E**) was identified by the NOE pattern between the varying functional groups on the ketone part of the imines and parts of the BINOL backbone of **1c**. In the complexes **E-2a-b/1c**, the functional groups, as well as signals of the BINOL backbone were excited in selective  $^1\text{H}$  NOESY spectra. The other orientation (**TYPE II E**) was identified by 2D  $^1\text{H},^1\text{H}$  NOESY spectra with a mixing time of 300 ms for imines **2a-c** and with selective 1D  $^1\text{H},^1\text{H}$  NOESY spectra for imines **3a,b**. The methoxy group of the anisidine moiety of the imines was selectively excited in this case. In every investigated sample an exchange between the *E*-isomer of the imine substrate inside the imine/**1c** complex and the free imine in solution was observed at 180 K. This chemical exchange leads to a variety of exchange peaks between the observed forms of the imine in the selective NOESY spectra. Additional signals are produced by spin diffusion effects inside the extended aromatic system. The exchange peaks and spin diffusion effects can be reduced by shortening the mixing time of the NOESY experiments, which also leads to a tremendous loss of signal intensity.

Additional 1D selective NOESY spectra were measured by exciting the  $^1\text{H}$  signals of the BINOL backbone of the catalyst. Due to the large signal overlap in the aromatic region, these signals could not be excited selectively and therefore produced ambiguous NOEs. Nevertheless, these NOEs are in full agreement with the identified structure.

### **E-2a/1c** complex

Structure of **TYPE I E**

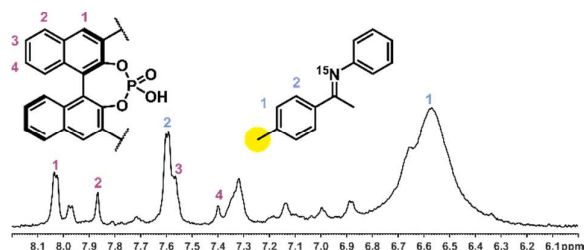

Selective NOESY spectrum of complex **E-2a/1c**. The excited methyl group of imine **2a** is labeled yellow. Additional signals are observed, due to chemical exchange and spin diffusion effects.

Structure of **TYPE II E**

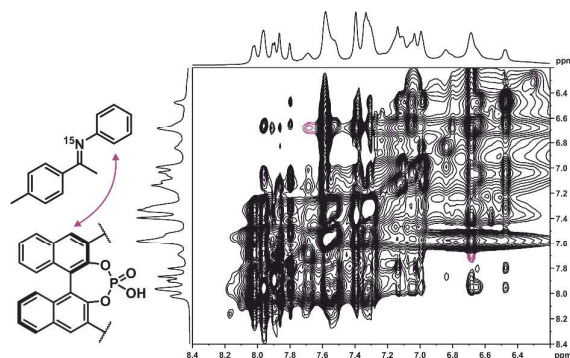



2D  $^1\text{H}, ^1\text{H}$  NOESY spectrum of complex **E-2a/1c**. The NOE that reveals structure **TYPE II E** is labeled in purple.

## E-2b/1c complex

Structure of **TYPE I E**

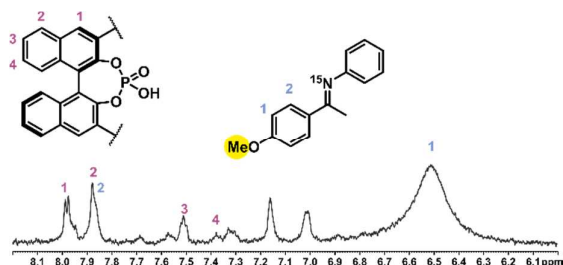

Selective NOESY spectrum of complex **E-2b/1c**. The excited methoxy group of imine **2b** is labeled yellow. Additional signals are observed, due to chemical exchange and spin diffusion effects.

Structure of **TYPE II E**

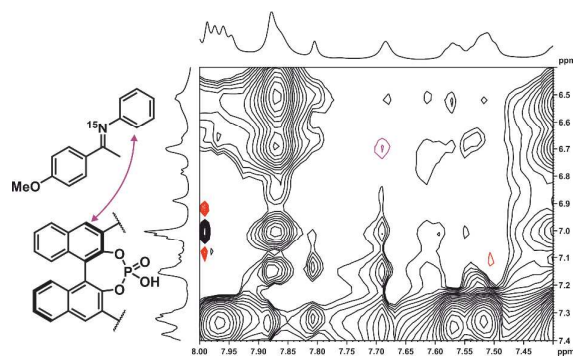

2D  $^1\text{H}, ^1\text{H}$  NOESY spectrum of complex **E-2b/1c**. The NOE that reveals structure **TYPE II E** is labeled in purple.

## E-2c/1c complex

Structure of **TYPE I E**

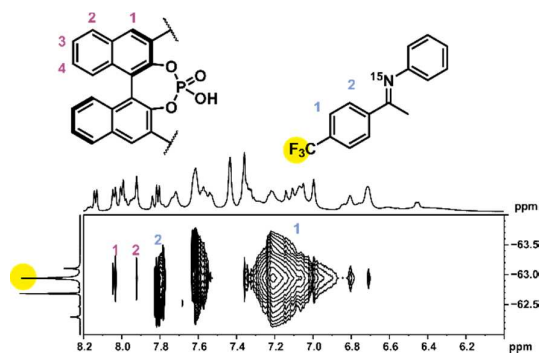

$^1\text{H}, ^{19}\text{F}$  HOESY spectrum of complex **E-2c/1c**. The trifluoromethyl group of **E-2c** inside the complex is labeled yellow. Additional signals are observed, due to chemical exchange and spin diffusion effects.

### Structure of *TYPE II E*

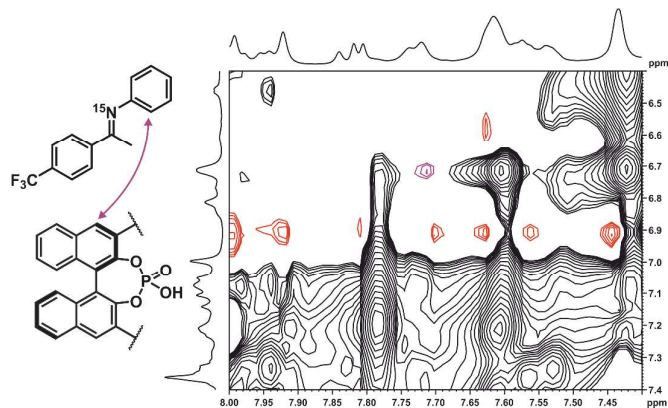

2D  $^1\text{H}$ ,  $^{15}\text{N}$  NOESY spectrum of complex *E-2c/1c*. The NOE that reveals structure *TYPE II E* is labeled in purple.

### *E-3a/1c* complex

#### Structure of *TYPE I E*

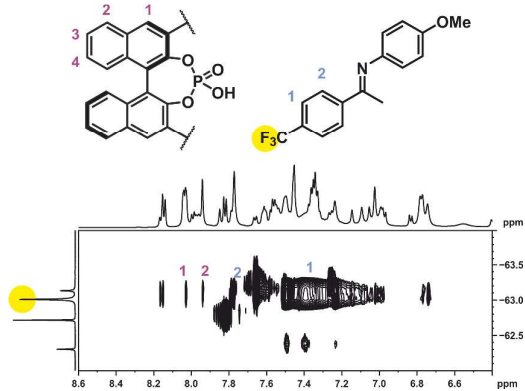

$^1\text{H}$ ,  $^{19}\text{F}$  HOESY spectrum of complex *E-3a/1c*. The trifluoromethyl group of *E-3a* inside the complex is labeled yellow. Additional signals are observed, due to chemical exchange and spin diffusion effects.

#### Structure of *TYPE II E*

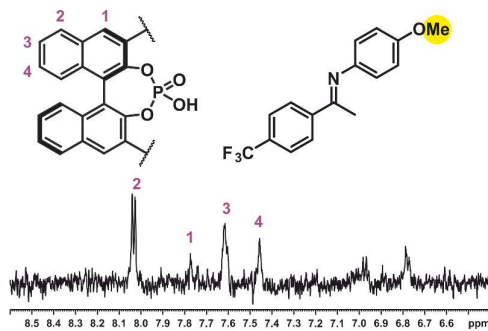

Selective NOESY spectrum of complex **E-3a/1c**. The excited methoxy group of imine **3a** is labeled yellow. Additional signals are observed, due to chemical exchange and spin diffusion effects.

## **E-3b/1c complex**

Structure of **TYPE I E**

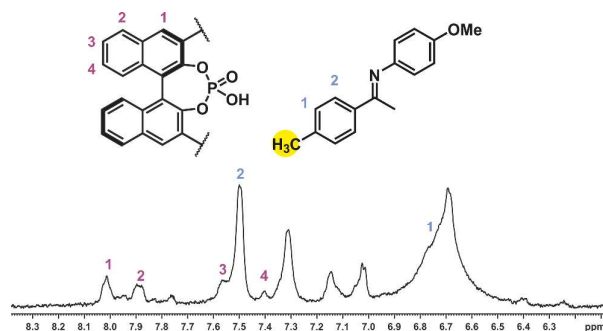

Selective NOESY spectrum of complex **E-3b/1c**. The excited methyl group of imine **3b** is labeled yellow. Additional signals are observed, due to chemical exchange and spin diffusion effects.

Structure of **TYPE II E**

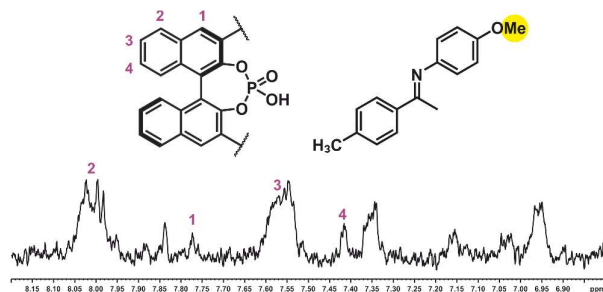

Selective NOESY spectrum of complex **E-3b/1c**. The excited methoxy group of imine **3b** is labeled yellow. Additional signals are observed, due to chemical exchange, chemical shift overlap and spin diffusion effects. Especially the overlap of the chemical shifts of the methoxy groups of both *E*- and *Z*-imine in complex **3b/1c** leads to many additional peaks in the selective NOESY.

## Build-up curve

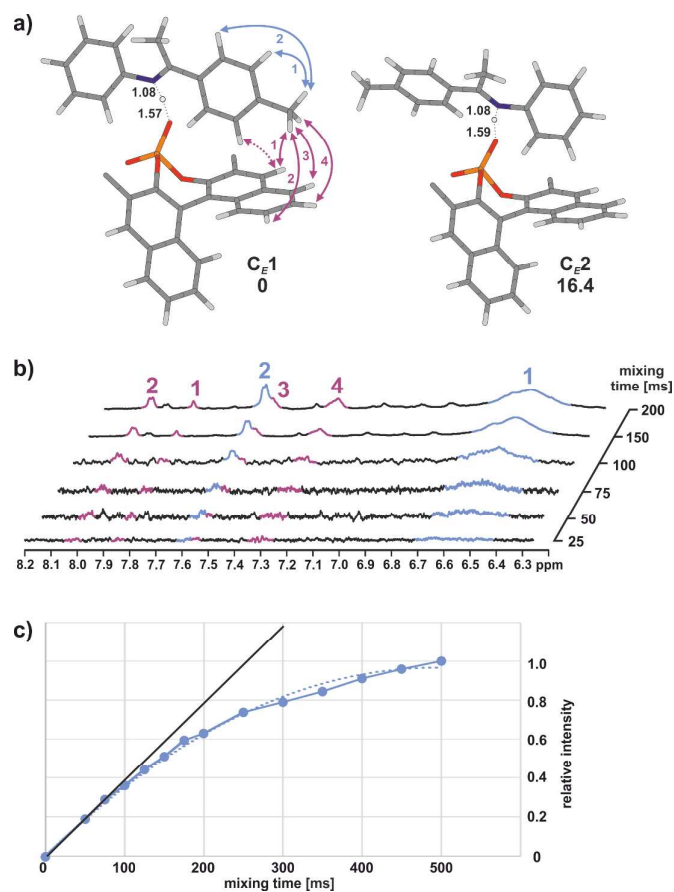

Figure S4; a) Complex structures **TYPE I E** and **TYPE II E** of complex **E-2a/1c**; b) Selective 1D NOESY build up curve; the  $\alpha$ -methyl group of the imine was excited; c) Build-up of the intensity of intramolecular NOE 1 (blue arrow in a)), a deviation from a linear build is visible even at 100 ms mixing time, due to spin diffusion effects.

## Structure identification of all Z-imine/TRIP complexes.

Selective  $^1\text{H}$  NOESY spectra were used to identify the structures of complexes **Z-2a-c/1c** and **Z-3a/1c** in solution. In every investigated complex, the same NOE pattern was observed. The spectra were measured in  $\text{CD}_2\text{Cl}_2$  at 180 K.

### Z-2a/1c complex

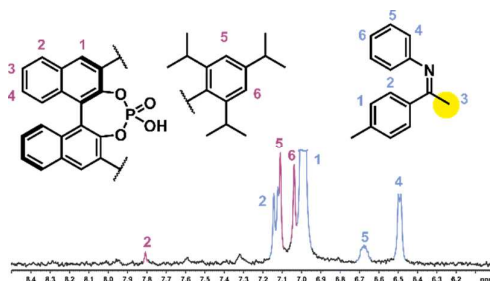

Selective NOESY spectrum of complex **Z-2a/1c**. The excited methyl group of imine **2a** is labeled yellow.

### Z-2b/1c complex

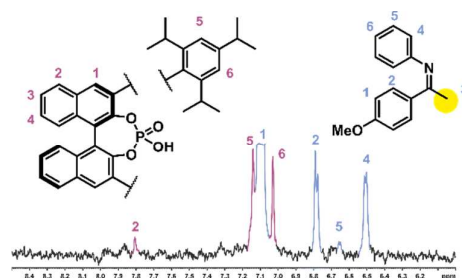

Selective NOESY spectrum of complex **Z-2b/1c**. The excited methyl group of imine **2b** is labeled yellow.

### Z-2c/1c complex

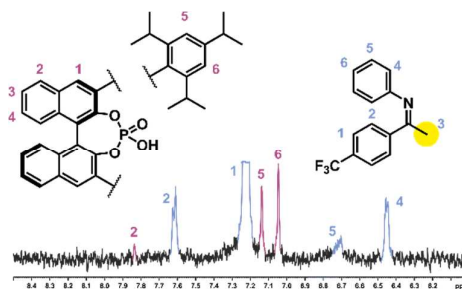

Selective NOESY spectrum of complex **Z-2c/1c**. The excited methyl group of imine **2c** is labeled yellow.

## Z-3a/1c complex

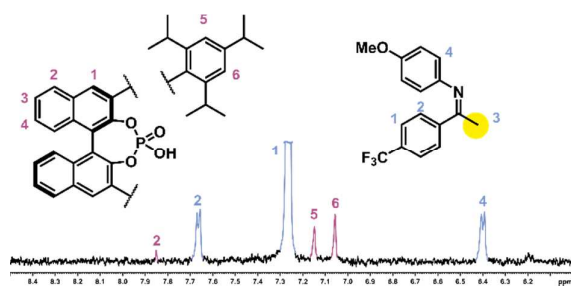

Selective NOESY spectrum of complex **Z-3a/1c**. The excited methyl group of imine **3a** is labeled yellow.

## Z-3b/1c complex

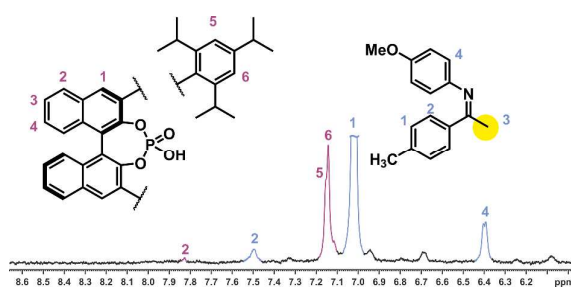

Selective NOESY spectrum of complex **Z-3b/1c**. The excited methyl group of imine **3b** is labeled yellow.

## Chemical shift analysis of the 2a/1c complexes

The measured  $^1\text{H}$  chemical shifts of the imine inside the complex are compared to the calculated chemical shifts.

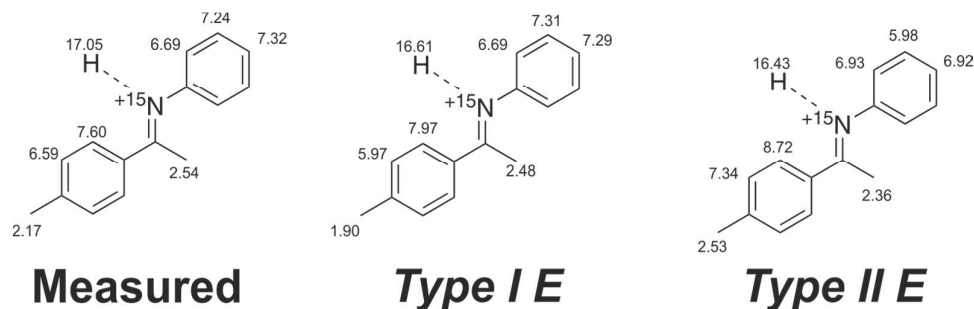

The calculated chemical shifts of complex **TYPE I E** show the same trend as the measured chemical shifts of the complex **E-2a/1c** in dichloromethane at 180 K. The strong high field shift of the *p*-methyl group and the nearby aromatic proton are a result of the strong deshielding due to the CH/ $\pi$  interaction of these protons and the BINOL backbone of the catalyst.

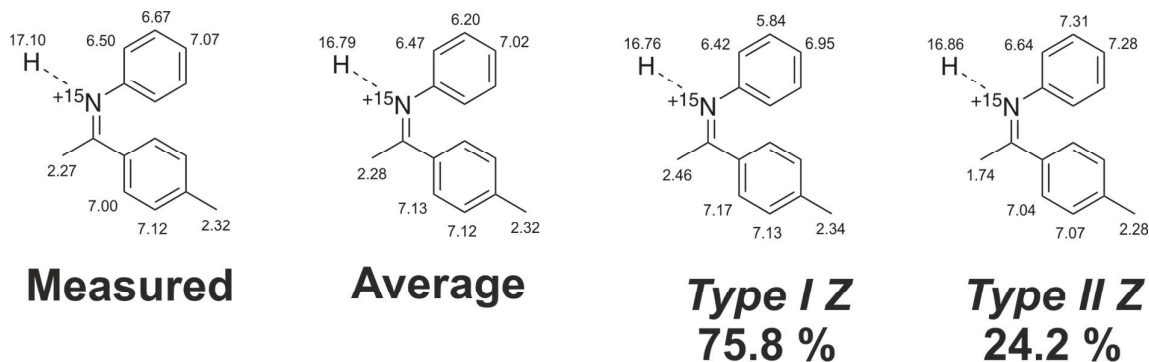

The weighted and averaged chemical shifts of the calculated structures **TYPE II Z** and **TYPE I Z** are in good agreement with the measured shifts of complex **E-2a/1c** in dichloromethane at 180 K.

## Spectrometer data

NMR experiments were performed on Bruker Avance III HD 400 MHz spectrometer, equipped with 5 mm BBO BB-1H/D probe head with Z-Gradients and a Bruker Avance III HD 600 MHz spectrometer, equipped with a 5 mm TBI 1H/19. Temperature was controlled in the VT-experiments by BVT 3000 and BVTE 3900. For NMR measurements employing standard NMR solvents 5 mm NMR tubes were used, if not other noted. For samples in freonic mixtures as solvents, 5 mm heavy wall (1.4 mm wall thickness) NMR tubes equipped with J. Young valves from Wilmad were used. NMR Data were processed, evaluated and plotted with TopSpin 3.2 software. Further plotting of the spectra was performed with Corel Draw X14 – X17 software.  $^1\text{H}$ ,  $^{13}\text{C}$  chemical shifts were referenced to TMS or the respective solvent signals. The heteronuclei  $^{15}\text{N}$ ,  $^{19}\text{F}$  and were referenced, employing  $\nu(\text{X}) = \nu(\text{TMS}) \times \Xi_{\text{reference}} / 100 \%$  according to Harris et al.<sup>[6]</sup> The following frequency ratios and reference compounds were used:  $\Xi(^{15}\text{N}) = 10.132912$  (lq.  $\text{NH}_3$ ) and  $\Xi(^{19}\text{F}) = 94.094011$  ( $\text{CCl}_3\text{F}$ )

## Pulse programs

All pulse programs used are standard Bruker NMR pulse programs.

## Acquisition Parameters

$^1\text{H}$  NMR: Pulse program: zg; Relaxation delay = 2 – 3 s, Acquisition time = 2.48 s, SW = 22.0 ppm, TD = 64k, NS = 8 – 64; zg30; Relaxation delay = 2 s, Acquisition time = 2.48 s, SW = 22.0 ppm, TD = 64k, NS = 8 – 64;

2D- $^1\text{H}$ ,  $^1\text{H}$  NOESY: Pulse program: noesygpph; Relaxation delay = 5 - 8 s, NS = 8-32, mixing time (D8) = 300.00 ms; TD = 4096; increments = 512 - 1k;

2D- $^1\text{H}$ ,  $^1\text{H}$  COSY: Pulse program: cosygpqf; Relaxation delay = 5 - 8 s, NS = 8-32, TD = 4096; increments = 512 - 1k;

$^{13}\text{C}$  NMR: Pulse program: zgpg30; Relaxation delay = 2.00 s, Acquisition time = 0.80 s, SW = 270.0 ppm, TD = 64k, NS = 1k – 2k;

2D- $^1\text{H}$ ,  $^{13}\text{C}$  HSQC: Pulse program: hsqcedetgpsisp2.3; Relaxation delay = 4 - 8 s, NS = 8-32,  $^1J_{\text{XH}} = 145$  Hz; TD = 4096; increments = 512 - 1k;

2D- $^1\text{H}$ ,  $^{13}\text{C}$  HMBC: Pulse program: hmbcgpplndqf; Relaxation delay = 4 - 8 s, NS = 8-32,  $^1J_{\text{XH}} = 145$  Hz,  $J_{\text{XH}}$ (long range) = 10 Hz; TD = 4096; increments = 512 - 1k;

$^{15}\text{N}$  NMR: Pulse program: zg; Relaxation delay = 10.00 s, Acquisition time = 0.54 s, SW = 502.8 ppm, TD = 32k, NS = 256 – 2048;

2D- $^1\text{H}$ ,  $^{15}\text{N}$  HMBC: Pulse program: inv4gplrndqf; Relaxation delay = 5 - 8 s, NS = 16-32, delay for evolution of long range couplings (D6) = 20.00 ms; TD = 4096; increments = 128 - 512;

$^{19}\text{F}$ -NMR: Pulse program: zg30; Relaxation delay = 2 – 3 s, Acquisition time = 11.60 s, SW = 10.0 ppm, TD = 128k, NS = 8 – 64;

2D- $^1\text{H}$ ,  $^{19}\text{F}$  HOESY: Pulse program: hoesyph; Relaxation delay = 5 - 8 s, NS = 16-32, mixing time (D8) = 500.00 ms; TD = 4096; increments = 1k;

Selective 1D- $^1\text{H}$ ,  $^1\text{H}$  NOESY: Pulse program: selnogp; Relaxation delay = 5 - 8 s, NS = 128-2k, mixing time (D8) = 25 – 1000 ms (150 – 200 ms and NS = 1k-2k for structure identification); TD = 64k;  $180^\circ$  shaped pulse = 50 – 150 ms, shape = Gauss 180;



## Data of the theoretical calculations

The CBS basis set extrapolation proceeds under the two point extrapolation procedure (eq.1 – 3) as implemented in ORCA3.0.3[Neese, F. *Wiley Interdiscip. Rev. Comput. Mol. Sci.* **2012**, 2, 73.] with the basis set Def2-SVP and Def2-TZVP.

$$E_{\text{SCF}}^X = E_{\text{SCF}}^\infty + Ae^{-\alpha\sqrt{X}} \quad \text{eq. 1}$$

$$E_{\text{corr,MP2}}^\infty = \frac{X^\beta E_{\text{corr,MP2}}^X - (X-1)^\beta E_{\text{corr,MP2}}^{X-1}}{X^\beta - (X-1)^\beta} \quad \text{eq.2}$$

$$E_{\text{MP2}}^\infty = E_{\text{corr,MP2}}^\infty + E_{\text{SCF}}^\infty \quad \text{eq. 3}$$

Since low vibrations can cause significant error in the calculation of entropy, the harmonic approximation is corrected using the procedure by Grimme[Grimme, S. *Chem. - A Eur. J.* **2012**, 18, 9955.], which employs a weighted partition function between harmonic and free rotor approximations.

### NCI analysis

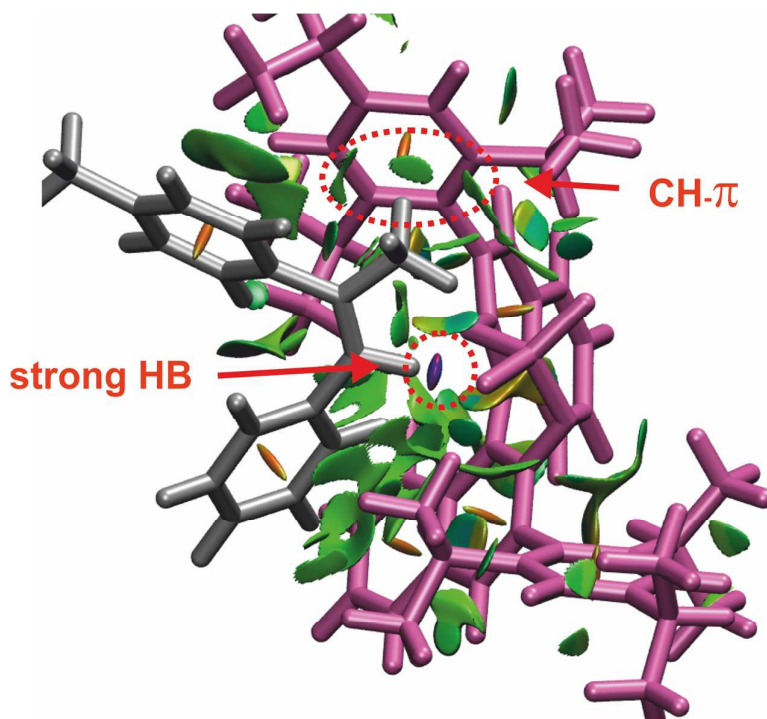

Figure S5. NCI analysis of Z-2a/1c *Type II*. Rotated view to highlight CH- $\pi$  interaction between  $\alpha$ -methyl group of the imine and 2,4,6-triisopropylphenyl group of the catalyst.

Table S1. Calculated energies of the (*R*)-TRIP imine complexes the solution phase

|                          | Etot TPSS-D3  | G180 TPSS-D3  | Nimag | G180,solv.<br>SCS-MP2 |
|--------------------------|---------------|---------------|-------|-----------------------|
|                          | Def2-SVP      | Def2-SVP      |       | CBS                   |
| <b>me-ketimine/TRIP</b>  |               |               |       |                       |
| E-2a/1c conf0 (Type I)   | -3216.1293034 | -3214.9779909 | 0     | -3210.8402178         |
| E-2a/1c conf1 (Type I)   | -3216.1292922 | -3214.9783768 | 0     | -3210.8405949         |
| E-2a/1c conf2 (Type I)   | -3216.1281091 | -3214.9776036 | 0     | -3210.8404332         |
|                          |               |               |       |                       |
| E-2a/1c conf0 (Type II)  | -3216.1288254 | -3214.9770885 | 0     | -3210.8379438         |
| E-2a/1c conf1 (Type II)  | -3216.1288923 | -3214.9771949 | 0     | -3210.8380750         |
| E-2a/1c conf2 (Type II)  | -3216.1281937 | -3214.9763154 | 0     | -3210.8371123         |
|                          |               |               |       |                       |
| Z-2a/1c conf0 (Type II)  | -3216.1239436 | -3214.9742384 | 0     | -3210.8370365         |
| Z-2a/1c conf1 (Type II)  | -3216.1239479 | -3214.9737243 | 0     | -3210.8365321         |
| Z-2a/1c conf2 (Type II)  | -3216.1230459 | -3214.9719391 | 0     | -3210.8358809         |
| Z-2a/1c conf3 (Type II)  | -3216.1243248 | -3214.9733132 | 0     | -3210.8352594         |
|                          |               |               |       |                       |
| Z-2a/1c conf0 (Type I)   | -3216.1216601 | -3214.9718608 | 0     | -3210.8346718         |
| Z-2a/1c conf1 (Type I)   | -3216.1216456 | -3214.9716979 | 0     | -3210.8346181         |
| Z-2a/1c conf2 (Type I)   | -3216.1212309 | -3214.9701984 | 0     | -3210.8321087         |
|                          |               |               |       |                       |
| <b>ome-ketimine/TRIP</b> |               |               |       |                       |
| E-2b/1c conf0 (Type I)   | -3291.2958062 | -3290.143671  | 0     | -3285.9698539         |
| E-2b/1c conf1 (Type I)   | -3291.2957223 | -3290.143170  | 0     | -3285.9693529         |
| E-2b/1c conf2 (Type I)   | -3291.2947169 | -3290.142961  | 0     | -3285.9689460         |
|                          |               |               |       |                       |
| E-2b/1c conf0 (Type II)  | -3291.2952666 | -3290.143039  | 0     | -3285.9678192         |
| E-2b/1c conf1 (Type II)  | -3291.2940632 | -3290.142076  | 0     | -3285.9676053         |
| E-2b/1c conf2 (Type II)  | -3291.2955281 | -3290.141910  | 0     | -3285.9676420         |
| E-2b/1c conf3 (Type II)  | -3291.2942653 | -3290.141420  | 0     | -3285.9668046         |
| E-2b/1c conf4 (Type II)  | -3291.2942222 | -3290.141566  | 0     | -3285.9673435         |
| E-2b/1c conf5 (Type II)  | -3291.2953907 | -3290.142301  | 0     | -3285.9680170         |
|                          |               |               |       |                       |
| Z-2b/1c conf0 (Type II)  | -3291.2881317 | -3290.138687  | 0     | -3285.9654871         |
| Z-2b/1c conf1 (Type II)  | -3291.2880073 | -3290.138259  | 0     | -3285.9657424         |
| Z-2b/1c conf2 (Type II)  | -3291.2873514 | -3290.136991  | 0     | -3285.9656882         |
| Z-2b/1c conf3 (Type II)  | -3291.2887209 | -3290.139127  | 0     | -3285.9655835         |
| Z-2b/1c conf4 (Type II)  | -3291.2881877 | -3290.137369  | 0     | -3285.9655633         |
| Z-2b/1c conf5 (Type II)  | -3291.2881191 | -3290.138095  | 0     | -3285.9654841         |
| Z-2b/1c conf6 (Type II)  | -3291.2873533 | -3290.136156  | 0     | -3285.9647129         |
| Z-2b/1c conf7 (Type II)  | -3291.2887316 | -3290.138912  | 0     | -3285.9650782         |
|                          |               |               |       |                       |
| Z-2b/1c conf0 (Type I)   | -3291.2861415 | -3290.135660  | 0     | -3285.9628199         |
| Z-2b/1c conf1 (Type I)   | -3291.2861924 | -3290.135523  | 0     | -3285.9628561         |
| Z-2b/1c conf2 (Type I)   | -3291.2858786 | -3290.134948  | 0     | -3285.9615452         |
| Z-2b/1c conf3 (Type I)   | -3291.2863205 | -3290.137066  | 0     | -3285.9639722         |
| Z-2b/1c conf4 (Type I)   | -3291.2864156 | -3290.136289  | 0     | -3285.9632361         |
| Z-2b/1c conf5 (Type I)   | -3291.2860152 | -3290.137701  | 0     | -3285.9634013         |
|                          |               |               |       |                       |
| <b>cf3-ketimine/TRIP</b> |               |               |       |                       |
| E-2c/1c conf0 (Type I)   | -3513.6465830 | -3512.5205064 | 0     | -3508.3958759         |
| E-2c/1c conf1 (Type I)   | -3513.6465235 | -3512.5207007 | 0     | -3508.3960729         |
| E-2c/1c conf2 (Type I)   | -3513.6457328 | -3512.5204823 | 0     | -3508.3959762         |

|                                   |               |               |   |               |
|-----------------------------------|---------------|---------------|---|---------------|
|                                   |               |               |   |               |
| E-2c/1c conf0 (Type II)           | -3513.6375353 | -3512.5171876 | 0 | -3508.3919597 |
| E-2c/1c conf1 (Type II)           | -3513.6375690 | -3512.5187441 | 0 | -3508.3936257 |
| E-2c/1c conf2 (Type II)           | -3513.6372055 | -3512.5172824 | 0 | -3508.3923135 |
|                                   |               |               |   |               |
| Z-2c/1c conf0 (Type II)           | -3513.6411194 | -3512.5141016 | 0 | -3508.3916784 |
| Z-2c/1c conf1 (Type II)           | -3513.6411936 | -3512.5140964 | 0 | -3508.3917285 |
| Z-2c/1c conf2 (Type II)           | -3513.6399301 | -3512.5135202 | 0 | -3508.3919537 |
| Z-2c/1c conf3 (Type II)           | -3513.6416873 | -3512.5142537 | 0 | -3508.3903968 |
|                                   |               |               |   |               |
| Z-2c/1c conf0 (Type I)            | -3513.6375353 | -3512.5110397 | 0 | -3508.3897986 |
| Z-2c/1c conf1 (Type I)            | -3513.6375690 | -3512.5114201 | 0 | -3508.3900476 |
| Z-2c/1c conf2 (Type I)            | -3513.6372055 | -3512.5104673 | 0 | -3508.3876702 |
|                                   |               |               |   |               |
| <b>ome-cf3-<br/>ketimine/TRIP</b> |               |               |   |               |
| E-3a/1c conf0 (Type I)            | -3628.111866  | -3626.9518503 | 0 | -3622.7355951 |
| E-3a/1c conf1 (Type I)            | -3628.111719  | -3626.9517008 | 0 | -3622.7359474 |
| E-3a/1c conf2 (Type I)            | -3628.110813  | -3626.9529548 | 0 | -3622.7367638 |
| E-3a/1c conf3 (Type I)            | -3628.112400  | -3626.9534522 | 0 | -3622.7374813 |
| E-3a/1c conf4 (Type I)            | -3628.112112  | -3626.9539513 | 0 | -3622.7383783 |
| E-3a/1c conf5 (Type I)            | -3628.111580  | -3626.9526340 | 0 | -3622.7359897 |
|                                   |               |               |   |               |
| E-3a/1c conf0 (Type II)           | -3628.111930  | -3626.9529648 | 0 | -3622.7347878 |
| E-3a/1c conf1 (Type II)           | -3628.112139  | -3626.9524390 | 0 | -3622.7341516 |
| E-3a/1c conf2 (Type II)           | -3628.111372  | -3626.9519985 | 0 | -3622.7342329 |
|                                   |               |               |   |               |
| Z-3a/1c conf0 (Type II)           | -3628.106399  | -3626.9475052 | 0 | -3622.7332675 |
| Z-3a/1c conf1 (Type II)           | -3628.106393  | -3626.9473794 | 0 | -3622.7330704 |
| Z-3a/1c conf2 (Type II)           | -3628.104956  | -3626.9463497 | 0 | -3622.7331959 |
| Z-3a/1c conf3 (Type II)           | -3628.107676  | -3626.9492683 | 0 | -3622.7338728 |
|                                   |               |               |   |               |
| Z-3a/1c conf0 (Type I)            | -3628.101010  | -3626.9434394 | 0 | -3622.7305094 |
| Z-3a/1c conf1 (Type I)            | -3628.101616  | -3626.9416407 | 0 | -3622.7262811 |
| Z-3a/1c conf2 (Type I)            | -3628.101561  | -3626.9436228 | 0 | -3622.7309610 |
| Z-3a/1c conf3 (Type I)            | -3628.101626  | -3626.9438736 | 0 | -3622.7311135 |
| Z-3a/1c conf4 (Type I)            | -3628.101963  | -3626.9422244 | 0 | -3622.7264107 |
|                                   |               |               |   |               |
| <b>ome-ch3-<br/>ketimine/TRIP</b> |               |               |   |               |
| E-3b/1c conf0 (Type I)            | -3330.592144  | -3329.4088051 | 0 | -3325.1805363 |
| E-3b/1c conf1 (Type I)            | -3330.592006  | -3329.4089581 | 0 | -3325.1810063 |
| E-3b/1c conf2 (Type I)            | -3330.591542  | -3329.4093499 | 0 | -3325.1804439 |
| E-3b/1c conf3 (Type I)            | -3330.593070  | -3329.4106280 | 0 | -3325.1822841 |
| E-3b/1c conf4 (Type I)            | -3330.592881  | -3329.4105133 | 0 | -3325.1823263 |
|                                   |               |               |   |               |
| E-3b/1c conf0 (Type II)           | -3330.594000  | -3329.4103556 | 0 | -3325.1787176 |
| E-3b/1c conf1 (Type II)           | -3330.593958  | -3329.4105325 | 0 | -3325.1790970 |
| E-3b/1c conf2 (Type II)           | -3330.593524  | -3329.4096527 | 0 | -3325.1785529 |
|                                   |               |               |   |               |
| Z-3b/1c conf0 (Type II)           | -3330.588810  | -3329.4073733 | 0 | -3325.1791460 |
| Z-3b/1c conf1 (Type II)           | -3330.588676  | -3329.4071171 | 0 | -3325.1788328 |
| Z-3b/1c conf2 (Type II)           | -3330.587739  | -3329.4052449 | 0 | -3325.1780921 |

|                              |              |               |   |               |
|------------------------------|--------------|---------------|---|---------------|
| Z-3b/1c conf3 (Type II)      | -3330.589223 | -3329.4070524 | 0 | -3325.1776291 |
| Z-3b/1c conf0 (Type I)       | -3330.584634 | -3329.4032057 | 0 | -3325.1753078 |
| Z-3b/1c conf1 (Type I)       | -3330.584538 | -3329.4035100 | 0 | -3325.1754672 |
| Z-3b/1c conf2 (Type I)       | -3330.584521 | -3329.4023288 | 0 | -3325.1726030 |
| Z-3b/1c conf3 (Type I)       | -3330.585319 | -3329.4033326 | 0 | -3325.1751190 |
| Z-3b/1c conf4 (Type I)       | -3330.585216 | -3329.4032161 | 0 | -3325.1751941 |
| Z-3b/1c conf5 (Type I)       | -3330.584905 | -3329.4038217 | 0 | -3325.1740197 |
| <b>ome-no2-ketimine/TRIP</b> |              |               |   |               |
| E-3c/1c conf0 (Type I)       | -3495.681803 | -3494.5237310 | 0 | -3490.2561506 |
| E-3c/1c conf1 (Type I)       | -3495.681937 | -3494.5233009 | 0 | -3490.2559409 |
| E-3c/1c conf2 (Type I)       | -3495.681214 | -3494.5223690 | 0 | -3490.2543048 |
| E-3c/1c conf0 (Type II)      | -3495.683907 | -3494.5256113 | 0 | -3490.2545437 |
| E-3c/1c conf1 (Type II)      | -3495.683703 | -3494.5247775 | 0 | -3490.2537381 |
| E-3c/1c conf2 (Type II)      | -3495.682741 | -3494.5247566 | 0 | -3490.2541695 |

Optimized geometry

### Solution Phase 2a/1c

#### *E*-configuration

E-2a/1c (Type I; conf0)

```

1\1\GINC-LOGIN\Fopt\RTPSSSTPSS\def2SVP/W06\C65H72N1O4P1\JHIOE\20-Dec-20
14\0\#p opt tpsstps\def2svp/w06 densityfit empiricdispersion=gd3 s
crf=(smd,solvent=ch2cl2,read)\title\0,1\p,-0.1126479016,-0.462480476
1,-1.2372328786\O,-1.4272845126,0.5640547744,-1.3980511967\O,0.8329740
653,0.4683672862,-0.1759706766\O,0.4925398423,-0.579455675,-2.60446895
42\O,-0.469448668,-1.6640532667,-0.3677996096\C,-1.298597205,2.2613951
441,0.2849235484\C,-1.9802225745,1.1911739916,-0.3021237546\C,-3.27900
53629,0.7652044112,0.1215294585\C,-3.8632487064,1.4306859834,1.1912956
121\H,-4.8654470709,1.1403220866,1.5236087856\C,-3.1794381872,2.460319
3149,1.8987137342\C,-1.8678452328,2.8726159221,1.4616304382\C,-1.16580
30596,3.8331085673,2.2513769499\H,-0.1509359621,4.1214978914,1.9633407
957\C,-1.7406566961,4.3854641325,3.3867555149\H,-1.1764069414,5.112503
6254,3.9811313871\C,-3.0503445598,4.0100576973,3.789961075\H,-3.495753
0069,4.4580885616,4.6848582146\C,-3.7508185411,3.0626338886,3.06007052
78\H,-4.7516023564,2.7449732693,3.3741196122\C,0.0041600272,2.71773166
22,-0.2784130069\C,1.0516805112,1.804567912,-0.43741567\C,2.3859762201
,2.2014104895,-0.7646805258\C,2.6188795203,3.5417625231,-1.0386748252\
H,3.6348065366,3.875548241,-1.2740899654\C,1.5638255644,4.5000225942,-
1.0358949936\C,0.2338261943,4.091171724,-0.6550978974\C,-0.8109834785,
5.0632554149,-0.701102647\H,-1.8319615243,4.7604098539,-0.4507246905\C
,-0.5526004213,6.374205633,-1.074072715\H,-1.3725421844,7.0999828387,-
1.1110639921\C,0.7644092355,6.7823728239,-1.4163342523\H,0.9561043036,
7.8220820124,-1.7033998641\C,1.7989273259,5.8601923029,-1.3998504347\H
,2.8164322218,6.1582119207,-1.6774651053\C,-1.4787912512,-0.6230495263
,4.6703048052\C,-0.9842584849,-1.8486316053,5.1641037931\H,-1.34843961
39,-2.2299989796,6.1244135855\C,-0.0339425708,-2.5870538535,4.45135399
7\H,0.3239050851,-3.5356108233,4.8631207082\C,0.4214037563,-2.13716664
65,3.1895312381\C,-0.0634411849,-0.9022494406,2.6945122429\H,0.3016093

```

104,-0.5029348368,1.7456039919\C,-0.984963782,-0.1605567967,3.43061563  
88\H,-1.3313009653,0.7981605827,3.0329618641\C,1.391292986,-2.93422824  
61,2.4234025086\C,2.4078200629,-3.7650264896,3.147131138\H,3.307110898  
5,-3.9226816132,2.5315461172\H,1.9852726655,-4.7562232077,3.3940915328  
\H,2.6852236125,-3.2727288984,4.0914908541\N,1.3603843166,-2.864731736  
6,1.1106474154\H,0.5966009657,-2.2793030688,0.6177126406\C,2.195279040  
3,-3.5366619731,0.1626507928\C,2.7062769888,-2.7744903347,-0.904577558  
\H,2.5304626853,-1.6966747872,-0.9481455078\C,3.4666636294,-3.40514651  
21,-1.8966604699\H,3.8707657722,-2.8068941053,-2.7183433481\C,3.717116  
7681,-4.7845057218,-1.8301770229\C,3.1973342092,-5.5394026846,-0.76671  
67176\H,3.3771312911,-6.6183848007,-0.7163149783\C,2.4277835221,-4.923  
4646208,0.2295711059\H,1.9851846728,-5.5190874853,1.0321162256\C,3.493  
1334531,1.1911966272,-0.7298291995\C,4.0605510704,0.6941047798,-1.9309  
169709\C,3.971291968,0.7320011001,0.530795681\C,5.1143656523,-0.237836  
3729,-1.8464105835\C,5.0161066681,-0.2062909212,0.5598007445\C,5.60179  
25028,-0.7080434652,-0.6172484641\H,5.5585000732,-0.6248464954,-2.7710  
76375\H,5.3836438905,-0.5584146989,1.5284863816\C,-3.980729902,-0.3533  
782816,-0.5849773558\C,-4.2243526646,-1.5824854122,0.0867695686\C,-4.4  
244573083,-0.1797452766,-1.9264852619\C,-4.925322805,-2.5992786975,-0.  
5909342362\C,-5.1173387455,-1.2270487521,-2.5574443332\C,-5.3832422205  
,-2.4461627431,-1.908491333\H,-5.1157148042,-3.5484662616,-0.075115651  
2\H,-5.4661077289,-1.0821310588,-3.5868018729\H,4.3127554314,-5.272008  
6627,-2.60904075\C,-2.5150121768,0.17435047,5.4212314966\H,-3.46095626  
54,0.2067497154,4.8484297689\H,-2.7260807541,-0.2602185816,6.412061831  
9\H,-2.1884746288,1.2211959857,5.555088898\C,-4.2054300642,1.124778503  
9,-2.6960033157\H,-3.6229200012,1.8074854376,-2.0552102307\C,-3.729333  
0305,-1.8521009005,1.5096013992\C,-6.1495392434,-3.5654714985,-2.60798  
69461\H,-6.180282904,-4.4221355221,-1.9084362414\C,-4.8995336648,-1.92  
37153689,2.5123226603\H,-4.5232178389,-2.095969749,3.5376181705\H,-5.4  
864216245,-0.9877722548,2.5158416995\H,-5.5872981483,-2.7529686542,2.2  
627147256\C,-5.4372689307,-4.0346414204,-3.8931986989\H,-5.3973933581,  
-3.2265802816,-4.6466255313\H,-4.4008420614,-4.3535734784,-3.682629436  
9\H,-5.9746191856,-4.8881134483,-4.3461266652\C,-7.6054613206,-3.14841  
13001,-2.9032035996\H,-8.1679930748,-3.9853284835,-3.3566575958\H,-8.1  
290945732,-2.8436339536,-1.9793958819\H,-7.6399158359,-2.2977254808,-3  
.6088832948\C,-3.3866145328,0.8994681785,-3.9832856098\H,-3.9302500359  
,0.2598761811,-4.7031500795\H,-3.1828697935,1.8651852884,-4.4819030711  
\H,-2.4200674411,0.4215656477,-3.751306876\C,-5.5475159952,1.825363138  
2,-2.9946918017\H,-5.3757258296,2.7930445465,-3.5011087936\H,-6.186993  
6849,1.208987169,-3.6530861521\H,-6.1094345599,2.0213302922,-2.0635846  
224\C,6.7412044465,-1.7235975418,-0.5679306699\H,6.8285280216,-2.15710  
6463,-1.5822685257\C,3.56376684,1.1536896721,-3.3027000796\H,2.5981203  
995,1.6651646491,-3.1470703267\C,3.4001608593,1.287552428,1.8382217006  
\H,2.3372422985,1.5265903099,1.6614133945\C,8.0808743257,-1.0296472027  
,-0.2406017208\H,8.911859254,-1.7589834072,-0.2461996473\H,8.311707245  
9,-0.239584925,-0.9772850645\H,8.0452823711,-0.5606226828,0.7603004542  
\C,6.4660487171,-2.8797246177,0.413544208\H,6.4435994463,-2.5269805493  
,1.4608464918\H,5.4999043066,-3.3676649554,0.1968031901\H,7.2610286559  
,-3.6439627123,0.3407996313\C,3.4486346687,0.289398647,3.0086758332\H,  
3.0279849685,-0.6886199365,2.7209510339\H,4.4803210568,0.1238449965,3.  
369132372\H,2.8602832432,0.6764714473,3.8593813029\C,4.1106830949,2.60  
55568895,2.2177757614\H,4.026925617,3.3540614629,1.4106851673\H,3.6686  
175261,3.0384662726,3.1341565957\H,5.1853770805,2.4262056665,2.4060117  
454\C,4.5448367917,2.169985863,-3.9249922408\H,4.6919669143,3.04456845  
55,-3.2669100021\H,5.5345151832,1.7072002595,-4.0980568045\H,4.1651257  
25,2.5338745258,-4.8976181637\C,3.2973777887,-0.0221688074,-4.26234698

26\H,2.8820740187,0.3576564221,-5.2140751016\H,4.2225824454,-0.5763260  
554,-4.5051330812\H,2.5602015033,-0.7140823466,-3.823689189\C,-2.85693  
90459,-3.1216766925,1.5813784034\H,-3.4437356077,-4.0342434959,1.36786  
09774\H,-2.0285240431,-3.0559874747,0.8572400539\H,-2.427913914,-3.230  
197435,2.5940726036\H,-3.0872889763,-1.0074751155,1.8073858934\Versio  
n=ES64L-G09RevD.01\State=1-A\HF=-3216.1293034\RMSD=7.898e-09\RMSF=2.93  
3e-06\Dipole=1.7071068,-2.3988167,5.0282876\Quadrupole=-8.3754467,12.7  
911566,-4.4157099,-17.1936985,-4.8680905,-13.7482685\PG=C01 [X(C65H72N  
1O4P1)]\@

E-2a/1c (Type I; conf1)

1\1\GINC-LOGIN\FOpt\RTPSSSTPSS\def2SVP/W06\C65H72N1O4P1\JHIOE\20-Dec-20  
14\0\#p opt tpsstps\def2svp/w06 densityfit empiricdispersion=gd3 s  
crf=(smd,solvent=ch2cl2,read)\title\0,1\P,-0.1011446316,-0.381696061  
9,-1.3053979587\O,-1.3822205925,0.6833982565,-1.4840537197\O,0.8261569  
238,0.4942645244,-0.1829509614\O,0.5563266402,-0.4716094397,-2.6505793  
637\O,-0.5213671571,-1.5974615169,-0.4855823064\C,-1.2551259372,2.3460  
146336,0.2328614085\C,-1.9467616045,1.3020957171,-0.3890764233\C,-3.26  
17405104,0.8936664028,-0.0005778465\C,-3.8595223409,1.5585199933,1.061  
9581279\H,-4.8753214905,1.2848511886,1.3655159574\C,-3.1739990527,2.56  
69865261,1.797837331\C,-1.8420301097,2.954865256,1.4019800193\C,-1.142  
3848445,3.8919479964,2.2214028534\H,-0.1141332608,4.1615451233,1.96492  
31962\C,-1.7376376598,4.4468599707,3.344949566\H,-1.175092692,5.156129  
2462,3.9620101474\C,-3.0664190836,4.0972562364,3.7065411205\H,-3.52790  
65596,4.5474932508,4.5921384707\C,-3.7653967878,3.1712557218,2.9482729  
763\H,-4.7816409884,2.8729632748,3.2301642429\C,0.0782502652,2.7703599  
429,-0.2831085757\C,1.100635401,1.8250850793,-0.416500735\C,2.45779191  
47,2.1792157103,-0.6940301957\C,2.7422028406,3.5128623136,-0.952248756  
7\H,3.7753307261,3.8153434064,-1.1525996677\C,1.7187251932,4.504781433  
6,-0.9769922452\C,0.3648476838,4.1381299387,-0.63931265\C,-0.645058534  
7,5.1450354615,-0.7080545334\H,-1.682173376,4.8750714863,-0.4882273179  
\C,-0.3327534006,6.4486454497,-1.0650711833\H,-1.1268808491,7.20144178  
73,-1.1203611332\C,1.0063261264,6.8143282506,-1.3672265366\H,1.2409405  
901,7.8483668756,-1.6425671338\C,2.0089175009,5.8581535128,-1.32557488  
18\H,3.043466893,6.1238995476,-1.5712622337\C,-1.584151431,-0.64247980  
26,4.5774403118\C,-1.1209128973,-1.8865528692,5.0549787737\H,-1.503949  
8434,-2.2767570046,6.0043300726\C,-0.1792602886,-2.6331463375,4.339347  
5748\H,0.1530479552,-3.5963942774,4.7380865851\C,0.2978735054,-2.17274  
01039,3.0893781958\C,-0.154265571,-0.9187481673,2.6116485325\H,0.22824  
48496,-0.5116869762,1.6730956645\C,-1.0666851908,-0.169357515,3.351355  
864\H,-1.3895311471,0.8027625269,2.9662789967\C,1.252029221,-2.9835153  
298,2.3179290403\C,2.2362075586,-3.8582277046,3.0352006532\H,3.1457525  
741,-4.0098473292,2.4327018419\H,1.791456013,-4.8500982998,3.235886793  
2\H,2.5027573277,-3.4063007309,4.0023176349\N,1.2356930519,-2.89314914  
16,1.0058794202\H,0.4998414666,-2.2730453928,0.5139785958\C,2.05950063  
44,-3.5754048948,0.0557666074\C,2.5970833927,-2.8139365393,-0.99896111  
76\H,2.4481467889,-1.7318054497,-1.0310587026\C,3.3482297273,-3.451215  
3106,-1.9936087908\H,3.7726074951,-2.8537337523,-2.8055299454\C,3.5627  
213039,-4.8373838642,-1.942870646\C,3.0165881379,-5.5914380767,-0.8922  
006232\H,3.1681788868,-6.6752226455,-0.853969633\C,2.256731437,-4.9682  
294102,0.1070192617\H,1.7940072964,-5.5627122937,0.8988148188\C,3.5295  
802695,1.1323832353,-0.6243917281\C,4.1237516198,0.6212419,-1.80629119  
04\C,3.9494246799,0.6558797987,0.6513414348\C,5.1469227033,-0.34167973  
28,-1.6882123345\C,4.9643844176,-0.3127586088,0.7131173509\C,5.5780927  
381,-0.826898253,-0.4444970741\H,5.6134878019,-0.738942672,-2.59731778  
97\H,5.2899866599,-0.6783011725,1.6920451473\C,-3.9654007275,-0.208325

259,-0.7323770024\C,-4.2151066389,-1.4497247024,-0.0817542717\C,-4.403  
295985,-0.0098372208,-2.0695966473\C,-4.9251778588,-2.4479597938,-0.77  
22008457\C,-5.1053468704,-1.0438093563,-2.7177715269\C,-5.3839462169,-  
2.2680020434,-2.0887080028\H,-5.1175249998,-3.4011325731,-0.2664297984  
\H,-5.4517075286,-0.8891770839,-3.7472221083\H,4.1508942893,-5.3304652  
297,-2.7238786999\C,-2.6052179959,0.1681538305,5.335065329\H,-3.508443  
4011,0.3251407809,4.7170904552\H,-2.9054450054,-0.3269975374,6.2729864  
295\H,-2.2087065084,1.1708957492,5.5780871415\C,-4.1620138516,1.302235  
7229,-2.8181784095\H,-3.5824570465,1.9688809962,-2.1578208417\C,-3.716  
62582,-1.7416229063,1.3351139161\C,-6.1477767541,-3.3699028853,-2.8177  
703254\H,-6.4123095491,-2.9752442266,-3.816995764\C,-4.8741328141,-1.7  
445970824,2.3548971493\H,-4.4913677052,-1.9274040615,3.37590743\H,-5.4  
130858454,-0.780712508,2.3588972167\H,-5.6062975459,-2.5397634079,2.12  
04387604\C,-7.4614934591,-3.7284410246,-2.0929925225\H,-7.2631428158,-  
4.1521577228,-1.0911014376\H,-8.1025329606,-2.8379798441,-1.9636617143  
\H,-8.0315373383,-4.4812335604,-2.668024392\C,-5.2703783565,-4.6216812  
203,-3.0258327233\H,-5.8173414419,-5.3905275634,-3.6021295419\H,-4.344  
8254732,-4.3736324968,-3.5753544594\H,-4.9794440805,-5.0691039692,-2.0  
575222566\C,-3.3244403076,1.0856550429,-4.0950358435\H,-3.8640819756,0  
.46424008,-4.8334866901\H,-3.0996486249,2.056061072,-4.5751782701\H,-2  
.3681306169,0.5914724689,-3.8544734995\C,-5.49161126,2.0209281392,-3.1  
282191869\H,-5.3019764653,2.9932171975,-3.619204749\H,-6.1274205513,1.  
420269899,-3.8044099281\H,-6.0655255817,2.2106767394,-2.2031532434\C,6  
.6819245802,-1.8771508405,-0.3506598924\H,6.8800778546,-2.2300172072,-  
1.3804431201\C,3.6899867875,1.1018420622,-3.1920843726\H,2.7291703479,  
1.6305717226,-3.0678491395\C,3.3479003912,1.2239027685,1.9400056931\H,  
2.293905629,1.4759611072,1.729797007\C,7.9888224294,-1.2621329899,0.19  
38059568\H,8.7982594251,-2.0150629732,0.2097708636\H,8.3214870838,-0.4  
130454251,-0.4296630535\H,7.8499823746,-0.8906578788,1.2262089852\C,6.  
2551200296,-3.0985548511,0.4890707974\H,6.0774694351,-2.8212373172,1.5  
444441139\H,5.32835399,-3.54961069,0.0943915122\H,7.0453258343,-3.8713  
040344,0.4769363646\C,3.3484658765,0.2304761239,3.1153186878\H,2.92783  
43471,-0.7450445703,2.819667406\H,4.3664216465,0.0577358637,3.50984957  
81\H,2.7367437327,0.6274020137,3.9447052025\C,4.0642018684,2.533015540  
1,2.339167862\H,4.0152159138,3.2818409884,1.5298490341\H,3.6001204798,  
2.9728588915,3.2412489857\H,5.129980933,2.339091082,2.5605005348\C,4.7  
149105375,2.1021871234,-3.7673203357\H,4.8602209136,2.9651761708,-3.09  
38790327\H,5.6988094913,1.6180848551,-3.9126300714\H,4.3764001354,2.48  
58714447,-4.7474731473\C,3.4361740489,-0.0586552948,-4.1732798286\H,3.  
0681756435,0.3394937263,-5.1369221281\H,4.3571640675,-0.6321350443,-4.  
3847615549\H,2.666013465,-0.7363977543,-3.7713690267\C,-2.9158691077,-  
3.0572986217,1.4067142372\H,-3.5553232496,-3.9385314006,1.2137756621\H  
,-2.0963120255,-3.0455863227,0.6699851393\H,-2.4785703589,-3.179243202  
6,2.4142505281\H,-3.0250802425,-0.9317578031,1.6179717722\\Version=ES6  
4L-G09RevD.01\State=1-A\HF=-3216.1292922\RMSD=9.492e-09\RMSF=2.926e-06  
\Dipole=1.5171864,-2.5923313,5.0133836\Quadrupole=-9.3499642,14.769828  
1,-5.4198639,-16.1881319,-5.6158761,-12.6980384\PG=C01 [X(C65H72N1O4P1  
)]\@

E-2a/1c (Type I; conf2)

1\1\GINC-WORKER\FOpt\RTSPSS\def2SVP\W06\C65H72N1O4P1\JHIOE\31-Oct-2  
015\0\#p tpsstps/def2svp/w06 densityfit empiricdispersion=gd3 opt  
scr=(smd,solvent=ch2cl2,read)\title\0,1\P,-0.0593625357,-0.51096824  
05,-1.2261607746\O,-1.2890380605,0.5795682445,-1.553018743\O,0.8433781  
553,0.4169462891,-0.1232014283\O,0.6609094716,-0.7269104578,-2.5239178  
688\O,-0.5701966116,-1.6405729452,-0.3373182595\C,-1.2109732509,2.3432

900871,0.0594388597\C,-1.8970367795,1.2795959869,-0.533248805\C,-3.242  
4327432,0.9292123522,-0.1959262853\C,-3.8809158634,1.6794415405,0.7827  
158672\H,-4.9192008535,1.4516897373,1.0450605384\C,-3.2106758111,2.720  
7073337,1.4864709059\C,-1.8471530661,3.0471260348,1.1461204932\C,-1.16  
95688459,4.0218565184,1.9397267474\H,-0.1214185923,4.2490406738,1.7257  
688392\C,-1.8128274372,4.6671981046,2.9859029649\H,-1.2673871841,5.403  
9821715,3.5858463983\C,-3.1695109561,4.3755854361,3.2907139562\H,-3.66  
80546556,4.8964801474,4.1153215261\C,-3.8500275481,3.4173809842,2.5560  
585356\H,-4.8885007903,3.1633824461,2.7971603591\C,0.1584981297,2.6988  
82681,-0.4117460496\C,1.1615938496,1.7223823338,-0.4351194912\C,2.5358  
767761,2.0271393973,-0.6805962828\C,2.8632224266,3.3364474481,-1.00849  
1801\H,3.9114124453,3.601784948,-1.1808395317\C,1.8684801289,4.3468245  
472,-1.1450072036\C,0.4928238964,4.0321959681,-0.8474345352\C,-0.48820  
11904,5.0529506662,-1.0346089742\H,-1.5409747228,4.8215264424,-0.84939  
18741\C,-0.1283183876,6.3215661611,-1.4651276673\H,-0.901212134,7.0842  
80322,-1.6109947265\C,1.2318999097,6.6380967061,-1.7261884244\H,1.5037  
141822,7.6452829222,-2.0604767779\C,2.2078037323,5.6663992416,-1.57092  
11901\H,3.2588045646,5.8918277173,-1.7851322632\C,-1.9438064406,-0.214  
050497,4.5960760143\C,-1.5770153254,-1.4395778309,5.1911489308\H,-2.0  
447102575,-1.7427132193,6.1343930322\C,-0.6264601636,-2.2759586934,4.5  
976011939\H,-0.3685292906,-3.222706694,5.081387538\C,-0.0405470835,-1.  
9260366474,3.3582938779\C,-0.3934089923,-0.6900578567,2.7637298581\H,0  
.0740808741,-0.3703234328,1.8288232879\C,-1.3178052863,0.1487063252,3.  
3828638639\H,-1.5665349771,1.1039749373,2.9119190745\C,0.9226474933,-2  
.8312669685,2.7147442911\C,1.7955597904,-3.7118548895,3.5561558765\H,2  
.7118988309,-4.0008746591,3.0194535197\H,1.2510872017,-4.6356214358,3.  
8255150954\H,2.0577625005,-3.1931637031,4.4908787591\N,1.0120664449,-2  
.8198022642,1.4035685366\H,0.3377058736,-2.2150562901,0.812741628\C,1.  
8769871276,-3.5882167533,0.561834554\C,2.5642909166,-2.899530908,-0.45  
53765718\H,2.4945435497,-1.8106687633,-0.526184421\C,3.3542990231,-3.6  
206804193,-1.357905934\H,3.8911852626,-3.0823957549,-2.1441636875\C,3.  
4602592423,-5.0166539785,-1.2498408992\C,2.7671293324,-5.6957606094,-0  
.2355739547\H,2.8354953011,-6.7856944571,-0.1549730699\C,1.9656292521,  
-4.9878198132,0.6708838793\H,1.3904517951,-5.517852799,1.4347790453\C,  
3.6056343534,0.9875067992,-0.5157262783\C,4.2693166661,0.4487914061,-1  
.6500285801\C,4.0026012242,0.5972479352,0.7935990831\C,5.3672452504,-0  
.4107579229,-1.4514266056\C,5.1036634954,-0.2662784138,0.9378885992\C,  
5.8188030824,-0.7601096883,-0.1672992613\H,5.8883002645,-0.8114307565,  
-2.328587953\H,5.4330478006,-0.5528656743,1.9430366618\C,-3.9293580585  
,-0.2029140833,-0.8967287373\C,-4.2425633086,-1.3968183427,-0.18757717  
55\C,-4.2805580863,-0.0808250351,-2.2681291486\C,-4.9274734817,-2.4258  
364459,-0.8583603405\C,-4.9573102575,-1.1441760255,-2.8950614473\C,-5.  
295769074,-2.3229686697,-2.211226076\H,-5.1702469725,-3.3421550274,-0.  
3080422876\H,-5.2354417384,-1.0503901872,-3.9521834021\H,4.0806804131,  
-5.5752097532,-1.9585213962\C,-2.9807652484,0.6889505446,5.2152582637\  
H,-3.8523852892,0.7897225959,4.5421029066\H,-3.3334141682,0.302087588,  
6.1852035995\H,-2.5779181245,1.7067173385,5.3659887307\C,-3.9761144291  
,1.1812877432,-3.0771829641\H,-3.4181959149,1.8754912235,-2.426730909\  
C,-3.8397017648,-1.6035857213,1.274040925\C,-6.027797513,-3.4580818717  
,-2.9216667181\H,-6.199041163,-3.1301281895,-3.9643023668\C,-5.0573096  
246,-1.5039275096,2.2159529487\H,-4.7465280191,-1.6326332026,3.2691156  
556\H,-5.5614032629,-0.525889466,2.1244280781\H,-5.8009086197,-2.28938  
76895,1.9845867314\C,-7.4061053065,-3.73625317,-2.2870649018\H,-7.3030  
552579,-4.0884071772,-1.2439260065\H,-8.033629276,-2.8270687045,-2.277  
3440821\H,-7.9443105409,-4.5183519813,-2.8536508218\C,-5.1715974457,-4  
.7405333887,-2.9690032235\H,-5.6872285086,-5.5328651928,-3.5423419997\  
H



H,-4.1940931546,-4.550506686,-3.4472752093\H,-4.9818806311,-5.13042140  
29,-1.951787543\C,-3.0799022367,0.8797346152,-4.2956311104\H,-3.592762  
8437,0.2263516711,-5.0254211686\H,-2.8131814825,1.8176692013,-4.816853  
5422\H,-2.1457840634,0.3857698358,-3.9797955545\C,-5.2758520638,1.9007  
497787,-3.4938684323\H,-5.0454069624,2.8401000453,-4.0295872938\H,-5.8  
880205038,1.2710255994,-4.1654530468\H,-5.8908445827,2.1520498244,-2.6  
108044567\C,7.0460374087,-1.6460791638,0.0359668846\H,7.2414101257,-1.  
6770685537,1.1245929312\C,3.8276826884,0.7935674175,-3.0736642026\H,2.  
8437018021,1.2874845027,-3.0000915047\C,3.2921067867,1.1494704644,2.03  
20695803\H,2.244892699,1.3493719544,1.7480555666\C,6.7958763383,-3.094  
4008396,-0.4307129855\H,7.6847569127,-3.7231428518,-0.2382643122\H,5.9  
379875657,-3.5419533173,0.100092452\H,6.5831030595,-3.1325587823,-1.51  
47268695\C,8.2952311346,-1.0519064096,-0.6455117936\H,8.1778234825,-1.  
0243885136,-1.7443629088\H,8.4880415412,-0.020818221,-0.2986955325\H,9  
.1886930631,-1.6624729884,-0.4197723981\C,3.2547104503,0.1573940422,3.  
2080309061\H,2.8897732262,-0.8327194261,2.8853159913\H,4.2513204727,0.  
020847958,3.6658367478\H,2.5789013883,0.5323333279,3.9969683557\C,3.91  
5985217,2.4926821044,2.4687069386\H,3.8891881812,3.2312216927,1.648588  
9312\H,3.3656860957,2.9158324172,3.3292710999\H,4.970974315,2.35332892  
56,2.7689643864\C,4.8111786757,1.780438928,-3.7369071596\H,4.912872197  
9,2.7084280509,-3.1470661714\H,5.8168832131,1.3304762482,-3.8344619808  
\H,4.4628060808,2.0561342056,-4.7494013493\C,3.6307431697,-0.463565517  
6,-3.9433325229\H,3.255743588,-0.1750515923,-4.942594271\H,4.577622586  
2,-1.0141212199,-4.0924571608\H,2.8863193815,-1.1344228953,-3.48514723  
92\C,-3.0873290834,-2.9324631439,1.4885074309\H,-3.7416297116,-3.80717  
44119,1.3173112868\H,-2.2218836374,-2.9984902929,0.8090768244\H,-2.718  
6654512,-2.9937493859,2.5284933069\H,-3.1421601782,-0.7937569529,1.542  
1042462\Version=ES64L-G09RevD.01\State=1-A\HF=-3216.1281091\RMSE=5.46  
5e-09\RMSF=2.648e-06\Dipole=1.0586791,-2.1603543,5.3634226\Quadrupole=  
-9.2668891,12.0313059,-2.7644168,-13.8670923,-5.8524785,-15.7736362\PG  
=C01 [X(C65H72N1O4P1)]\@

E-2a/1c (Type II; conf0)

1\1\GINC-LOGIN\FOpt\RTSPSS\def2SVP\W06\C65H72N1O4P1\JHIOE\31-Oct-20  
15\0\#p tpsstps/def2svp/w06 densityfit empiricaldispersion=gd3 opt s  
crf=(smd,solvent=ch2cl2,read)\title\0,1\P,-0.2953986811,-0.688130029  
4,-0.9302185863\O,-1.6018888406,0.2874744117,-1.3143601289\O,0.6930495  
261,0.4542612082,-0.1579349648\O,0.2594490128,-1.1782931261,-2.2337877  
527\O,-0.6657889326,-1.6249329102,0.2208221121\C,-1.4820970387,2.24418  
26293,0.0503291888\C,-2.1561965746,1.0829116291,-0.3332797708\C,-3.435  
32709,0.7085286887,0.1844875998\C,-4.0039787045,1.5295318785,1.1489081  
417\H,-4.995094822,1.2890188414,1.5467128656\C,-3.3183544237,2.6656421  
827,1.6667890555\C,-2.0289359098,3.0266302485,1.1305441613\C,-1.327846  
704,4.1159732678,1.7308756597\H,-0.3308103668,4.3763687041,1.362866645  
5\C,-1.8813227194,4.8278048984,2.785564092\H,-1.3189792332,5.651530074  
6,3.238876558\C,-3.1673969086,4.492951287,3.2885940982\H,-3.5952172355  
,5.0660916268,4.1183471088\C,-3.8682962725,3.431221167,2.7383781825\H,  
-4.8513534696,3.1478842377,3.1311289264\C,-0.2167944251,2.6225589485,-  
0.6416105747\C,0.8493991498,1.7176714266,-0.6908368825\C,2.1464733365,  
2.0800822962,-1.1736313432\C,2.3146457288,3.3498513133,-1.7079353154\H  
,3.306333867,3.6608696071,-2.0529253527\C,1.2297812912,4.2677089415,-1  
.8168042786\C,-0.0586750488,3.9064599296,-1.2785038757\C,-1.1362462891  
,4.8315978909,-1.4282335775\H,-2.1282292119,4.5600306426,-1.0558454281  
\C,-0.9470423664,6.0556274202,-2.0530367506\H,-1.7917181427,6.74449424  
73,-2.1643356523\C,0.3301675654,6.4207933869,-2.5568047837\H,0.4670479  
734,7.3923401763,-3.0441019298\C,1.3942540245,5.540089756,-2.442332586

2\H,2.3811260906,5.8032220262,-2.8400477517\C,3.9277841498,-4.46662501  
82,-0.738169701\C,4.6042785124,-4.2340883963,0.4762758215\H,5.64205054  
42,-4.5651083937,0.5889858142\C,3.9824377372,-3.5702481284,1.536357167  
6\H,4.5547716353,-3.4040684443,2.4519280599\C,2.647205994,-3.107022389  
,1.4238918123\C,1.9524744662,-3.3831317826,0.2165941458\H,0.9119638746  
, -3.0729360665,0.088361921\C,2.5838548003,-4.0397362309,-0.8363392117\  
H,2.0248721627,-4.2198188656,-1.7608834896\C,2.0264051345,-2.375563956  
9,2.537570835\C,2.7804145777,-2.2031655077,3.8234252713\H,2.3114438922  
, -1.4569717878,4.4780801813\H,3.8094153374,-1.8807629816,3.600965469\H  
,2.8431189956,-3.1645644182,4.3632569114\N,0.827733576,-1.8411916239,2  
.3939111322\H,0.330487947,-1.8202101875,1.4394499349\C,0.052231336,-1.  
1720800112,3.3928465147\C,-0.5068857016,0.0774120324,3.0654216138\H,-0  
.3160580942,0.515517004,2.0821876676\C,-1.3016146711,0.7407182396,4.00  
91699946\H,-1.7261971677,1.7180462765,3.7607015267\C,-1.5580413527,0.1  
5506103,5.2593614445\C,-1.018393525,-1.1044042824,5.567054286\H,-1.231  
017002,-1.5755903593,6.5324334258\C,-0.2135223956,-1.7747580861,4.6364  
276299\H,0.186142221,-2.7681808329,4.8592010092\C,3.3111371708,1.15350  
96826,-0.9807999143\C,3.7334143396,0.276033637,-2.0157830983\C,4.00112  
14713,1.1786879638,0.2577131524\C,4.8583939034,-0.5349543644,-1.791724  
3031\C,5.1270609488,0.3487521785,0.4325419913\C,5.5793603799,-0.509692  
3752,-0.5816577309\H,5.1907600978,-1.2148575758,-2.5845023177\H,5.6559  
402106,0.3836606552,1.3906252431\C,-4.1356353286,-0.5132947242,-0.3254  
558956\C,-4.342123228,-1.6309149124,0.52920607\C,-4.6159568176,-0.5472  
578054,-1.6651788268\C,-5.0617108349,-2.7369029115,0.0362047795\C,-5.3  
159428535,-1.6815894879,-2.1109452732\C,-5.5609235183,-2.785156778,-1.  
2748237529\H,-5.230467779,-3.5983791691,0.6937424736\H,-5.6861821653,-  
1.7005286229,-3.1427807995\H,-2.1867972214,0.6758780333,5.9892003207\C  
,4.6099180282,-5.1226303078,-1.9098218727\H,4.6926501515,-4.4059631329  
, -2.7489103675\H,5.6229668677,-5.4711817651,-1.6511832536\H,4.02150671  
61,-5.9814176564,-2.280730091\C,-4.4224581264,0.6218417879,-2.63324669  
38\H,-3.8389092044,1.4014215742,-2.116113424\C,-3.7901846774,-1.680893  
6092,1.9559301066\C,-6.3213485488,-4.0081420622,-1.77930585\H,-6.42409  
80743,-4.7015140074,-0.923404321\C,-4.9080593861,-1.4984121263,3.00328  
40436\H,-4.4861161943,-1.4943785736,4.0252655307\H,-5.4511154088,-0.54  
88151523,2.8550577743\H,-5.6459396537,-2.3204824845,2.9448481424\C,-5.  
5307781882,-4.7429363228,-2.8820441285\H,-5.402203024,-4.1023123807,-3  
.7739846125\H,-4.5260631979,-5.0319446517,-2.5252833941\H,-6.061295242  
4,-5.6603257203,-3.1972379615\C,-7.7410148687,-3.645341838,-2.26087623  
78\H,-8.2919555994,-4.5534334428,-2.5673115042\H,-8.3185879593,-3.1471  
797743,-1.4615816587\H,-7.7077268014,-2.9632291772,-3.1303033906\C,-3.  
6182139275,0.2006653222,-3.8801264321\H,-4.1653361057,-0.5505281524,-4  
.4794554542\H,-3.4317627406,1.0756211031,-4.5299997355\H,-2.6434684279  
, -0.2254373002,-3.5890901288\C,-5.7744110753,1.2565462521,-3.020145223  
3\H,-5.6162188245,2.1391953152,-3.6668600805\H,-6.4125392699,0.5434258  
493,-3.5741294827\H,-6.3309217843,1.5843846753,-2.1235664039\C,6.83226  
14309,-1.3747954796,-0.4425700299\H,6.5886971656,-2.3576215788,-0.8909  
900334\C,3.005044956,0.2398743592,-3.3599699745\H,1.967673219,0.567201  
9793,-3.1718651278\C,3.5541271675,2.0839703039,1.4080653661\H,2.644184  
4927,2.6162293367,1.0831039039\C,7.9911347044,-0.7694067889,-1.2672060  
571\H,8.8854907145,-1.4181450762,-1.2240915848\H,7.7098451102,-0.64591  
33799,-2.3279934363\H,8.2701604425,0.2252979071,-0.8726334887\C,7.2746  
015547,-1.6177010875,1.0088617011\H,7.6517141329,-0.6914520731,1.47981  
23728\H,6.4463451398,-2.0013338409,1.6288814437\H,8.0928611179,-2.3593  
399445,1.0374115738\C,3.1755601476,1.2665963507,2.6586643372\H,2.40738  
301,0.5158210664,2.4125018765\H,4.0506964915,0.7400665672,3.0807307396  
\H,2.7676537944,1.927035709,3.4456796654\C,4.6158910445,3.154506484,1.

7318174161\H,4.843373081,3.7708828813,0.8434533937\H,4.2580554942,3.82  
75889194,2.5325879008\H,5.5603754619,2.6933932079,2.0755786212\C,3.651  
7845765,1.2263576326,-4.3563033328\H,3.6636260236,2.2553084275,-3.9577  
713293\H,4.6967640136,0.9350901383,-4.5731610548\H,3.0941016033,1.2369  
79519,-5.3111684644\C,2.921356181,-1.1715908075,-3.9680635049\H,2.2743  
783552,-1.1546207046,-4.863777614\H,3.9120880931,-1.5475425148,-4.2845  
65515\H,2.4794130915,-1.8780833287,-3.2479134767\C,-2.9935567482,-2.97  
39228812,2.2226451359\H,-3.6399267452,-3.8702843153,2.1923027989\H,-2.  
1909311782,-3.0893610858,1.4763679249\H,-2.5317781648,-2.9319525109,3.  
2253016541\H,-3.0838563418,-0.8417728122,2.0661828876\\Version=ES64L-G  
09RevD.01\State=1-A\HF=-3216.1288254\RMSD=5.959e-09\RMSF=2.820e-06\Dip  
ole=2.8924951,-1.4919779,4.5697207\Quadrupole=0.4406009,0.554635,-0.99  
52359,-22.2197401,3.3011501,-8.0729528\PG=C01 [X(C65H72N1O4P1)]\@

E-2a/1c (Type II; conf1)

1\1\GINC-LOGIN\FOpt\RTPSSTPSS\def2SVP/W06\C65H72N1O4P1\JHIOE\31-Oct-20  
15\0\#p tpsstps/def2svp/w06 densityfit empiricaldispersion=gd3 opt s  
crf=(smd,solvent=ch2cl2,read)\title\0,1\p,-0.2772571275,-0.599183412  
,-1.0360614112\O,-1.5570661536,0.4191121977,-1.4006662813\O,0.70319595  
75,0.4772366402,-0.1657760999\O,0.3137427998,-1.0172412323,-2.34882173  
64\O,-0.6957637612,-1.5981534853,0.0438642701\C,-1.4408930409,2.298033  
2259,0.0694880858\C,-2.1235327275,1.1703936732,-0.3920369437\C,-3.4206  
929358,0.791807267,0.0752486622\C,-4.0016451502,1.5712080763,1.0669351  
501\H,-5.0061591326,1.3259980129,1.4265705143\C,-3.3138734393,2.670100  
3313,1.6570112351\C,-2.0051107643,3.0345187312,1.1726460019\C,-1.30239  
60309,4.0794977225,1.8452109896\H,-0.2915783918,4.339449818,1.51757815  
81\C,-1.8721969241,4.7497304487,2.9180735105\H,-1.3082500691,5.5401702  
008,3.4254459897\C,-3.1772928725,4.4146137855,3.3693613696\H,-3.618070  
5198,4.9552641769,4.2140070781\C,-3.8803316916,3.3931589443,2.74985654  
02\H,-4.8786704816,3.1095258545,3.1019632459\C,-0.147431271,2.68627279  
31,-0.5619745732\C,0.9028692306,1.7637587322,-0.6236788895\C,2.2232489  
206,2.1243263932,-1.0404498356\C,2.4354489163,3.41894835,-1.4937487849  
\H,3.4445803092,3.7283139289,-1.7856369978\C,1.3732088192,4.3645894719  
, -1.5865511023\C,0.0586920824,4.0007677631,-1.1176348869\C,-0.99555563  
46,4.9543103489,-1.2545164875\H,-2.0065495796,4.6808795333,-0.93852976  
03\C,-0.7586849291,6.2096287843,-1.7951674443\H,-1.5851955664,6.921557  
9418,-1.8975155204\C,0.5444852505,6.5777171026,-2.225055765\H,0.719165  
06,7.5745873278,-2.6444391357\C,1.5865383249,5.6694556766,-2.124376535  
7\H,2.5931383064,5.9353170113,-2.4669427153\C,3.9225744728,-4.48481318  
93,-0.8256743025\C,4.5001347385,-4.3980475686,0.4569075245\H,5.5024314  
78,-4.8054240722,0.6268106984\C,3.8282245835,-3.7793473319,1.513569372  
8\H,4.3259302561,-3.7275617957,2.4846230681\C,2.5385415214,-3.21917330  
89,1.3302633587\C,1.9388433299,-3.350761882,0.0496819669\H,0.932609681  
4,-2.9663935025,-0.1373458317\C,2.620012098,-3.9636866639,-0.99846472\H,  
2.1355616755,-4.0305099515,-1.9785001475\C,1.8748246039,-2.529241920  
9,2.4455058322\C,2.5612487963,-2.4415192745,3.7779068398\H,2.093823872  
1,-1.6903491142,4.4282068667\H,3.6184651266,-2.1729173216,3.6312853088  
\H,2.5340604071,-3.4200016454,4.2894375125\N,0.6970826641,-1.957253993  
8,2.2716835073\H,0.2444711661,-1.8782454266,1.2991313172\C,-0.10174962  
27,-1.3104393111,3.2673638007\C,-0.6061572591,-0.0286377764,2.97831107  
62\H,-0.3599835491,0.4492918672,2.0265128869\C,-1.4152948705,0.6176210  
124,3.9214725547\H,-1.7951533344,1.6202523243,3.7044792307\C,-1.741685  
9682,-0.015834654,5.1310543644\C,-1.2573537271,-1.3064261217,5.3989942  
159\H,-1.5242456356,-1.8141440868,6.3317919883\C,-0.4378035768,-1.9603  
978091,4.4696055734\H,-0.0813671279,-2.976498328,4.6609525941\C,3.3588  
144849,1.1587473434,-0.8678568691\C,3.8006250174,0.3429631015,-1.94456

15348\C,3.9981298477,1.0768466151,0.3949996218\C,4.8916766724,-0.51605  
98331,-1.7337727753\C,5.0882376593,0.1977055742,0.5568264914\C,5.55722  
62429,-0.6041297275,-0.4951473507\H,5.2390341728,-1.1482719355,-2.5589  
189416\H,5.5760057996,0.1479933767,1.5357140175\C,-4.1296560618,-0.387  
176246,-0.5173297553\C,-4.3626884464,-1.5535106091,0.2650609551\C,-4.5  
944039551,-0.3308687641,-1.8592926219\C,-5.0889593091,-2.6164292048,-0  
.3013270825\C,-5.3101260011,-1.4257542536,-2.3798995859\C,-5.577643163  
2,-2.5747073377,-1.618901317\H,-5.2713931718,-3.510675919,0.3055573771  
\H,-5.6765941914,-1.3804719063,-3.4130416494\H,-2.3816181166,0.4926070  
781,5.8598922021\C,4.6682911228,-5.0857175102,-1.9881798381\H,4.848039  
7677,-4.3168937225,-2.763218045\H,5.6416218198,-5.4999562942,-1.678939  
7107\H,4.0774344511,-5.8880716541,-2.4667099985\C,-4.3640432102,0.8890  
873027,-2.7535724329\H,-3.7792301411,1.6283292118,-2.1810428407\C,-3.8  
344181243,-1.6946595897,1.6948436949\C,-6.3621256179,-3.7428902288,-2.  
2097973495\H,-6.6400260656,-3.457446054,-3.2420024662\C,-4.9664850863,  
-1.5447101987,2.7324111944\H,-4.5612699027,-1.6026452151,3.7594684556\  
H,-5.4886697073,-0.5778053988,2.6263718594\H,-5.7181809205,-2.34805292  
42,2.6174331486\C,-7.6661066696,-4.0039940772,-1.4281534774\H,-7.45322  
53514,-4.3097712937,-0.3871190337\H,-8.298467186,-3.0987262909,-1.3928  
83904\H,-8.2508029482,-4.8135332151,-1.902533313\C,-5.4997269133,-5.01  
93502883,-2.2925977486\H,-6.0638043654,-5.8412795574,-2.77075362\H,-4.  
5821264342,-4.8437741215,-2.8820189561\H,-5.1953407218,-5.3602161617,-  
1.2858407249\C,-3.5380319659,0.5262490016,-4.0047724117\H,-4.083255358  
4,-0.1787314221,-4.6593793629\H,-3.320720341,1.4338138991,-4.597936952  
6\H,-2.578321078,0.0654588611,-3.7164517799\C,-5.6966783771,1.56821001  
06,-3.1312304363\H,-5.5109742905,2.4800451927,-3.7282394077\H,-6.33739  
17571,0.8971088173,-3.7323393023\H,-6.2636837878,1.8594809731,-2.22859  
37716\C,6.7637426357,-1.534835694,-0.3630981679\H,6.4754512406,-2.4915  
337478,-0.8414844351\C,3.1344828148,0.4250518706,-3.3184999657\H,2.103  
783433,0.7851432399,-3.155449889\C,3.5363186605,1.9205243557,1.5851749  
362\H,2.6642238705,2.5124820626,1.2593692408\C,7.9667452653,-0.9708660  
391,-1.1531653708\H,8.8232927043,-1.6688449126,-1.1144720742\H,7.71134  
58986,-0.8040779326,-2.2144860079\H,8.2928994043,-0.0042408614,-0.7264  
340967\C,7.1700433303,-1.8394631591,1.0867395596\H,7.577870536,-0.9437  
930868,1.5902813271\H,6.3162853453,-2.2054667297,1.682367381\H,7.95561  
84883,-2.6158926356,1.1055405256\C,3.0688467018,1.0352848629,2.7569758  
536\H,2.2851002168,0.3369835249,2.4227993005\H,3.9022178752,0.44353813  
44,3.1769782115\H,2.6510015174,1.6552928349,3.5711740628\C,4.623335319  
3,2.919940203,2.0284407004\H,4.918168605,3.5816042333,1.194185677\H,4.  
2525871705,3.5538348955,2.8548408208\H,5.5301240548,2.3974913196,2.385  
2397263\C,3.8677956851,1.4451444639,-4.2166152121\H,3.8950685138,2.447  
124562,-3.7548067234\H,4.9120356292,1.1274929181,-4.3968488155\H,3.363  
8310662,1.5343018536,-5.196831029\C,3.0239254651,-0.9383167969,-4.0239  
721597\H,2.4176990484,-0.8348291513,-4.9421974192\H,4.0124209778,-1.33  
15898625,-4.3254412838\H,2.5251147766,-1.673098674,-3.3726102655\C,-3.  
0734963099,-3.0196596902,1.9018253689\H,-3.7411567227,-3.8963185221,1.  
81181147\H,-2.2615966376,-3.1137193344,1.1627345183\H,-2.6282928693,-3  
.0455439729,2.9123679317\H,-3.1123776141,-0.8788302257,1.8642763009\\V  
ersion=ES64L-G09RevD.01\State=1-A\HF=-3216.1288923\RMSE=3.500e-09\RMSE  
=2.118e-06\Dipole=2.7055997,-1.8058762,4.6562416\Quadrupole=-0.6702615  
,2.8556223,-2.1853608,-22.5056812,1.7057,-8.9444242\PG=C01 [X(C65H72N1  
O4P1)]\@

E-2a/1c (Type II; conf2)

11\GINC-WORKER\FOpt\RTSSTPSS\def2SVP\W06\C65H72N1O4P1\JHIOE\01-Nov-2  
015\0\#p tpsstps\def2svp/w06 densityfit empiricdispersion=gd3 opt

scrf=(smd,solvent=ch2cl2,read)\title\0,1P,-0.273908124,-0.639177045  
9,-0.9176070852\O,-1.5952434505,0.3099447216,-1.3196742889\O,0.6694410  
809,0.5217828828,-0.1187704196\O,0.3240243179,-1.1080942874,-2.2098112  
907\O,-0.6514035879,-1.5891903612,0.219774817\C,-1.5493342787,2.248431  
4576,0.0748253162\C,-2.1843067218,1.0728178766,-0.3317482048\C,-3.4504  
548049,0.6451026954,0.1778757969\C,-4.0503655797,1.4332314209,1.150947  
0847\H,-5.0330795651,1.1524403247,1.5431751203\C,-3.405420804,2.583927  
607,1.6885486831\C,-2.1262677479,2.9956461214,1.1642594724\C,-1.462321  
9173,4.0955715238,1.7871729763\H,-0.4724582752,4.3937761494,1.42866609  
46\C,-2.0421670899,4.7705680099,2.8518504313\H,-1.507854213,5.60316086  
93,3.3225499006\C,-3.3188940357,4.3860849892,3.3431474928\H,-3.7677291  
003,4.930220563,4.1812789694\C,-3.9835192865,3.3126532657,2.7710043046  
\H,-4.9582519201,2.990996503,3.1549427723\C,-0.286403047,2.6699704735,  
-0.5967463913\C,0.8015407412,1.791563414,-0.6423074704\C,2.0932560465,  
2.1843348638,-1.1152896749\C,2.2380254328,3.4627632728,-1.6354023316\H  
,3.2246483557,3.7979513338,-1.9722916774\C,1.1356998657,4.3606861088,-  
1.73637161\C,-0.1499963626,3.9652240232,-1.2152012588\C,-1.2442139849,  
4.8714553187,-1.3587508563\H,-2.2334024092,4.5733905671,-0.9994365701\  
C,-1.07438808,6.1093952726,-1.9613670212\H,-1.931533868,6.7835022772,-  
2.067507349\C,0.1992491328,6.507686425,-2.4488101657\H,0.3209594217,7.  
4894273528,-2.9193995407\C,1.2791423404,5.6456308742,-2.3413028729\H,2.  
.263579825,5.9344365477,-2.7270401699\C,3.8862406501,-4.4830411679,-0.  
7918267083\C,4.5884172853,-4.2395829205,0.406355468\H,5.6256253636,-4.  
5774066291,0.5027837595\C,3.9921588202,-3.55929327,1.4709115518\H,4.58  
60763749,-3.3834149239,2.3711469278\C,2.6547543525,-3.0956678449,1.382  
4570425\C,1.9385361405,-3.3727782025,0.1878461442\H,0.8976688686,-3.05  
80605585,0.0754051096\C,2.5472610209,-4.0391216434,-0.872210791\H,1.97  
06117708,-4.2204263371,-1.7858249205\C,2.047120677,-2.3751793571,2.510  
8444287\C,2.8185609017,-2.2116356796,3.7877057779\H,2.3633665556,-1.46  
37336158,4.4503041945\H,3.8467344315,-1.895446229,3.5528354098\H,2.882  
0887212,-3.1746238003,4.3246617733\N,0.8424986088,-1.8476704395,2.3890  
94061\H,0.3399702756,-1.8121825792,1.4379259351\C,0.072845514,-1.19628  
38818,3.4032170909\C,-0.5255630986,0.0372969935,3.0837507946\H,-0.3669  
175761,0.4756923826,2.095008294\C,-1.3163431285,0.6843782682,4.0417950  
487\H,-1.7720170243,1.64886976,3.7976594699\C,-1.528891939,0.098662045  
2,5.3002947883\C,-0.9499851005,-1.1450451735,5.600837799\H,-1.12896395  
29,-1.6172494954,6.5724819282\C,-0.1496453959,-1.7995192718,4.65529729  
05\H,0.2773195675,-2.7825419386,4.8736444247\C,3.2734032594,1.27661698  
36,-0.9291718795\C,3.7492448822,0.4607043387,-1.9858353312\C,3.9263244  
827,1.2603574414,0.3331972583\C,4.9004272018,-0.3245332421,-1.77376648  
98\C,5.0586544369,0.4460770603,0.5010810934\C,5.576352496,-0.344397832  
1,-0.542509106\H,5.2657594029,-0.9429243264,-2.5981328116\H,5.55966963  
69,0.4315734809,1.4769965745\C,-4.0965986138,-0.6024192021,-0.34112186  
49\C,-4.264545452,-1.7298021047,0.5098083708\C,-4.5562294519,-0.656263  
9163,-1.6874320638\C,-4.9193758745,-2.8693276795,0.003190736\C,-5.1908  
731643,-1.8231886998,-2.1464578762\C,-5.3922049858,-2.9402381499,-1.31  
64005015\H,-5.0577176096,-3.7387305931,0.657319976\H,-5.546514364,-1.8  
569488165,-3.1830179538\H,-2.1539894261,0.6065293282,6.0422878621\C,4.  
532773395,-5.1757686648,-1.9631433834\H,4.6161011095,-4.4801810731,-2.  
8191853148\H,5.5414915928,-5.5441256216,-1.7161970914\H,3.9182299703,-  
6.0282571463,-2.3050561839\C,-4.4155254953,0.5281540206,-2.6455567882\  
H,-3.8746996851,1.3310547866,-2.1178041879\C,-3.7426189229,-1.75466422  
7,1.9484861916\C,-6.0892105591,-4.1954568341,-1.8339392254\H,-6.159182  
6018,-4.9012845215,-0.9849125419\C,-4.8911117297,-1.6261566694,2.97098  
07629\H,-4.4917788485,-1.6002062301,4.0017336551\H,-5.4772983594,-0.70  
46951138,2.8101878213\H,-5.5860685848,-2.4836789291,2.8982287393\C,-5.

2649113928,-4.880273091,-2.9437658525\H,-5.1674563305,-4.2249048554,-3.8288618155\H,-4.2476070482,-5.1257552613,-2.5901038142\H,-5.7518256225,-5.8180909081,-3.2690690793\C,-7.5241923303,-3.8950599143,-2.3132605538\H,-8.0310985599,-4.8235790109,-2.6341293252\H,-8.1261983195,-3.4364911354,-1.5083070064\H,-7.5215969046,-3.1989591277,-3.1721855485\C,-3.5870566976,0.1601174204,-3.8932074894\H,-4.0972462019,-0.6069897051,-4.5047732624\H,-3.4383175501,1.0513373899,-4.5304946956\H,-2.5949812717,-0.2246981591,-3.6035419752\C,-5.7968153858,1.0964700094,-3.0328267874\H,-5.6817154008,1.990751445,-3.6726652048\H,-6.3956865988,0.3550067278,-3.5934068627\H,-6.3716757426,1.3887197953,-2.1355191395\C,6.8434922817,-1.1683979567,-0.2998710966\H,6.6740095865,-1.7343835426,0.6378330168\C,3.049373087,0.4448418658,-3.346011166\H,2.0048992437,0.7581924548,-3.1726931091\C,3.4396074321,2.1233265993,1.4999379495\H,2.5079346716,2.6225143705,1.1843778678\C,7.1541484865,-2.1854099882,-1.4077982147\H,8.0101637097,-2.8187440259,-1.1137243237\H,6.2960608802,-2.8479689774,-1.608387824\H,7.4244832731,-1.6822414809,-2.3544346643\C,8.0584878232,-0.2429184261,-0.0639362831\H,8.2709988943,0.3574372811,-0.9679386415\H,7.8816671949,0.4553181508,0.7729885389\H,8.9606372117,-0.8363446289,0.1730259834\C,3.0996062306,1.2766013814,2.7405194998\H,2.3639057225,0.4976434121,2.4855084576\H,3.9965080555,0.7834354659,3.1569951219\H,2.6644924563,1.9094973427,3.5353797904\C,4.459039823,3.2317502366,1.8341170236\H,4.65733463,3.8687311045,0.9533681713\H,4.0791555022,3.8793489473,2.6457642239\H,5.4226300305,2.8021936758,2.1657505459\C,3.7021783605,1.4542230074,-4.3145333394\H,3.6895247366,2.4777235484,-3.9019883859\H,4.7556735226,1.1821188876,-4.5141064169\H,3.1643044308,1.4703197289,-5.2806234955\C,2.9940397738,-0.9593940278,-3.9754999771\H,2.3693410166,-0.9375840367,-4.8869387937\H,3.9957802292,-1.321494335,-4.2726073922\H,2.5426976512,-1.6797934549,-3.2749088564\C,-2.8924270931,-3.0080320172,2.2374283889\H,-3.4939664999,-3.9344407026,2.1912324703\H,-2.0640915054,-3.0852873803,1.5148059857\H,-2.4616828479,-2.9445008918,3.2525596487\H,-3.0800867724,-0.8830379563,2.0746201863\Version=ES64L-G09RevD.01\State=1-A\HF=-3216.128194\RMSD=5.202e-09\RMSF=5.425e-06\ Dipole=2.8358753,-1.5972804,4.5791249\Quadrupole=-0.2399068,0.8264343,-0.5865276,-22.2295538,4.0730532,-7.9592898\PG=C01 [X(C65H72N1O4P1)]\ @

### Z-configuration

#### Z-2a/1c (Type II; conf0)

1\1\GINC-WORKER\FOpt\RTSPSS\def2SVP\W06\C65H72N1O4P1\JHIOE\01-Nov-2015\0\#p tpsstps/def2svp/w06 densityfit empiricdispersion=gd3 opt scrf=(smd,solvent=ch2cl2,read)\title\0,1\P,-0.7881161067,0.159551728,-1.690068728\O,-2.1419846958,0.9699931365,-1.1245056325\O,0.3911135773,0.7583457809,-0.6191392296\O,-0.5934618898,0.6102244498,-3.106179937\O,-0.8663764429,-1.3130943639,-1.2876427036\C,-1.6016610808,1.8888461214,1.0066390326\C,-2.3731778268,1.0197229608,0.2347930461\C,-3.4334707899,0.224563718,0.7709174107\C,-3.6729075092,0.3092190306,2.1363868805\H,-4.4952591045,-0.2646950688,2.5755884857\C,-2.8575126094,1.1001909848,2.9960213631\C,-1.7892386463,1.8911695511,2.4353832865\C,-0.9299175547,2.5988716089,3.3292790364\H,-0.0890704771,3.168883285,2.9233083884\C,-1.1316917201,2.5524140962,4.7012435502\H,-0.451331549,3.0932203643,5.3682298836\C,-2.2076387844,1.8034246781,5.2493989433\H,-2.3593353752,1.7801611651,6.3340152602\C,-3.0508390303,1.0914717453,4.4105187909\H,-3.8705226485,0.491271111,4.8216026503\C,-0.5600932025,2.7323068562,0.3539329384\C,0.463340096,2.1154951411,-0.372369691\C,1.6474740538,2.8148174573,-0.7699276191\C,1.6747441333,4.193661125,-0.6057547347\H,2

.576106267,4.7493059286,-0.8860888107\C,0.5769535389,4.9050498097,-0.0385963993\C,-0.5492981412,4.166653676,0.4781535357\C,-1.6279097168,4.8944435268,1.0651698797\H,-2.4986292957,4.3464746583,1.4382270549\C,-1.5933903757,6.2787741042,1.1474877827\H,-2.4373149258,6.8175890338,1.5921653012\C,-0.4761648775,7.0040626755,0.6528415142\H,-0.4599094538,8.0969522962,0.72653743\C,0.5850812645,6.3280473926,0.0706283126\H,1.4490485871,6.8779004926,-0.3199033637\C,5.756105929,-4.2649721769,1.1874230821\C,5.0594869283,-3.1786918512,1.7636694308\H,5.4787297181,-2.6730248696,2.6407269114\C,3.8515279517,-2.7292228695,1.2315257455\H,3.3416873457,-1.8786561094,1.6898755167\C,3.3047753187,-3.3408861123,0.078548039\C,4.0066260918,-4.4126578424,-0.51631718\H,3.6050268458,-4.9069998647,-1.4057964098\C,5.2011600169,-4.8761847916,0.0450681258\H,5.7181613481,-5.723033997,-0.4193784304\C,2.0739278515,-2.821237389,-0.5455859145\C,2.0198019984,-2.6832233067,-2.0369328853\H,1.0433240189,-2.3041312916,-2.3702538538\H,2.216678429,-3.6615908983,-2.5097498646\H,2.8223813351,-1.9989603569,-2.365113948\N,1.0270263788,-2.4152334313,0.133103229\H,0.2423958202,-1.9348311784,-0.4466335623\C,0.7324729424,-2.5185370011,1.5263757387\C,0.062493086,-1.4341403391,2.1213267431\H,-0.180329982,-0.5532058065,1.5208340477\C,-0.2800482663,-1.4963588462,3.4784978361\H,-0.7878400562,-0.6451774055,3.9425102779\C,0.0167218119,-2.6442599754,4.2286300913\C,0.6519683215,-3.7384745825,3.6152514019\H,0.862717161,-4.6455359962,4.191501137\C,1.0126541044,-3.6842797827,2.2637683838\H,1.4931670184,-4.5387116153,1.7798924457\C,2.8783317066,2.0393647533,-1.1430914298\C,3.1433828247,1.6490375191,-2.4795331647\C,3.783894742,1.6920543437,-0.0985668848\C,4.3075356785,0.9026358321,-2.7476164933\C,4.9270924411,0.9371408424,-0.4176722191\C,5.2080020691,0.530742434,-1.7348563436\H,4.5284947075,0.602424248,-3.77809906\H,5.6216881318,0.6609325335,0.3830081282\C,-4.2700043371,-0.6418190999,-0.1206825448\C,-4.1882934992,-2.0600067419,-0.027920642\C,-5.1724387348,-0.0422678414,-1.0399485252\C,-5.0444952405,-2.8419507848,-0.8238017131\C,-5.9995618237,-0.8712331209,-1.8219772809\C,-5.9616872007,-2.2711368768,-1.723542774\H,-4.9869593494,-3.933573188,-0.7425595488\H,-6.7038979153,-0.4118499699,-2.526666417\H,-0.2576364297,-2.6933072474,5.2876665721\C,7.0771060361,-4.7189308382,1.7563261161\H,7.057718441,-4.7259999082,2.86021713\H,7.3500335575,-5.7250684274,1.397540541\H,7.8815591946,-4.0220130911,1.450959694\C,-5.2912272783,1.4753250348,-1.1902326977\H,-4.5608661945,1.9430542844,-0.508956317\C,-3.1888747696,-2.758480428,0.8967193172\C,-6.8869112268,-3.1446052712,-2.5670729376\H,-7.4911478984,-2.4643332834,-3.1964814923\C,-3.8839912327,-3.3436261452,2.1435591443\H,-3.1419874795,-3.8069579219,2.819681345\H,-4.4243459075,-2.5661263175,2.7110351862\H,-4.6161896994,-4.1218832355,1.8573117854\C,-7.8593875123,-3.9505459699,-1.6811445071\H,-7.3131019632,-4.6572739602,-1.0293719645\H,-8.4551930184,-3.2827532141,-1.0334042636\H,-8.5584450018,-4.538723142,-2.3036481036\C,-6.094394456,-4.0744900239,-3.5087159083\H,-6.7814996392,-4.6668534283,-4.1404988787\H,-5.429071996,-3.4961231481,-4.174315897\H,-5.4683219628,-4.783901639,-2.93681241\C,-4.9383268462,1.9351467516,-2.6198932927\H,-5.6621388408,1.5481430336,-3.3609552546\H,-4.9535324654,3.0390886504,-2.6820731768\H,-3.929551119,1.5895146743,-2.9026451064\C,-6.6862028599,1.9753605077,-0.7618515418\H,-6.7349564,3.0785008384,-0.8171434908\H,-7.4803712878,1.5694762618,-1.4150982838\H,-6.9131051968,1.6744489058,0.276904212\C,6.4766862598,-0.2494554731,-2.0718902299\H,6.4123474994,-0.5216911774,-3.1423510743\C,2.2223555164,2.0975222292,-3.6125574001\H,1.2109319966,2.2053097988,-3.1848325504\C,3.5132780547,2.0999264308,1.3538201997\H,2.8501699865,2.9807351513,1.3272900749\C,7.7308012922,0.6320488885,-1.8899285647\H,8.6410865084,0.0854284996,-2.1982154726\H,7.6629428459,1.5541750951,-2.4944096944\H,

7.8560282311,0.9282108957,-0.8318455076\C,6.59902597,-1.5548365165,-1.2616386821\H,6.6993855335,-1.3493966861,-0.1807611765\H,5.7158211853,-2.2013846822,-1.4023710285\H,7.4922110275,-2.1249136972,-1.5765535187\C,2.750080029,0.9876526292,2.1033049199\H,1.8698604722,0.6556814056,1.5307226545\H,3.4016564242,0.1105514823,2.2658030369\H,2.4047682954,1.3413649767,3.0917607461\C,4.7815920113,2.5125043958,2.1224729429\H,5.3428471839,3.2981861039,1.5854158856\H,4.507017528,2.9078347134,3.1171972964\H,5.4629127749,1.6579875816,2.2872822739\C,2.6705473085,3.4755497572,-4.1467151612\H,2.6829116295,4.2338793145,-3.3443894994\H,3.6885204814,3.4186338838,-4.5756268733\H,1.9839346937,3.8280926816,-4.9385491451\C,2.1085728151,1.0780976601,-4.75806296\H,1.3363345213,1.4073616525,-5.4756412708\H,3.0558066457,0.9721976303,-5.3189720095\H,1.8078415831,0.0875004141,-4.3786419461\C,-2.3814537623,-3.8477440587,0.1628014984\H,-3.0198243058,-4.6969683921,-0.1430830607\H,-1.895737052,-3.4291411765,-0.73312782\H,-1.5964478181,-4.2483523894,0.8292366834\H,-2.4678072683,-1.9966987768,1.2366137839\Version=ES64L-G09RevD.01\State=1-A\HF=-3216.1239436\RMSD=4.447e-09\RMSF=3.482e-06\Dipole=4.2498679,-3.6598844,3.5775537\Quadrupole=8.0788559,10.1302298,-18.2090857,-24.3519081,-2.3754396,3.9116415\PG=C01 [X(C65H72N1O4P1)]\@

Z-2a/1c (Type II; conf1)

1\1\GINC-WORKER\FOpt\RTSPSS\def2SVP\W06\C65H72N1O4P1\JHIOE\01-Nov-2015\0\#p tpsstps\def2svp/w06 densityfit empiricdispersion=gd3 opt  
scrfl=(smd,solvent=ch2cl2,read)\title\0,1P,-0.7962059675,0.184612933  
9,-1.6295546484\O,-2.1702058193,0.9036604801,-0.9928302892\O,0.3799341389,0.7739962157,-0.5507294319\O,-0.6529059184,0.7206804504,-3.0216768105\O,-0.803959009,-1.3101026207,-1.3099962204\C,-1.6246438123,1.7175716306,1.1798365272\C,-2.3761924823,0.8648138972,0.370874587\C,-3.3966864184,0.0002980212,0.8758303457\C,-3.6155262566,-0.0032807453,2.2471825362\H,-4.4091719928,-0.6311379478,2.6646179157\C,-2.8159437823,0.7685237192,3.138575228\C,-1.7873111294,1.6301130878,2.6089757223\C,-0.9404210225,2.3187203358,3.5291485745\H,-0.1291727744,2.943228997,3.1434271259\C,-1.1172223449,2.1866294256,4.8989835086\H,-0.4464021324,2.7140047163,5.5860966386\C,-2.1560072959,1.3680245103,5.4187957116\H,-2.288847992,1.2778950414,6.5024116045\C,-2.9860101912,0.6732133336,4.5528557817\H,-3.776332107,0.0205085803,4.9407105376\C,-0.6342713589,2.6429180173,0.5588708749\C,0.3968541124,2.1166469305,-0.2260369187\C,1.536625772,8922601862,-0.6115805216\C,1.509543831,4.2580922719,-0.362163333\H,2.3775767543,4.8697751159,-0.6308277533\C,0.3981710322,4.8839100421,0.2744122307\C,-0.683090396,4.0667568376,0.768151673\C,-1.779773323,4.7111667924,1.4163576503\H,-2.6201329654,4.1054772896,1.7690577246\C,-1.801805241,6.088311296,1.5822906147\H,-2.6589591552,6.5626927354,2.0727787958\C,-0.726196502,6.8898351393,1.1137444503\H,-0.7539872228,7.9758998477,1.2545163245\C,0.3494438783,6.2965360064,0.4711482967\H,1.1807813845,6.9056554003,0.0980482561\C,5.9603186269,-4.1494064837,0.895491953\C,5.2218186756,-3.138560183,1.5524835997\H,5.6295934565,-2.6731114837,2.4568711501\C,3.9867837618,-2.7129210806,1.0662854195\H,3.4463519168,-1.9190602672,1.5866894486\C,3.4508662832,-3.2712214205,-0.1191192591\C,4.1944806961,-4.2644499527,-0.794006512\H,3.8053393127,-4.7138878319,-1.7123332689\C,5.4188423409,-4.706047099,-0.2802842853\H,5.970334488,-5.4911143383,-0.8091137085\C,2.192237234,-2.7635412332,-0.6953304033\C,2.1114798524,-2.5440592694,-2.1759485396\H,1.1173087685,-2.1835651011,-2.4760342357\H,2.3384128608,-3.4857928927,-2.7059865292\H,2.8837013651,-1.8124596258,-2.4744143637\N,1.1424947006,-2.4296725292,0.0184615858\H,0.3347939938,-1.9432861625,-0.5235630676\C,0.8702906159,-2.6183198898,1.4074320336\C,0.1733739006,-1.5908084716,2.0693411943\H,-0.1



069652858,-0.6862419093,1.5223967976\C,-0.148710959,-1.7395842378,3.42  
48096885\H,-0.6779196451,-0.9329995909,3.9415112957\C,0.195038896,-2.9  
165476223,4.1067936287\C,0.8575601297,-3.9535201593,3.4265399152\H,1.1  
05301792,-4.8834363343,3.9491091358\C,1.1982636266,-3.8127122281,2.076  
1797864\H,1.7013118739,-4.6220875897,1.5404803602\C,2.7868195618,2.197  
6063854,-1.0685469179\C,3.0307868696,1.912443542,-2.4352503593\C,3.733  
6649535,1.8170526994,-0.0738254213\C,4.2148268603,1.232962589,-2.78298  
99821\C,4.8938174652,1.1287466851,-0.4716703291\C,5.1536321723,0.82501  
18072,-1.820522845\H,4.4186414958,1.013056753,-3.8369939915\H,5.618398  
945,0.8236900943,0.2912327306\C,-4.2208040099,-0.8365853502,-0.0547897  
018\C,-4.0830815998,-2.2513328215,-0.0664356816\C,-5.1689617709,-0.208  
4942537,-0.9093664698\C,-4.9276134741,-3.0072054284,-0.902962007\C,-5.  
9800701745,-1.0083311958,-1.7332103174\C,-5.8849606813,-2.4113019178,-  
1.7391418134\H,-4.8317795398,-4.0996938451,-0.9099611972\H,-6.71352586  
73,-0.5193523229,-2.3853362656\H,-0.0640267275,-3.0327744572,5.1644171  
408\C,7.301940447,-4.5867541371,1.4280149219\H,7.238850196,-4.84559982  
92,2.5003569884\H,7.6928989244,-5.4578094892,0.8772745738\H,8.03766430  
77,-3.7649894166,1.3395593348\C,-5.3518318996,1.3104022803,-0.94482818  
99\H,-4.6280251227,1.7575162368,-0.242900121\C,-3.0379277891,-2.971628  
7294,0.7881084407\C,-6.7804976568,-3.2620736038,-2.6359884382\H,-6.530  
9458722,-4.3206243982,-2.431768818\C,-3.6795101802,-3.6514735276,2.015  
5690728\H,-2.9061583924,-4.1398498539,2.6366401404\H,-4.2169291071,-2.  
9249601367,2.6493374329\H,-4.4040145732,-4.4266538725,1.702797737\C,-6  
.4999328472,-2.9950967348,-4.1295843031\H,-6.7362117606,-1.9491805134,  
-4.3991921315\H,-5.4382667641,-3.1767595776,-4.3746893002\H,-7.1177561  
954,-3.6547864765,-4.7664177396\C,-8.274676988,-3.0626645717,-2.308896  
8281\H,-8.9008656105,-3.7310778108,-2.9280463707\H,-8.4845436422,-3.28  
27438765,-1.2468203759\H,-8.5937159956,-2.0234568841,-2.5100958164\C,-  
5.0462208884,1.886358796,-2.3429602462\H,-5.7683619228,1.5226983106,-3  
.0974869324\H,-5.1072749207,2.9903702223,-2.3253948805\H,-4.0301637924  
,1.6041841863,-2.6670597176\C,-6.7582270649,1.7172636506,-0.4588160315  
\H,-6.8577098921,2.8181311,-0.4384620034\H,-7.5463681871,1.3201453469,  
-1.1246349949\H,-6.9514180824,1.3372263918,0.5605952051\C,6.4284165339  
,0.0945583532,-2.2356414103\H,6.378338113,-0.0435316633,-3.3322478437\  
C,2.0589693727,2.3930396908,-3.5113241089\H,1.0573868076,2.4281929507,  
-3.0495080355\C,3.4897929348,2.1144655089,1.4097570065\H,2.7760305402,  
2.9535142545,1.4632611498\C,7.6845482796,0.935578363,-1.9262047038\H,8  
.5958761472,0.4224154198,-2.2845054577\H,7.6334314832,1.9250881276,-2.  
4146809231\H,7.7951131498,1.0993923619,-0.8382622145\C,6.5245822093,-1  
.3026062887,-1.5905676741\H,6.6008198443,-1.2313274109,-0.4907372136\H  
,5.6375040054,-1.9148583626,-1.8277586813\H,7.4189246554,-1.8409282839  
, -1.9542920353\C,2.8213144265,0.911962699,2.1072754387\H,1.9423108828,  
0.5649890515,1.5416048339\H,3.5298113001,0.0687001834,2.1896072741\H,2  
.4914518922,1.1794449651,3.1276135117\C,4.7595250034,2.5522045792,2.16  
26050977\H,5.2523253626,3.4061631207,1.6637932603\H,4.5003926841,2.860  
3091573,3.1917788494\H,5.4966309998,1.7324251815,2.2427109205\C,2.4307  
371747,3.8204737934,-3.9687519428\H,2.4373211862,4.5270014572,-3.12038  
77784\H,3.4355628698,3.8364158139,-4.4309967909\H,1.704100315,4.190816  
0484,-4.7154447961\C,1.9538788644,1.443185534,-4.7161279264\H,1.143245  
0904,1.778533444,-5.3870565527\H,2.8855281809,1.4185536228,-5.31148851  
8\H,1.7127646776,0.4173113149,-4.3916024145\C,-2.216507599,-3.98953373  
04,-0.0280564672\H,-2.8320051653,-4.8479040423,-0.35457374\H,-1.778874  
5533,-3.5082406204,-0.9172430602\H,-1.3933477996,-4.390340802,0.590438  
1083\H,-2.332630643,-2.2072078206,1.1544705283\\Version=ES64L-G09RevD.  
01\State=1-A\HF=-3216.1239479\RMSD=2.527e-09\RMSF=4.181e-06\Dipole=4.4  
28176,-3.7096326,3.3179936\Quadrupole=9.589011,7.9948177,-17.5838287,-

25.1282264,-3.7225466,5.1459388\PG=C01 [X(C65H72N1O4P1)]\@

Z-2a/1c (Type II; conf2)

11\GINC-WORKER\FOpt\RTPSSSTPSS\def2SVP\W06\C65H72N1O4P1\JHIOE\01-Nov-2  
015\0\#p tpsstps\def2svp/w06 densityfit empiricdispersion=gd3 opt  
scr=(smd,solvent=ch2cl2,read)\title\0,1\p,-0.7676123827,0.194499547  
9,-1.650117495\O,-2.044234111,1.0901298303,-1.0386692588\O,0.445910937  
6,0.6415723985,-0.5512853515\O,-0.5383755627,0.6970892848,-3.043050722  
\O,-0.9521656052,-1.2879061433,-1.321791423\C,-1.4772690065,1.79581836  
78,1.169851827\C,-2.3011731543,1.0591299109,0.3159837585\C,-3.44243268  
21,0.3232259072,0.7643566472\C,-3.726683887,0.3399909342,2.123007208\H  
, -4.6119752619,-0.1856557649,2.4949594166\C,-2.8785744202,0.9970539193  
,3.0597346477\C,-1.7180477967,1.7135845923,2.5909467461\C,-0.830543572  
9,2.2656476584,3.5637089413\H,0.0784959299,2.7724854559,3.229526362\C,  
-1.0939119809,2.1525276182,4.9212419826\H,-0.3907817521,2.5761832485,5  
.6466940891\C,-2.2624518744,1.4864993478,5.3783928142\H,-2.4633092526,  
1.4104749993,6.4525672371\C,-3.1331866455,0.9173674473,4.4623933863\H,  
-4.0243250619,0.376439326,4.8003695957\C,-0.3432750546,2.5878667268,0.  
6134919861\C,0.6242118992,1.9567610299,-0.1776535267\C,1.8775189294,2.  
5724573302,-0.4949048115\C,2.0673634123,3.8958268829,-0.1244732469\H,3  
.0212382409,4.3855423882,-0.3453196726\C,1.0524205219,4.6434656617,0.5  
40300652\C,-0.1732740943,3.9863577234,0.9199078997\C,-1.1819863718,4.7  
608843665,1.5692972247\H,-2.1305612556,4.2848994705,1.8345517986\C,-0.  
9816693173,6.1042804782,1.8506937707\H,-1.7743103581,6.6800368624,2.34  
11361999\C,0.2392954411,6.7421138483,1.502344274\H,0.3870200997,7.8020  
459409,1.7364158035\C,1.2329036926,6.0236635322,0.8559297813\H,2.17434  
97544,6.5063360877,0.569619268\C,5.6167263017,-3.9556972874,1.57733744  
16\C,4.7816249733,-2.9529517955,2.1216559415\H,5.0725874153,-2.4524207  
445,3.0518982364\C,3.5928014425,-2.5837870923,1.494104459\H,2.97290637  
23,-1.7993624775,1.9337526228\C,3.2072796604,-3.1867204284,0.271697257  
1\C,4.0480494376,-4.1720979221,-0.2900513836\H,3.7766172288,-4.6587545  
137,-1.2313835446\C,5.2211344917,-4.560258839,0.3675291997\H,5.8481243  
159,-5.3418626279,-0.075023265\C,1.9985694502,-2.7277331431,-0.4397242  
265\C,2.0562398401,-2.4981496016,-1.9184299884\H,1.0698271065,-2.22799  
65215,-2.3211965693\H,2.4326763485,-3.4009861262,-2.4287474895\H,2.777  
3057297,-1.6859319066,-2.1241668965\N,0.8771700799,-2.4278841492,0.171  
5089134\H,0.1093479449,-1.951665285,-0.4344321936\C,0.5095011631,-2.63  
04213852,1.5379068449\C,-0.1533167676,-1.5795744305,2.1953173957\H,-0.  
3398021799,-0.6412377114,1.6664181921\C,-0.5571254105,-1.7485336168,3.  
5263857748\H,-1.0608460604,-0.9259370739,4.042926376\C,-0.3241777443,-  
2.9649114827,4.186172066\C,0.3113709551,-4.0203151823,3.5093420711\H,0.  
.4763050558,-4.9777559685,4.0146053494\C,0.7316180173,-3.8609393863,2.  
183460238\H,1.2161522585,-4.6823509595,1.6483597968\C,2.9789659973,1.7  
611719847,-1.1138453113\C,3.0870357575,1.675661021,-2.5290375327\C,3.9  
144096411,1.0785975568,-0.2856018096\C,4.1242773854,0.907062991,-3.090  
5617815\C,4.9270479169,0.3166840652,-0.9031808247\C,5.0559464539,0.217  
1910928,-2.2981825642\H,4.2151594578,0.8423149769,-4.1804407204\H,5.63  
79998417,-0.213960271,-0.2575829543\C,-4.3018688756,-0.4207234678,-0.2  
118709073\C,-4.3166839913,-1.8444549503,-0.2115554667\C,-5.1158059075,  
0.2971734733,-1.1286127065\C,-5.1719331992,-2.5139186106,-1.1048905733  
\C,-5.9474897537,-0.4215955731,-2.0083815417\C,-5.9971367572,-1.824536  
0265,-2.011615276\H,-5.1840636631,-3.6100501389,-1.1016641949\H,-6.579  
0314727,0.1290550201,-2.7168586561\H,-0.6463044399,-3.0952882547,5.224  
6712321\C,6.8981798908,-4.3456976722,2.2712160531\H,6.7071870296,-4.62  
8244945,3.3225149952\H,7.394142344,-5.1904431048,1.7657954238\H,7.6034  
897524,-3.4937798717,2.2916934062\C,-5.1288239612,1.8257102525,-1.1798

241743\H,-4.4098508514,2.1967981875,-0.4300427167\C,-3.4200660206,-2.6  
659404438,0.7178401886\C,-6.8939450244,-2.5745764178,-2.9929712775\H,-  
7.4577249459,-1.8128520915,-3.5642066476\C,-4.2178292219,-3.2580598002  
,1.8983178942\H,-3.5444325123,-3.8010810326,2.5871232578\H,-4.73501766  
5,-2.4726377787,2.4763329077\H,-4.9835339675,-3.9706984079,1.538284833  
1\C,-7.9183530028,-3.4719735049,-2.269617466\H,-7.415244578,-4.2664964  
251,-1.688265177\H,-8.54342646,-2.885854476,-1.5722485772\H,-8.5883618  
87,-3.9636701351,-2.9987463086\C,-6.0566795792,-3.3894374854,-4.000727  
8589\H,-6.7092215636,-3.8718213507,-4.7515320181\H,-5.3372885381,-2.74  
25093195,-4.5337011155\H,-5.4835802022,-4.1848068742,-3.4894544527\C,-  
4.66817441,2.3510748455,-2.5549899123\H,-5.3729020464,2.0593464868,-3.  
3553960431\H,-4.6115938111,3.4553394591,-2.5448280477\H,-3.6695940722,  
1.9567451051,-2.8073321161\C,-6.5119872442,2.3898601615,-0.7936230175\H,  
-6.4887000888,3.4951998068,-0.779913699\H,-7.2913036287,2.0785776197  
,-1.5134266979\H,-6.8177465417,2.0412096136,0.209477438\C,6.1762666377  
,-0.5993006494,-2.9370847395\H,6.0354605196,-0.53750818,-4.0325607782\C,  
2.134699222,2.4577212668,-3.4354512437\H,1.1718055405,2.5400452312,-  
2.9025821641\C,3.9815763904,1.1501093598,1.248874878\H,4.5951846717,0.  
2762720902,1.5347513337\C,7.5608985737,-0.0030809691,-2.6087568446\H,8  
.3614517797,-0.5667530268,-3.1222684606\H,7.6262634729,1.0527240049,-2  
.9271350037\H,7.7635242891,-0.0430151875,-1.5225055011\C,6.1049729784,  
-2.0860991994,-2.536551913\H,6.2608428255,-2.215543918,-1.4506244307\H,  
5.1236467101,-2.5220223675,-2.7920974903\H,6.88550049,-2.6685906475,-  
3.0596212241\C,4.7626063123,2.4012445248,1.7083763795\H,5.7502825814,2  
.4591023244,1.2172920499\H,4.2065199112,3.3249396292,1.4701861617\H,4.  
9231739552,2.3747659356,2.8022701927\C,2.6571793371,1.0216622811,2.026  
9434082\H,1.9899772296,0.2666036017,1.5815079603\H,2.8708646749,0.7167  
180068,3.067417898\H,2.1070503361,1.9751484148,2.0733395518\C,2.674774  
8542,3.8836207929,-3.6833403559\H,2.8263582524,4.4317241137,-2.7378644  
644\H,3.6448869409,3.8481508447,-4.2136014255\H,1.9669062391,4.4640061  
071,-4.3036658417\C,1.8419915056,1.7543744159,-4.7719014422\H,1.044019  
6858,2.295933157,-5.3106030002\H,2.7280612574,1.7328702797,-5.43329243  
79\H,1.4895579214,0.7238186372,-4.6056488419\C,-2.6580660017,-3.775883  
5291,-0.0332524335\H,-3.3382138691,-4.566019828,-0.4011896366\H,-2.108  
9488098,-3.3536681105,-0.8899420512\H,-1.9299022844,-4.2573218852,0.64  
43803216\H,-2.6632045378,-1.9803883691,1.1328636749\Version=ES64L-G09  
RevD.01\State=1-A\HF=-3216.1230459\RMSD=9.543e-09\RMSF=3.936e-06\Dipol  
e=4.2240919,-3.6393994,3.7143654\Quadrupole=8.190859,7.1964211,-15.387  
2801,-22.1103806,-1.4429095,2.4644772\PG=C01 [X(C65H72N1O4P1)]\@

Z-2a/1c (Type II; conf3)

1\1\GINC-LOGIN\FOpt\RTPSS\TPSS\def2SVP/W06\C65H72N1O4P1\JHIOE\01-Nov-20  
15\0\#p tpsstps/def2svp/w06 densityfit empiricaldispersion=gd3 opt s  
crf=(smd,solvent=ch2cl2,read)\title\0,1\P,-0.8166798526,0.0155588802  
,-1.630833863\O,-2.1807228347,0.8671760311,-1.1594872795\O,0.331144657  
8,0.6993999063,-0.5788491975\O,-0.5900200712,0.3630482362,-3.071584643  
7\O,-0.898132429,-1.424867239,-1.1248670147\C,-1.6830368518,2.02357477  
83,0.8658789284\C,-2.4378172334,1.0698863945,0.1800705676\C,-3.5115855  
912,0.3381448519,0.7775872305\C,-3.7826559141,0.575776686,2.1190414955  
\H,-4.6107092955,0.0470845912,2.6023468327\C,-2.9883964061,1.462832263  
6,2.901638089\C,-1.9089988078,2.1911141697,2.279988443\C,-1.0802501739  
,3.007583587,3.1079297133\H,-0.2339283482,3.5363282627,2.6606811685\C,  
-1.3192243935,3.1214394344,4.4697980092\H,-0.6618237777,3.7454384109,5  
.0851439242\C,-2.4034707071,2.4302485442,5.0740742155\H,-2.5851785414,  
2.5327158814,6.1494955902\C,-3.2177803788,1.6160240426,4.3025925721\H,  
-4.0454651155,1.0619090968,4.7598775915\C,-0.6142268707,2.779644915,0.

1514547869\C,0.4199854866,2.0734896396,-0.4710546947\C,1.6344777523,2.7045197611,-0.8929609439\C,1.6932192866,4.090936782,-0.8613527333\H,2.6170288522,4.5975889979,-1.1605927705\C,0.5920869958,4.8775011653,-0.4117775489\C,-0.572651377,4.2191386773,0.1282688204\C,-1.6546424257,5.0268962753,0.5916559172\H,-2.5538618234,4.5393919026,0.9805655909\C,-1.5871018259,6.4114327837,0.5363056671\H,-2.4341619387,7.0112572877,0.8871757891\C,-0.4319063728,7.0584709431,0.0207308946\H,-0.3897769441,8.1526112371,-0.0143212304\C,0.6336911749,6.3033724079,-0.4442170868\H,1.5271533964,6.7906680845,-0.850906914\C,6.0370818461,-3.5861072863,1.3182358443\C,5.2054753995,-2.5759943466,1.8525240544\H,5.5635274622,-1.9674574067,2.6903909121\C,3.9398409017,-2.3278848702,1.3236098398\H,3.3288613612,-1.5248810641,1.7404917308\C,3.4620822073,-3.0724833121,0.2191247193\C,4.2980310962,-4.0678664913,-0.3351081245\H,3.9562516572,-4.6580449839,-1.1901493315\C,5.5545143283,-4.3293287132,0.2213958722\H,6.1783107309,-5.1183506551,-0.2123234037\C,2.1680981983,-2.741498249,-0.4037868065\C,2.0597686069,-2.7245710218,-1.8980996291\H,1.0336118564,-2.5008423223,-2.2227843144\H,2.3764174852,-3.6984514279,-2.3104178325\H,2.7527108409,-1.9615008821,-2.2968925873\N,1.1017360294,-2.3808110839,0.2726105101\H,0.2762502913,-1.9926744222,-0.3152016375\C,0.8304490726,-2.4043655535,1.6736276879\C,0.0474022111,-1.3550464018,2.1885946361\H,-0.2768751497,-0.5499145929,1.5242663446\C,-0.3026373928,-1.3565960975,3.5450884853\H,-0.9068356555,-0.5355574623,3.9441016482\C,0.1085107505,-2.408514592,4.3779078264\C,0.8686863482,-3.4663301789,3.8479751608\H,1.1729630496,-4.299735697,4.4899148384\C,1.2311816985,-3.4739169384,2.4961091591\H,1.8038266493,-4.305891242,2.0775698553\C,2.8402698799,1.8475129362,-1.1477312582\C,3.116680373,1.3054997915,-2.426798272\C,3.6813068878,1.538648532,-0.0389990562\C,4.2023567589,0.4184128795,-2.5706581706\C,4.7437876444,0.6402486127,-0.2329746542\C,5.0130389289,0.0520180346,-1.4831395817\H,4.408833211,-0.0019629002,-3.5587427511\H,5.3791187315,0.3731524008,0.6185962547\C,-4.3028777194,-0.644946438,-0.0300256897\C,-4.2322724541,-2.0362553202,0.2663940663\C,-5.1347945793,-0.1893981143,-1.0888303503\C,-5.0147217499,-2.9320542127,-0.4837025498\C,-5.8899407063,-1.1295162257,-1.8152456271\C,-5.8505263765,-2.5036807648,-1.529915769\H,-4.9592871864,-4.001395092,-0.2492448367\H,-6.5363916721,-0.7782806901,-2.6290410614\H,-0.1709753514,-2.4123658851,5.4367078625\C,7.4184150777,-3.8211947319,1.8755786565\H,7.4300131896,-3.7265965699,2.9752579299\H,7.8044599272,-4.8160405828,1.5981411455\H,8.1217466759,-3.0650035786,1.4758489614\C,-5.2675793809,1.2932463007,-1.4430431394\H,-4.5775687519,1.861414743,-0.7970179006\C,-3.3167743815,-2.5932266957,1.3585322064\C,-6.6779408305,-3.4976666497,-2.3403755429\H,-7.2454840389,-2.9130661825,-3.0888443408\C,-4.1200704441,-3.0574223177,2.5908521067\H,-3.4381806393,-3.4112572391,3.3864406449\H,-4.734208319,-2.2395597071,3.0071364365\H,-4.7996533253,-3.8905306915,2.3309770481\C,-7.699310416,-4.245422606,-1.4588019936\H,-7.1921264228,-4.871667461,-0.701860673\H,-8.3614031073,-3.5392098012,-0.9264553467\H,-8.3323482347,-4.9099438891,-2.0752052658\C,-5.7783960748,-4.4891266934,-3.1071915502\H,-6.3890469988,-5.1654373489,-3.7333938189\H,-5.0694651747,-3.957305142,-3.7666378339\H,-5.1898073584,-5.1143056497,-2.4106699934\C,-4.8606007786,1.5733912393,-2.9037569421\H,-5.5462756132,1.0808156278,-3.6177581013\H,-4.8899580783,2.6596527964,-3.1078683683\H,-3.8357498467,1.2154548242,-3.0985393642\C,-6.6909670821,1.8105811644,-1.145373171\H,-6.762201814,2.8931733474,-1.3585043391\H,-7.4457653349,1.2941205851,-1.7668153491\H,-6.9592574781,1.6524397482,-0.0851100372\C,6.1763827885,-0.9318824056,-1.6051851821\H,6.1393576997,-1.5623189914,-0.6961234059\C,2.283538457,1.7237362417,-3.6371520204\H,1.2633358371,1.9313359366,-3.271032392\C,3.427775267,2.1490256952,1.3449641747\H,2.8

880219116,3.0975495647,1.1827728512\C,6.0825365098,-1.8676776012,-2.82  
02151652\H,6.8715159246,-2.6389937226,-2.7665388186\H,5.1071175677,-2.  
3831358024,-2.8620797445\H,6.2196830849,-1.3200550534,-3.7707423476\C,  
7.5294619493,-0.1869962151,-1.5903645351\H,7.6266557488,0.4660850892,-  
2.4774991847\H,7.6301356077,0.4452865939,-0.6903257207\H,8.3702025678,  
-0.9051023525,-1.5993483089\C,2.5105968473,1.2540446464,2.2053297286\H  
,1.605091327,0.95803297,1.6542110665\H,3.0369576281,0.3330517606,2.513  
2260937\H,2.1980762199,1.7830070766,3.1237085145\C,4.7224817023,2.4900  
6533,2.1055522872\H,5.3963710447,3.1200077243,1.497681793\H,4.48097074  
35,3.0428170654,3.0314783058\H,5.278937681,1.5826048124,2.4030181373\C  
,2.8532796031,3.0240197623,-4.2465380484\H,2.8843672667,3.8379423071,-  
3.5014128854\H,3.8830236509,2.8651688016,-4.6182506349\H,2.2311709446,  
3.3622339583,-5.0958759732\C,2.1511492592,0.6308330927,-4.7101325004\H  
,1.4320695718,0.9542242039,-5.4835277227\H,3.1118219907,0.4264791251,-  
5.2182877376\H,1.7704403067,-0.307357594,-4.2740621913\C,-2.4099234109  
, -3.7258635246,0.8371396576\H,-2.9926171939,-4.6202190081,0.549224578\  
H,-1.8345692187,-3.3834764674,-0.0380188824\H,-1.6989008108,-4.0327793  
673,1.6250397759\H,-2.6532390817,-1.7755484107,1.6826504436\\Version=E  
S64L-G09RevD.01\State=1-A\HF=-3216.1243248\RMSD=4.237e-09\RMSF=3.232e-  
06\Dipole=4.5321613,-3.1826639,3.6425749\Quadrupole=11.0306626,7.19329  
81,-18.2239607,-24.0420797,-0.7112539,2.699215\PG=C01 [X(C65H72N1O4P1)  
]\@

Z-2a/1c (Type I; conf0)

1\1\GINC-WORKER\FOpt\RTSPSS\def2SVP\W06\C65H72N1O4P1\JHIOE\31-Oct-2  
015\0\#p tpsstps\def2svp/w06 densityfit empiricdispersion=gd3 opt  
scr=(smd,solvent=ch2cl2,read)\title\0,1P,-0.9340637932,-0.08720244  
43,-1.4705138207\O,-2.251404428,0.8299136683,-0.996083992\O,0.29304005  
5,0.6684969477,-0.5685879305\O,-0.7933787212,0.1177798753,-2.948977614  
4\O,-0.9962795819,-1.4670307343,-0.8157171617\C,-1.6426839449,2.023946  
5707,0.9725275202\C,-2.4488982872,1.0720365854,0.3474539537\C,-3.51403  
85802,0.3827796516,1.0075837656\C,-3.7140399715,0.6550473949,2.3555933  
083\H,-4.534148431,0.1626331029,2.8888022324\C,-2.8616236107,1.5392739  
8,3.0792593286\C,-1.7957801759,2.2271335539,2.390797635\C,-0.913490889  
,3.0481856018,3.1564453856\H,-0.0760622133,3.5426189036,2.6555045462\C  
, -1.0931237714,3.2106696127,4.5225095664\H,-0.3979354288,3.838828961,5  
.0903859828\C,-2.1666855705,2.5642821674,5.192204055\H,-2.3022998951,2  
.7066485187,6.2699182085\C,-3.0284168314,1.7425967377,4.4827354374\H,-  
3.8480568186,1.2230400758,4.992182311\C,-0.6190969887,2.7605269146,0.1  
767580716\C,0.369139991,2.0451200088,-0.5085480208\C,1.5356108945,2.67  
58160295,-1.0473612215\C,1.5875120155,4.0631586953,-1.0473067094\H,2.4  
790518892,4.567735051,-1.4350049498\C,0.5252348197,4.8534451985,-0.519  
5525091\C,-0.5894173889,4.1998508852,0.1216470427\C,-1.6360813677,5.01  
22515513,0.6539290653\H,-2.5009727841,4.5296146809,1.1189128835\C,-1.5  
780289693,6.3958998135,0.5735972028\H,-2.3974664581,6.998192704,0.9811  
893201\C,-0.4689792772,7.0383162715,-0.0396668835\H,-0.4334003639,8.13  
19247866,-0.0933680957\C,0.5587098534,6.2790334676,-0.576987775\H,1.41  
52570265,6.7622814401,-1.0606649176\C,5.0083124262,-3.1014191224,3.741  
7252019\C,5.0387516221,-2.638632073,2.4059081635\H,6.0032234575,-2.480  
531465,1.9109487048\C,3.8636469102,-2.3750353175,1.7045991732\H,3.9240  
800361,-1.9945776049,0.6819124389\C,2.6016131223,-2.5446079003,2.32820  
30464\C,2.5658400647,-2.9709914476,3.6747843652\H,1.6070398395,-3.0982  
628008,4.1860007385\C,3.7511932227,-3.260576264,4.3591504482\H,3.70031  
31393,-3.6098033976,5.3962447147\C,1.3527888313,-2.1891129634,1.633404  
6787\C,0.2239801446,-1.5623753191,2.3961286719\H,-0.5506862359,-1.1944  
395868,1.708506082\H,0.5983888034,-0.7399046714,3.0265633648\H,-0.2250

969492,-2.3157548017,3.0688543447\N,1.1695932576,-2.354279442,0.345867  
7364\H,0.258432894,-1.9465806675,-0.0864297288\C,1.9843654975,-3.03211  
43591,-0.6138271751\C,2.2485375698,-2.3718428749,-1.8258973185\H,1.899  
8883777,-1.346646104,-1.9775400629\C,2.9919449968,-3.0290004055,-2.815  
3199601\H,3.2077233887,-2.5123184482,-3.7558827174\C,3.4630148192,-4.3  
329621055,-2.5970843348\C,3.1837246311,-4.9867509636,-1.3846833892\H,3  
.5386240103,-6.0089560773,-1.2162820555\C,2.4381854174,-4.3440669931,-  
0.3888470063\H,2.2012091426,-4.8505479959,0.5513248323\C,2.7293561156,  
1.8391943931,-1.4062490807\C,2.9146979743,1.3229421171,-2.7136740983\C  
,3.6807213646,1.5644271618,-0.3818495286\C,4.0461690826,0.5252116467,-  
2.9706285312\C,4.7839375238,0.7460560338,-0.6864139014\C,4.9842774839,  
0.2130879845,-1.9726469454\H,4.2048956614,0.1267309304,-3.9786941149\H  
,5.5127073819,0.5242266807,0.1001279279\C,-4.3741892637,-0.5807365274,  
0.2483296427\C,-4.3660038627,-1.9670925171,0.5751762846\C,-5.210658518  
4,-0.1092926593,-0.8015718668\C,-5.207734252,-2.8400216709,-0.13729569  
49\C,-6.0262733537,-1.0274668877,-1.4886996492\C,-6.0457922078,-2.3954  
405979,-1.174143667\H,-5.2006240199,-3.9050515559,0.1224597974\H,-6.67  
53707542,-0.6627513625,-2.2941414323\H,4.0446673639,-4.8428775748,-3.3  
721537672\C,6.2894332002,-3.4096544308,4.4751220265\H,6.9952025905,-2.  
5617294413,4.4118107097\H,6.1051239684,-3.6357052247,5.5379939253\H,6.  
7964224058,-4.2816379957,4.0203936997\C,-5.2891392721,1.3692730743,-1.  
1882153574\H,-4.5569999829,1.9225183452,-0.5772529914\C,-3.4611054457,  
-2.5512695889,1.6620958682\C,-6.95248188,-3.361484547,-1.9311272433\H,  
-7.4689479233,-2.7750207033,-2.7142228726\C,-4.2792087707,-3.016948557  
2,2.8843028163\H,-3.6094812686,-3.3867176897,3.6830614286\H,-4.8868777  
526,-2.1942387367,3.3012944475\H,-4.9672405794,-3.8393958119,2.6134374  
034\C,-8.032570137,-3.9584706622,-1.0049472799\H,-7.5761167036,-4.5663  
181681,-0.201986546\H,-8.6324695432,-3.1624141194,-0.5284708232\H,-8.7  
185791861,-4.612146092,-1.5746253692\C,-6.1467289132,-4.4732847548,-2.  
6335227747\H,-6.8163742049,-5.1229755469,-3.2264968808\H,-5.3886972605  
, -4.0471932633,-3.3147276135\H,-5.6221636785,-5.1125405607,-1.89952924  
35\C,-4.9163459785,1.5970413664,-2.6672131968\H,-5.6501196503,1.126328  
4207,-3.3474547129\H,-4.8974470202,2.6788613571,-2.8946387429\H,-3.918  
5483285,1.1822045142,-2.8867119609\C,-6.6788706854,1.9570257642,-0.862  
1585447\H,-6.7062601639,3.03718069,-1.0970739215\H,-7.4739920192,1.463  
621889,-1.4510852745\H,-6.9233979833,1.8338177539,0.2083717522\C,6.207  
6770075,-0.6404417796,-2.2987178035\H,6.0370814894,-1.0785952099,-3.30  
03381412\C,1.9320869324,1.6727503711,-3.8309165215\H,0.9481719776,1.83  
09827972,-3.3566517355\C,3.5045135199,2.1264854194,1.033822843\H,2.914  
3898306,3.0546242824,0.9422330542\C,7.4766472609,0.2352982364,-2.38021  
07014\H,8.3548904382,-0.3698102486,-2.6717110491\H,7.355221265,1.04469  
18851,-3.1221301202\H,7.6945141596,0.7020201249,-1.4016232118\C,6.4037  
639509,-1.8031664764,-1.3065481871\H,6.6336770354,-1.4321014572,-0.291  
3208534\H,5.5016206219,-2.4360961706,-1.2464060696\H,7.2477801834,-2.4  
425696755,-1.6233892506\C,2.6942026787,1.1590151401,1.923248555\H,1.74  
34130192,0.872576904,1.4471864371\H,3.2682619921,0.2357326676,2.112182  
4856\H,2.4648089124,1.6249234914,2.899043865\C,4.833157272,2.500598359  
6,1.7165653477\H,5.4470174977,3.1624575895,1.0796277216\H,4.6316471434  
,3.0300899401,2.6653318259\H,5.4363726555,1.6079821911,1.963823288\C,2  
.3534647569,2.9885068292,-4.5209413189\H,2.4224932192,3.8186364399,-3.  
7964861971\H,3.3412397167,2.8784706002,-5.0064266277\H,1.6194860391,3.  
27345864,-5.2973164887\C,1.7451968328,0.549171382,-4.8642284979\H,0.94  
52938415,0.8246592257,-5.5744102832\H,2.6623219447,0.3691130094,-5.454  
8353663\H,1.4436538161,-0.3917504923,-4.3755813328\C,-2.5733769327,-3.  
6911754623,1.1210874359\H,-3.1751406678,-4.5663456302,0.8142385076\H,-  
1.9893165158,-3.3428352312,0.2538801435\H,-1.8710158068,-4.0333857723,

1.9036282721\H,-2.7863160812,-1.7484408523,2.0004816947\Version=ES64L  
-G09RevD.01\State=1-A\HF=-3216.1216456\RMSD=5.883e-09\RMSF=3.873e-06\DI  
ipole=4.2404585,-2.8006632,4.6126408\Quadrupole=5.2311645,2.7992244,-8  
.0303888,-18.1847555,3.3166978,-8.1927265\PG=C01 [X(C65H72N1O4P1)]\@\

Z-2a/1c (Type I; conf1)

1\1\GINC-WORKER\FOpt\RTPSSSTPSS\def2SVP\W06\C65H72N1O4P1\JHIOE\31-Oct-2  
015\0\#p tpsstps\def2svp\w06 densityfit empiricdispersion=gd3 opt  
scrfl=(smd,solvent=ch2cl2,read)\title\0,1\p,-0.9603916882,-0.14192555  
16,-1.4145448894\O,-2.2937923313,0.734318966,-0.9079307935\O,0.2659287  
821,0.6562832469,-0.5481198525\O,-0.8688371361,0.061107523,-2.89709500  
66\O,-0.9585567758,-1.5205372345,-0.7546655317\C,-1.6727979144,1.95512  
93959,1.0400726571\C,-2.4637126007,0.9751343884,0.4394334874\C,-3.4865  
993364,0.2526748334,1.1303319784\C,-3.6601383198,0.5238729348,2.482266  
008\H,-4.4486756315,0.0058568749,3.0385120653\C,-2.8187311265,1.438835  
0964,3.1804065709\C,-1.7951316026,2.1585880225,2.4614381137\C,-0.92116  
50732,3.0122251903,3.2005502972\H,-0.115215161,3.5330793747,2.67560386  
8\C,-1.0692164709,3.1738760149,4.5704644424\H,-0.3807560553,3.82754964  
16,5.1173407247\C,-2.101616696,2.4940502208,5.2709493864\H,-2.21259945  
18,2.6356927512,6.3515778234\C,-2.9541629088,1.6413078867,4.5873880748  
\H,-3.7420505508,1.0966516627,5.1201498987\C,-0.6932513919,2.720689274  
9,0.216506625\C,0.2996050952,2.0346514201,-0.4921824331\C,1.4323008436  
,2.7001112095,-1.0605338504\C,1.4417863631,4.0884255032,-1.0623944608\  
H,2.3071228295,4.6194357469,-1.4735627378\C,0.3692981597,4.8467627642,  
-0.5090437558\C,-0.7094890527,4.1601249935,0.1583114653\C,-1.769045768  
9,4.940550149,0.7126914895\H,-2.6091470058,4.4320723454,1.1955000425\C  
, -1.7550234675,6.3252140637,0.6310039981\H,-2.5836158766,6.9023007716,  
1.0560863859\C,-0.6795417042,7.0007332608,-0.0059526155\H,-0.678206434  
5,8.0949241044,-0.059708146\C,0.3582991723,6.2727508812,-0.5667219016\  
H,1.1883945855,6.7817879224,-1.0697325253\C,5.2004208155,-3.0250042411  
,3.6425576078\C,5.1863514831,-2.5598366175,2.3072965971\H,6.1336525806  
, -2.3908437003,1.7833045709\C,3.9880406618,-2.3089943062,1.6412879305\  
H,4.0145105629,-1.9286442732,0.6172667652\C,2.7468500902,-2.4940897831  
,2.3011227884\C,2.7555882593,-2.9207610335,3.6479806191\H,1.8135834021  
, -3.0595213126,4.1868153701\C,3.9637527542,-3.1974412812,4.2967665638\  
H,3.9474060319,-3.547970644,5.3345320763\C,1.4725373809,-2.1625659817,  
1.641802139\C,0.3529149342,-1.5598303924,2.4366275417\H,-0.4480050231,  
-1.2068105017,1.7716706607\H,0.7274446937,-0.7306697357,3.0579924101\H  
, -0.0619823536,-2.3231869187,3.1197105752\N,1.2564572151,-2.3337889769  
,0.3604043301\H,0.3230545599,-1.9513119898,-0.0481910402\C,2.057246718  
6,-2.998027661,-0.6205485917\C,2.2831414743,-2.3322848702,-1.837319491  
1\H,1.9180726799,-1.3112166929,-1.9780909738\C,3.0095326036,-2.9787775  
3,-2.8462444606\H,3.1956153973,-2.4582359001,-3.791120851\C,3.50133789  
28,-4.2775639774,-2.6424694289\C,3.2602594862,-4.9368074736,-1.4248858  
288\H,3.6314944569,-5.9549445561,-1.2674517672\C,2.5322465319,-4.30470  
19364,-0.4094585057\H,2.3246889706,-4.814993753,0.5356525607\C,2.64149  
02848,1.9003943847,-1.4507276546\C,2.8059291398,1.3856395081,-2.761349  
2441\C,3.6317016372,1.6617769647,-0.4541659777\C,3.955846426,0.6254978  
124,-3.0494237243\C,4.7524026258,0.880210988,-0.7887780858\C,4.9331282  
947,0.3498704538,-2.0790197503\H,4.097891056,0.22868043,-4.0606557593\  
H,5.5118855366,0.6866550361,-0.0239581668\C,-4.3284943486,-0.747115530  
9,0.3980396781\C,-4.2575997979,-2.1285398091,0.7303086403\C,-5.2090676  
269,-0.3140736557,-0.6345383435\C,-5.0807757476,-3.037478364,0.0378728  
661\C,-6.0021536064,-1.2644359317,-1.3000004923\C,-5.9583648883,-2.632  
8340971,-0.97966004\H,-5.0296596373,-4.1027325631,0.2943345483\H,-6.67  
97030525,-0.9217058524,-2.0906730476\H,4.0692966679,-4.7792182576,-3.4

329440334\C,6.5053350523,-3.3244606277,4.3364451026\H,7.2071291631,-2.475984841,4.2442552655\H,6.3559675207,-3.543604065,5.4062959985\H,6.9988255468,-4.1990257821,3.8717129947\C,-5.3556007075,1.1591448746,-1.0236118557\H,-4.6335114901,1.7451860148,-0.4311265934\C,-3.3077630412,-2.6708989056,1.7999186443\C,-6.8125174843,-3.6517421718,-1.7287756145\H,-6.6665065028,-4.6268346316,-1.2269134725\C,-4.0802726887,-3.1505692367,3.0464371084\H,-3.3794378572,-3.4931917128,3.8304378942\H,-4.7015053221,-2.3427476817,3.4723403951\H,-4.7496964864,-3.9955509222,2.7994474389\C,-6.339187423,-3.801752377,-3.1901274026\H,-6.4589771131,-2.8527107454,-3.7451302489\H,-5.2731417128,-4.0876116905,-3.2353386377\H,-6.9261968954,-4.5780342609,-3.7148757027\C,-8.3147397644,-3.3111741529,-1.662234861\H,-8.915036775,-4.1046952243,-2.1437290016\H,-8.6549766267,-3.2108258066,-0.6159216899\H,-8.5359189849,-2.3621281805,-2.1842159273\C,-5.0251441065,1.3954773605,-2.511412124\H,-5.7535226746,0.8918995571,-3.1736797595\H,-5.0553426937,2.4761638257,-2.7430810497\H,-4.0162609525,1.0208365883,-2.7515233494\C,-6.7613638159,1.6887172283,-0.6689133542\H,-6.8418503308,2.7648805705,-0.9094205753\H,-7.5471193745,1.1565529627,-1.2362610032\H,-6.9755853934,1.5617079772,0.4076364139\C,6.1754462192,-0.4621806442,-2.4362821044\H,6.004689611,-0.8859385851,-3.4440056214\C,1.7800497671,1.6948259717,-3.8513520135\H,0.8063214497,1.8299086437,-3.3496989631\C,3.4755265452,2.2156816369,0.9667526824\H,2.8478887569,3.1206285995,0.8954918203\C,7.419074427,0.4492905159,-2.5148061378\H,8.3091151099,-0.1256235644,-2.8305159099\H,7.2660874307,1.271213018,-3.2368174661\H,7.6375837332,0.900281993,-1.5290383536\C,6.4146374311,-1.6379994633,-1.468738855\H,6.6388660793,-1.280115614,-0.4473965259\H,5.5331229232,-2.300026018,-1.4169541592\H,7.2764320906,-2.2433274544,-1.8042327075\C,2.7281889645,1.2149975578,1.8741303185\H,1.7742653488,0.8978979391,1.4242299969\H,3.3401352726,0.3114231682,2.0396473974\H,2.511446768,1.6674408036,2.8591646467\C,4.807809555,2.6389239845,1.6124501553\H,5.3754140261,3.3284361323,0.9619797871\H,4.6133094862,3.1549111819,2.5700656843\H,5.4532238255,1.7699416165,1.8361591657\C,2.1403400988,3.0145371586,-4.5676150634\H,2.201703618,3.8556058183,-3.8550873124\H,3.1176578246,2.9305291015,-5.0787968711\H,1.3768862463,3.2661886591,-5.3268845286\C,1.5969844047,0.5534317528,-4.8657629506\H,0.7675080462,0.7949499895,-5.5539643233\H,2.5012550208,0.3943724846,-5.4816550561\H,1.3393131993,-0.3894617245,-4.3563578244\C,-2.3942586498,-3.7860800253,1.2504848269\H,-2.970655633,-4.6889949242,0.9774923456\H,-1.8502203319,-3.4320909112,0.3599384367\H,-1.6558893452,-4.0868985014,2.0166012884\H,-2.6536039064,-1.8415603659,2.1138336781\\Version=ES64 L-G09RevD.01\State=1-A\HF=-3216.1217998\RMSD=5.808e-09\RMSF=3.771e-06\ Dipole=4.4394202,-2.6783232,4.5048046\Quadrupole=5.8602126,2.1479973,-8.0082099,-18.8575981,3.62146,-8.0502377\PG=C01 [X(C65H72N1O4P1)]\@\

Z-2a/1c (Type I; conf2)

1\1\GINC-LOGIN\FOpt\RTPSSSTPSS\def2SVP/W06\C65H72N1O4P1\JHIOE\01-Nov-2015\0\#p tpsstps/def2svp/w06 densityfit empiricaldispersion=gd3 opt s crf=(smd,solvent=ch2cl2,read)\title\0,1\P,-0.8666742064,-0.2661341712,-1.342714654\O,-2.228260908,0.6711423586,-1.0780595541\O,0.2835149739,0.6179150312,-0.4582165632\O,-0.6113217344,-0.2449191616,-2.8209800844\O,-0.9780117878,-1.5636955413,-0.542077618\C,-1.7606525409,2.1049925544,0.7673429042\C,-2.5070104591,1.0633139631,0.2171163662\C,-3.5825646284,0.4168107833,0.9026200379\C,-3.8595630309,0.8340226907,2.1983767132\H,-4.6923693633,0.379136014,2.7445002959\C,-3.0745444495,1.8261627066,2.8541507963\C,-1.9968056204,2.4691563871,2.1416597592\C,-1.1868753773,3.4113350642,2.8454786668\H,-0.341970981,3.877538427,2.3305104962\C,-1.4464238813,3.7274205803,4.1712667741\H,-0.8063887998,4.447714983



6.4.6927485364\C,-2.5307395649,3.1203548827,4.8603876571\H,-2.72929205  
93,3.3838756277,5.9049983927\C,-3.3237901317,2.1860704823,4.2131109689  
\H,-4.1518833991,1.6976465107,4.7393603065\C,-0.7034719135,2.765732506  
2,-0.0510151\C,0.3395821179,1.992809948,-0.5750588946\C,1.5258757113,2  
.5812266144,-1.1210534007\C,1.5490331233,3.9592995009,-1.2935851041\H,  
2.4535291094,4.4345087762,-1.6884634634\C,0.4425464218,4.7829772844,-0  
.9366585336\C,-0.6985561907,4.1858667321,-0.2877940107\C,-1.7929175198  
,5.0306738517,0.0702559695\H,-2.67774469,4.5880935981,0.5378447147\C,-  
1.7550542568,6.3940896687,-0.1822824703\H,-2.6107023605,7.0209760655,0  
.0920845654\C,-0.6196759321,6.9838543528,-0.8005561462\H,-0.6010338572  
,8.0626319608,-0.990363212\C,0.454839415,6.190665401,-1.1716747248\H,1  
.3322439706,6.6323679057,-1.6578870368\C,5.3389500435,-2.117706459,3.6  
802260823\C,5.2089195836,-1.9076611953,2.2879440172\H,6.1035079044,-1.  
7170082251,1.6845789908\C,3.9610934455,-1.9262091514,1.6679631284\H,3.  
8908974061,-1.7275602517,0.5958046353\C,2.7849421325,-2.1392543665,2.4  
286485494\C,2.9037903793,-2.3155558457,3.8249514255\H,2.0096594244,-2.  
4684880348,4.4369973806\C,4.1642466048,-2.3246309328,4.4321206743\H,4.  
2380085108,-2.4858309934,5.5132255376\C,1.4598465471,-2.0418320877,1.7  
983890045\C,0.3308507063,-1.389465357,2.5398858986\H,-0.4878326563,-1.  
1301152915,1.8531076782\H,0.679914019,-0.496636011,3.0798660524\H,-0.0  
546466985,-2.1038551209,3.292140373\N,1.1994282264,-2.4662091096,0.582  
5252286\H,0.2652864783,-2.1233266232,0.1474088819\C,1.970631779,-3.288  
8276311,-0.2918389809\C,1.9181656231,-3.0021722735,-1.6688927316\H,1.3  
297674146,-2.1546670529,-2.0309672002\C,2.6243346155,-3.8117827254,-2.  
5681205444\H,2.5924931884,-3.5785766426,-3.6372975408\C,3.3660311224,-  
4.9078544196,-2.1025060599\C,3.3911200584,-5.2021590218,-0.7281956395\  
H,3.9511191511,-6.0688403357,-0.3615073599\C,2.6929888152,-4.400972609  
3,0.1824500543\H,2.6975530431,-4.6391822922,1.2496594222\C,2.764493058  
,1.7506300211,-1.3027970175\C,3.0310467209,1.0532188807,-2.5112882581\  
C,3.6798671831,1.6760094361,-0.2154645324\C,4.1918469942,0.2633122233,  
-2.5964072073\C,4.8294198657,0.8748394982,-0.3547618055\C,5.10048266,0  
.1531721654,-1.5282026795\H,4.3943868198,-0.2811484839,-3.524446148\H,  
5.5346159496,0.8016929364,0.4802493991\C,-4.3883073244,-0.6493484854,0  
.2258995852\C,-4.34093477,-1.9945682392,0.6904599714\C,-5.2252623543,-  
0.3094164287,-0.8719003052\C,-5.1564404493,-2.9573747169,0.0692826119\  
C,-6.0140745464,-1.3135938804,-1.4643563587\C,-6.0027064996,-2.6411022  
298,-1.0079924877\H,-5.1213163642,-3.9903131823,0.4344443563\H,-6.6667  
434467,-1.0526068737,-2.3068252938\H,3.9174152507,-5.538016616,-2.8080  
863755\C,6.6994843841,-2.1051899547,4.3307906051\H,7.1893568805,-1.123  
3194194,4.1923610781\H,6.6367753526,-2.3119051351,5.411600465\H,7.3615  
682601,-2.8599431492,3.8678204359\C,-5.3268765801,1.1188303948,-1.4107  
206568\H,-4.6209272777,1.7485329655,-0.8445297121\C,-3.4188797981,-2.4  
331847897,1.8307013984\C,-6.8775953678,-3.7038332134,-1.6668078497\H,-  
7.4269078347,-3.206382011,-2.4881074634\C,-4.2130400127,-2.7154763689,  
3.1232426798\H,-3.5281092926,-2.9837042653,3.9491325719\H,-4.800494984  
4,-1.835741664,3.4395908561\H,-4.9166663105,-3.5567516361,2.9802320506  
\C,-7.92028158,-4.2698387234,-0.681112617\H,-7.4302370126,-4.790623054  
,0.1623544279\H,-8.5523512757,-3.4659909218,-0.262988762\H,-8.58074547  
88,-4.997409793,-1.1877237796\C,-6.029683384,-4.8331472569,-2.28689769  
49\H,-6.6745454676,-5.5609270016,-2.8130012685\H,-5.3003338211,-4.4316  
537033,-3.0128373541\H,-5.4674916054,-5.3829728049,-1.5098523427\C,-4.  
9196225526,1.2004509896,-2.8959610226\H,-5.6177880777,0.6344728565,-3.  
5399488527\H,-4.926265175,2.2517116933,-3.2385219297\H,-3.9032069556,0  
.7979479098,-3.0434547162\C,-6.7347947371,1.7040430798,-1.1742011297\H  
,-6.7791371008,2.7556141457,-1.5128117721\H,-7.5069515725,1.1385194758  
,-1.7277803911\H,-6.9990057878,1.6787212405,-0.1014808265\C,6.35206396

54,-0.7142198974,-1.637094686\H,6.8795630535,-0.6405702081,-0.6671614274\C,2.1077415772,1.2184744409,-3.7180152225\H,1.0870885864,1.3671382728,-3.3264509561\C,3.4164963386,2.4141771849,1.1014431475\H,2.783872809,3.2869269445,0.8660790448\C,5.9982337363,-2.197373404,-1.8674767303\H,6.9112806049,-2.8206090483,-1.875514907\H,5.3309200091,-2.5780617444,-1.0752241592\H,5.4856881565,-2.3397572528,-2.8358499314\C,7.3070504478,-0.1929433336,-2.7303433408\H,6.837458529,-0.2511241183,-3.7294908898\H,7.5855865358,0.8602326507,-2.5468064971\H,8.2346858963,-0.7937964147,-2.7595112647\C,2.6164259544,1.5252583564,2.0775184946\H,1.7161850186,1.1148307047,1.5925847961\H,3.2306768635,0.6759637655,2.4247232425\H,2.297515826,2.1040145105,2.9637739316\C,4.6935991293,2.9501719807,1.7720570356\H,5.2884063058,3.56816464,1.0754835773\H,4.4274158219,3.57702598,2.642298541\H,5.3408650855,2.13425425,2.1426792569\C,2.5052509624,2.4735300271,-4.5261997399\H,2.4768479419,3.3842346592,-3.9035481865\H,3.5297116137,2.3717245103,-4.9308546939\H,1.8137205523,2.6212907175,-5.3762464913\C,2.0537691209,-0.0142593386,-4.6357654334\H,1.2714940261,0.1256694587,-5.4026609501\H,3.0095928742,-0.1791567368,-5.1673483656\H,1.8047826098,-0.9258105236,-4.068518974\C,-2.5566783942,-3.6509615014,1.440176736\H,-3.171333221,-4.5599846864,1.305945828\H,-2.0094530371,-3.4515622957,0.5050766734\H,-1.8198041371,-3.868545605,2.2352773738\H,-2.73023371,-1.5974411353,2.0361029773\Version=ES64L-G09RevD.01\State=1-A\HF=-3216.1212309\RMSD=3.633e-09\RMSF=3.332e-06\Dipole=4.1742766,-2.23304,4.5535374\Quadrupole=7.4528551,-0.3721628,-7.0806923,-17.4299997,7.6444593,-5.7409684\PG=C01 [X(C65H72N1O4P1)]\@

## Solution Phase pome-ketimine/TRIP

### *E*-configuration

E-2b/1c (Type I; conf0)

1\1\GINC-LOGIN\FOpt\RTSPSS\def2SVP\W06\C65H72N1O5P1\JHIOE\05-Nov-2015\0\#p tpsstps/def2svp/w06 densityfit empiricaldispersion=gd3 opt s crf=(smd,solvent=ch2cl2,read)\title\0,1\P,0.0361088136,-0.4884509716,-1.3308205849\O,-1.3291085046,0.4478853205,-1.6004119637\O,0.8380624978,0.5116515464,-0.2163146518\O,0.7492074399,-0.570116471,-2.6485998088\O,-0.3033291775,-1.7069841789,-0.4793752761\C,-1.3621036321,2.2648372686,-0.0363916456\C,-1.9698806537,1.1338772953,-0.5924995979\C,-3.292076083,0.7109877254,-0.2426554307\C,-3.9863988713,1.4574051261,0.7007966887\H,-5.0112851524,1.174122105,0.9626552543\C,-3.3947559478,2.5708399291,1.3618884465\C,-2.0476222054,2.9599378849,1.0268406493\C,-1.4423518988,4.007215537,1.7865212907\H,-0.4032666239,4.2817161408,1.5846217757\C,-2.1463027287,4.6712377021,2.7805726758\H,-1.6561625971,5.4665223696,3.3528787765\C,-3.4950671994,4.3266339073,3.0653452454\H,-4.0441315265,4.8668359465,3.8441118856\C,-4.1010939054,3.2909116574,2.3727710197\H,-5.130212572,2.9927517939,2.6032131357\C,-0.0310540611,2.723252272,-0.526395825\C,1.0501526402,1.836568598,-0.5375143619\C,2.3957403696,2.252851343,-0.7837065271\C,2.6132856453,3.5804439328,-1.1258544463\H,3.6356504805,3.9306865467,-1.3021708489\C,1.5362248821,4.5011111345,-1.2772180026\C,0.1904716952,4.0741708794,-0.9822912351\C,-0.8729013633,5.0045971112,-1.1884138697\H,-1.9031827594,4.6854220959,-1.0059185778\C,-0.619789178,6.2942536575,-1.6321422164\H,-1.4537274803,6.9865176672,-1.7924441969\C,0.7102364273,6.7231855186,-1.8879756006\H,0.8972615404,7.7463263349,-2.2318986568\C,1.7644357897,5.8400554163,-1.7165706775\H,2.7936886153,6.1520679795,-1.9276327691\C,-1.5897869432,-0.7536397034,4.4924270742\C,-0.9909163651,-1.9058983503,5.0579878088\H,-1.3635679922,-2.2725946824,6.0190445706\C,0.0436842068,-2.5543381226,4.39511

9138\H,0.4827410544,-3.4488511958,4.8469384638\C,0.488098163,-2.101286  
2795,3.1234216631\C,-0.1021210643,-0.9320674545,2.5837366084\H,0.24975  
59146,-0.5220969982,1.6347357099\C,-1.113858573,-0.2526053599,3.258568  
3621\H,-1.5307610659,0.6554571637,2.8170848879\C,1.5313865845,-2.83507  
16967,2.4073220587\C,2.5733817548,-3.5915111423,3.1787327007\H,3.50991  
83035,-3.6696340932,2.6042421093\H,2.2243282672,-4.6162874116,3.401268  
6449\H,2.7701478203,-3.0856313878,4.1357158256\N,1.5491537882,-2.79450  
64785,1.0885463019\H,0.776248624,-2.2652153069,0.5593050893\C,2.448323  
2472,-3.4501283038,0.1903858568\C,2.9377908912,-2.7074128559,-0.900481  
989\H,2.6972459955,-1.6459722124,-1.0000128904\C,3.7567551279,-3.33402  
94842,-1.8477330987\H,4.1395223319,-2.750946787,-2.6901749544\C,4.0914  
738949,-4.6901438637,-1.7129582212\C,3.5939436791,-5.4272129948,-0.626  
6471256\H,3.8375079226,-6.4897244684,-0.522446668\C,2.7640254003,-4.81  
62741805,0.3228123352\H,2.3375418409,-5.405037052,1.1386603805\C,3.524  
9248341,1.2813911211,-0.6144614765\C,4.2150081387,0.7740302802,-1.7453  
85705\C,3.9069510665,0.8777945346,0.6980212535\C,5.288184949,-0.116880  
8264,-1.5406371522\C,4.9724082674,-0.0248735095,0.8456401422\C,5.67688  
00493,-0.5370651851,-0.2601974772\H,5.8263348668,-0.5133424202,-2.4097  
413636\H,5.2662290103,-0.3383861714,1.852091299\C,-3.9122876088,-0.484  
8607718,-0.8997811353\C,-4.1422557293,-1.6712047577,-0.1476948911\C,-4  
.2930009168,-0.4281162902,-2.2673338378\C,-4.7752817536,-2.7609208219,  
-0.7717323191\C,-4.9162482918,-1.5495379733,-2.8469599054\C,-5.1728011  
706,-2.7234219353,-2.1196465624\H,-4.9517045502,-3.6713847538,-0.18717  
10854\H,-5.2176598008,-1.5070345304,-3.9010470837\H,4.7341712934,-5.17  
34872098,-2.4562312839\C,-4.0752307311,0.8237163656,-3.1191591791\H,-3  
.5590093388,1.5725123378,-2.4950493936\C,-3.6906778838,-1.8074945712,1  
.307279758\C,-5.854111004,-3.9194632566,-2.778669592\H,-6.0416229779,-  
3.6440680072,-3.8336331076\C,-4.8864650674,-1.8231317768,2.2810876185\  
H,-4.5323379401,-1.8567960629,3.3279327002\H,-5.5171024446,-0.92437238  
08,2.1605674464\H,-5.5262084738,-2.7090489339,2.1107820318\C,-7.218083  
9387,-4.2273970965,-2.1266651884\H,-7.0972255582,-4.5259974681,-1.0688  
18447\H,-7.8839513281,-3.3463122975,-2.156058096\H,-7.7235045834,-5.05  
71255844,-2.6543975585\C,-4.9453009777,-5.1659783249,-2.7745215653\H,-  
5.4288227689,-6.002112218,-3.312476749\H,-3.9770859072,-4.9567316559,-  
3.263472411\H,-4.7382274978,-5.5054685212,-1.74277088\C,-3.1688152065,  
0.541977446,-4.3346553078\H,-3.6378498395,-0.1752544133,-5.0332479016\  
H,-2.9775151073,1.4766864092,-4.8936476001\H,-2.1978695274,0.131256181  
4,-4.0107509168\C,-5.4201949172,1.4462977929,-3.5478618618\H,-5.252135  
1758,2.381857653,-4.1125451986\H,-5.9951274955,0.7599359667,-4.1964138  
53\H,-6.0450219148,1.6846829133,-2.6681620941\C,6.8300474353,-1.519832  
3379,-0.073937461\H,7.0842010933,-1.9126282829,-1.0765633683\C,3.82254  
88975,1.1720040857,-3.1696120851\H,2.8363303474,1.6633551753,-3.111152  
1054\C,3.2095116017,1.4571002857,1.9321907687\H,2.1474666991,1.6067021  
032,1.6706717704\C,8.0814980616,-0.8068785258,0.4811570527\H,8.9272682  
737,-1.5132559298,0.5704746466\H,8.3943165477,0.0226182635,-0.17786139  
88\H,7.8821085744,-0.3865973184,1.4844599113\C,6.4391945275,-2.7190390  
518,0.8139547825\H,6.2284122409,-2.4009430772,1.8513569558\H,5.5418477  
177,-3.229935452,0.42395903\H,7.2632789146,-3.4545317484,0.8537860258\  
C,3.2460972107,0.5312495793,3.1603322784\H,2.912060697,-0.488709326,2.  
9083779725\H,4.2601706222,0.4617236186,3.5947006134\H,2.5770657934,0.9  
230262078,3.946821706\C,3.7973014853,2.8410165618,2.2871126834\H,3.722  
9372957,3.5412683882,1.4374014199\H,3.2574284829,3.2837635295,3.144362  
4176\H,4.8644525809,2.7496587347,2.5616213957\C,4.8272886413,2.1882027  
718,-3.7520644934\H,4.9102696838,3.0865042251,-3.1153499149\H,5.835626  
6676,1.741723922,-3.8385381682\H,4.5111352706,2.5117154592,-4.76089730  
6\C,3.65832993,-0.043000891,-4.1025987951\H,3.3178560773,0.2942334066,

-5.0991805826\H,4.6098213372,-0.5866486891,-4.2470617666\H,2.898597871  
8,-0.7321857478,-3.7000473868\C,-2.7861460037,-3.0386722579,1.51564223  
02\H,-3.3363832734,-3.983387816,1.3501035279\H,-1.9271407301,-3.003649  
7756,0.825064435\H,-2.4008047457,-3.0535897825,2.5514739278\H,-3.08154  
87386,-0.9215416484,1.5474189319\O,-2.5974130641,-0.2033015798,5.20029  
66588\C,-3.2452481673,0.9692651543,4.6762596694\H,-4.0337110588,1.2242  
252426,5.398838348\H,-2.5311382219,1.8068416896,4.5919079286\H,-3.6950  
491484,0.7590201393,3.691452959\\Version=ES64L-G09RevD.01\State=1-A\HF  
=-3291.2958062\RMSD=6.772e-09\RMSF=3.196e-06\Dipole=1.1966014,-1.58703  
3,4.8780484\Quadrupole=-1.9335835,12.4451812,-10.5115978,-21.1545531,-  
3.6423401,-10.1591042\PG=C01 [X(C65H72N1O5P1)]\@

E-2b/1c (Type I; conf1)

1\1\GINC-WORKER\FOpt\RTPSSSTPSS\def2SVP/W06\C65H72N1O5P1\JHIOE\05-Nov-2  
015\0\#p tpsstps/def2svp/w06 densityfit empiricaldispersion=gd3 opt  
scrf=(smd,solvent=ch2cl2,read)\title\0,1\p,-0.020402738,-0.599616110  
2,-1.2349604208\O,-1.3982593565,0.310874491,-1.5240273821\O,0.81918222  
38,0.4856569172,-0.2332956026\O,0.642657559,-0.7826960905,-2.568459984  
7\O,-0.3224371951,-1.7484352585,-0.2790169798\C,-1.3994787063,2.220950  
71,-0.0754211783\C,-2.0123128595,1.0514540091,-0.5384340847\C,-3.31456  
16039,0.6355482837,-0.1145964648\C,-3.987219238,1.4338906595,0.8016307  
24\H,-4.9997226003,1.1572103324,1.1142380704\C,-3.3868135559,2.5922050  
753,1.3715723179\C,-2.0563632247,2.972534973,0.9671260518\C,-1.4377984  
695,4.0706769613,1.6390603108\H,-0.4100272126,4.3426515113,1.383088879  
4\C,-2.1145664519,4.7873999433,2.615305492\H,-1.6146055737,5.621486726  
7,3.1198538023\C,-3.4482748898,4.4471650127,2.9684227012\H,-3.97618179  
68,5.0282353569,3.7322669465\C,-4.0658844826,3.3653993603,2.3616247999  
\H,-5.0827218795,3.0718903681,2.6460906665\C,-0.0950501715,2.662984442  
8,-0.6454435111\C,0.9970913622,1.7891138032,-0.6492200863\C,2.32430932  
18,2.204738069,-0.9815386562\C,2.5086272366,3.5126927746,-1.4087049227  
\H,3.5174969172,3.8633988114,-1.6498495229\C,1.4142057514,4.4114490914  
, -1.5650262954\C,0.0881967454,3.9870668219,-1.1890588818\C,-0.99580437  
23,4.8912617653,-1.4047091542\H,-2.0134976438,4.5703960344,-1.16386825  
88\C,-0.7789779513,6.1563185314,-1.9308685085\H,-1.6284406428,6.828268  
6356,-2.0960880013\C,0.5334756885,6.5856781774,-2.2649131381\H,0.69187  
45895,7.5898859673,-2.6730824393\C,1.6057764383,5.7256657246,-2.088789  
7413\H,2.621004442,6.0366282996,-2.3605292187\C,-1.3991371634,-0.49145  
78114,4.6540841871\C,-0.7798096396,-1.6091590835,5.2652431166\H,-1.117  
6313977,-1.9172763125,6.2591568872\C,0.2296140322,-2.2986509633,4.6049  
292995\H,0.6834060996,-3.1663980291,5.0929225154\C,0.628122871,-1.9228  
33998,3.2934768473\C,0.0210853589,-0.7842584158,2.70855659\H,0.3407587  
172,-0.4298297235,1.7262508084\C,-0.9668350697,-0.0646001365,3.3770739  
75\H,-1.3979606098,0.8174724676,2.8979855637\C,1.641822924,-2.70071765  
31,2.5813832571\C,2.7088594717,-3.420115823,3.3535609246\H,3.622242225  
9,-3.5402602316,2.7500322645\H,2.3611689189,-4.4275542794,3.6466918776  
\H,2.9456341627,-2.8629450658,4.2723314505\N,1.6084320854,-2.730355533  
4,1.262732083\H,0.8104301558,-2.2341630587,0.7384519679\C,2.474223883,  
-3.4268391507,0.3627836204\C,2.9172902842,-2.7341692399,-0.7799066097\  
H,2.666961793,-1.6792482258,-0.9189085389\C,3.7016317458,-3.4019260558  
, -1.7283068937\H,4.0487733015,-2.8574598809,-2.6110300531\C,4.04671136  
2,-4.7497162797,-1.544063935\C,3.5953239042,-5.4367397309,-0.406057047  
3\H,3.8473326816,-6.4926911546,-0.2625029985\C,2.8006536298,-4.7844437  
178,0.5462528632\H,2.4093206584,-5.3356720696,1.4049479072\C,3.4778607  
677,1.2623117006,-0.8100025188\C,4.1181479474,0.693172747,-1.940682084  
7\C,3.9382916287,0.9552889217,0.5030717664\C,5.2265935423,-0.153778446  
9,-1.7366009989\C,5.0380703937,0.0949384589,0.652005317\C,5.7002775358

-0.4700331016,-0.4546501894\H,5.7285051587,-0.5938753502,-2.606527173  
\H,5.3941369353,-0.140379291,1.6599610183\C,-3.935548184,-0.6128707608  
, -0.6628691561\C,-4.1264865974,-1.7395735521,0.1824917626\C,-4.3561054  
965,-0.6660729237,-2.0207353346\C,-4.7688692836,-2.8792506119,-0.33885  
46888\C,-4.9815706882,-1.8321692759,-2.4952119174\C,-5.2087664314,-2.9  
483379724,-1.6701967399\H,-4.9225531949,-3.7484022684,0.3126244337\H,-  
5.3064574395,-1.8662007122,-3.5418492279\H,4.6617789678,-5.2656159761,  
-2.2888294478\C,-4.1777133509,0.5162826837,-2.9752147813\H,-3.65172014  
36,1.3184781696,-2.4308359207\C,-3.6215345824,-1.763326768,1.626217013  
8\C,-5.889758698,-4.204997487,-2.2050300036\H,-5.986952315,-4.90586950  
35,-1.3545547694\C,-4.7782269335,-1.6994381994,2.6443362394\H,-4.38298  
78179,-1.66990859,3.676444009\H,-5.4020647099,-0.8011995388,2.49010369  
04\H,-5.4343697451,-2.5854422503,2.5574620946\C,-5.0274605804,-4.89524  
75865,-3.2821928791\H,-4.8994832287,-4.2450258468,-4.1673350919\H,-4.0  
228466205,-5.1378639234,-2.8922211825\H,-5.5017782416,-5.8353109587,-3  
.6197561725\C,-7.308844434,-3.9118278724,-2.7330170971\H,-7.8059726977  
, -4.8468720945,-3.0503368198\H,-7.9348222332,-3.4385198371,-1.95536046  
36\H,-7.2819056836,-3.2336474033,-3.6059148241\C,-3.3053847381,0.14242  
12982,-4.1911161517\H,-3.7855233262,-0.6387291753,-4.8092124779\H,-3.1  
463942951,1.0270733174,-4.8351170934\H,-2.3187151892,-0.2263683365,-3.  
8647686911\C,-5.5420532813,1.0889519988,-3.4122276701\H,-5.4016916652,  
1.9795681503,-4.0521310497\H,-6.1255503598,0.3480497218,-3.9893591948\  
H,-6.1460629793,1.387863825,-2.536498037\C,6.9001560236,-1.3949702483,  
-0.2667720544\H,7.1406440931,-1.8178829949,-1.2604846908\C,3.642723555  
2,0.987067988,-3.3647762024\H,2.6495603721,1.4612120747,-3.2862308686\  
C,3.2862847538,1.5949118314,1.7322953359\H,2.2127180541,1.7194774392,1  
.5081604721\C,8.135342459,-0.6075779299,0.2202365399\H,9.0149423095,-1  
.2718891228,0.3065054952\H,8.3900136955,0.2098472304,-0.4778654265\H,7  
.9506267682,-0.1595227301,1.2142792381\C,6.5862156902,-2.5720373533,0.  
6785241695\H,6.3763030606,-2.2203936774,1.7052451977\H,5.7088373446,-3  
.1414093837,0.3265302043\H,7.4458606883,-3.2647444362,0.7330712563\C,3  
.3836349272,0.7358008763,3.005159046\H,3.0492875053,-0.2985070643,2.82  
02354187\H,4.4152750983,0.6962917196,3.3999973814\H,2.7437483978,1.162  
9501894,3.7975033149\C,3.8687060304,3.003256614,1.9845648499\H,3.74654  
81927,3.6531537711,1.1007349539\H,3.3599447334,3.4871019243,2.83866844  
13\H,4.9482291852,2.942234388,2.2160116639\C,4.5919111456,1.982942071,  
-4.0644992961\H,4.6806593509,2.9254008891,-3.4958390967\H,5.6064652053  
,1.5547033939,-4.1686163207\H,4.2214169462,2.2282563012,-5.0769848205\  
C,3.4607510268,-0.2915294135,-4.205181328\H,3.0634842956,-0.0307549073  
, -5.2035818816\H,4.4169686625,-0.8238799355,-4.3602925531\H,2.73874241  
5,-0.9674507605,-3.7193531732\C,-2.7091334941,-2.9764609311,1.89615886  
21\H,-3.2661262116,-3.9296297135,1.8360861326\H,-1.8817282343,-3.00260  
98169,1.1677401337\H,-2.2782681789,-2.905250179,2.9114002633\H,-3.0036  
13553,-0.8630073658,1.7728783108\O,-2.3816889701,0.1011535469,5.363086  
3515\C,-3.0542392003,1.2366139253,4.7904011895\H,-3.8185923749,1.53247  
18469,5.5231928582\H,-2.348604346,2.0702454409,4.6302345964\H,-3.53687  
31802,0.9642380985,3.8369092802\Version=ES64L-G09RevD.01\State=1-A\HF  
=-3291.2957223\RMSD=4.087e-09\RMSF=6.385e-06\Dipole=1.4101788,-1.24851  
29,4.8957201\Quadrupole=-2.4318813,10.7156669,-8.2837856,-21.7004252,-  
2.4628559,-11.0789376\PG=C01 [X(C65H72N1O5P1)]\@

E-2b/1c (Type I; conf2)

1\1\GINC-WORKER\FOpt\RTSPSS\def2SVP\W06\C65H72N1O5P1\JHIOE\05-Nov-2  
015\0\#p tpsstps/def2svp/w06 densityfit empiricdispersion=gd3 opt  
scr=(smd,solvent=ch2cl2,read)\title\0,1\P,0.0436680223,-0.536904598  
3,-1.2840293285\O,-1.2482396005,0.460518299,-1.6690485377\O,0.84402045

99,0.4669988507,-0.1694371999\O,0.8210424605,-0.7184373113,-2.55435263  
57\O,-0.414557915,-1.6910306799,-0.3990076175\C,-1.2826974779,2.315591  
4136,-0.1551191477\C,-1.9100214285,1.1960334535,-0.7104372663\C,-3.259  
9300444,0.8296701086,-0.4085246048\C,-3.9674087233,1.629110864,0.48032  
32662\H,-5.0137143903,1.3937318981,0.701067261\C,-3.362284446,2.737183  
5184,1.1391837403\C,-1.9870516532,3.0655450364,0.8565657067\C,-1.37449  
95282,4.1096038229,1.6145605461\H,-0.3174220421,4.3382970244,1.4511443  
483\C,-2.0950474393,4.8271863454,2.5583277198\H,-1.6002155029,5.619317  
1791,3.1309687385\C,-3.4674105401,4.5412112138,2.7913888702\H,-4.02834  
61516,5.1226463337,3.531032836\C,-4.0830675749,3.5111113665,2.09874828  
21\H,-5.132165259,3.2588550026,2.2905478942\C,0.0882534011,2.701922254  
3,-0.5942788592\C,1.1292990033,1.7697448868,-0.5222095956\C,2.50107689  
67,2.1216703191,-0.7136537675\C,2.7897589588,3.4243099126,-1.099342087  
5\H,3.8334619299,3.7254805995,-1.2375905092\C,1.7625094318,4.382299365  
1,-1.335489773\C,0.3879669392,4.024870296,-1.0842013909\C,-0.622910788  
3,4.9931994001,-1.3668649539\H,-1.6732264363,4.7260635682,-1.219276933  
4\C,-0.2938876523,6.2532588395,-1.8445718336\H,-1.088702843,6.97484362  
51,-2.0634733286\C,1.0634470843,6.6136825717,-2.0602776396\H,1.3103745  
477,7.61399097,-2.432381121\C,2.0686678061,5.6920147909,-1.814059655\H  
,3.1187923435,5.9503105888,-1.9926067068\C,-1.8323635591,-0.5204948653  
,4.5058755954\C,-1.3160885977,-1.6815916367,5.131377413\H,-1.737287638  
2,-1.9906589895,6.0926640099\C,-0.2999183662,-2.4100883746,4.525661748  
1\H,0.0727827846,-3.3099724234,5.0236259763\C,0.2090722809,-2.02989212  
14,3.2543311131\C,-0.2975589059,-0.8502376156,2.6554238728\H,0.1043877  
124,-0.4959573917,1.7038374445\C,-1.2914464797,-0.0931471922,3.2708597  
335\H,-1.6427108777,0.8183071151,2.7819414815\C,1.2248641599,-2.848545  
5165,2.5943165134\C,2.1787120992,-3.6675066786,3.4135725648\H,3.124880  
6963,-3.8276394996,2.8731103776\H,1.7432674354,-4.6586393821,3.6359918  
967\H,2.3823478703,-3.1639876387,4.3704121065\N,1.2971216173,-2.831974  
0882,1.2774746351\H,0.5795397907,-2.2692249485,0.7057093222\C,2.192280  
1542,-3.5519263031,0.4254598909\C,2.8064965129,-2.8399394409,-0.622362  
2856\H,2.6643826746,-1.759661023,-0.7122571631\C,3.6152289136,-3.52530  
97155,-1.5365208028\H,4.0955686968,-2.9688706631,-2.3461744165\C,3.815  
7428372,-4.9089023016,-1.4102543876\C,3.198318695,-5.6124538788,-0.364  
543647\H,3.3400700092,-6.6939974581,-0.2674954867\C,2.3776936447,-4.94  
14545797,0.5526424516\H,1.8592917602,-5.4968386199,1.3386225007\C,3.59  
45444669,1.1333056369,-0.4375785897\C,4.3674397679,0.5959745684,-1.500  
7196032\C,3.8961059029,0.7856855315,0.9103827557\C,5.4559073811,-0.245  
1907788,-1.1954084158\C,4.9927412525,-0.0576633121,1.1606378486\C,5.79  
93051309,-0.5682822027,0.1275884384\H,6.0546895048,-0.6512547272,-2.01  
89430144\H,5.2494942158,-0.3139963513,2.1944890585\C,-3.8857308218,-0.  
368562696,-1.0554334352\C,-4.1692975124,-1.5280105908,-0.2801017078\C,  
-4.210136372,-0.3437310049,-2.4378074444\C,-4.8029577907,-2.6209447668  
, -0.8973298815\C,-4.8377019808,-1.4669127259,-3.0096175428\C,-5.148817  
7767,-2.6131053361,-2.2603187916\H,-5.0221616699,-3.5102928798,-0.2953  
480571\H,-5.0969542228,-1.448248688,-4.0755121931\H,4.4507367795,-5.43  
8536529,-2.1281936887\C,-3.9241281417,0.875273743,-3.3165025538\H,-3.4  
085490507,1.6269725705,-2.6952932946\C,-3.7837921647,-1.623643828,1.19  
71614018\C,-5.8311634356,-3.8128553058,-2.9115784002\H,-5.9830511541,-  
3.5597729896,-3.9778358792\C,-5.0126972165,-1.4950425667,2.1205140945\  
H,-4.7017380906,-1.505064863,3.1815145341\H,-5.563476229,-0.5566954644  
,1.9332265203\H,-5.7148059683,-2.3352641835,1.9641407261\C,-7.21835209  
29,-4.0840653771,-2.2934658822\H,-7.1336365785,-4.3612734472,-1.226328  
4001\H,-7.8681836402,-3.1931889706,-2.3617463426\H,-7.7221485379,-4.91  
69697881,-2.817699085\C,-4.9427629055,-5.0724516284,-2.8519910793\H,-5  
.4254659587,-5.9152107716,-3.3802909524\H,-3.9596249616,-4.8901574075,

-3.3216337732\H,-4.7668044074,-5.3875398433,-1.8068405648\C,-2.9815064  
857,0.5295314245,-4.4873957357\H,-3.4463588981,-0.1931495873,-5.183142  
3893\H,-2.7380634031,1.440307931,-5.0651061914\H,-2.0375857092,0.09812  
45393,-4.1142263405\C,-5.2327875084,1.5228644704,-3.8150283225\H,-5.01  
61299749,2.435566378,-4.400276388\H,-5.8026785001,0.8335270173,-4.4649  
523762\H,-5.8836289477,1.8057042155,-2.9679537071\C,7.0016986462,-1.45  
1163752,0.4559921358\H,7.1423228228,-1.401619037,1.5523712098\C,4.0605  
697439,0.9239687616,-2.9635778662\H,3.0982896144,1.4629777972,-2.98635  
02377\C,3.0994799677,1.3786116877,2.0766359033\H,2.0556682634,1.494948  
1048,1.7381604707\C,6.7406653226,-2.9263984306,0.0895545865\H,7.598748  
5928,-3.5585874272,0.3842390064\H,5.8395412609,-3.3108736358,0.5983655  
127\H,6.5911171329,-3.0430450606,-0.9988254205\C,8.2965499567,-0.93671  
64728,-0.2028138655\H,8.2415290084,-0.9990816816,-1.3051651299\H,8.492  
7091974,0.1160794962,0.0687190274\H,9.1628188217,-1.5418470366,0.12164  
00677\C,3.0680959983,0.4810474632,3.3257880109\H,2.7745603701,-0.55181  
75542,3.0742804343\H,4.0492117846,0.4437526375,3.8331798615\H,2.336015  
2274,0.874138908,4.0532035868\C,3.6284648579,2.7846804896,2.4360531448  
\H,3.5976316404,3.4613280142,1.5647151953\H,3.0187664847,3.235062812,3  
.2409106933\H,4.6751502517,2.7281358116,2.7878084924\C,5.1389445228,1.  
8543417057,-3.5569927531\H,5.2383682895,2.784010044,-2.9690941603\H,6.  
1267854465,1.3572340004,-3.5715265645\H,4.8832828586,2.1315968076,-4.5  
96198401\C,3.8819572441,-0.342440579,-3.8238682725\H,3.6305234562,-0.0  
594851764,-4.8628884912\H,4.806082175,-0.9480449995,-3.8613460888\H,3.  
0562324389,-0.9580024306,-3.4319049133\C,-2.9906487097,-2.906903989,1.  
5133343204\H,-3.6114323492,-3.813773727,1.3918901942\H,-2.1105869019,-  
2.9884711925,0.8541792732\H,-2.6398132623,-2.8825430724,2.5611366538\H  
,-3.115907223,-0.7752138728,1.4162065296\O,-2.8271698646,0.113074549,5  
.159837462\C,-3.3921497196,1.2967564347,4.5687624084\H,-4.1815393201,1  
.6274517035,5.2589119428\H,-2.6290658985,2.0880806537,4.4685381705\H,-  
3.8295262125,1.0689849331,3.5823853409\\Version=ES64L-G09RevD.01\State  
=1-A\HF=-3291.2947169\RMSD=3.415e-09\RMSF=2.903e-06\Dipole=0.869008,-1  
.4693352,5.0014902\Quadrupole=-3.7568549,13.1384279,-9.381573,-19.0795  
614,-3.6164035,-11.9924298\PG=C01 [X(C65H72N1O5P1)]\@

E-2b/1c (Type II; conf0)

1\1\GINC-LOGIN\FOpt\RTPSSSTPSS\def2SVP/W06\C65H72N1O5P1\JHIOE\07-Nov-20  
15\0\#p tpsstps/def2svp/w06 densityfit empiricaldispersion=gd3 opt s  
crf=(smd,solvent=ch2cl2,read)\title\0,1\P,-0.2725648806,-0.530156263  
9,-0.9442431273\O,-1.6278327744,0.3784911006,-1.3251721945\O,0.5825833  
338,0.616948558,-0.0354446128\O,0.3815840123,-0.8688280234,-2.25073046  
53\O,-0.6181347576,-1.58348663,0.1085944398\C,-1.7326897078,2.21937317  
13,0.1945387106\C,-2.2917360056,1.046406756,-0.3175963424\C,-3.5591256  
995,0.5303686863,0.0990740374\C,-4.2406498761,1.2212325866,1.091831271  
1\H,-5.2252505302,0.868943301,1.4158060197\C,-3.6758998348,2.359463358  
6,1.7358724608\C,-2.3946013317,2.8620299788,1.3030233891\C,-1.81200390  
27,3.9428655305,2.0310974027\H,-0.8221285477,4.3077098429,1.7420180889  
\C,-2.4699351017,4.5163125037,3.109832224\H,-1.996283539,5.3359641988,  
3.6612845276\C,-3.7484719824,4.0439170975,3.5112625989\H,-4.2599004746  
,4.5082826519,4.3614215771\C,-4.3356613016,2.9853896451,2.8359569211\H  
,-5.3110693316,2.5965550451,3.1496924652\C,-0.4651486814,2.7475079222,  
-0.3881542484\C,0.6669387856,1.9269555225,-0.4576219924\C,1.9541873279  
,2.4142385218,-0.8495370869\C,2.0568891315,3.7378377972,-1.2532634329\  
H,3.0373839936,4.1446581325,-1.5222530038\C,0.9175778016,4.591240761,-  
1.3222924191\C,-0.3674508783,4.0941661744,-0.895273172\C,-1.4990029022  
,4.9566172498,-1.0189380583\H,-2.4874634056,4.5841284639,-0.7348676965  
\C,-1.3654884465,6.247957045,-1.5080301407\H,-2.2509124935,6.886374155

6,-1.6017517666\C,-0.0931034945,6.7460879663,-1.896819403\H,-0.0002872  
999,7.7692458851,-2.2771343756\C,1.0229314042,5.9290008775,-1.80941670  
98\H,2.0076279681,6.2946679043,-2.1223797808\C,4.2403161039,-3.9698223  
154,-0.8009716282\C,4.8085023141,-3.9280343702,0.4947917467\H,5.838874  
6707,-4.2689724041,0.6298367633\C,4.0780592103,-3.4266185859,1.5625137  
527\H,4.5593803612,-3.3892892137,2.5421680152\C,2.7434339723,-2.958575  
0179,1.3926995517\C,2.1719280052,-3.0742181731,0.0976252381\H,1.137650  
2453,-2.7683883923,-0.0833193988\C,2.8987308003,-3.560843944,-0.983996  
4189\H,2.4227291406,-3.6068525636,-1.9656752911\C,2.0167318812,-2.3773  
351981,2.5184353585\C,2.6774438205,-2.2794804591,3.8649038252\H,2.1678  
515615,-1.5543963039,4.5142866367\H,3.725653266,-1.9670916604,3.744135  
3147\H,2.6800979032,-3.262944525,4.3677975968\N,0.7935595261,-1.895024  
1569,2.3515922796\H,0.3517729992,-1.8185398086,1.3799224819\C,-0.07441  
37006,-1.3605729117,3.3531769888\C,-0.7154777457,-0.1370305839,3.08016  
21885\H,-0.5134629091,0.3793984253,2.1381204971\C,-1.6051120048,0.3981  
595707,4.0201672212\H,-2.0962574821,1.353226872,3.8104096745\C,-1.8708  
110802,-0.2868416736,5.2167810349\C,-1.2462260002,-1.5185847802,5.4711  
152977\H,-1.4645776296,-2.0682886255,6.392736507\C,-0.3498145571,-2.06  
29605131,4.5417067195\H,0.1119618263,-3.0378423149,4.7212201163\C,3.16  
25495488,1.5354583211,-0.7063655319\C,3.6574700081,0.7797278544,-1.804  
7434641\C,3.8093405022,1.4657859299,0.5529590575\C,4.799299581,-0.0153  
907023,-1.6131687253\C,4.9595038945,0.6621353799,0.6913676647\C,5.4759  
759892,-0.0835714815,-0.3790825571\H,5.1820597057,-0.6081050982,-2.451  
5949705\H,5.4532098233,0.6246941017,1.6677088487\C,-4.1218574768,-0.70  
3693811,-0.5367747755\C,-4.2827464341,-1.8933001319,0.2258936084\C,-4.  
5147829603,-0.6812690149,-1.9051137029\C,-4.8674050545,-3.0180664611,-  
0.3883439101\C,-5.0813862122,-1.8355787206,-2.4725476894\C,-5.27681115  
89,-3.0140214737,-1.7306830887\H,-5.0014995721,-3.9353271143,0.1976649  
394\H,-5.3880769972,-1.8095393808,-3.5249595444\H,-2.5718857645,0.1341  
712473,5.9451679434\C,-4.3738821275,0.5693580551,-2.7753260923\H,-3.89  
15439921,1.3548447091,-2.1704676452\C,-3.8224893756,-2.0012757884,1.68  
17666158\C,-5.907487009,-4.2527494055,-2.3613875528\H,-5.9614028809,-5  
.0255202461,-1.5714894925\C,-5.0196858749,-2.0184757579,2.6547684681\H  
,-4.6670907388,-2.0444149242,3.7023964528\H,-5.6559776743,-1.124746095  
6,2.5307020402\H,-5.6539319554,-2.9092760529,2.4884325364\C,-5.0396006  
16,-4.8141746221,-3.5064467333\H,-4.9577231973,-4.0893153351,-4.337355  
3137\H,-4.0178020123,-5.0461267144,-3.156648807\H,-5.4830096159,-5.742  
359168,-3.9116964074\C,-7.3464101673,-3.9744226488,-2.8424974784\H,-7.  
8102894493,-4.8958569703,-3.2399570562\H,-7.9786405937,-3.6007158271,-  
2.0171524526\H,-7.3593258726,-3.2177762611,-3.6487154553\C,-3.47075456  
4,0.3157842042,-3.9998817623\H,-3.9231471115,-0.4212597294,-4.68888615  
87\H,-3.3211956541,1.2542838157,-4.5649718697\H,-2.481747879,-0.057849  
5483,-3.6860188431\C,-5.7551165525,1.1114483236,-3.1993532296\H,-5.642  
1889005,2.0436807946,-3.7831009683\H,-6.2976403903,0.382662008,-3.8294  
344702\H,-6.3843824966,1.3324992837,-2.3183253915\C,6.7469325513,-0.92  
76725101,-0.2728171166\H,6.5232917862,-1.8942645538,-0.7649949213\C,2.  
9889313913,0.8630467645,-3.1781374473\H,1.9250410756,1.0989799631,-3.0  
026327669\C,3.2980198263,2.2475842167,1.7652560576\H,2.3875578957,2.78  
97392953,1.4581998486\C,7.8980065639,-0.2655511588,-1.0640544855\H,8.8  
054311332,-0.8966147482,-1.0370290327\H,7.6231050332,-0.108754429,-2.1  
219833142\H,8.152628792,0.7191764616,-0.6296738425\C,7.1896649641,-1.2  
237860654,1.1679834696\H,7.5300941166,-0.3069427078,1.683619477\H,6.37  
40279484,-1.6675676783,1.7643252072\H,8.0349487857,-1.9350040602,1.165  
6189903\C,2.8997098424,1.3072467594,2.9199414591\H,2.1518907781,0.5718  
501383,2.581842706\H,3.773155288,0.7562066298,3.3132512132\H,2.4592118  
141,1.881229658,3.7557118826\C,4.3227825776,3.3046282642,2.2247946982\



H,4.5710368009,4.0000368106,1.4027603729\H,3.9192245486,3.8991391417,3.0651601545\H,5.2628100886,2.8328409084,2.5660564965\C,3.6076119044,2.0020821086,-4.0179008261\H,3.5337314856,2.9751739642,-3.5032708433\H,4.6777010977,1.8039897649,-4.2164164207\H,3.0896817671,2.0919287467,-4.9908239253\C,3.0301697892,-0.4626747265,-3.9575448633\H,2.4169191248,-0.3790473323,-4.8729709761\H,4.0566726791,-0.7245017839,-4.2743294139\H,2.6169398197,-1.2819893345,-3.3492406138\C,-2.911595765,-3.2246495033,1.9101642887\H,-3.4530136525,-4.1759442004,1.754841352\H,-2.047486234,-3.1908002657,1.2268154493\H,-2.5339026637,-3.2257373887,2.9482975042\H,-3.2192936592,-1.1064928171,1.906583986\O,5.0488938728,-4.3996193287,-1.788464047\C,4.5522962302,-4.4325577701,-3.1395602446\H,5.3974562726,-4.7738912102,-3.7543709053\H,3.7130938543,-5.1448002194,-3.2328285064\H,4.233126678,-3.4275101935,-3.4664613099\Version=ES64L-G09RevD.01\State=1-A\HF=-3291.2952665\RMSD=3.456e-09\RMSF=4.703e-06\Dipole=2.6441552,-1.8534847,3.7477804\Quadrupole=-3.4350661,-0.5702263,4.0052924,-20.1377854,-2.3098769,-2.954649\PG=C01[X(C65H72N1O5P1)]\@

E-2b/1c (Type II; conf1)

1\1\GINC-WORKER\FOpt\RTPSS\def2SVP\W06\C65H72N1O5P1\JHIOE\06-Nov-2015\0\#p tpsstps/def2svp/w06 densityfit empiricdispersion=gd3 opt scrf=(smd,solvent=ch2cl2,read)\title\0,1\P,-0.3487747866,-0.604290662,-0.9532970928\O,-1.6856126471,0.3048307643,-1.4002725226\O,0.5528298678,0.5934430905,-0.1615040017\O,0.2816246146,-1.0741512497,-2.2301733877\O,-0.7091916973,-1.5480582628,0.193510312\C,-1.681237723,2.3015858957,-0.08857234\C,-2.2993039477,1.1053684853,-0.4599924767\C,-3.579020004,0.6972194089,0.0316641128\C,-4.2016330571,1.5141737136,0.9664589819\H,-5.192382256,1.2428044933,1.345193165\C,-3.5727104383,2.6875268448,1.4745645626\C,-2.2860338269,3.0859048473,0.9581323028\C,-1.6398400823,4.2139083581,1.5477386154\H,-0.6454994866,4.5034004206,1.1955578716\C,-2.2422421299,4.9289416603,2.5725401819\H,-1.7206491472,5.783436754,3.0175283262\C,-3.525926098,4.5573021783,3.0553115187\H,-3.9928541148,5.1333727567,3.8616475266\C,-4.1743339704,3.456928539,2.5161716892\H,-5.1547449436,3.1463005391,2.8951415939\C,-0.4080504047,2.7100160551,-0.7479938071\C,0.6896087466,1.8428144939,-0.7299373546\C,1.9912590571,2.2317305339,-1.1775617253\C,2.1372348962,3.490215881,-1.7434926132\H,3.1293843006,3.8256697223,-2.0632911306\C,1.0289839263,4.3708765901,-1.9105129032\C,-0.2664770812,3.9841263946,-1.4072598533\C,-1.3635513463,4.8755094418,-1.6107038798\H,-2.3597124737,4.5832948452,-1.2657100397\C,-1.1875368519,6.0924075752,-2.2530624467\H,-2.0468651096,6.7547870698,-2.4051804096\C,0.0949120061,6.4828186365,-2.7235880527\H,0.2212529014,7.448215874,-3.2256908104\C,1.1782284302,5.6342188843,-2.5574292261\H,2.1698540824,5.916560343,-2.9291688317\C,4.1719592817,-4.1328193645,-0.4120034732\C,4.6913149506,-4.0228233113,0.8979606654\H,5.6851974279,-4.4021961562,1.1453358522\C,3.9374138118,-3.3919658571,1.8859856255\H,4.3771723459,-3.3079621143,2.8823129163\C,2.6446388782,-2.8665521835,1.6239351743\C,2.1202418815,-3.0443254554,0.3110613628\H,1.1136520769,-2.6987426922,0.0609935743\C,2.8678399194,-3.6513435015,-0.6848166836\H,2.4663300416,-3.7627949619,-1.6957762171\C,1.9156883062,-2.1636297421,2.6766470184\C,2.5655460506,-1.9506120951,4.015935184\H,2.045030668,-1.1811858324,4.6021702305\H,3.6113875633,-1.6376461179,3.8752318808\H,2.5726210424,-2.8902089382,4.5964291855\N,0.7068018083,-1.6710997083,2.4506356745\H,0.264271809,-1.6867682102,1.4756206468\C,-0.1442954592,-1.0085695965,3.3906685813\C,-0.7067651145,0.2256054711,3.0140704\H,-0.4629945703,0.6577104456,2.039890788\C,-1.571638401,0.8846240332,3.8970382817\H,-1.9989288259,1.8497065177,3.6089619679\C,-1.8933768155,0.3110673473,5.137452781\C,-1.3487557358,-0.9329640676,5.4947846212\H,-

1.6104116133,-1.3956679335,6.4522501622\C,-0.4760274897,-1.5995596209,  
4.624249281\H,-0.0729706373,-2.5816783646,4.8869850339\C,3.1733733504,  
1.3460518241,-0.9129754219\C,3.6823561443,0.47618424,-1.9148159948\C,3  
.7930491429,1.4038072584,0.3610287694\C,4.8130355732,-0.3030186624,-1.  
6180010408\C,4.9317688523,0.6106815547,0.6067173644\C,5.4635700815,-0.  
2456073207,-0.3695710737\H,5.203128579,-0.9859043794,-2.3814566285\H,5  
.4067025075,0.6723296244,1.5910319649\C,-4.2163450439,-0.5570705636,-0  
.4847269373\C,-4.3879535454,-1.6835491447,0.3683423217\C,-4.6538935793  
,-0.6194792971,-1.8361187585\C,-5.024066573,-2.8302711247,-0.140576937  
6\C,-5.2715692049,-1.7964813981,-2.2990067117\C,-5.4719478378,-2.91205  
06213,-1.4707481613\H,-5.1590372562,-3.6939486476,0.520635807\H,-5.610  
3833607,-1.8461250674,-3.3412087149\H,-2.5756426874,0.8285766808,5.820  
0783687\C,-4.497857898,0.5576306555,-2.8012258734\H,-3.9794184426,1.37  
10883109,-2.2663189168\C,-3.8837929334,-1.6952810615,1.812948756\C,-6.  
1263866962,-4.1812784227,-2.0101901225\H,-6.407828948,-3.9790987334,-3  
.0608888166\C,-5.0476792771,-1.558649087,2.8166373669\H,-4.6647286861,  
-1.528839473,3.8534145048\H,-5.6298066234,-0.6368332987,2.6416243888\H  
,-5.7407842935,-2.4166120943,2.734036108\C,-7.4141049281,-4.540000437,  
-1.2410219467\H,-7.1975171025,-4.7660910405,-0.1806496223\H,-8.1424013  
859,-3.7098011333,-1.2699903466\H,-7.8949720471,-5.4320524575,-1.68284  
96971\C,-5.1347511651,-5.3633074108,-2.0128969872\H,-5.598010227,-6.26  
08498665,-2.4625898728\H,-4.2262360483,-5.1184683765,-2.5915520694\H,-  
4.8215428562,-5.6236617483,-0.9849969044\C,-3.6289329091,0.1849801812,  
-4.0198951916\H,-4.1161759659,-0.5878464475,-4.6428716144\H,-3.4623124  
688,1.0723912012,-4.6582878275\H,-2.6458680283,-0.1953871169,-3.695613  
2192\C,-5.8706585554,1.1119089313,-3.2361968604\H,-5.7414557826,1.9950  
256117,-3.8886460648\H,-6.4507181205,0.3581172117,-3.7999471045\H,-6.4  
716995002,1.41855093,-2.3612206587\C,6.7177159966,-1.0902765233,-0.142  
6965467\H,6.4885104763,-2.0990825298,-0.5374622042\C,3.0427837413,0.41  
97856301,-3.302837157\H,1.9929661994,0.7415180328,-3.1869798582\C,3.26  
47389375,2.3132316225,1.4722886789\H,2.3424479574,2.7933792337,1.10433  
05313\C,7.9005375334,-0.5345052,-0.9671917307\H,8.7908140852,-1.181683  
942,-0.8615648622\H,7.6503423434,-0.4720690617,-2.0409485383\H,8.17257  
45381,0.4806276117,-0.6231384139\C,7.1153448473,-1.2460327079,1.332925  
5751\H,7.4613023862,-0.2884865934,1.76404454\H,6.2736998636,-1.6115339  
897,1.9464134403\H,7.9446399083,-1.969823537,1.4284102568\C,2.88538722  
69,1.5114553172,2.7325431651\H,2.1816880431,0.7031941758,2.477669446\H  
,3.7727589139,1.0578851553,3.2103426844\H,2.3993033351,2.1663158065,3.  
4785813836\C,4.2640385369,3.4418746781,1.7977418168\H,4.4922210806,4.0  
422813754,0.8987109526\H,3.847556999,4.1189997366,2.5661604995\H,5.216  
7011977,3.0355112143,2.1849481652\C,3.7487194379,1.402600607,-4.262598  
9621\H,3.7310873938,2.4351210519,-3.8731862241\H,4.8070004088,1.114819  
6752,-4.4076830002\H,3.2555268243,1.4023179163,-5.2523216077\C,3.01173  
70808,-0.9966113976,-3.9032504436\H,2.445487701,-0.9872935396,-4.85235  
16117\H,4.0258316191,-1.3746957051,-4.1297195281\H,2.5089073011,-1.696  
5553506,-3.2177480985\C,-3.0401528801,-2.9481009378,2.1225243898\H,-3.  
6463606284,-3.8718854336,2.0847317538\H,-2.2085317851,-3.0376296505,1.  
404993252\H,-2.6151130899,-2.8734049479,3.1392120399\H,-3.2228064063,-  
0.8221654003,1.9394465219\O,4.8325318916,-4.6711688661,-1.4545514658\C  
,6.1557382607,-5.1985027327,-1.2574032481\H,6.4775352861,-5.5629194049  
,-2.2435724135\H,6.8477062147,-4.4113679071,-0.908429832\H,6.143063560  
5,-6.0367581715,-0.5377723397\Version=ES64L-G09RevD.01\State=1-A\HF=-  
3291.2940631\RMSD=2.925e-09\RMSF=2.380e-06\Dipole=3.8550814,-1.7947911  
,4.8844898\Quadrupole=11.0196438,-1.5175297,-9.5021141,-33.4440133,3.8  
595813,-10.6467691\PG=C01 [X(C65H72N1O5P1)]\@

E-2b/1c (Type II; conf2)

1\1\GINC-WORKER\FOpt\RTPSSTPSS\def2SVP\W06\C65H72N1O5P1\JHIOE\06-Nov-2  
015\0\#p tpsstps\def2svp/w06 densityfit empiricdispersion=gd3 opt  
scrfl=(smd,solvent=ch2cl2,read)\title\0,1\p,-0.2613275049,-0.66619779  
31,-0.8187986017\O,-1.5938139298,0.1933229382,-1.3646092333\O,0.602626  
9265,0.5969753675,-0.08987758\O,0.4112552648,-1.2186225023,-2.03988654  
82\O,-0.6533232922,-1.5283263904,0.3811746645\C,-1.6653550877,2.262616  
8063,-0.1726304171\C,-2.2491245034,1.0337296136,-0.4883305057\C,-3.531  
0162384,0.6248032256,-0.0025520532\C,-4.1963463256,1.4839171413,0.8618  
414567\H,-5.190784852,1.2136422437,1.2313128605\C,-3.6053559933,2.6981  
00954,1.3156727767\C,-2.3136374408,3.0943837972,0.8101906385\C,-1.7078  
116972,4.2691004482,1.3493857373\H,-0.7113971455,4.560892696,1.0050551  
753\C,-2.3522943232,5.0269756937,2.3166088197\H,-1.8613182863,5.917157  
8577,2.7250138431\C,-3.6396223982,4.6537413936,2.788380566\H,-4.139879  
2573,5.2629384851,3.549038019\C,-4.2502091966,3.5108417926,2.295946519  
6\H,-5.2335518961,3.2003558607,2.6670651146\C,-0.3830208342,2.65546171  
57,-0.825353523\C,0.7275259592,1.8094020833,-0.7359814147\C,2.02873450  
08,2.1854640651,-1.1970662021\C,2.1655959382,3.4087335232,-1.838221095  
6\H,3.1559534306,3.732687297,-2.1750134577\C,1.0490314234,4.2647161913  
, -2.0663644548\C,-0.2488778238,3.8879964246,-1.5614496996\C,-1.3563098  
113,4.7455090335,-1.8396658977\H,-2.353780028,4.4572980445,-1.49546657  
89\C,-1.1879603693,5.9248143718,-2.5506765581\H,-2.0552154932,6.561257  
7135,-2.7583482792\C,0.0968448551,6.3094292515,-3.0192590595\H,0.21742  
78583,7.2454216036,-3.5755654097\C,1.1900372551,5.4904929561,-2.784437  
1304\H,2.1838712861,5.7676458557,-3.1542576927\C,4.0688855695,-4.21991  
57151,-0.1007757539\C,4.6621479602,-3.9575737718,1.1577689908\H,5.6906  
386576,-4.2853495446,1.3340292747\C,3.9547394884,-3.2697776958,2.13385  
47016\H,4.4542583956,-3.0677692489,3.0841116188\C,2.6220085946,-2.8213  
14883,1.9048660096\C,2.0303857358,-3.1443643408,0.6548265055\H,0.99906  
26007,-2.8538102883,0.4354649104\C,2.7339115824,-3.8193180299,-0.33719  
23414\H,2.242148803,-4.0257723801,-1.29004916\C,1.9129214642,-2.051831  
0423,2.9246431321\C,2.5674354258,-1.7820720248,4.2501353801\H,2.067938  
4954,-0.968486628,4.7935236781\H,3.6211934406,-1.5040987166,4.09555172  
12\H,2.5524732929,-2.6898360343,4.8792645723\N,0.7113638942,-1.5539274  
927,2.6697825679\H,0.2848786729,-1.6066458487,1.6892410298\C,-0.143692  
1715,-0.8359858918,3.5614998542\C,-0.7284069945,0.3547458574,3.0886773  
478\H,-0.4931286639,0.7086671351,2.0813969043\C,-1.6033931652,1.067627  
3462,3.9178127573\H,-2.0509220363,1.996874362,3.5519722241\C,-1.909580  
6398,0.5913457289,5.2028573271\C,-1.3411929426,-0.6094446115,5.6582467  
897\H,-1.5919639885,-0.9968103734,6.6513482877\C,-0.460281105,-1.33050  
53484,4.840914069\H,-0.0418365185,-2.2828975053,5.1786878178\C,3.21590  
85195,1.3243272995,-0.8817240496\C,3.7976826178,0.4820715029,-1.861858  
523\C,3.7744014653,1.3874119506,0.4249343184\C,4.9507494669,-0.2579894  
029,-1.5276892835\C,4.9146695209,0.6201571121,0.7130501814\C,5.5327794  
575,-0.1991130874,-0.2514267198\H,5.4000546483,-0.8959303343,-2.294374  
498\H,5.3483731454,0.6713636955,1.7195087708\C,-4.1302702562,-0.675973  
0546,-0.4416827084\C,-4.3259286559,-1.7294345698,0.4932671933\C,-4.526  
8534317,-0.8498322683,-1.7980272391\C,-4.9475326848,-2.9158303458,0.05  
69720906\C,-5.1315072819,-2.0585793067,-2.1836172939\C,-5.3616815075,-  
3.1032225964,-1.270829585\H,-5.1083292621,-3.7282374748,0.7759708653\H  
, -5.4411513428,-2.1836337964,-3.2280353517\H,-2.5987545658,1.150370385  
8,5.8446233681\C,-4.3492020284,0.248726616,-2.8482238295\H,-3.84542341  
21,1.1034706425,-2.3675443445\C,-3.8662777799,-1.6260574881,1.94934499  
22\C,-6.0351263969,-4.4019928979,-1.7063016118\H,-6.1150675232,-5.0420  
752314,-0.8074832297\C,-5.0604340053,-1.4440927509,2.909197969\H,-4.70  
6315673,-1.322870772,3.9495692203\H,-5.6601120591,-0.5550098923,2.6470

865286\H,-5.7309175758,-2.3232797453,2.8793049535\C,-5.1877540834,-5.1  
618164644,-2.7476225703\H,-5.0810926453,-4.5758851379,-3.679160041\H,-  
4.1745028115,-5.372141886,-2.3612015448\H,-5.6631378101,-6.1254491345,  
-3.0080057287\C,-7.4638290972,-4.1513668447,-2.2311665951\H,-7.9587140  
157,-5.1058792854,-2.488344072\H,-8.0829664901,-3.6370414405,-1.474353  
1587\H,-7.4506561031,-3.5235893803,-3.1412950151\C,-3.4519189159,-0.21  
43582219,-4.0142368439\H,-3.922214349,-1.0382407796,-4.5824266171\H,-3  
.2780402155,0.6208298323,-4.7175810033\H,-2.4730236605,-0.5590490715,-  
3.641297649\C,-5.7135391097,0.7587829267,-3.3580055401\H,-5.5726749298  
,1.589453127,-4.0740211837\H,-6.2749749158,-0.0410000203,-3.8752538952  
\H,-6.3384351024,1.1270315193,-2.5243589907\C,6.8158776965,-0.94613831  
19,0.1172701411\H,6.6301786072,-1.426972119,1.0980941078\C,3.223866526  
7,0.3953252403,-3.2772111889\H,2.1915527882,0.7844469626,-3.2341649805  
\C,3.1947355204,2.3107184158,1.4993544962\H,2.2407053051,2.7126890455,  
1.1193423075\C,7.216851972,-2.0492876791,-0.8743436568\H,8.0955426489,  
-2.5985800184,-0.4912445277\H,6.4069267961,-2.7807134615,-1.0339296413  
\H,7.4959326586,-1.6273331417,-1.8575183031\C,7.9789871993,0.054540078  
1,0.3079002167\H,8.2052835286,0.5720270433,-0.642839081\H,7.732064296,  
0.8230314768,1.0614346266\H,8.894885454,-0.4676758453,0.6406349785\C,2  
.8777637774,1.5631726309,2.8069231142\H,2.2032006542,0.7157482144,2.61  
02579632\H,3.7917018482,1.1741588419,3.2909483346\H,2.3788948321,2.237  
0199417,3.526917646\C,4.1264010686,3.5150906646,1.7472178553\H,4.30817  
28111,4.0759448305,0.8128682534\H,3.6775124371,4.2091570441,2.48162241  
58\H,5.105708676,3.1871143193,2.1426465308\C,4.0330766144,1.2863474313  
, -4.2438646949\H,4.0518951913,2.3369653682,-3.9052384188\H,5.079826283  
1,0.9356652775,-4.3155656961\H,3.5953043994,1.2619890146,-5.2589502175  
\C,3.138508528,-1.0505526821,-3.8016547147\H,2.6365870924,-1.063743645  
4,-4.7865794336\H,4.1388163446,-1.50098062,-3.9365594321\H,2.546600666  
9,-1.672610012,-3.1118056032\C,-3.0040487247,-2.8331399348,2.370449005  
7\H,-3.584579799,-3.7740232351,2.3698372991\H,-2.1436251439,-2.9449995  
067,1.6909334869\H,-2.6198215513,-2.6832664988,3.3951773828\H,-3.22785  
36865,-0.7313472571,2.0317743649\O,4.8483707689,-4.8440867939,-1.00533  
68533\C,4.3387491386,-5.0760645293,-2.3319783052\H,5.164311571,-5.5468  
188718,-2.8847027786\H,3.4710464245,-5.7590278737,-2.30607131\H,4.0580  
63818,-4.124159505,-2.8159264401\\Version=ES64L-G09RevD.01\State=1-A\H  
F=-3291.2955281\RMSE=6.747e-09\RMSE=5.888e-06\Dipole=2.4818534,-1.3245  
887,4.0779925\Quadrupole=-5.4130815,-0.4429612,5.8560427,-19.331991,1.  
3721916,-3.2281526\PG=C01 [X(C65H72N1O5P1)]\@

E-2b/1c (Type II; conf3)

1\1\GINC-LOGIN\FOpt\RTPSSSTPSS\def2SVP/W06\C65H72N1O5P1\JHIOE\23-Nov-20  
15\0\#p tpsstps/def2svp/w06 densityfit empiricaldispersion=gd3 opt s  
crf=(smd,solvent=ch2cl2,read)\title\0,1\P,-0.1043398598,-0.423871343  
1,-0.8313599148\O,-1.5187772741,0.365706054,-1.2711081518\O,0.56576295  
54,0.7860524082,0.1450406977\O,0.6647237618,-0.6713105811,-2.093444344  
2\O,-0.4180432638,-1.5338857249,0.1707859677\C,-1.9379811804,2.0709638  
017,0.3582839575\C,-2.3150527446,0.878265296,-0.266860154\C,-3.5306848  
588,0.1858874387,0.0295875873\C,-4.3506247944,0.7130230753,1.017012754  
8\H,-5.3028095879,0.2240314112,1.2457491144\C,-3.9739387323,1.86306020  
29,1.7682377555\C,-2.7426915624,2.5467738095,1.4568566254\C,-2.3484078  
386,3.6376890414,2.2895910541\H,-1.3967687513,4.1406253974,2.094169618  
4\C,-3.1400474149,4.0511906377,3.3517235001\H,-2.8089680324,4.88245624  
44,3.9838719718\C,-4.3716962152,3.4003554697,3.6317441556\H,-4.9907201  
746,3.7396971234,4.4693889805\C,-4.7760421547,2.3269675584,2.853716627  
\H,-5.7119026672,1.8006162319,3.0727911342\C,-0.7244237304,2.793233642  
2,-0.1207257372\C,0.4949753425,2.1139294231,-0.2261638207\C,1.71053082

82.2.7545697049,-0.6284488671\C,1.6709565085,4.1119068029,-0.913020168  
6\H,2.5940638974,4.6336931401,-1.1864107063\C,0.4500936783,4.846264117  
,-0.8912653316\C,-0.7754873653,4.1768747601,-0.5285606028\C,-1.9949170  
687,4.9155144721,-0.6147351314\H,-2.9400988097,4.4127396944,-0.3923292  
277\C,-2.0001243735,6.2509613688,-0.9896306077\H,-2.9506252816,6.79207  
69825,-1.0538844832\C,-0.7858103466,6.9205006107,-1.2981368753\H,-0.80  
22754147,7.97768372,-1.5848110333\C,0.4125465128,6.2258107643,-1.25689  
16304\H,1.3544857442,6.7219593029,-1.5176878064\C,4.6352095926,-3.7555  
788701,-0.2880261164\C,5.0238518148,-3.8057238283,1.0704581226\H,6.013  
1804948,-4.1662780333,1.3605270633\C,4.1363477658,-3.3801826397,2.0571  
474504\H,4.4718845419,-3.425672798,3.0956500671\C,2.8370169995,-2.9040  
517292,1.7405756282\C,2.4584614679,-2.8937048826,0.3667779583\H,1.4624  
96046,-2.5577687262,0.0652400045\C,3.3372186543,-3.2977438683,-0.62503  
91394\H,3.0435198826,-3.2603768118,-1.6780498043\C,1.9519036692,-2.435  
7285898,2.8037322849\C,2.4341859197,-2.4212789162,4.2273575186\H,1.810  
5613396,-1.7721426975,4.8572028604\H,3.4721101915,-2.0577633831,4.2681  
29558\H,2.4197464198,-3.4409238775,4.6515831315\N,0.7432783233,-1.9749  
554666,2.5181282537\H,0.4162400954,-1.8408074331,1.5068829866\C,-0.244  
8277016,-1.5135195279,3.443129428\C,-0.841367814,-0.2624684734,3.19703  
70405\H,-0.5216609911,0.3292364484,2.3343129073\C,-1.8366523419,0.2045  
115776,4.0653229463\H,-2.2913891357,1.1825279394,3.8843589615\C,-2.252  
1294228,-0.5754433722,5.1560793459\C,-1.6697977692,-1.8333807756,5.379  
4443393\H,-2.0024473331,-2.4552263769,6.2172532329\C,-0.6669702458,-2.  
3095190397,4.5244341286\H,-0.2302475838,-3.3002740947,4.6779400822\C,2  
.9741987953,1.9533042574,-0.7206830245\C,3.4463436747,1.5100666744,-1.  
9834911452\C,3.683533759,1.6154363167,0.4626278827\C,4.6227930933,0.73  
6698427,-2.0351371984\C,4.8454522894,0.832122601,0.359738117\C,5.33745  
60571,0.3804314475,-0.8799165291\H,4.9790506354,0.3989119452,-3.012214  
5386\H,5.387597274,0.5628679325,1.2748944413\C,-3.9147672997,-1.040309  
5565,-0.7413409189\C,-3.9258616976,-2.314876979,-0.1118947343\C,-4.297  
4756065,-0.9202635005,-2.1067945939\C,-4.3593872603,-3.4315688904,-0.8  
531121685\C,-4.713342541,-2.0679382798,-2.8036590665\C,-4.7613906,-3.3  
341903234,-2.1947632333\H,-4.3760389528,-4.4169423994,-0.3721566579\H,  
-5.0128527719,-1.9668489651,-3.8535836135\H,-3.0363124525,-0.206335218  
9,5.8254698981\C,-4.2823498302,0.4209938968,-2.8438438319\H,-3.9198641  
738,1.1924924976,-2.1441091091\C,-3.4669491359,-2.5117582144,1.3347891  
358\C,-5.2261116481,-4.5666751645,-2.9656297353\H,-5.1697128131,-5.424  
8837922,-2.2696274864\C,-4.6659904148,-2.6784076276,2.2918777311\H,-4.  
3163815742,-2.7820183144,3.3356856568\H,-5.3491664419,-1.8124668799,2.  
2472372221\H,-5.2515613176,-3.581916586,2.0378362159\C,-4.3007521115,-  
4.872540136,-4.1613511572\H,-4.3274954783,-4.0562100523,-4.9065540646\  
H,-3.2533088932,-4.9975188299,-3.8335511039\H,-4.6161775787,-5.8024069  
865,-4.6693277886\C,-6.6934191492,-4.4288003276,-3.4218972213\H,-7.032  
585398,-5.3494444094,-3.9315328892\H,-7.363170906,-4.245673108,-2.5625  
354885\H,-6.813622561,-3.5882849778,-4.1300534184\C,-3.308252744,0.393  
4479035,-4.0398641073\H,-3.6470985632,-0.3143287068,-4.8190294617\H,-3  
.2385879535,1.3947676994,-4.5037024459\H,-2.2983706056,0.0943896929,-3  
.7126884299\C,-5.7006473189,0.8412420412,-3.2820172391\H,-5.6774430906  
,1.8341008418,-3.7678413002\H,-6.1295097098,0.1228536714,-4.0048133465  
\H,-6.384796564,0.9004072355,-2.4162965261\C,6.6239392366,-0.447058268  
,-0.9222463795\H,6.5150696237,-1.2333097441,-0.1488287483\C,2.73439099  
21,1.8900104302,-3.2837160416\H,1.7061026861,2.1915577571,-3.018142644  
\C,3.2248336957,2.1122522481,1.8345541248\H,2.2687680489,2.645848608,1  
.695318882\C,6.8765191925,-1.1475791862,-2.2664261063\H,7.778986878,-1  
.7804869521,-2.2000259048\H,6.0306662404,-1.793588261,-2.5564762416\H,  
7.0492035725,-0.4165742473,-3.077624796\C,7.8412288955,0.4192496897,-0

.5279102556\H,8.0019364628,1.2247664248,-1.2684157881\H,7.7006560445,0.8919389569,0.4602011168\H,8.7602128775,-0.1941189986,-0.4842146911\C,2.9593973588,0.9493454014,2.8078283027\H,2.2333811449,0.2480712915,2.3691957937\H,3.8854256809,0.3916810212,3.0374095591\H,2.545245412,1.3229696057,3.7621134981\C,4.2300217644,3.1255716391,2.4197009667\H,4.3764307084,3.9812345832,1.7361078598\H,3.8683958172,3.5185323183,3.387915722\H,5.2166393532,2.65688912,2.5919225143\C,3.4290210738,3.102807934,-3.9412619619\H,3.4763488816,3.9673365443,-3.2564719832\H,4.4653196138,2.8478310472,-4.2327012687\H,2.8860579266,3.4164723261,-4.8520790244\C,2.6194831,0.72134524,-4.2806874641\H,2.016436245,1.0325027641,-5.1537701887\H,3.6071861304,0.4041273148,-4.6633801413\H,2.1203421101,-0.1368858385,-3.8031802682\C,-2.4905431509,-3.6956639023,1.4799771583\H,-2.9788849645,-4.6636819453,1.2646522594\H,-1.6310665974,-3.570010788,0.802334106\H,-2.1104229986,-3.7427449562,2.5156550604\H,-2.9157179228,-1.6033345827,1.6301719879\O,5.4224235874,-4.1158351758,-1.3192679531\C,6.7607801359,-4.5727300255,-1.0608513538\H,7.2085624238,-4.7468449073,-2.0495304162\H,7.3442695982,-3.8089450454,-0.5178436768\H,6.7481070892,-5.5164101091,-0.4863324899\Version=ES64L-G09RevD.01\State=1-A\HF=-3291.2942653\RMSD=7.362e-09\RMSF=3.358e-06\Dipole=3.4342558,-2.4152497,5.021519\Quadrupole=14.0891295,-4.2111557,-9.8779737,-33.2547574,5.0672352,-14.5210911\PG=C01 [X(C65H72N1O5P1)]\@

### Z-configuration

#### Z-2b/1c (Type II; conf0)

1\1\GINC-LOGIN\FOpt\RTPSS\def2SVP\W06\C65H72N1O5P1\JHIOE\07-Nov-2015\0\#p scrf=(smd,solvent=ch2cl2,read) rtpsstpss/def2svp/w06 densityf it opt empiricaldispersion=gd3\title\0,1\P,-0.9261223555,0.19609813,-1.6125802177\O,-2.3486151123,0.8769930481,-1.0452644437\O,0.1829903869,0.8954650388,-0.5284543175\O,-0.7653669453,0.6780466194,-3.0228539686\O,-0.8744160605,-1.2814328668,-1.2278438927\C,-1.9259670485,1.7519226763,1.1311447573\C,-2.6030387551,0.8488946469,0.3106033542\C,-3.5900354827,-0.0670887021,0.7928195463\C,-3.8629787638,-0.0567367846,2.1543697071\H,-4.6338996915,-0.7223402896,2.5552293662\C,-3.1383708457,0.770267099,3.060510557\C,-2.1343079582,1.6744740677,2.5552972868\C,-1.3531791977,2.41242781,3.4952482646\H,-0.5573857993,3.0680936478,3.1297365993\C,-1.5719701685,2.2885406603,4.8598520223\H,-0.9506119658,2.8541618702,5.5628461377\C,-2.5895820522,1.428521594,5.3540157551\H,-2.7567151283,1.3449080159,6.4333957654\C,-3.3538649666,0.6840613844,4.4691685226\H,-4.1244755706,-0.0020483872,4.8384183796\C,-0.9662730377,2.7202403151,0.5270196876\C,0.1085455185,2.2422674708,-0.2317350954\C,1.2047599755,3.0790448504,-0.6167944359\C,1.1033192381,4.4420262947,-0.3719846296\H,1.938874455,5.0984020007,-0.6382654491\C,-0.0454127869,5.0110290066,0.2499528305\C,-1.0934322296,4.1415069577,0.7251620799\C,-2.2340535254,4.7339689436,1.3474854012\H,-3.0519127766,4.089884097,1.6843674292\C,-2.3261717202,6.1086155133,1.510078164\H,-3.2155512221,6.5412734991,1.9814376114\C,-1.2812460568,6.961322755,1.0627629279\H,-1.364375643,8.044870746,1.2011764599\C,-0.1660586156,6.4199306672,0.4428259317\H,0.6418414021,7.067846555,0.0839613441\C,6.1032641037,-3.5196720401,0.9656724935\C,5.2427770255,-2.654758599,1.6868543817\H,5.6149769046,-2.1876774628,2.6035236465\C,3.9631558032,-2.3922608278,1.220956852\H,3.3295711768,-1.7010325208,1.7798025981\C,3.4936647321,-2.9616905614,0.0061781941\C,4.3720966797,-3.8093376605,-0.7109206211\H,4.0493150988,-4.2642270617,-1.6513792607\C,5.6505571974,-4.1076521004,-0.2368578715\H,6.2912315321,-4.780223491,-0.8116740776\C,2.195070604,-2.5970948371,-0.564713255\C,2.0515316741,-2.5103710836,-2.0576717103\H,1.059831635,-2.

1268083211,-2.3376035312\H,2.1773855255,-3.5152015016,-2.5002878034\H,  
2.8413705242,-1.8632453714,-2.4753984498\N,1.1266883069,-2.2814182995,  
0.1405423932\H,0.3031032178,-1.8614201211,-0.4210636439\C,0.8469567988  
,-2.4220115038,1.5319806956\C,0.0590107103,-1.4232063722,2.1341552832\  
H,-0.2734508129,-0.5655200002,1.5425490321\C,-0.2917614781,-1.54205774  
11,3.4856027029\H,-0.8957225239,-0.7582816559,3.9533168443\C,0.1183275  
076,-2.6607501236,4.2262095196\C,0.8768687007,-3.6704691433,3.60756674  
11\H,1.1787138187,-4.5571509012,4.1750417651\C,1.2425796222,-3.5597853  
406,2.2611509512\H,1.8180070057,-4.3511813415,1.7732937067\C,2.4886405  
868,2.4613581614,-1.0902553738\C,2.7368796779,2.2167317545,-2.46402547  
45\C,3.466175668,2.1216335624,-0.1106544642\C,3.9560235266,1.614934476  
2,-2.8334480724\C,4.6573497388,1.5026781111,-0.5293759351\C,4.92249927  
68,1.2395480835,-1.8858354948\H,4.1631856474,1.4275360536,-3.893065288  
2\H,5.402368309,1.2208798669,0.2227663941\C,-4.2977429773,-0.988193788  
9,-0.1536744311\C,-4.0656088836,-2.3924641856,-0.0935806579\C,-5.20504  
90443,-0.461984224,-1.1121978099\C,-4.7766242186,-3.2358708723,-0.9651  
189906\C,-5.8806840479,-1.3495423445,-1.9713358676\C,-5.6899226158,-2.  
7389544841,-1.9119748483\H,-4.6001617718,-4.3161487846,-0.9116412692\H  
,-6.5856125933,-0.9452304874,-2.708009215\H,-0.1619019482,-2.753586445  
9,5.2807680585\C,-5.4993041527,1.0353299012,-1.2194016018\H,-4.8648069  
695,1.5603211026,-0.4858072328\C,-3.0517595352,-3.0072846965,0.8736518  
958\C,-6.4445555137,-3.6760338946,-2.8509707526\H,-7.0814015528,-3.043  
0965483,-3.4973296435\C,-3.7474834477,-3.6649348257,2.0838998032\H,-2.  
9972030944,-4.055441124,2.7961771618\H,-4.3901050794,-2.9488321476,2.6  
245205165\H,-4.3837571561,-4.5104567491,1.7614197207\C,-7.3717110377,-  
4.6321826245,-2.0725532449\H,-6.7906367705,-5.3062859734,-1.4162978168  
\H,-8.0819012331,-4.0712391267,-1.4387763678\H,-7.9562881909,-5.261978  
8895,-2.7682462908\C,-5.4813622111,-4.4591831035,-3.766059573\H,-6.046  
1251513,-5.0878765754,-4.4788773437\H,-4.8376655692,-3.7741746174,-4.3  
462555942\H,-4.8237303775,-5.1253446737,-3.1774718086\C,-5.1446999374,  
1.5936088872,-2.6129334021\H,-5.782890009,1.1517751333,-3.4005247241\H  
,-5.2960289734,2.6887969777,-2.6363106941\H,-4.0899847942,1.3871360079  
,-2.8604666281\C,-6.9650576734,1.3415906992,-0.8462194523\H,-7.1497199  
446,2.4315363901,-0.862210168\H,-7.6693709194,0.8699855503,-1.55617074  
53\H,-7.2032254627,0.968863114,0.1663926083\C,6.223094751,0.5678145102  
,-2.3199108838\H,6.2109093122,0.5219797408,-3.4253598593\C,1.728131029  
,-2.652651271,-3.5260369424\H,0.7298753134,2.6154763672,-3.0572075126\C  
,-3.2206001711,2.3935615186,1.3775685137\H,2.4850993342,3.2133028999,1.  
4420154317\C,7.4608444956,1.3857279519,-1.8994791331\H,8.3855568343,0.  
9168627927,-2.2831231044\H,7.4104785759,2.4169999473,-2.2927839183\H,7  
.5471320094,1.4451980272,-0.7988850317\C,6.3051834408,-0.878441046,-1.  
7911063434\H,6.3147223335,-0.8995750136,-0.6862411829\H,5.4403920932,-  
1.4742652099,-2.1304133074\H,7.2253785201,-1.3782844802,-2.1459045509\  
C,2.5887718251,1.1655211963,2.0647136833\H,1.7291953992,0.7869436664,1  
.4903398631\H,3.3278178321,0.3497333115,2.1491384514\H,2.2405203224,1.  
417052178,3.0830925789\C,4.4803009356,2.8557969517,2.1324112942\H,4.94  
93339995,3.7288172251,1.6437108758\H,4.2160410734,3.1434681413,3.16619  
67553\H,5.238619439,2.0544438841,2.2000621496\C,2.0008533769,4.1078842  
141,-3.9651809907\H,1.9677479038,4.8021639969,-3.1074137969\H,2.998404  
574,4.197563774,-4.4349660408\H,1.2448737701,4.4392604229,-4.701064657  
7\C,1.6783295522,1.7152684653,-4.744444104\H,0.8363133478,1.998535035,  
-5.4007669182\H,2.6017970402,1.7711688939,-5.3501345886\H,1.51878134,0  
.6705082614,-4.4309050429\C,-2.1114800459,-4.0140685067,0.1810085555\H  
,-2.6495230959,-4.9238245025,-0.1432089348\H,-1.6309857188,-3.55524359  
02,-0.6979491127\H,-1.3200411308,-4.3326807442,0.8830714431\H,-2.42064  
01765,-2.1859727624,1.2508216994\O,7.3291251588,-3.7061297111,1.495058

578\C,8.2835693708,-4.5131593489,0.7855126139\H,9.2000667355,-4.491505  
2341,1.3928025718\H,7.9280714575,-5.5548618293,0.6880402015\H,8.490551  
3426,-4.0903868887,-0.2144332003\\Version=ES64L-G09RevD.01\State=1-A\H  
F=-3291.2881317\RMSE=3.289e-09\RMSE=1.793e-06\Dipole=5.3425793,-4.0661  
421,2.9504211\Quadrupole=20.2183261,5.4752406,-25.6935668,-35.6788849,  
-10.4022803,7.8042676\PG=C01 [X(C65H72N1O5P1)]\@

Z-2b/1c (Type II; conf1)

1\1\GINC-LOGIN\FOpt\RTPSSSTPSS\def2SVP/W06\C65H72N1O5P1\JHIOE\11-Nov-20  
15\0\#p scrf=(smd,solvent=ch2cl2,read) rtpsstpss/def2svp/w06 densityf  
it opt empiricaldispersion=gd3\title\0,1P,-0.9271628176,0.149049036  
1,-1.6171742066\O,-2.3448528319,0.8038624058,-1.0060483287\O,0.2023742  
776,0.8463235748,-0.5518749056\O,-0.808834494,0.6505260656,-3.02445203  
05\O,-0.8478336237,-1.3322406899,-1.2529894316\C,-1.8698582546,1.68572  
19063,1.1573512892\C,-2.5572782567,0.7273778459,0.3569636109\C,-3.5200  
955928,-0.1524260621,0.8687623355\C,-3.75426233,-0.1455426129,2.237252  
666\H,-4.5106442797,-0.8152552924,2.6585962174\C,-3.0159463187,0.69239  
75484,3.1217125786\C,-2.039804961,1.6101512317,2.5868268331\C,-1.24608  
97186,2.3639235352,3.5035047256\H,-0.4709267073,3.0305561445,3.1146616  
826\C,-1.4273900188,2.2423547077,4.8737683645\H,-0.7969622322,2.820554  
0909,5.5581969119\C,-2.4183866428,1.3688777817,5.3975410884\H,-2.55597  
66887,1.2873020695,6.4812525711\C,-3.1936671537,0.6090355678,4.5356935  
446\H,-3.9440758381,-0.086992993,4.9273405348\C,-0.9352688279,2.662712  
1479,0.5284282789\C,0.128971611,2.1918887593,-0.2494244974\C,1.2162786  
321,3.0342817659,-0.6477249086\C,1.1076047561,4.3972342248,-0.40473352  
31\H,1.9342710198,5.0594690794,-0.6841058905\C,-0.0361127103,4.9592835  
263,0.2327417565\C,-1.0688896412,4.0828803567,0.7283115389\C,-2.201512  
4,4.6672554468,1.3722826562\H,-3.0068238841,4.0166845406,1.7267492332\  
C,-2.3010979047,6.0414348063,1.5343582307\H,-3.1842005323,6.4682486077  
,2.0225214365\C,-1.2718868698,6.9013839084,1.0648062253\H,-1.360938143  
5,7.9845098623,1.2028142193\C,-0.1644261667,6.3675911393,0.4247169836\  
H,0.6316368415,7.0210757631,0.0499747088\C,6.1497051338,-3.4711263567,  
0.931040562\C,5.2871393158,-2.5868420812,1.6256018549\H,5.6603100091,-  
2.0853064572,2.5234950384\C,4.0040797007,-2.3490877983,1.1560969741\H,  
3.3673288724,-1.6418754613,1.6910045923\C,3.5337996466,-2.9642028334,-  
0.0355640198\C,4.4144787898,-3.8282015779,-0.7289833154\H,4.089700029,  
-4.3164055962,-1.6520710714\C,5.6971438271,-4.1012317503,-0.2500769431  
\H,6.3410501305,-4.7878648781,-0.8043357089\C,2.2261591296,-2.62963268  
87,-0.6044526159\C,2.0683458651,-2.574149876,-2.0968272371\H,1.0693487  
354,-2.2087727427,-2.3755854295\H,2.2056171035,-3.5861384304,-2.519492  
1779\H,2.8463664661,-1.9253467428,-2.5337891308\N,1.1623577572,-2.3176  
552888,0.1084889402\H,0.3270148408,-1.9106568484,-0.4463542846\C,0.917  
4193931,-2.4386260739,1.5090574309\C,0.1687228824,-1.4198777762,2.1262  
451628\H,-0.1659111627,-0.5619971753,1.5363785118\C,-0.1348326646,-1.5  
176392689,3.4908776807\H,-0.705617296,-0.7173739726,3.9718175886\C,0.2  
811097963,-2.6358436277,4.2290104906\C,0.9965199334,-3.6671142279,3.59  
49862277\H,1.3016305784,-4.5535151406,4.1611502364\C,1.3165322149,-3.5  
768250916,2.2353443267\H,1.8612618298,-4.382411899,1.7356119456\C,2.50  
15832373,2.4253658662,-1.1300663784\C,2.7318231665,2.1570372839,-2.502  
6017431\C,3.5022591116,2.123011176,-0.1605315696\C,3.9531960723,1.5653  
727383,-2.8804795811\C,4.6952350462,1.5130134739,-0.5874623384\C,4.941  
1942388,1.2243305753,-1.9424217724\H,4.1454108487,1.3600972059,-3.9395  
801389\H,5.4576371401,1.258937195,0.1568754202\C,-4.272785673,-1.06257  
39228,-0.0543999184\C,-4.0048953431,-2.4587388735,-0.0663222542\C,-5.2  
787290707,-0.5249008908,-0.9036908643\C,-4.7772815977,-3.2879374167,-0  
.9023688287\C,-6.0192770587,-1.3958075759,-1.7221084278\C,-5.790676155



2,-2.782979061,-1.7332268767\H,-4.5801735003,-4.3665387665,-0.91324101  
56\H,-6.7997009399,-0.9765881059,-2.3680066573\H,0.037242746,-2.711617  
9521,5.293900802\C,-5.5887624498,0.9727244119,-0.9451241217\H,-4.90802  
14132,1.4797232884,-0.2406958774\C,-2.9001830901,-3.0775184436,0.79328  
16153\C,-6.6163463106,-3.7155221564,-2.6152833814\H,-6.2038413133,-4.7  
334774224,-2.4831398564\C,-3.4742225461,-3.7474008067,2.0592884447\H,-  
2.6589535927,-4.1592774024,2.68230867\H,-4.0464283266,-3.033783661,2.6  
765239283\H,-4.1518986708,-4.5795405544,1.7909588525\C,-6.4948437048,-  
3.3519568162,-4.1090701265\H,-6.9165105026,-2.3508897935,-4.3150297735  
\H,-5.4387647409,-3.3479600909,-4.4328521701\H,-7.0431264912,-4.081409  
1337,-4.7330976659\C,-8.0926360722,-3.7474264754,-2.1677808018\H,-8.67  
1735106,-4.4643171882,-2.7786337548\H,-8.1813323297,-4.0492884405,-1.1  
08681379\H,-8.5634435648,-2.7527666679,-2.278018465\C,-5.3218795057,1.  
5656521506,-2.3440566917\H,-6.0061956695,1.1391935078,-3.1008903064\H,  
-5.4744010932,2.6608586831,-2.3333336668\H,-4.2840718598,1.3656219593,  
-2.6599054678\C,-7.0270172701,1.2669289295,-0.470946522\H,-7.214817898  
1,2.3563445934,-0.4570759409\H,-7.7761203346,0.8054159495,-1.140465045  
1\H,-7.1979672216,0.8779018357,0.5491114623\C,6.2414620843,0.557543302  
1,-2.3850681197\H,6.2191292739,0.5066245587,-3.4901125684\C,1.70289397  
33,2.5622590716,-3.557152213\H,0.7110683344,2.5172403457,-3.0761977349  
\C,3.282152534,2.42902108,1.3254920997\H,2.5657800031,3.2662770337,1.3  
819999934\C,7.4808557893,1.3803148988,-1.9796117095\H,8.4027012486,0.9  
123106611,-2.3711015947\H,7.424503354,2.4102067181,-2.37566829\H,7.578  
8892882,1.4434271434,-0.8802225434\C,6.3330516322,-0.8860563667,-1.850  
4180819\H,6.3541211007,-0.9004068227,-0.7457031661\H,5.4663680527,-1.4  
862688533,-2.1773137773\H,7.2511271217,-1.3848991742,-2.2121154729\C,2  
.6336594151,1.2303545387,2.0481501655\H,1.7492109858,0.8659805909,1.50  
31348599\H,3.3514920967,0.3952872119,2.1280780467\H,2.3191018472,1.508  
0092625,3.0705938502\C,4.5608548696,2.8784659428,2.0556796508\H,5.0478  
226226,3.725279572,1.539298415\H,4.3136455262,3.2004628183,3.083451276  
2\H,5.2985538354,2.059464265,2.1385863265\C,1.9483787009,4.0152876098,  
-4.0194813322\H,1.9112044252,4.7207666828,-3.170978945\H,2.9400558091,  
4.1146746651,-4.4996447958\H,1.1804608706,4.3241182852,-4.7528025953\C  
,1.651292118,1.6072452713,-4.7616828437\H,0.7947874383,1.8664263855,-5  
.4088649271\H,2.564864922,1.6702766385,-5.3815899114\H,1.5153598693,0.  
5638498832,-4.4323066\C,-2.0281642703,-4.0757948384,0.0064473223\H,-2.  
5855117781,-4.9945017509,-0.2534466006\H,-1.6513139165,-3.6149532266,-  
0.9203592881\H,-1.1608876492,-4.3808657456,0.619319895\H,-2.2407531396  
,-2.2538529695,1.1140513458\O,7.3784156257,-3.6327199418,1.4625051097\  
C,8.3343425186,-4.4602226994,0.7793347088\H,9.2521821273,-4.4133402905  
,1.38318441\H,7.9830720409,-5.5062181209,0.7193474467\H,8.5372659539,-  
4.0721219763,-0.235384756\\Version=ES64L-G09RevD.01\State=1-A\HF=-3291  
.2880073\RMSD=3.413e-09\RMSF=3.667e-06\Dipole=5.3948157,-3.9796762,2.9  
356407\Quadrupole=20.9109014,5.5462067,-26.4571081,-36.0685686,-10.332  
1824,8.2564397\PG=C01 [X(C65H72N1O5P1)]\@

Z-2b/1c (Type II; conf2)

1\1\GINC-LOGIN\FOpt\RTPSSTPSS\def2SVP/W06\C65H72N1O5P1\JHIOE\07-Nov-20  
15\0\#p scrf=(smd,solvent=ch2cl2,read) rtpsstps/def2svp/w06 densityf  
it opt empiricaldispersion=gd3\title\0,1\P,-0.9068333922,0.328706629  
2,-1.6157600517\O,-2.2228542178,1.1030714651,-0.9238440245\O,0.2902051  
515,0.7437223207,-0.4863020949\O,-0.7123231136,0.9632217039,-2.9595385  
842\O,-1.0126952254,-1.1832266103,-1.4169178221\C,-1.6718568059,1.6408  
131612,1.3367260437\C,-2.4661598658,0.9426767093,0.4241078553\C,-3.568  
2690727,0.1172018741,0.8104532155\C,-3.8417832267,0.0006210262,2.16652  
92609\H,-4.6986959326,-0.5963733976,2.4944762144\C,-3.0160684563,0.610

3985605,3.154408523\C,-1.8949070157,1.420727918,2.7456143698\C,-1.0257  
663666,1.927865024,3.758733813\H,-0.1451221977,2.5056669108,3.46522528  
79\C,-1.2715402502,1.6834700544,5.1021039719\H,-0.5833106598,2.0752501  
625,5.8590639321\C,-2.4029029711,0.9239484343,5.504073796\H,-2.5900645  
511,0.7443337526,6.5683437629\C,-3.2538985903,0.3960281286,4.545828900  
7\H,-4.1155398287,-0.2140434864,4.8396710574\C,-0.5857479661,2.5370031  
826,0.8474872542\C,0.401397454,2.0318434218,-0.0072092931\C,1.60770308  
17,2.7474281082,-0.2944061254\C,1.7334017387,4.0397178508,0.1944280132  
\H,2.6520705782,4.6023769153,-0.0001561224\C,0.6953640025,4.6642975358  
,0.9444410294\C,-0.4866849138,3.9095616573,1.277240762\C,-1.5252407864  
,4.5682615884,2.0032836612\H,-2.4433937395,4.0204836506,2.235248847\C,  
-1.3923839242,5.8904208145,2.4016086419\H,-2.2073297697,6.3767411581,2  
.9490708337\C,-0.2127571348,6.6221422309,2.0986828454\H,-0.1183981284,  
7.6641896448,2.4232567288\C,0.8071734998,6.0187286379,1.3800055145\H,1  
.7160399659,6.5758623156,1.1253896221\C,5.7764460326,-3.5334074782,1.2  
550902335\C,4.7902625011,-2.8137721058,1.9745691673\H,5.0108779128,-2.  
5015730279,2.999595248\C,3.5761462943,-2.5027499782,1.3800987176\H,2.8  
449044098,-1.9265410742,1.9500474314\C,3.3033487918,-2.8713932201,0.03  
3549377\C,4.3069316726,-3.5703167121,-0.677437485\H,4.1342183694,-3.87  
27511826,-1.713705116\C,5.5203455695,-3.9182230092,-0.079719275\H,6.26  
12446056,-4.474478163,-0.6585506674\C,2.0676567556,-2.4569883444,-0.64  
04049846\C,2.1083579443,-2.0580756359,-2.0863644964\H,1.0982813271,-1.  
8664184032,-2.4751298338\H,2.5922901578,-2.8435151524,-2.6903340728\H,  
2.7235530261,-1.1447207322,-2.1864199673\N,0.9090712144,-2.3272393299,  
-0.0289132705\H,0.1146076342,-1.8560556933,-0.5948616962\C,0.534359295  
7,-2.7163290392,1.2933828654\C,-0.1848430493,-1.7925387832,2.070823619  
7\H,-0.4093717074,-0.8033508368,1.6632641797\C,-0.5937030682,-2.153261  
8218,3.3623555669\H,-1.1432993814,-1.4297853555,3.972441583\C,-0.30565  
70872,-3.4320767777,3.863222441\C,0.38839651,-4.3586654922,3.065509842  
9\H,0.5976165591,-5.3644565759,3.4449583667\C,0.8099033006,-4.00804618  
82,1.7773544263\H,1.3411698733,-4.725789385,1.145797675\C,2.7303563877  
,2.0756076481,-1.0311332338\C,2.8034884491,2.1805859472,-2.4476668669\  
C,3.7260732085,1.3489522196,-0.3190097259\C,3.8672633074,1.5563489303,  
-3.125668187\C,4.7614038381,0.7332292842,-1.0518701163\C,4.8586496033,  
0.8267125623,-2.4503698306\H,3.9321084538,1.642802509,-4.2159230943\H,  
5.5186320701,0.1664022207,-0.4956181202\C,-4.3957033635,-0.5772271986,  
-0.2281208823\C,-4.345069042,-1.9948675414,-0.3531069266\C,-5.23956810  
6,0.1796675544,-1.0846717667\C,-5.1650402027,-2.6217611547,-1.30796835  
18\C,-6.0325294611,-0.4962826646,-2.0316632992\C,-6.0168348236,-1.8942  
384985,-2.1583847091\H,-5.1289770809,-3.7134795354,-1.3980982385\H,-6.  
6866080261,0.0858986285,-2.6929112043\H,-0.6298417271,-3.7119005636,4.  
8711091225\C,-5.3340491484,1.7039925057,-0.9953305013\H,-4.6301579588,  
2.0437826571,-0.2170445547\C,-3.4187591612,-2.8529701511,0.5113316069\  
C,-6.8902257978,-2.5978441391,-3.1937171262\H,-7.4372434168,-1.8097206  
69,-3.7450255608\C,-4.1978057636,-3.5699253033,1.6338288858\H,-3.50808  
61381,-4.1463137593,2.2777563822\H,-4.7431561686,-2.8541474158,2.27310  
79705\H,-4.938263179,-4.2748090704,1.2114649055\C,-7.9359189626,-3.513  
7784749,-2.5249001098\H,-7.4479492897,-4.3292488821,-1.9594847708\H,-8  
.572428711,-2.9475574317,-1.8214694864\H,-8.5924810603,-3.9765877987,-  
3.2847177322\C,-6.0411425793,-3.3807637842,-4.2161883767\H,-6.68408999  
85,-3.8229391185,-4.999247923\H,-5.3026557596,-2.7227620606,-4.7078621  
09\H,-5.4893522782,-4.2055834139,-3.7288709291\C,-4.9148285689,2.37899  
52614,-2.3173387817\H,-5.6090221156,2.123991375,-3.1392254005\H,-4.918  
3595269,3.4791176798,-2.2055445829\H,-3.8982800064,2.0662655526,-2.609  
5615598\C,-6.7430728776,2.1517938856,-0.5538100696\H,-6.7818249484,3.2  
5070709,-0.4389641142\H,-7.5100053938,1.862813721,-1.2958661563\H,-7.0

1956995,1.6970968788,0.4145892283\C,6.004370304,0.1696541463,-3.216061  
9733\H,5.8539779942,0.4071490508,-4.2860878416\C,1.7883787864,3.018902  
4226,-3.2271113085\H,0.846437684,3.0077378274,-2.6524675477\C,3.839075  
5032,1.2419916359,1.2105163618\H,4.5076228873,0.377431297,1.376587166\  
C,7.3722477227,0.7456042914,-2.7946853803\H,8.1836476106,0.3037450189,  
-3.401828673\H,7.4034176281,1.8420013599,-2.9257179288\H,7.58766985,0.  
523986204,-1.7330519688\C,5.9860183586,-1.3646698531,-3.0676094513\H,6  
.131121671,-1.6635750908,-2.0142714966\H,5.0269975379,-1.7891323598,-3  
.4117006601\H,6.7964625512,-1.8236725574,-3.6632094148\C,4.5679484407,  
2.4767883811,1.7867005483\H,5.537617739,2.6402892266,1.2835575907\H,3.  
959481795,3.3896124798,1.6607707847\H,4.7598177822,2.3419061541,2.8674  
233115\C,2.551258055,0.9504771604,2.0068507551\H,1.9160679894,0.205678  
6913,1.5019447175\H,2.8198603224,0.5520272099,3.0020844892\H,1.9465529  
266,1.856846576,2.1706644084\C,2.2732083155,4.4815896585,-3.3364552823  
\H,2.4534540609,4.9272987046,-2.3433639062\H,3.217976477,4.5371653131,  
-3.9091436338\H,1.5205052741,5.1023018864,-3.8568490178\C,1.4652743316  
,2.4554764883,-4.6221415564\H,0.6352324726,3.0299733389,-5.0714713053\  
H,2.3268230178,2.5305229214,-5.3113111527\H,1.1442021411,1.4039947616,  
-4.5548182661\C,-2.610484913,-3.8675488492,-0.3213679646\H,-3.25963682  
41,-4.6448308487,-0.7649134798\H,-2.0660900443,-3.355033713,-1.1308737  
803\H,-1.8744824705,-4.3816797033,0.3227281517\H,-2.6919363334,-2.1736  
150648,0.9858286017\O,6.9189364965,-3.7940118165,1.9223524902\C,7.9799  
795984,-4.4935036941,1.2514491841\H,8.7931078914,-4.5729804602,1.98744  
10344\H,7.6567068587,-5.5048739554,0.9448410811\H,8.3318289508,-3.9283  
402772,0.3692980947\Version=ES64L-G09RevD.01\State=1-A\HF=-3291.28735  
14\RMSD=7.497e-09\RMSF=2.153e-06\Dipole=5.3066485,-4.1268306,2.9537168  
\Quadrupole=20.9377523,2.9018675,-23.8396198,-31.1525148,-9.9958615,5.  
7506835\PG=C01 [X(C65H72N1O5P1)]\@

Z-2b/1c (Type II; conf3)

1\1\GINC-WORKER\FOpt\RTPSS\STPSS\def2SVP\W06\C65H72N1O5P1\JHIOE\23-Nov-2  
015\0\#p scrf=(smd,solvent=ch2cl2,read) rtpsstpss/def2svp/w06 density  
fit opt empiricaldispersion=gd3\title\0,1\P,-0.9735243887,-0.0259209  
401,-1.6075883514\O,-2.3724099377,0.7702871033,-1.1427461718\O,0.15174  
55092,0.7165261899,-0.5653472788\O,-0.7618811551,0.316180587,-3.051802  
8848\O,-1.0010678159,-1.4619065844,-1.0858959914\C,-1.9364659689,1.885  
0881936,0.915019077\C,-2.6429945923,0.9164897564,0.2018693313\C,-3.672  
6953489,0.1084697639,0.7770478528\C,-3.9539326497,0.2921482381,2.12459  
28892\H,-4.7523732189,-0.291804343,2.5932703665\C,-3.2051456964,1.1961  
330786,2.9328070222\C,-2.1649014445,1.9962487969,2.3334955687\C,-1.373  
5560363,2.8257879694,3.1843190272\H,-0.5562977451,3.4095209319,2.75116  
64755\C,-1.6123193494,2.883758559,4.5497790661\H,-0.9837789906,3.51866  
08723,5.1838258189\C,-2.6596743463,2.121539367,5.133468348\H,-2.841880  
1395,2.1803675294,6.2120757807\C,-3.4369234428,1.2938065045,4.33821913  
81\H,-4.234190922,0.6850593301,4.7797629117\C,-0.9161531007,2.71852132  
05,0.2170706713\C,0.1570190198,2.0902078968,-0.4250512973\C,1.32572102  
2,2.809616288,-0.8359751001\C,1.287852208,4.1969586492,-0.7830767633\H  
,2.1729144736,4.7699744804,-1.0803675254\C,0.1421207521,4.9017737581,-  
0.311861262\C,-0.9698101127,4.1571761817,0.2257044466\C,-2.0970977896,  
4.8816804219,0.7182417784\H,-2.9573693586,4.3279331743,1.1066808474\C,  
-2.1213983301,6.2684392438,0.6911469153\H,-3.0014564234,6.8035452273,1  
.0647198779\C,-1.0179774735,7.0008916791,0.1761924707\H,-1.0485706385,  
8.095911859,0.1639516396\C,0.0892755451,6.3277231463,-0.3164999355\H,0  
.9442002418,6.88100727,-0.7217328553\C,6.1256713482,-2.9739442369,1.12  
0504633\C,5.1910962066,-2.1485753984,1.7934559951\H,5.5356255175,-1.54  
2056191,2.6362931305\C,3.8756004981,-2.0852781383,1.3603542023\H,3.186

3840991,-1.4069871764,1.8660361647\C,3.4375623235,-2.8283451737,0.2305  
592216\C,4.3853722414,-3.6453659369,-0.4322648805\H,4.0872875562,-4.23  
02308731,-1.3069696258\C,5.7057759084,-3.7397485719,0.009624472\H,6.40  
39291811,-4.38757703,-0.5250133943\C,2.1034244101,-2.636388409,-0.3391  
366682\C,1.9252447221,-2.7422241305,-1.8274197091\H,0.8995706388,-2.47  
82046455,-2.1218812411\H,2.1330210704,-3.7789174012,-2.148785957\H,2.6  
487332306,-2.0860524255,-2.3402877295\N,1.0290507495,-2.3063384177,0.3  
506494882\H,0.1821841795,-1.980049229,-0.2363157716\C,0.7832713925,-2.  
2882058164,1.7550564716\C,-0.0289151939,-1.2531511043,2.2552818382\H,-  
0.3954955836,-0.4793715024,1.5755457591\C,-0.3516272068,-1.2255302836,  
3.6185809383\H,-0.9751327445,-0.412851899,4.0050911317\C,0.1153559629,  
-2.2343491546,4.4749788885\C,0.9043647731,-3.2791082245,3.9618683093\H  
,1.2539905188,-4.079402129,4.6226805572\C,1.2394087902,-3.3153830726,2  
.6033597344\H,1.8391190608,-4.1355371642,2.1989076718\C,2.6038733692,2  
.0683263995,-1.1062139582\C,2.9200763945,1.5654766428,-2.3930121697\C,  
3.5068406244,1.8763006222,-0.0195394963\C,4.1176916905,0.8452626866,-2  
.5684324615\C,4.6812235066,1.1362432217,-0.2440784331\C,5.0048157314,0  
.6047823545,-1.5054231402\H,4.3589296211,0.4611693213,-3.5638836792\H,  
5.3690594843,0.9593515782,0.5902851233\C,-4.4049682887,-0.8905243775,-  
0.0660064979\C,-4.2220727832,-2.2858438399,0.1547485081\C,-5.277884325  
2,-0.4447995079,-1.0946396487\C,-4.9388542268,-3.1984262356,-0.6394320  
108\H,-5.9664263211,-1.4004599899,-1.8658511567\C,-5.8156191882,-2.780  
3644463,-1.6565159778\H,-4.7963254199,-4.2713604724,-0.4672648707\H,-6  
.6440904422,-1.0579842861,-2.6578145528\H,-0.1420907729,-2.2141177012,  
5.539181815\C,-5.5146201995,1.0403204806,-1.3778222986\H,-4.8690107663  
,1.6237224368,-0.6998191624\C,-3.2589246292,-2.819171345,1.217337497\C  
, -6.555831211,-3.7898281299,-2.529234535\H,-7.2110540587,-3.2116764535  
, -3.2076596103\C,-4.0125685655,-3.3104442121,2.4711796794\H,-3.2967126  
844,-3.6304262094,3.2511235795\H,-4.6522546405,-2.5196529846,2.8999533  
588\H,-4.661176951,-4.173127736,2.2289558745\C,-7.4545485385,-4.727768  
2667,-1.6985121629\H,-6.8551703581,-5.3632778488,-1.0205912584\H,-8.17  
04178061,-4.1543823953,-1.0825073522\H,-8.03286874,-5.3976650753,-2.36  
10345527\C,-5.572477462,-4.594630478,-3.4043498264\H,-6.1194863143,-5.  
2794936283,-4.0783984253\H,-4.9517438687,-3.9237413512,-4.0246634156\H  
, -4.8932205995,-5.2048278865,-2.7806514266\C,-5.1216824327,1.417716501  
4,-2.8206540456\H,-5.767713885,0.9123057123,-3.5621255657\H,-5.2268267  
394,2.5077065878,-2.9736771158\H,-4.0735337245,1.141449806,-3.02394288  
32\C,-6.9719091114,1.4417372748,-1.0672930201\H,-7.1186528471,2.525159  
0121,-1.2317196255\H,-7.6857888974,0.9023882843,-1.7169567741\H,-7.232  
1251499,1.2165704502,-0.0171993635\C,6.310602092,-0.1675250141,-1.6856  
550706\H,6.5305484311,-0.6476454053,-0.7127926036\C,2.0077486987,1.861  
4148769,-3.58205409\H,0.9809728589,1.9536780337,-3.1892358194\C,3.2023  
556749,2.4343705541,1.3763484796\H,2.551458693,3.3141355355,1.23672699  
94\C,6.2284842681,-1.2789463409,-2.7458496483\H,7.1431535594,-1.898369  
1321,-2.7216831738\H,5.3636705031,-1.9408731591,-2.5672748197\H,6.1379  
27586,-0.8648262229,-3.7666899155\C,7.4750581941,0.8001637438,-1.99347  
61424\H,7.3055578175,1.3226134765,-2.9533968479\H,7.5783170437,1.56638  
79154,-1.2045096377\H,8.4322148522,0.2510664344,-2.0665316143\C,2.4080  
395542,1.4233564019,2.2297071934\H,1.5290706582,1.0436871382,1.6863205  
139\H,3.0392530582,0.5593173019,2.5022803159\H,2.0568802696,1.89178675  
11,3.166991269\C,4.4549584532,2.917466368,2.1300652281\H,5.0462399752,  
3.6268398967,1.5234197503\H,4.1568665062,3.4306194105,3.0622292422\H,5  
.1165016162,2.0793860997,2.4164758263\C,2.395605571,3.2087587121,-4.23  
04482805\H,2.3566162702,4.0332629232,-3.4970950991\H,3.4222072691,3.16  
83154137,-4.6407779286\H,1.7048282142,3.4553442922,-5.0579822493\C,1.9  
750770832,0.7381230053,-4.63161643\H,1.209906632,0.9627107272,-5.39541

05269\H,2.9426496146,0.6278956473,-5.1560602807\H,1.7089389969,-0.2267  
860546,-4.1691442401\C,-2.3351693687,-3.9272518649,0.6745076612\H,-2.8  
954956904,-4.8491491223,0.4330398235\H,-1.8132224605,-3.5836044353,-0.  
2327319232\H,-1.5785192857,-4.1907065809,1.4352796272\H,-2.6112955765,  
-1.9808206593,1.5215484543\O,7.3865692755,-2.9455913862,1.5970659412\C  
,8.4127997269,-3.6803620615,0.9094757362\H,9.3415324404,-3.4790165064,  
1.4627912475\H,8.2037302999,-4.7652913056,0.9220970529\H,8.5170061449,  
-3.3283866887,-0.1329635172\\Version=ES64L-G09RevD.01\State=1-A\HF=-32  
91.2887208\RMSD=3.879e-09\RMSF=3.995e-06\Dipole=5.4679044,-3.3926344,3  
.1739354\Quadrupole=23.1874151,2.8968696,-26.0842847,-32.9811064,-7.99  
49956,5.6227919\PG=C01 [X(C65H72N1O5P1)]\@

Z-2b/1c (Type II; conf4)

1\1\GINC-LOGIN\FOpt\RTPSSSTPSS\def2SVP/W06\C65H72N1O5P1\JHIOE\26-Jan-20  
16\0\#p scrf=(smd,solvent=ch2cl2,read) rtpsstpss/def2svp/w06 densityf  
it opt empiricaldispersion=gd3\title\0,1P,-0.9027796945,0.193423662  
8,-1.6252410398\O,-2.3356703908,0.8608054359,-1.0646908644\O,0.1933699  
987,0.8983140258,-0.5321126273\O,-0.7360856101,0.6802679119,-3.0329325  
202\O,-0.8433097106,-1.2843294011,-1.2429468248\C,-1.9252930339,1.7439  
791973,1.1112809857\C,-2.5919824866,0.8329970557,0.2908748481\C,-3.573  
311259,-0.0881870417,0.7739593779\C,-3.8464318839,-0.080238367,2.13548  
02545\H,-4.6148236778,-0.7495422249,2.5352865325\C,-3.1318751994,0.755  
7643535,3.0409912886\C,-2.1370575816,1.6695106329,2.5347355719\C,-1.36  
78830919,2.4213761107,3.4735245058\H,-0.5800350877,3.0860349173,3.1070  
589912\C,-1.5899258429,2.3017968081,4.8379328826\H,-0.978336092,2.8790  
495794,5.5400713639\C,-2.5987580486,1.4319967795,5.3330557567\H,-2.768  
7806801,1.3521318148,6.4122828405\C,-3.351187951,0.6742509316,4.449285  
0825\H,-4.1158318927,-0.018205436,4.8190620943\C,-0.9734410683,2.71929  
3182,0.5066819492\C,0.1078517035,2.2466622672,-0.245026285\C,1.1968972  
327,3.0904452218,-0.634388184\C,1.0810629882,4.4545472953,-0.402478897  
5\H,1.9101786579,5.1174613657,-0.6726308727\C,-0.0751744841,5.01664212  
68,0.2123798376\C,-1.1149090587,4.140463095,0.693905564\C,-2.262444113  
9,4.7255575384,1.3101377206\H,-3.0731622324,4.0749192862,1.6519302715\  
C,-2.3693421081,6.10046997,1.4610530131\H,-3.2636699597,6.5277428916,1  
.9279373933\C,-1.3329076895,6.9603221437,1.0075639211\H,-1.4275793574,  
8.0440130379,1.137062803\C,-0.211334117,6.4257395081,0.3930946161\H,0.  
5901926109,7.0791755354,0.030013878\C,6.0922975711,-3.5037957014,1.071  
4946747\C,5.2364599348,-2.6043376887,1.7502355915\H,5.5625480192,-2.08  
87707707,2.6566187597\C,3.9609296272,-2.355037339,1.2471826242\H,3.323  
9751097,-1.6408911784,1.7727888097\C,3.5029202658,-2.9614716766,0.0527  
147643\C,4.3847656425,-3.8434635341,-0.6270083796\H,4.0708593027,-4.32  
86531744,-1.555316307\C,5.6455021685,-4.128504081,-0.1171843073\H,6.31  
87113515,-4.8214439408,-0.6304413287\C,2.2119654738,-2.6008059216,-0.5  
395255187\C,2.0921379066,-2.5174452206,-2.0341190799\H,1.1031064462,-2  
.1403888068,-2.3319478153\H,2.2355528827,-3.5213267006,-2.4736053025\H  
,2.8854049042,-1.8652773624,-2.4377494851\N,1.1351980074,-2.2850092536  
,0.1517194988\H,0.3170594377,-1.8655297646,-0.4195490877\C,0.847162915  
5,-2.4195206072,1.5427058834\C,0.0634344855,-1.4141938587,2.1390634201  
\H,-0.2614634904,-0.5564262947,1.5434826248\C,-0.2914882815,-1.5262158  
717,3.4901539051\H,-0.8919234132,-0.737320342,3.9537095175\C,0.1098128  
089,-2.644861246,4.2355398219\C,0.863516702,-3.6614101586,3.6222560255  
\H,1.1581866682,-4.5480409674,4.1935660053\C,1.2345613395,-3.557038626  
,2.276795028\H,1.8084472774,-4.3523900379,1.7937299609\C,2.4859177008,  
2.4734535239,-1.0939268904\C,2.7458025573,2.2176173972,-2.4635975852\C  
,3.4522971378,2.1372612821,-0.1026488332\C,3.9645623395,1.6054755732,-  
2.8164479888\C,4.6443481692,1.5091997677,-0.5047621258\C,4.9200968913,

1.232531197,-1.8563716228\H,4.1813547603,1.4096936393,-3.8726061282\H,  
5.3806326565,1.2306503778,0.257198193\C,-4.2938250894,-1.0007161289,-0  
.171374923\C,-4.0572773027,-2.404548426,-0.1382019259\C,-5.2325161157,  
-0.4620612786,-1.0916371531\C,-4.7941586679,-3.2366940733,-0.999729002  
3\C,-5.933309806,-1.3381637728,-1.9424782637\C,-5.7378759725,-2.727801  
3527,-1.9094689636\H,-4.615795031,-4.3175111615,-0.9668285118\H,-6.660  
7548603,-0.9252526733,-2.6522728663\H,-0.1744165529,-2.7324979967,5.28  
9465287\C,-5.5269195352,1.0373260899,-1.1712204279\H,-4.8763736797,1.5  
499453356,-0.4429486438\C,-3.0125799002,-3.0298575921,0.7893395616\C,-  
6.5197913334,-3.6529286054,-2.8384234511\H,-7.1664310937,-3.0109805847  
, -3.4658836893\C,-3.6684651426,-3.7053675613,2.0117515302\H,-2.8963083  
452,-4.122845409,2.6840957113\H,-4.2778759262,-2.9933124097,2.59453049  
17\H,-4.3295058669,-4.5342222577,1.6958716753\C,-7.4359106836,-4.60845  
61576,-2.0460030744\H,-6.8456836388,-5.2751914871,-1.3904408794\H,-8.1  
435178042,-4.047453916,-1.40941413\H,-8.0233142407,-5.245665545,-2.732  
4744205\C,-5.5828049295,-4.4371179258,-3.7798505256\H,-6.1680619297,-5  
.0531367796,-4.4870504419\H,-4.9433300105,-3.7532506699,-4.3660510357\  
H,-4.9211537192,-5.1158701823,-3.2108809283\C,-5.1942073156,1.61083440  
62,-2.5639164028\H,-5.8478147235,1.1809776378,-3.3455499573\H,-5.33922  
42138,-2.7070835011,-2.5721521479\H,-4.144692208,1.4010220326,-2.830836  
7001\C,-6.9837820177,1.3444911953,-0.7661062993\H,-7.1669399597,2.4347  
423452,-0.7753425804\H,-7.7038301059,0.8765515446,-1.4624192754\H,-7.2  
017670587,0.9697132563,0.2502773279\C,6.224238307,0.5566490796,-2.2727  
77031\H,6.2141654476,0.4861236894,-3.3769270773\C,1.7536316935,2.66301  
5557,-3.5370885218\H,0.7501400583,2.6402606505,-3.078234885\C,3.194623  
4529,2.4239233753,1.3806037187\H,2.443973214,3.230564492,1.4304569965\  
C,7.4552394066,1.3932968902,-1.8695079026\H,8.3839621235,0.9240459053,  
-2.24289605\H,7.3962736876,2.4154512342,-2.2847682134\H,7.5405608259,1  
.4770436247,-0.7703149328\C,6.3164079899,-0.8769625381,-1.7125038396\H  
,6.3227869515,-0.8752638974,-0.6073873734\H,5.4582025,-1.4877498568,-2  
.0416473971\H,7.2419897622,-1.3759699518,-2.0536352165\C,2.5806036207,  
1.1948999746,2.0817963012\H,1.730734614,0.7946696758,1.507444924\H,3.3  
325349497,0.3927571406,2.1823238207\H,2.2218795253,1.4547971036,3.0944  
096617\C,4.4428357754,2.920440904,2.1329120025\H,4.8924176533,3.799334  
9227,1.6364570367\H,4.1709445206,3.2118765034,3.1637010095\H,5.2190896  
881,2.1370206793,2.2080440125\C,2.05352946,4.1143947178,-3.9718994423\  
H,2.0268978155,4.8075218156,-3.1130571903\H,3.0554977046,4.1872329905,  
-4.4351428523\H,1.3085949126,4.4602508915,-4.7123157094\C,1.7020401153  
,1.7283246139,-4.7573385342\H,0.877728081,2.0332792579,-5.4266106669\H  
,2.635644662,1.7626982568,-5.3490746183\H,1.5110619455,0.687483757,-4.  
4486362483\C,-2.0960065581,-4.0259317645,0.0510999352\H,-2.64061933,-4  
.9387554053,-0.2531329107\H,-1.6592288024,-3.5589210369,-0.8459816195\  
H,-1.2714263591,-4.3412117963,0.7153907884\H,-2.3713580056,-2.21183465  
72,1.157389924\O,7.3426473473,-3.8154561312,1.4688926624\C,7.880668611  
4,-3.1916416894,2.6460526499\H,8.9045863416,-3.5804533029,2.7455318408  
\H,7.9116610808,-2.0927791403,2.5333621188\H,7.2929576661,-3.461532127  
1,3.5420867746\\Version=ES64L-G09RevD.01\State=1-A\HF=-3291.2881877\RM  
SD=3.013e-09\RMSF=3.052e-06\Dipole=5.0208812,-3.156684,4.1280456\Quadr  
upole=17.1303287,-2.1750672,-14.9552615,-21.0241908,6.2991005,2.043267  
8\PG=C01 [X(C65H72N1O5P1)]\@

Z-2b/1c (Type II; conf5)

1\1\GINC-WORKER0\FOpt\RTSPSSTPSS\def2SVP\W06\C65H72N1O5P1\JHIOE\27-Jan-  
2016\0\#p scrf=(smd,solvent=ch2cl2,read) rtpsstpss/def2svp/w06 densit  
yfit opt empiricdispersion=gd3\\title\0,1P,-0.9277175602,0.1762338  
922,-1.5994791417\O,-2.3529745904,0.8126202166,-0.9854383891\O,0.18953

89266,0.8740966683,-0.5227783155\O,-0.8092258846,0.6924973929,-3.00155  
32234\O,-0.836372951,-1.3073544335,-1.2481015984\C,-1.891108086,1.6679  
098772,1.1917054616\C,-2.5682635087,0.7596952888,0.376435797\C,-3.5218  
68263,-0.1828656824,0.8732719041\C,-3.7565622666,-0.1993186078,2.24175  
82543\H,-4.5038379197,-0.885865826,2.6522421264\C,-3.0293913086,0.6342  
472436,3.1393347142\C,-2.062041455,1.569513579,2.6192628635\C,-1.27713  
85446,2.3180147505,3.5477465279\H,-0.5082738189,2.997990004,3.16956513  
03\C,-1.4603627862,2.1765213895,4.915796959\H,-0.8375265203,2.75216454  
29,5.6093210959\C,-2.4439016502,1.2864362891,5.4255162404\H,-2.5836944  
249,1.1895378444,6.5076806378\C,-3.2094036415,0.5304017264,4.551664604  
3\H,-3.9543347012,-0.1775680881,4.9320619164\C,-0.968172349,2.66446527  
99,0.5766655106\C,0.0980179911,2.2165338746,-0.210954724\C,1.168197656  
8,3.0782726964,-0.6136944341\C,1.0425579228,4.4372970444,-0.3576273861  
\H,1.8567067204,5.1143418483,-0.6380173218\C,-0.1028323427,4.976109159  
6,0.2970874456\C,-1.1192216125,4.0805797169,0.7926748189\C,-2.25360927  
28,4.6420744925,1.4534785137\H,-3.0461990241,3.9763838607,1.8085542403  
\C,-2.3695987822,6.0128188494,1.6328229834\H,-3.2532100529,6.422166519  
8,2.1348514352\C,-1.3560715463,6.8916309987,1.1641061685\H,-1.45773382  
27,7.9716979237,1.3165108695\C,-0.2481966499,6.3803685007,0.5065728187  
\H,0.5356367982,7.0487099148,0.1322864657\C,6.1623183395,-3.4712119868  
,0.9158402284\C,5.3115606625,-2.5809297915,1.6126849743\H,5.648478754,  
-2.0673465926,2.5161723865\C,4.0261889331,-2.3388968333,1.1317864922\H  
,3.3925275349,-1.6321040414,1.6710529091\C,3.5529655397,-2.9429930423,  
-0.05777226\C,4.4302249037,-3.8133451217,-0.7577286735\H,4.1044238828,  
-4.2961932107,-1.6832090301\C,5.7014323273,-4.0911893193,-0.2699889389  
\H,6.3713397918,-4.7763375242,-0.7978466592\C,2.246068278,-2.592657206  
9,-0.6208876064\C,2.0944822761,-2.4934707671,-2.114631744\H,1.0921222  
689,-2.1334667393,-2.3849888031\H,2.2510286347,-3.4882719643,-2.566714  
5391\H,2.8658061345,-1.8190629657,-2.5213364705\N,1.1813028449,-2.2986  
610796,0.0976615558\H,0.344752544,-1.8833916599,-0.4498272976\C,0.9331  
013758,-2.4495675953,1.495089644\C,0.1715584507,-1.4495902168,2.127309  
0813\H,-0.1673775388,-0.5841353468,1.5511968425\C,-0.1405242807,-1.576  
1744915,3.4877227421\H,-0.7232908035,-0.7912524661,3.979721074\C,0.281  
4278818,-2.7043974325,4.2069144263\C,1.0113091182,-3.7161067584,3.5580  
781653\H,1.3213060659,-4.6101877874,4.1092591218\C,1.3393094683,-3.597  
1695881,2.2026690924\H,1.8945212315,-4.3887803583,1.6925760513\C,2.454  
4679876,2.4842767991,-1.1110678503\C,2.6832199823,2.2411087415,-2.4888  
098034\C,3.4520396612,2.1575765893,-0.1476151486\C,3.901544509,1.65019  
37861,-2.8771796883\C,4.6424050831,1.5499233488,-0.5847773231\C,4.8874  
467318,1.2860323732,-1.944745227\H,4.0939956407,1.4648015707,-3.939863  
3035\H,5.4021292609,1.2779534257,0.1562527493\C,-4.2619811213,-1.09038  
85286,-0.0621282744\C,-3.9966735198,-2.4873151434,-0.0703576283\C,-5.2  
546247162,-0.5514027048,-0.9263832925\C,-4.7610909445,-3.3161201505,-0  
.914328625\C,-5.9849261172,-1.4218770366,-1.7544388079\C,-5.7616602611  
, -2.809930998,-1.7593231463\H,-4.5665129843,-4.3952468905,-0.920580030  
9\H,-6.7551864792,-1.0022404599,-2.4122099491\H,0.0308199084,-2.803414  
0916,5.2683270004\C,-5.5657432031,0.9459465196,-0.9731680446\H,-4.8893  
66543,1.4557823574,-0.2669603644\C,-2.8994060485,-3.1092209789,0.79633  
88806\C,-6.5775737519,-3.7410328496,-2.6516124253\H,-6.1814500422,-4.7  
626346057,-2.4995594608\C,-3.4854931772,-3.8081104093,2.0411216514\H,-  
2.6760946104,-4.2260323251,2.6678156221\H,-4.071702493,-3.1103756917,2  
.6636247135\H,-4.1530938214,-4.6398762916,1.7476574984\C,-6.4147747278  
, -3.3930657845,-4.1451246715\H,-6.8194455102,-2.3888542151,-4.36941710  
68\H,-5.3510661625,-3.4039598597,-4.4427180887\H,-6.9566854769,-4.1213  
951109,-4.7760307916\C,-8.0647596833,-3.7504012043,-2.2408298905\H,-8.  
6376805817,-4.4658638131,-2.8591636499\H,-8.1836280282,-4.040715686,-1

.1814646536\H,-8.5203994418,-2.7513672886,-2.3722052521\C,-5.293981176  
9,1.5356525675,-2.3723102647\H,-5.9768862941,1.1092795411,-3.130450314  
1\H,-5.4447146221,2.6310697129,-2.3638480084\H,-4.2553809561,1.3336669  
832,-2.6841023479\C,-7.0067105608,1.2374480248,-0.5054963366\H,-7.1995  
092224,2.3260668288,-0.4986753495\H,-7.7513288533,0.7683558692,-1.1747  
344422\H,-7.1795008968,0.8533760507,0.516151393\C,6.1893767233,0.63050  
38898,-2.3988933373\H,6.1579615149,0.5803302993,-3.5037106933\C,1.6570  
20709,2.6789846971,-3.5329595915\H,0.6648261671,2.6224596976,-3.053504  
576\C,3.2301949831,2.4325921435,1.3435970841\H,2.4768039827,3.23482899  
04,1.4177265477\C,7.4215684038,1.469511996,-2.0044788566\H,8.345918604  
1,1.0152746161,-2.4062142217\H,7.3462797675,2.4991008197,-2.3981233871  
\H,7.5295981229,1.5325172612,-0.9059215403\C,6.3049546153,-0.812473373  
5,-1.8675435574\H,6.3311658185,-0.8308743522,-0.7628371503\H,5.4468085  
867,-1.4255425321,-2.19267881\H,7.2291101148,-1.2955532585,-2.23462370  
95\C,2.6410710717,1.1947205555,2.0504307827\H,1.7772299542,0.795927063  
5,1.4963844547\H,3.3994140795,0.3954263095,2.1215033382\H,2.3098038137  
,1.44347223,3.0750981069\C,4.493634881,2.9308087248,2.0687599069\H,4.9  
271085299,3.8145712161,1.5666428053\H,4.244507018,3.2156184257,3.10711  
64867\H,5.2750771488,2.1507554251,2.1216556916\C,1.9093580473,4.144814  
1454,-3.9493795194\H,1.8844143574,4.822603677,-3.0783979298\H,2.898147  
1472,4.2516189597,-4.4338905966\H,1.1385847922,4.4832676114,-4.6664359  
579\C,1.601849057,1.7639888695,-4.7678597775\H,0.7535144381,2.05633938  
24,-5.4120842894\H,2.5198530609,1.8347241188,-5.3803280203\H,1.4484630  
657,0.7125637797,-4.4739666157\C,-2.006454247,-4.0836783842,0.00245629  
33\H,-2.5516502094,-5.002331016,-0.2824621782\H,-1.6226868873,-3.60122  
44157,-0.9104284074\H,-1.1442321143,-4.3915326722,0.6208612144\H,-2.25  
23604731,-2.2859465565,1.1422505927\O,7.4200650096,-3.7782708535,1.293  
2663442\C,7.9690763571,-3.1637477052,2.4702621252\H,8.9946115349,-3.55  
15703399,2.5558282245\H,7.9970277167,-2.0638560465,2.3669397425\H,7.39  
08921319,-3.4420483108,3.369929011\Version=ES64L-G09RevD.01\State=1-A  
\HF=-3291.2881191\RMSE=4.768e-09\RMSE=4.093e-06\Dipole=5.1407385,-3.12  
65767,3.9850297\Quadrupole=17.8829732,-2.5039966,-15.3789766,-21.13243  
59,5.4981991,2.7032137\PG=C01 [X(C65H72N1O5P1)]\@

Z-2b/1c (Type II; conf6)

1\1\GINC-LOGIN\FOpt\RTPSSTPSS\def2SVP/W06\C65H72N1O5P1\JHIOE\27-Jan-20  
16\0\#p scrf=(smd,solvent=ch2cl2,read) rtpsstps/def2svp/w06 densityf  
it opt empiricaldispersion=gd3\title\0,1\P,-0.8984572186,0.329415864  
9,-1.5726115685\O,-2.2374579507,1.0841843325,-0.9048140787\O,0.2711141  
111,0.7771222437,-0.4283272707\O,-0.6966408516,0.9558366787,-2.9189949  
126\O,-0.9762490822,-1.1827563641,-1.3630971425\C,-1.7350015878,1.6392  
098633,1.3636714806\C,-2.500673828,0.9235197139,0.4394091446\C,-3.5914  
627861,0.074951374,0.8080851553\C,-3.8885432058,-0.0404768404,2.159324  
8922\H,-4.7373056199,-0.6557334645,2.4744700459\C,-3.0931008481,0.5887  
280716,3.1594747723\C,-1.978975495,1.4179455244,2.7690281968\C,-1.1382  
213586,1.9423748269,3.7971307419\H,-0.2623097931,2.5348218142,3.519020  
5888\C,-1.4048466893,1.696900463,5.1363549516\H,-0.7379452576,2.102802  
6471,5.9048663315\C,-2.5301409701,0.9187609515,5.5194386119\H,-2.73423  
01773,0.7387192542,6.5805177293\C,-3.3533316363,0.373651857,4.54676401  
58\H,-4.2095537369,-0.2508146209,4.8259456066\C,-0.6586171308,2.555356  
9554,0.8890763982\C,0.3469282319,2.070083476,0.0442984617\C,1.53675409  
3,2.8131811795,-0.2425304622\C,1.6342576661,4.1061792825,0.2504305148\H,  
2.5409401802,4.6886732,0.0581259676\C,0.5804910013,4.7073092155,0.99  
77991099\C,-0.5902910124,3.9300805956,1.3188077596\C,-1.6479799821,4.5  
685327323,2.0351932518\H,-2.5586500707,4.0037834791,2.255503236\C,-1.5  
42993512,5.8917366713,2.4382019088\H,-2.3721103675,6.3619972489,2.9783



742541\C,-0.3736933348,6.6451118602,2.1490175383\H,-0.3012580359,7.687  
831295,2.4770380403\C,0.6633563724,6.0624902515,1.4377338764\H,1.56342  
18517,6.6376822759,1.1921516316\C,5.8348358995,-3.5324405844,1.2589441  
486\C,4.8741470537,-2.789209739,1.9849062942\H,5.0733757111,-2.4546986  
226,3.0055853992\C,3.6559530716,-2.4674920882,1.3890239073\H,2.9376037  
34,-1.8774524873,1.9614230824\C,3.3609906545,-2.8429776013,0.054926442  
4\C,4.3481935094,-3.5649714919,-0.6663592264\H,4.1583467892,-3.8762993  
904,-1.6970791811\C,5.553775278,-3.9199692246,-0.0725821005\H,6.305434  
0637,-4.4940969351,-0.6223084808\C,2.1179547528,-2.4231120941,-0.60237  
30866\C,2.1398495606,-2.0281650987,-2.0499518144\H,1.1249729284,-1.834  
8946794,-2.4249053434\H,2.6131652619,-2.8161131138,-2.6588047335\H,2.7  
552882025,-1.1164967714,-2.1626018179\N,0.9663470861,-2.2912065921,0.0  
217708263\H,0.1657396096,-1.8271898667,-0.541540401\C,0.5950900198,-2.  
67420852,1.3465679661\C,-0.1566727872,-1.7582257961,2.1026508965\H,-0.  
4017954808,-0.7814655272,1.6772719704\C,-0.5747669351,-2.1108105926,3.  
3934139503\H,-1.1508350829,-1.3926930883,3.9852891287\C,-0.263096482,-  
3.3754497928,3.9152363673\C,0.463968624,-4.2953432022,3.1390735526\H,0  
.690897823,-5.2910919277,3.534501204\C,0.8945161962,-3.9526206234,1.85  
18919706\H,1.4487469928,-4.667646306,1.2374084603\C,2.6653292911,2.171  
2278354,-0.996237015\C,2.7218068894,2.2993637308,-2.4117114927\C,3.676  
9239828,1.444572546,-0.3068857641\C,3.7812898432,1.6924210854,-3.11188  
11356\C,4.707270243,0.8472539295,-1.0610618719\C,4.784059764,0.9572650  
857,-2.459764749\H,3.8311885709,1.7936244674,-4.2016711176\H,5.4753784  
481,0.277536537,-0.5230133552\C,-4.3747119356,-0.6553441072,-0.2403500  
544\C,-4.2935824807,-2.0746281034,-0.3304866465\C,-5.204587734,0.06414  
87819,-1.1419347939\C,-5.0691719502,-2.7394810919,-1.2964488356\C,-5.9  
523380349,-0.6492957216,-2.0982080673\C,-5.9056968757,-2.0492092434,-2  
.1916273423\H,-5.0084181556,-3.8320543353,-1.3594739173\H,-6.595720478  
7,-0.0953821364,-2.7932312657\H,-0.594794413,-3.6501745012,4.922102228  
3\C,-5.3358681297,1.5874621207,-1.0902981102\H,-4.6622342046,1.9610316  
595,-0.3008324261\C,-3.3776326223,-2.8968224951,0.5788122135\C,-6.7295  
398523,-2.7940686519,-3.2387823433\H,-7.2744164672,-2.0301747055,-3.82  
51482733\C,-4.1784577169,-3.6277676967,1.6765552839\H,-3.4974406332,-4  
.1760032704,2.3535448551\H,-4.7717536512,-2.9239987618,2.2858890752\H,  
-4.8781484445,-4.35984538,1.2318301251\C,-7.7774226407,-3.7181275077,-  
2.5845399959\H,-7.2916497541,-4.5118942307,-1.9871630536\H,-8.44755400  
55,-3.1513341135,-1.9135715085\H,-8.3996751539,-4.20945156,-3.35523699  
04\C,-5.8308722054,-3.5806241087,-4.2151650428\H,-6.438637363,-4.05714  
06923,-5.0061587884\H,-5.0929869614,-2.9174415036,-4.7007154704\H,-5.2  
753560439,-4.3799065773,-3.6908881026\C,-4.896884464,2.2435864619,-2.4  
154783957\H,-5.5629939977,1.955100922,-3.2494343648\H,-4.9289900844,3.  
3454313,-2.3280176823\H,-3.8660693508,1.9491947431,-2.6744972225\C,-6.  
7670374209,2.0108546118,-0.698205835\H,-6.8341264159,3.1106252426,-0.6  
068529971\H,-7.5051108417,1.6892857839,-1.4559828564\H,-7.0612788174,1  
.5689028299,0.2708746329\C,5.9200304739,0.310567347,-3.2481146659\H,5.  
7484944831,0.549714881,-4.3145675625\C,1.6904954231,3.1405203522,-3.16  
70035871\H,0.7532496351,3.1034186028,-2.5858313181\C,3.8048194851,1.31  
72511414,1.2195742727\H,4.5052567751,0.4749062923,1.3684240878\C,7.290  
9170331,0.8959835347,-2.8505933678\H,8.0941786995,0.4641604651,-3.4756  
114551\H,7.3099327266,1.9932250214,-2.9771815712\H,7.5289902191,0.6720  
299097,-1.7942543589\C,5.9129371028,-1.2245311236,-3.1044902816\H,6.08  
07288821,-1.5274410297,-2.0554201362\H,4.9488992359,-1.6511069134,-3.4  
317795036\H,6.7134565439,-1.6773017083,-3.7179321916\C,4.4908579296,2.  
5656991222,1.8180839519\H,5.4504830705,2.7759046291,1.313047979\H,3.84  
93552207,3.4588093557,1.7173480541\H,4.6947058162,2.4136425091,2.89433  
09856\C,2.5296145919,0.9616133875,2.0099919061\H,1.9236850854,0.206273

0859,1.485545802\H,2.8115189685,0.5518791811,2.9968579432\H,1.89152859  
18,1.8409305184,2.1927811071\C,2.1545238436,4.6118569101,-3.2489998326  
\H,2.3278595686,5.0435870008,-2.2486722118\H,3.0989258305,4.6903852423  
, -3.8196768012\H,1.3936794773,5.2304734692,-3.7601060739\C,1.366302581  
9,2.6049026163,-4.5726514441\H,0.5156223814,3.1684289299,-4.9966005996  
\H,2.2173617059,2.723308256,-5.2685855852\H,1.0751472762,1.5437690125,  
-4.5297617156\C,-2.5081152428,-3.8939898815,-0.2124270168\H,-3.1163502  
616,-4.6961947977,-0.6694525022\H,-1.9521847771,-3.3731042304,-1.00856  
13625\H,-1.7796290307,-4.3767566348,0.4636237378\H,-2.6897276595,-2.19  
32096361,1.074819889\O,7.0352496199,-3.9089841627,1.7448082454\C,7.391  
1466747,-3.5498168181,3.0897692779\H,8.3930038646,-3.9724227544,3.2543  
462234\H,7.4280472367,-2.4518535016,3.210896135\H,6.6816954527,-3.9839  
307632,3.817330076\\Version=ES64L-G09RevD.01\State=1-A\HF=-3291.287353  
2\RMSD=8.114e-09\RMSF=3.600e-06\Dipole=4.886525,-3.46092,4.1146206\Qua  
drupole=13.200669,-2.8185636,-10.3821054,-19.448881,5.7237929,-0.88224  
17\PG=C01 [X(C65H72N1O5P1)]\@

Z-2b/1c (Type II; conf7)

11\GINC-LOGIN\FOpt\RTPSSSTPSS\def2SVP/W06\C65H72N1O5P1\JHIOE\26-Jan-20  
16\0\#p scrf=(smd,solvent=ch2cl2,read) rtpsstpss/def2svp/w06 densityf  
it opt empiricaldispersion=gd3\title\0,1P,-0.9553674136,0.025676235  
5,-1.6351475043\O,-2.3652821578,0.8001943695,-1.1645850734\O,0.1541844  
415,0.7664286457,-0.5779634688\O,-0.7447544319,0.3923245787,-3.0737253  
015\O,-0.9620640206,-1.4184092135,-1.1360768006\C,-1.9454870234,1.9298  
985633,0.8911734588\C,-2.6444189851,0.9557030278,0.1765756327\C,-3.680  
3946367,0.1525759057,0.7482326643\C,-3.9741530895,0.3446716109,2.09228  
14735\H,-4.7764740339,-0.2383330884,2.5560244039\C,-3.2305900469,1.250  
3028823,2.9028117758\C,-2.1841927783,2.0458099322,2.3080529136\C,-1.39  
58590318,2.8742547874,3.1630110973\H,-0.5726696234,3.4534204401,2.7351  
182313\C,-1.6433634862,2.9356527684,4.5267601265\H,-1.0161610051,3.569  
0763596,5.1636555075\C,-2.6972606486,2.1785192437,5.1053122779\H,-2.88  
61214159,2.2399759007,6.1826125839\C,-3.4717425475,1.3518124837,4.3064  
666051\H,-4.2734192282,0.7458378918,4.7438031387\C,-0.9203264077,2.764  
9755496,0.2022685249\C,0.1576862094,2.1392985293,-0.4330733986\C,1.333  
2268781,2.8564614093,-0.8278963852\C,1.3042779864,4.2429559378,-0.7591  
012634\H,2.1962005391,4.8137308477,-1.0395851966\C,0.1565206281,4.9481  
878791,-0.2922150897\C,-0.9669696298,4.2040928714,0.2223270961\C,-2.09  
59754184,4.9297034573,0.709150013\H,-2.9646298844,4.3767122591,1.07957  
58221\C,-2.1107799914,6.3167877112,0.7013321684\H,-2.9920351658,6.8525  
629009,1.0710791798\C,-0.9959517379,7.0484729096,0.210693799\H,-1.0188  
823201,8.1437430654,0.2131216699\C,0.1126546255,6.3744589285,-0.277834  
6638\H,0.9757570353,6.9277199458,-0.6653538508\C,6.1118896873,-3.01056  
53247,1.2364400095\C,5.1951323801,-2.1146055862,1.8347719517\H,5.49598  
87777,-1.4668977221,2.661277635\C,3.8940198864,-2.0327492536,1.3441280  
05\H,3.210006806,-1.3106507093,1.7939905816\C,3.4658402772,-2.81122420  
59,0.2422476412\C,4.4042979476,-3.6932562023,-0.35619944\H,4.112737577  
8,-4.3069271928,-1.2131664402\C,5.6955558581,-3.8093876281,0.144387066  
6\H,6.4161703726,-4.4968694811,-0.3080545102\C,2.1485175708,-2.5977562  
826,-0.3608220085\C,2.0044662386,-2.684575377,-1.8525999775\H,0.984879  
7764,-2.4200474674,-2.1678097557\H,2.226742266,-3.7146149725,-2.185119  
6746\H,2.7370188862,-2.0167609909,-2.3373443575\N,1.0648751786,-2.2651  
996835,0.3120444191\H,0.2285429679,-1.9319770722,-0.2848375276\C,0.794  
9772174,-2.2617565603,1.7125637796\C,-0.0501630765,-1.248482377,2.2018  
979575\H,-0.4239490747,-0.4814079664,1.5188206814\C,-0.4010800964,-1.2  
345190378,3.5584058327\H,-1.0536186703,-0.4398426089,3.9339847883\C,0.  
0717283413,-2.2357378655,4.4200797212\C,0.8938362804,-3.2600841317,3.9

173587541\H,1.247354044,-4.0564527164,4.5808763312\C,1.2563812793,-3.2  
825988908,2.5657900857\H,1.8790149283,-4.0898850396,2.1709329935\C,2.6  
000572331,2.0966315524,-1.098149988\C,2.9093493959,1.5943446363,-2.386  
9690579\C,3.4820633882,1.8586943376,-0.0038807196\C,4.0760893939,0.823  
8344108,-2.5561249807\C,4.6264071351,1.0714461298,-0.2230919735\C,4.93  
72021594,0.532279683,-1.4843504137\H,4.3119653433,0.4364696859,-3.5514  
918001\H,5.2980543333,0.8574997549,0.6156915623\C,-4.4036139005,-0.859  
6850903,-0.0862892689\C,-4.2492409713,-2.2497504769,0.1848170733\C,-5.  
2481760059,-0.4362271391,-1.1482713375\C,-4.963666182,-3.1777736946,-0  
.5935033821\C,-5.933772698,-1.4072136867,-1.9023550218\C,-5.8109446812  
, -2.7816338906,-1.643258987\H,-4.8426672036,-4.2461559943,-0.380701465  
6\H,-6.5895985378,-1.0811207092,-2.7190916777\H,-0.2075069508,-2.22690  
71749,5.4789169412\C,-5.465137811,1.0415899855,-1.4812688173\H,-4.8234  
172224,1.6402089428,-0.8131220361\C,-3.3119674408,-2.7681225991,1.2774  
172651\C,-6.5478483314,-3.8084628533,-2.4983425345\H,-7.1908797013,-3.  
2439926487,-3.1996073263\C,-4.0956658547,-3.295847394,2.497077604\H,-3  
.3993287707,-3.611562536,3.2961700326\H,-4.7666897193,-2.5246759721,2.  
914615868\H,-4.7162935578,-4.1692715859,2.222936033\C,-7.4629872298,-  
4.720002098,-1.6561719593\H,-6.8770898179,-5.3414005556,-0.9538500103  
\H,-8.1842346228,-4.1274170403,-1.0651573142\H,-8.0358962424,-5.403557  
8423,-2.3093079697\C,-5.5588225139,-4.6412228182,-3.3407335886\H,-6.10  
20657552,-5.3400660778,-4.0034169088\H,-4.9269143667,-3.990146454,-3.9  
707986241\H,-4.8904930463,-5.2388400281,-2.6933376481\C,-5.0489451052,  
1.3702290376,-2.9294586877\H,-5.6889605606,0.8475500535,-3.6641618603\  
H,-5.1426030954,2.455761101,-3.1175429245\H,-4.0002926957,1.0801611017  
, -3.109248938\C,-6.9230159943,1.4656628419,-1.2044705799\H,-7.05715016  
15,2.5447959401,-1.4041655422\H,-7.6324194557,0.9129638398,-1.84778434  
26\H,-7.2008086448,1.2752161202,-0.1520197614\C,6.2051131969,-0.303026  
6325,-1.6556725393\H,6.3808317907,-0.8099251976,-0.6873464337\C,2.0222  
064981,1.9406737629,-3.5813840293\H,0.9908441506,2.037430014,-3.201602  
5722\C,3.1845776442,2.419876938,1.392420139\H,2.5800748878,3.331697552  
4,1.2488900211\C,6.0851369285,-1.3921386335,-2.7351008896\H,6.96279607  
54,-2.0622924161,-2.7012057347\H,5.1817418684,-2.0081573171,-2.5848270  
275\H,6.0391152923,-0.9590972862,-3.7509683291\C,7.4212102589,0.609976  
7114,-1.9271329286\H,7.2917217436,1.157360933,-2.8793003913\H,7.549584  
8428,1.3557103099,-1.1222692125\H,8.3514318798,0.0161762581,-1.9965543  
911\C,2.3298061806,1.4437982106,2.2287450222\H,1.4528304103,1.09042045  
41,1.6656817758\H,2.9215688021,0.5591356978,2.5232880155\H,1.972233957  
8,1.9301364484,3.1541972107\C,4.4481421194,2.8332355487,2.1691787961\H  
,5.0866150631,3.5130577592,1.5770022011\H,4.1630322692,3.3565160223,3.  
0997851467\H,5.0583752529,1.9590197648,2.4611851662\C,2.4451599911,3.3  
001319514,-4.1808931589\H,2.4060536787,4.1030859494,-3.424175562\H,3.4  
78722291,3.252885981,-4.5724062453\H,1.7757084025,3.5837060454,-5.0141  
4459\C,1.9876787397,0.8523830023,-4.666854279\H,1.2306355776,1.1101913  
228,-5.4282196856\H,2.9580318187,0.7509570745,-5.1877427351\H,1.709904  
5502,-0.1252289577,-4.2391625622\C,-2.3361902988,-3.8386868256,0.74911  
60775\H,-2.8619445931,-4.765810527,0.4553656252\H,-1.7835916124,-3.455  
2512082,-0.1234877845\H,-1.6075451725,-4.1058194421,1.5355133584\H,-2.  
6999168985,-1.917257653,1.6174394526\O,7.3957378131,-3.1584131977,1.62  
18556602\C,7.9068768534,-2.344712801,2.690564082\H,8.9604440863,-2.637  
6597414,2.8061517773\H,7.8460094569,-1.2713550664,2.4336008986\H,7.363  
0160479,-2.5372810727,3.6330851835\Version=ES64L-G09RevD.01\State=1-A  
\HF=-3291.2887316\RMSE=3.785e-09\RMSE=3.897e-06\Dipole=5.1100957,-2.53  
55709,4.2554767\Quadrupole=17.8984845,-2.5599088,-15.3385756,-17.33395  
82,7.2806561,2.6963791\PG=C01 [X(C65H72N1O5P1)]\@

Z-2b/1c (Type I; conf0)

1\1\GINC-WORKER\FOpt\RTPSSSTPSS\def2SVP\W06\C65H72N1O5P1\JHIOE\22-Nov-2  
015\0\#p scrf=(smd,solvent=ch2cl2,read) rtpsstps/def2svp/w06 density  
fit opt empiricaldispersion=gd3\title\0,1P,-1.0989947322,0.06897357  
95,-1.4566957374\O,-2.4697724476,0.7573154192,-0.7813581282\O,0.102494  
4608,0.800592056,-0.5005139655\O,-1.0671082421,0.5202478672,-2.8862735  
872\O,-0.9862312422,-1.3958054932,-1.0373181975\C,-1.8498205169,1.7101  
524753,1.3140207848\C,-2.6039303247,0.7844788398,0.5913110906\C,-3.561  
654199,-0.0909208889,1.1932471593\C,-3.6949631111,-0.0436917461,2.5752  
07283\H,-4.432088091,-0.6869199989,3.0670630209\C,-2.8765519446,0.7993  
894604,3.3818980792\C,-1.9269208658,1.6852495718,2.7528918108\C,-1.075  
0199452,2.4691899878,3.5888425327\H,-0.3251843963,3.1183037555,3.12720  
04469\C,-1.1737173383,2.4038632956,4.9711864369\H,-0.5021997796,3.0069  
472184,5.5922650291\C,-2.1341055605,1.5579289615,5.5884168867\H,-2.206  
7900241,1.5216132784,6.6809043285\C,-2.9649919122,0.7707181668,4.80662  
68915\H,-3.6976781729,0.1009464733,5.2713927313\C,-0.9536988084,2.6573  
647591,0.5914121666\C,0.0515982317,2.1552706313,-0.2420500553\C,1.1100  
802242,2.977344861,-0.7448840149\C,1.0304297902,4.3473929947,-0.534409  
6106\H,1.8400251804,4.99352521,-0.8903862204\C,-0.0636856182,4.9372446  
116,0.1630419976\C,-1.0672626129,4.0843057635,0.7510265936\C,-2.154316  
1848,4.6965362961,1.4455492907\H,-2.9404377687,4.0634082086,1.86828561  
2\C,-2.2353072701,6.0756282281,1.5720500034\H,-3.0839967599,6.52360123  
,2.1006527098\C,-1.2319028216,6.9129329435,1.0142873349\H,-1.305216834  
9,8.0003359764,1.1252167524\C,-0.1707187288,6.351630601,0.3211436026\H  
,0.6035458513,6.9874262121,-0.1233738375\C,5.4519578001,-2.8757133725,  
2.9159730201\C,5.3680355258,-2.3216503764,1.6139655342\H,6.2919210563,  
-2.0285480169,1.1067167034\C,4.1344713667,-2.1444441128,1.0055564886\H  
,4.0980084069,-1.6839230158,0.0158255086\C,2.9306484863,-2.4923800905,  
1.6791895814\C,3.0293859457,-3.0091435495,2.993156591\H,2.1247209658,-  
3.2763505433,3.5469635329\C,4.2666374295,-3.220278967,3.6042698311\H,4  
.3027858261,-3.643417844,4.6106812801\C,1.6148180044,-2.2239429266,1.0  
992288661\C,0.454321549,-1.8846102012,1.9922532632\H,-0.3841885898,-1.  
4943633166,1.3976925925\H,0.7534103063,-1.1489864913,2.7551692462\H,0.  
1163579441,-2.7956832934,2.518937555\N,1.3622831435,-2.2168463474,-0.1  
924526988\H,0.3855327785,-1.8620165502,-0.4931372389\C,2.1606047148,-2  
.6331579166,-1.3014933751\C,2.1938114396,-1.7910302828,-2.4268181071\H  
,1.69142221,-0.8204694966,-2.3983350565\C,2.8974184579,-2.1951133383,-  
3.5690107672\H,2.9295091197,-1.5330709701,-4.4400937367\C,3.5612973667  
, -3.430948389,-3.5898659397\C,3.516058779,-4.2695016964,-2.4623339655\  
H,4.0233276075,-5.2399125188,-2.4779899705\C,2.8119525449,-3.880673753  
3,-1.3161572752\H,2.7576817737,-4.5369289131,-0.4428357572\C,2.3408641  
521,2.329648808,-1.3086694379\C,2.4695273621,2.0530092415,-2.693154203  
9\C,3.3855790502,1.9819719677,-0.4046049705\C,3.6329850561,1.401755367  
2,-3.145644206\C,4.5191672265,1.3162483181,-0.9050055326\C,4.659295794  
4,1.0079250357,-2.2705898969\H,3.7435828852,1.1833327592,-4.2135028178  
\H,5.3172385082,1.0350998432,-0.2097722376\C,-4.3931930495,-1.00057648  
45,0.3416804493\C,-4.237349901,-2.4132026123,0.4281691504\C,-5.3503927  
749,-0.4490718789,-0.5538838632\C,-5.0529452218,-3.2374398119,-0.36786  
49861\C,-6.1359073825,-1.3190839617,-1.3332606048\C,-6.0075438123,-2.7  
150165849,-1.257136776\H,-4.9293753116,-4.3242777901,-0.2973358963\H,-  
6.8771607949,-0.8953163821,-2.0218517174\H,4.1127215872,-3.7430973082,  
-4.4828942455\C,-5.5864428416,1.0584301084,-0.6725033733\H,-4.85706567  
78,1.5716537932,-0.0239061178\C,-3.2026368924,-3.0684594218,1.34564611  
21\C,-6.8687210355,-3.6317823309,-2.1219876811\H,-7.5301690581,-2.9813  
146443,-2.7247638712\C,-3.8789693687,-3.7679775204,2.542916253\H,-3.11  
89040872,-4.1897934757,3.226641125\H,-4.5044923812,-3.0639344833,3.120

139616\H,-4.5288848501,-4.5970202662,2.2060084618\C,-7.7669533733,-4.5  
475688633,-1.2650113992\H,-7.1624001524,-5.2251351583,-0.6340512238\H,  
-8.4203236028,-3.9565158549,-0.5984202307\H,-8.4112521372,-5.174185434  
7,-1.9087457674\C,-6.0069562025,-4.4575171418,-3.099498493\H,-6.646593  
327,-5.0742318224,-3.7573236796\H,-5.3883816586,-3.801398066,-3.737468  
9007\H,-5.3277518505,-5.1392233036,-2.5550393329\C,-5.3541807318,1.567  
7249192,-2.1096930504\H,-6.0937950842,1.1459593151,-2.8153018114\H,-5.  
4492046213,2.6688178172,-2.1454722239\H,-4.3433559581,1.2992444855,-2.  
4598993483\C,-6.9896684013,1.4405236039,-0.1563353194\H,-7.1309083373,  
2.5364852403,-0.1926759831\H,-7.7850543464,0.9772387797,-0.7687217519\  
H,-7.1313224961,1.1119509186,0.8891292005\C,5.9060867531,0.3040840727,  
-2.8010291179\H,5.6959035072,0.0224004566,-3.8500452238\C,1.3915320855  
,2.5052127343,-3.6779978464\H,0.435047032,2.5159991316,-3.1271826102\C  
,3.277016392,2.3070400477,1.0898447828\H,2.5938243714,3.1683888875,1.1  
834731717\C,7.116030698,1.2626288414,-2.8059009532\H,8.0067480052,0.76  
86821092,-3.2362710631\H,6.9043418343,2.1695105707,-3.4001467829\H,7.3  
681335766,1.5814281897,-1.7774254031\C,6.2284522493,-0.9877311728,-2.0  
252087325\H,6.4994055201,-0.7693941259,-0.976810715\H,5.3670464375,-1.  
6773765795,-2.0218667271\H,7.0843756246,-1.5127462412,-2.4868878556\C,  
2.6437153266,1.1390288541,1.8747098471\H,1.7003722386,0.8083898804,1.4  
120713067\H,3.3283940966,0.2740731031,1.9015734036\H,2.4300076752,1.43  
76312678,2.9174258571\C,4.6173636721,2.7226055661,1.7236336346\H,5.097  
3979607,3.5424727814,1.1594822809\H,4.4510275708,3.0714949057,2.758920  
5335\H,5.3301364318,1.87911733,1.7740588282\C,1.6822772022,3.941534504  
, -4.1656489734\H,1.7467830244,4.6492650712,-3.3209643706\H,2.640407415  
4,3.9833178273,-4.716886215\H,0.881789784,4.2913307509,-4.8435395636\C  
,1.2014562541,1.5530920647,-4.8709388409\H,0.3387454039,1.8842318778,-  
5.4764357282\H,2.0834355699,1.5361311904,-5.5379029796\H,0.9892262209,  
0.5272668909,-4.5283387677\C,-2.283207208,-4.040401048,0.5787465063\H,  
-2.8448220951,-4.9047226836,0.1793689526\H,-1.7896605596,-3.5201644188  
, -0.2584868929\H,-1.5023882152,-4.4395709695,1.2521867957\H,-2.5627440  
404,-2.2668561844,1.7487794769\O,6.6958123439,-3.0219503697,3.41417450  
52\C,6.8654319844,-3.5636943248,4.734893536\H,6.4741207258,-4.59553490  
64,4.7921683791\H,7.9503036805,-3.5693585306,4.9144657068\H,6.36794910  
64,-2.9292585873,5.4906215141\Version=ES64L-G09RevD.01\State=1-A\HF=-  
3291.2861415\RMSD=2.508e-09\RMSF=3.126e-06\Dipole=4.9932912,-3.3405312  
,4.7549402\Quadrupole=3.8701946,-0.9721312,-2.8980634,-22.4183524,10.5  
214721,-11.9294948\PG=C01 [X(C65H72N1O5P1)]\@

Z-2b/1c (Type I; conf1)

1\1\GINC-LOGIN\FOpt\RTPSSSTPSS\def2SVP/W06\C65H72N1O5P1\JHIOE\22-Nov-20  
15\0\#p scrf=(smd,solvent=ch2cl2,read) rtpsstps/def2svp/w06 densityf  
it opt empiricaldispersion=gd3\title\0,1\P,-1.0915156623,0.049404508  
, -1.4467971124\O,-2.4622980595,0.6962611638,-0.7319818207\O,0.11246404  
82,0.776706057,-0.4913523896\O,-1.0915031088,0.5359647049,-2.865052461  
\O,-0.947066825,-1.4232334545,-1.0668459979\C,-1.8227435105,1.60506225  
53,1.3770418978\C,-2.573418761,0.6853389269,0.6430486045\C,-3.50640716  
17,-0.2211440672,1.2376138092\C,-3.6130832879,-0.2149261796,2.62292731  
71\H,-4.329646498,-0.8843577663,3.1105209633\C,-2.7940805632,0.6199582  
326,3.4374003738\C,-1.8731097,1.5405695834,2.815684657\C,-1.0197551933  
,2.3171640652,3.6569908792\H,-0.2900822132,2.9914685526,3.1991767889\C  
, -1.0915106565,2.2130455823,5.0386245734\H,-0.4196498951,2.8116754513,  
5.6636181384\C,-2.0248116313,1.3330932744,5.6498784537\H,-2.0768194934  
,1.2664886151,6.7421212747\C,-2.8552401118,0.5512165878,4.8622400947\H  
, -3.5668377835,-0.1443095907,5.3218938761\C,-0.95556282,2.5867083487,0  
.6647188626\C,0.0430232007,2.1232258743,-0.1980021478\C,1.0804713575,2

.9740911766,-0.696928332\C,0.9789955817,4.3377118589,-0.4567036698\H,1  
.7706250898,5.0068313926,-0.8106986541\C,-0.1134593324,4.8913539567,0.  
27296089\C,-1.0894883182,4.0071964228,0.8617954269\C,-2.1705364636,4.5  
83363704,1.5953652659\H,-2.9343833328,3.926100116,2.0222710664\C,-2.27  
27758423,5.9575213725,1.7558697717\H,-3.1161631125,6.3777791255,2.3148  
717586\C,-1.2978071169,6.8254855573,1.1945699708\H,-1.3878240242,7.908  
5458756,1.3324079295\C,-0.2426654015,6.2995729167,0.4653758203\H,0.510  
5697044,6.9592197814,0.0196215719\C,5.5223479901,-2.8577144185,2.85036  
55453\C,5.4204962651,-2.2839342749,1.5582027514\H,6.3356552938,-1.9640  
864225,1.0514639766\C,4.1802656104,-2.1201942715,0.9598227736\H,4.1282  
83772,-1.6433203583,-0.0215539438\C,2.9872969653,-2.5024425379,1.63411  
58929\C,3.1032612829,-3.0398316711,2.9383070758\H,2.207046828,-3.33481  
9043,3.4915992892\C,4.3479485644,-3.2368923439,3.5392004295\H,4.398334  
2296,-3.6762513718,4.5380428876\C,1.6646308702,-2.2471611072,1.0634667  
664\C,0.503382901,-1.9359484739,1.9650158092\H,-0.3521730428,-1.575421  
2525,1.3767139698\H,0.7887871691,-1.1854908653,2.7190266335\H,0.198196  
4089,-2.8514531996,2.5038577129\N,1.4081674551,-2.2275756383,-0.227380  
8344\H,0.4271710992,-1.8799232621,-0.5228308623\C,2.2096213484,-2.6218  
588085,-1.3420204156\C,2.2268391934,-1.770777174,-2.4609637002\H,1.709  
2079938,-0.8086872804,-2.4241118429\C,2.9350652366,-2.1545494512,-3.60  
73533813\H,2.9545874012,-1.4854347191,-4.4734213517\C,3.6187334368,-3.  
3793635797,-3.6390059978\C,3.5884611026,-4.227451254,-2.5181942026\H,4  
.1107739692,-5.1896700505,-2.542455508\C,2.8801069502,-3.8590364957,-1  
.3679305724\H,2.8380412,-4.5231402873,-0.4997831369\C,2.3163654924,2.3  
55276451,-1.2826697042\C,2.4361770699,2.0961889618,-2.6713398746\C,3.  
3736287827,2.0111630513,-0.3919425395\C,3.6028492377,1.4632069813,-3.1  
412893837\C,4.5114539669,1.3666693368,-0.9102599831\C,4.642281876,1.07  
32556125,-2.2798498621\H,3.7057988162,1.2556969207,-4.2120903128\H,5.3  
196223272,1.0886873724,-0.2255435096\C,-4.347083564,-1.1164706815,0.37  
96703485\C,-4.1866324259,-2.5284123826,0.4320078438\C,-5.3274962178,-0  
.5482078824,-0.4832709326\C,-5.0234321364,-3.3377220508,-0.3615498624\  
C,-6.1299388668,-1.4007140503,-1.26061205\C,-6.0003550977,-2.800225657  
8,-1.2133483462\H,-4.9043115446,-4.4274286574,-0.3202452202\H,-6.88549  
58353,-0.9558197365,-1.9188336655\H,4.1738635266,-3.675460478,-4.53518  
48151\C,-5.5716824236,0.9607068152,-0.5644014449\H,-4.8332588853,1.463  
6461568,0.0818706927\C,-3.1248648351,-3.2024932324,1.3038255004\C,-6.8  
810101744,-3.7068901352,-2.0689980419\H,-6.6091870812,-4.7503509471,-1  
.8202428768\C,-3.7645958367,-3.9763621213,2.4748432264\H,-2.9834858651  
,-4.410698229,3.1262225168\H,-4.3990087564,-3.3178531299,3.0948730877\  
H,-4.3972715144,-4.8056834404,2.1075316384\C,-6.608329413,-3.497927637  
6,-3.5734162014\H,-6.8655105359,-2.4690017414,-3.8859609889\H,-5.54372  
92677,-3.6688123629,-3.8133541131\H,-7.214125712,-4.1957543523,-4.1804  
652017\C,-8.3782544876,-3.5239765429,-1.7467065965\H,-8.9917285663,-4.  
230107714,-2.3359240627\H,-8.5815631741,-3.7039198383,-0.6758244802\H,  
-8.7188415854,-2.5008350667,-1.9903106063\C,-5.3680707545,1.5002395634  
,-1.9945774898\H,-6.1180052821,1.0878375229,-2.69479524\H,-5.469564071  
,2.6012418733,-2.0066969053\H,-4.3625520204,1.2440364962,-2.3679723916  
\C,-6.968059737,1.324895635,-0.0169342703\H,-7.1164432186,2.4204498739  
,-0.0307584598\H,-7.7710281683,0.8682114794,-0.6244619201\H,-7.0913904  
358,0.9763869403,1.0244017269\C,5.8927590958,0.390278448,-2.8287536138  
\H,5.672850962,0.1069966968,-3.8753061806\C,1.3432774709,2.5468304453,  
-3.6400833303\H,0.3912435373,2.5305689344,-3.0817078941\C,3.2737590724  
,2.3136437548,1.1077143526\H,2.5773425926,3.1620174539,1.220378278\C,7  
.0868413932,1.3686095592,-2.848442695\H,7.9789833511,0.8902899194,-3.2  
933686968\H,6.8523976835,2.2735731456,-3.4370318594\H,7.3485897965,1.6  
886335022,-1.8227411429\C,6.2478756218,-0.8971767119,-2.0601066129\H,6

.5278466491,-0.6765268623,-1.0146119057\H,5.3997116294,-1.6029612689,-  
2.047985447\H,7.1077352491,-1.4053274485,-2.5332182237\C,2.6682726149,  
1.1238943379,1.8816775115\H,1.7262471448,0.7830018348,1.4235421628\H,3  
.3682342976,0.2710251972,1.8891659944\H,2.4601001966,1.4039913453,2.93  
05890406\C,4.6132093202,2.7418964314,1.7346896688\H,5.0736158948,3.578  
7062229,1.1790521171\H,4.4515423447,3.0713328762,2.7770257498\H,5.3407  
934447,1.9101417314,1.7645290865\C,1.6049281746,3.9968319275,-4.103279  
2149\H,1.6685002249,4.6890897563,-3.2457840475\H,2.5555583082,4.064880  
4152,-4.6648851903\H,0.7905353539,4.3465855129,-4.7644192259\C,1.15996  
49539,1.613800933,-4.848865957\H,0.2865745908,1.9408353243,-5.44101650  
5\H,2.0364184788,1.6242869717,-5.5232978918\H,0.9686296677,0.577983579  
6,-4.5241614528\C,-2.1946376231,-4.1116836918,0.4747305435\H,-2.742587  
6666,-4.9669787309,0.0387562549\H,-1.7274802364,-3.5363594967,-0.34111  
70052\H,-1.3934435845,-4.5254505226,1.1147073394\H,-2.4980423352,-2.40  
63651955,1.7365819372\O,6.7716829313,-2.9879005936,3.3395217074\C,6.95  
77435181,-3.5440878168,4.6518385781\H,6.5849511012,-4.5833634826,4.697  
3380076\H,8.0434152344,-3.5333363922,4.8263206362\H,6.4529743432,-2.92  
86655815,5.4184426823\\Version=ES64L-G09RevD.01\State=1-A\HF=-3291.286  
1924\IRMSD=3.580e-09\RMSF=3.589e-06\Dipole=5.0632006,-3.3271268,4.68515  
09\Quadrupole=4.8044028,-1.2426958,-3.561707,-22.8188917,10.5345324,-1  
1.7862542\PG=C01 [X(C65H72N1O5P1)]\@

Z-2b/1c (Type I; conf2)

1\1\GINC-LOGIN\FOpt\RTSPSS\def2SVP\W06\C65H72N1O5P1\JHIOE\22-Nov-20  
15\0\#p scrf=(smd,solvent=ch2cl2,read) rtpsstpss/def2svp/w06 densityf  
it opt empiricaldispersion=gd3\title\0,1\P,-0.9953261815,-0.27124613  
21,-1.269401822\O,-2.3900855347,0.6178470092,-1.0126214089\O,0.1302576  
525,0.7120554573,-0.4659053444\O,-0.7762569991,-0.3100172907,-2.753714  
092\O,-1.0212352474,-1.5290896479,-0.402703081\C,-1.945465045,2.168106  
2973,0.7426279933\C,-2.6571832341,1.0665357685,0.2656882004\C,-3.69036  
20212,0.4138023866,1.0080561976\C,-3.9670108629,0.8961568066,2.2814294  
263\H,-4.7702257964,0.4378163534,2.8677736964\C,-3.2154013022,1.957851  
6335,2.8646091713\C,-2.1748607388,2.5994247086,2.0981281458\C,-1.39251  
79095,3.6116273982,2.7327984726\H,-0.5745697239,4.080757055,2.17825884  
\C,-1.6457372151,3.9950604395,4.0417731881\H,-1.0275553417,4.769251078  
2,4.5096141347\C,-2.6958653259,3.3891521093,4.7824967629\H,-2.89078688  
6,3.7066343019,5.812695608\C,-3.4601264242,2.3878844923,4.2039195679\H  
, -4.2611320025,1.8997512161,4.7709071134\C,-0.9412598492,2.8310572461,  
-0.1381595358\C,0.1130325882,2.0775801117,-0.6667010023\C,1.2380697628  
,2.6796532485,-1.3157393412\C,1.1984021006,4.0471497783,-1.5530090907\  
H,2.0577245031,4.5373078805,-2.0229343982\C,0.0770705865,4.8431685984,  
-1.1787146693\C,-1.0092163207,4.2356387441,-0.450117293\C,-2.125424661  
8,5.0515773101,-0.0929919667\H,-2.9706199289,4.5972113479,0.4329407016  
\C,-2.1585280773,6.3994356812,-0.4193382957\H,-3.0298916794,7.00357138  
68,-0.1434450772\C,-1.0759455132,7.0015940652,-1.1154626988\H,-1.11281  
11841,8.0680730099,-1.3633033659\C,0.0169840218,6.2351657308,-1.488809  
9404\H,0.8533201065,6.6848177715,-2.0360815792\C,5.6181603069,-2.09764  
33179,3.334408356\C,5.4248690002,-1.9032153622,1.9435127606\H,6.301342  
6415,-1.7394095398,1.3095641509\C,4.146056727,-1.9078756124,1.40688288  
98\H,4.0199461683,-1.7227724787,0.3378168677\C,3.0064251823,-2.0859343  
849,2.2385700345\C,3.2123874792,-2.2382541826,3.630293271\H,2.35550079  
, -2.3636553365,4.2988706012\C,4.4962923293,-2.2663275264,4.1779609501\  
H,4.6172231058,-2.412683882,5.2536252035\C,1.6488964827,-1.9905645742,  
1.7040505877\C,0.548596547,-1.4159049087,2.550723806\H,-0.3176942406,-  
1.148509234,1.9278820813\H,0.9013310108,-0.5399469122,3.1157791763\H,0  
.2269385021,-2.1801705031,3.2830841528\N,1.3076002622,-2.3547988626,0.

484246787\H,0.3308686329,-2.0329251428,0.1490070954\C,2.0100601237,-3.1320398419,-0.4842427758\C,1.8731061979,-2.7722282022,-1.8381726719\H,1.2946427791,-1.8872729615,-2.1184534449\C,2.4812048827,-3.5594922515,-2.8248815661\H,2.3820536231,-3.2705374648,-3.8762312164\C,3.2151125294,-4.7009742218,-2.4692028431\C,3.3350357943,-5.0608436948,-1.1157172829\H,3.892325368,-5.9600822571,-0.8325578084\C,2.7316457811,-4.2853756409,-0.1189608931\H,2.8057663494,-4.5749852186,0.9331014363\C,2.4768388435,1.8676130384,-1.562829432\C,2.6904151987,1.1890388334,-2.792553975\C,3.4433335055,1.7905093996,-0.5227623118\C,3.8547921475,0.4141357523,-2.9441095873\C,4.5934055029,1.0045431917,-0.7264671154\C,4.8170379086,0.3039784099,-1.9226744653\H,4.0205741318,-0.1138039866,-3.8890559444\H,5.3415299311,0.9340439157,0.0708132023\C,-4.4490022305,-0.7313494738,0.4089984072\C,-4.3254482026,-2.0413024329,0.9539391882\C,-5.3098245881,-0.5057140517,-0.6999695551\C,-5.0882586078,-3.0837930645,0.3970007561\C,-6.0415321012,-1.5866667091,-1.2270176714\C,-5.952797306,-2.8819037477,-0.6929467459\H,-4.9961595668,-4.0892399211,0.8239014518\H,-6.7087689034,-1.4142611276,-2.0807201132\H,3.6901554948,-5.3126654793,-3.2432462365\C,-5.4953766923,0.8800142774,-1.3219315726\H,-4.8258520813,1.5821415272,-0.797768978\C,-3.3794442326,-2.3626349682,2.1142786468\C,-6.7721029802,-4.0291101903,-1.2785732902\H,-7.3327809638,-3.6188298497,-2.1395234284\C,-4.1602472218,-2.6122827907,3.4215046361\H,-3.4648814339,-2.7959303822,4.2616248083\H,-4.7952271478,-1.7486264789,3.6863677216\H,-4.8173301926,-3.4968072595,3.3266480333\C,-7.8020113613,-4.5604297578,-0.2601219453\H,-7.3002828901,-4.9931380077,0.6252052569\H,-8.4701162865,-3.7529889705,0.0895548638\H,-8.4279046428,-5.3517973835,-0.7124137379\C,-5.8726828498,-5.1667869638,-1.8035994114\H,-6.4812077883,-5.9554548459,-2.2829568537\H,-5.1483121768,-4.7923805209,-2.5487393772\H,-5.3016884008,-5.6369776644,-0.9820139209\C,-5.0978469369,0.8956033916,-2.8117594981\H,-5.7657371419,0.2541778323,-3.4158389233\H,-5.164639304,1.9226988859,-3.2158027367\H,-4.0614240123,0.5413950767,-2.9412361083\C,-6.9352830195,1.3952927084,-1.1153615159\H,-7.0417732601,2.4189341227,-1.5194560844\H,-7.6724993776,0.751304008,-1.6294030248\H,-7.1982147947,1.4225946104,-0.0423500127\C,6.0862477304,-0.5244806957,-2.107932031\H,6.6470627509,-0.468456965,-1.1555181174\C,1.709527671,1.3596660188,-3.9529917597\H,0.7126328405,1.5310884663,-3.5116779344\C,3.2402615046,2.5212175886,0.8081488743\H,2.5298396227,3.344859076,0.6233616239\C,5.775411059,-2.0093225991,-2.3792869973\H,6.7099797892,-2.5958300249,-2.4485542769\H,5.1584696454,-2.4441435591,-1.5744107824\H,5.2273797791,-2.1370491566,-3.3300644377\C,6.9870292991,0.0635121938,-3.2141501721\H,6.4882197811,0.0168695506,-4.1998078995\H,7.2348532986,1.1204342652,-3.0089717347\H,7.9335186327,-0.5031471701,-3.2879652133\C,2.5906841081,1.5910094451,1.8545969016\H,1.666921882,1.1377040511,1.4606446373\H,3.2800055348,0.773747201,2.1321411407\H,2.3355642128,2.1524457402,2.7724641697\C,4.5324018748,3.1528995434,1.3576776113\H,5.0150825732,3.8030637639,0.6058887253\H,4.3032809218,3.7692078946,2.2458797836\H,5.2671189867,2.3887392536,1.6708345372\C,2.089923255,2.6003581601,-4.7916056454\H,2.1168634064,3.5150626117,-4.1749058079\H,3.0883373585,2.4713978382,-5.2499919976\H,1.3575963642,2.7592644466,-5.6047679454\C,1.587132811,0.1203703021,-4.855266169\H,0.7810182202,0.2779317747,-5.593927704\H,2.516953761,-0.0774472207,-5.4201991706\H,1.3279563191,-0.7748405789,-4.2678142466\C,-2.4559217335,-3.5546294371,1.7903708527\H,-3.0243853051,-4.4970132976,1.6886496008\H,-1.9066146893,-3.3695994839,0.8535206013\H,-1.7215588356,-3.7012284372,2.603355762\H,-2.7336770565,-1.4824235809,2.271130904\O,6.8991757352,-2.0944247827,3.7546883511\C,7.1838406004,-2.274049441,5.1521798153\H,6.8161025676,-3.2530816358,5.508752546\H,8.2795055973,-2.238653124,5.2374679774\H,6.7389274



856,-1.4619657842,5.7550943051\\Version=ES64L-G09RevD.01\\State=1-A\\HF=  
-3291.2858785\\RMSD=3.823e-09\\RMSF=3.597e-06\\Dipole=4.8038004,-2.239223  
,5.1860918\\Quadrupole=4.9162314,-6.2732969,1.3570654,-20.5701109,19.41  
14827,-10.4712965\\PG=C01 [X(C65H72N1O5P1)]\\@

Z-2b/1c (Type I; conf3)

1\\1\\GINC-WORKER1\\FOpt\\RTPSSTPSS\\def2SVP\\W06\\C65H72N1O5P1\\JHIOE\\12-Jan-  
2016\\0\\#p scrf=(smd,solvent=ch2cl2,read) rtpsstpss/def2svp/w06 densit  
yfit opt empiricaldispersion=gd3\\title\\0,1\\P,-1.1092296702,0.1711880  
325,-1.524558726\\O,-2.4631444731,0.8663346448,-0.82228515\\O,0.11234678  
09,0.8416826571,-0.5475568589\\O,-1.0745289545,0.6684531513,-2.93866232  
32\\O,-1.0301213428,-1.3081059649,-1.1514398735\\C,-1.8212105922,1.74445  
41553,1.2968778755\\C,-2.5922475088,0.8523150411,0.550708706\\C,-3.55951  
37973,-0.0275524885,1.1306383713\\C,-3.6890262363,-0.0168715692,2.51405  
73426\\H,-4.4334650216,-0.6641609642,2.9896530635\\C,-2.8594044168,0.794  
7439559,3.3417560206\\C,-1.8981431131,1.6834276357,2.7347470031\\C,-1.03  
55516896,2.4339368864,3.5902969452\\H,-0.276935695,3.0843377993,3.14558  
88935\\C,-1.1354623736,2.3361585852,4.9705676945\\H,-0.4560509469,2.9149  
344301,5.6060038963\\C,-2.1068867854,1.4879629699,5.5667586443\\H,-2.180  
3078115,1.4250119476,6.6579643731\\C,-2.9476609995,0.7313987623,4.76550  
58335\\H,-3.6889183463,0.0597845373,5.2137031186\\C,-0.9018413343,2.6894  
993556,0.6006932164\\C,0.0978110291,2.1862979483,-0.2396022368\\C,1.1901  
661971,2.9923915654,-0.694335399\\C,1.1458093904,4.3567252977,-0.439913  
564\\H,1.9808121355,4.9897143997,-0.7591211873\\C,0.0571060792,4.9557983  
139,0.2582141899\\C,-0.9778197404,4.1131803824,0.8049980648\\C,-2.055911  
4657,4.7323287802,1.5074039785\\H,-2.8643097676,4.1078802685,1.90025301  
89\\C,-2.0998181072,6.1080803971,1.6793342815\\H,-2.9419946602,6.5618825  
996,2.2132832077\\C,-1.0664945014,6.934399128,1.161325687\\H,-1.11071597  
25,8.0191587936,1.30791423\\C,-0.0124619791,6.3666870219,0.4623641377\\H  
,0.7847426832,6.9951203717,0.0489546243\\C,5.2812077427,-3.1363954115,2  
.8570930326\\C,5.2345490679,-2.5323757041,1.5783325198\\H,6.149580298,-2  
.2534155934,1.0509491614\\C,4.0022596671,-2.2770295089,0.9803744559\\H,3  
.9906377743,-1.7818228104,0.0065531748\\C,2.7843939409,-2.5888281266,1.  
6345737859\\C,2.8495039061,-3.1553584685,2.9347384422\\H,1.9296728843,-3  
.3966016272,3.4752641106\\C,4.0729475521,-3.4427996087,3.528510442\\H,4.  
1253390401,-3.901675218,4.5203093396\\C,1.4891655967,-2.2382382728,1.04  
88685923\\C,0.3471013034,-1.8320979863,1.9352675094\\H,-0.467351611,-1.3  
986568595,1.3372666631\\H,0.6850486213,-1.1112173962,2.6963034832\\H,-0.  
0405649979,-2.720600214,2.4661722914\\N,1.2532913384,-2.2169227913,-0.2  
445825607\\H,0.3007814936,-1.8134110782,-0.5681029493\\C,2.0580192546,-2  
.6895335716,-1.3271401411\\C,2.2411028043,-1.8384679085,-2.4304020104\\H  
,1.836047036,-0.8232430377,-2.4109272613\\C,2.9751126577,-2.2947476927,  
-3.5337583425\\H,3.1295184184,-1.6280217403,-4.3883575902\\C,3.516984322  
1,-3.5894568542,-3.5369750382\\C,3.3175093351,-4.4361195427,-2.43276285  
04\\H,3.7273725288,-5.4516500059,-2.4370527005\\C,2.5832247094,-3.994587  
531,-1.3253917029\\H,2.4103981891,-4.6499148991,-0.4665713746\\C,2.41831  
01989,2.3297684561,-1.2478654681\\C,2.5612847968,2.0619840188,-2.632640  
3401\\C,3.4475717254,1.9614422005,-0.333711208\\C,3.7250505724,1.4054006  
848,-3.0775716392\\C,4.5833740936,1.2943723475,-0.8276886221\\C,4.740362  
5714,1.0013480351,-2.1947391697\\H,3.8474737986,1.1948243691,-4.1457642  
347\\H,5.3723180037,1.001583945,-0.1268147036\\C,-4.4052057322,-0.902196  
3641,0.256158123\\C,-4.2717524156,-2.3189744991,0.3059509984\\C,-5.35662  
4435,-0.314034523,-0.6221389157\\C,-5.1028944056,-3.1103967154,-0.50673  
03543\\C,-6.1596798378,-1.151984505,-1.4183827982\\C,-6.0543291324,-2.55  
13093146,-1.3771411746\\H,-4.9969026196,-4.2005015743,-0.4622474771\\H,-  
6.8976173646,-0.6985287528,-2.0912630704\\H,4.0916470595,-3.9418242154,

-4.3999757377\C,-5.571217531,1.1992048045,-0.7023417941\H,-4.829478380  
1,1.686829992,-0.048191612\C,-3.2458298893,-3.0134315718,1.2036200173\  
C,-6.9401379596,-3.4312220475,-2.2547162881\H,-7.5964456165,-2.7544565  
433,-2.8336812459\C,-3.9314801943,-3.7427246262,2.3776358578\H,-3.1771  
142815,-4.1919437966,3.0501535591\H,-4.5525348044,-3.0508233364,2.9738  
092834\H,-4.5874750068,-4.5555931671,2.0140712818\C,-7.8459367467,-4.3  
50125035,-1.4093141182\H,-7.2476952103,-5.063430133,-0.8125310762\H,-8  
.4696453063,-3.763103752,-0.7114876519\H,-8.5190088974,-4.9382845612,-  
2.0598936566\C,-6.1064327823,-4.2487998668,-3.2632353011\H,-6.76616639  
42,-4.8374219071,-3.9269915811\H,-5.4848340405,-3.5889147944,-3.894384  
8786\H,-5.4322913202,-4.9558535786,-2.7452536457\C,-5.3440135299,1.738  
8975021,-2.1289377212\H,-6.0912879209,1.3388216515,-2.8389380634\H,-5.  
4306398398,2.8410910332,-2.1397691534\H,-4.3377280553,1.4703562832,-2.  
4919611987\C,-6.9645554483,1.5879425499,-0.1652981283\H,-7.0897441698,  
2.6864338298,-0.1710467896\H,-7.7712781182,1.1527359781,-0.7834628476\  
H,-7.1029197867,1.2332827245,0.8720843478\C,5.9965392048,0.3096523777,  
-2.7185230582\H,5.8092412356,0.0615568606,-3.7803876057\C,1.4975995637  
,2.5299795621,-3.6257431384\H,0.5329525771,2.531156611,-3.0896465203\C  
,3.3180277783,2.2561647017,1.1654115411\H,2.6624470252,3.1379920737,1.  
2668239878\C,7.2077005386,1.2656147014,-2.6666403692\H,8.1056791178,0.  
7860615998,-3.0980232359\H,7.0080252607,2.1938189341,-3.231254015\H,7.  
4410640501,1.5469249094,-1.622940538\C,6.3020985373,-1.0069761572,-1.9  
776521876\H,6.5422646563,-0.8239212378,-0.9146065367\H,5.4452967092,-1  
.7010359743,-2.0233753009\H,7.1740179283,-1.5110247223,-2.4329468723\C  
,2.6283702396,1.0898344583,1.9048108071\H,1.6754089529,0.8156818245,1.  
4255560068\H,3.2753022985,0.1957138451,1.9048822928\H,2.4200137745,1.3  
61527821,2.9558300233\C,4.6560430485,2.6075501489,1.8414580752\H,5.181  
74508,3.4198126484,1.3079227932\H,4.4753676325,2.9413931553,2.87925064  
64\H,5.3345053698,1.7363137895,1.8927659561\C,1.7934486959,3.974095076  
3,-4.0859804885\H,1.8425689918,4.6684700743,-3.229192659\H,2.759921677  
1,4.0266589614,-4.6214215934\H,1.002668669,4.3330848907,-4.7704216605\  
C,1.3263638049,1.5955563331,-4.8350003795\H,0.4719881916,1.9323321432,  
-5.4488523213\H,2.2186212554,1.5895173357,-5.4880930819\H,1.1128019001  
,0.5640278958,-4.5101745266\C,-2.3347960702,-3.9717029512,0.4096574723  
\H,-2.9026656457,-4.8240047697,-0.0065374805\H,-1.8431055878,-3.435865  
1797,-0.4184441202\H,-1.5520394411,-4.3901432689,1.0693157605\H,-2.598  
9672146,-2.2312458847,1.6321607815\O,6.4180978953,-3.4434489309,3.5138  
892824\C,7.6843375259,-3.1564993698,2.8969725965\H,7.806338607,-2.0708  
111247,2.730466031\H,8.4458846251,-3.5088549692,3.6075083294\H,7.79079  
12574,-3.6983696371,1.9398686315\\Version=ES64L-G09RevD.01\State=1-A\H  
F=-3291.2863205\IRMSD=5.374e-09\IRMSF=2.838e-06\Dipole=5.4796889,-3.0811  
753,3.6300334\Quadrupole=21.6585226,-3.3372323,-18.3212903,-19.2188332  
,-1.9982115,-0.658707\PG=C01 [X(C65H72N1O5P1)]\@

Z-2b/1c (Type I; conf4)

1\1\GINC-LOGIN\FOpt\RTPSSSTPSS\def2SVP/W06\C65H72N1O5P1\JHIOE\12-Jan-20  
16\0\#p scrf=(smd,solvent=ch2cl2,read) rtpsstpss/def2svp/w06 densityf  
it opt empiricaldispersion=gd3\title\0,1\p,-1.099150696,0.0914260875  
,-1.4022829741\O,-2.4624328214,0.7810160456,-0.7142663536\O,0.11025555  
45,0.8000537,-0.4395704468\O,-1.0647335726,0.5615450973,-2.825878082\O  
,-0.9990504288,-1.3798773063,-1.0028583238\C,-1.8372147921,1.661167503  
3,1.4100585025\C,-2.5975551154,0.7642333235,0.658610432\C,-3.557647880  
3,-0.1270261637,1.2326839202\C,-3.6922407894,-0.1213245457,2.615701488  
5\H,-4.4330025855,-0.7762420229,3.0865195869\C,-2.8699637616,0.6922310  
854,3.4488690141\C,-1.9141667582,1.5900815303,2.8473570108\C,-1.056316  
0017,2.3412242077,3.7070220515\H,-0.3005414013,2.9971370085,3.26548599

8\C,-1.156800117,2.2364555148,5.0867025113\H,-0.4811295251,2.815884350  
4,5.7255142219\C,-2.1240153486,1.3799801052,5.6778408214\H,-2.19826201  
17,1.3115311787,6.7686657915\C,-2.9591782347,0.6216856931,4.8722409957  
\H,-3.6964597676,-0.0568491597,5.3165281399\C,-0.9330269266,2.62452890  
07,0.7196395315\C,0.0670428431,2.1444242772,-0.1335243587\C,1.13414625  
4,2.9743342612,-0.6036929928\C,1.0708748503,4.3353867769,-0.3360233192  
\H,1.8874138524,4.9866181022,-0.666074137\C,-0.0160921203,4.9095692415  
,0.3848933246\C,-1.0306799234,4.0454489074,0.9359385118\C,-2.111192953  
3,4.64225123,1.6541027223\H,-2.9063518617,4.0028036484,2.0495415028\C,  
-2.1749249467,6.0156564407,1.8379949287\H,-3.0188225681,6.451565492,2.  
3840432239\C,-1.1602994014,6.8627927465,1.3166516065\H,-1.2199603148,7  
.945440177,1.4729970932\C,-0.1052934207,6.3174528116,0.6017855524\H,0.  
6772990709,6.9614693644,0.184461064\C,5.5452123179,-3.132571669,2.6549  
786349\C,5.4237882499,-2.5025200351,1.3935599387\H,6.3062766334,-2.174  
6299314,0.8397389647\C,4.1601028498,-2.2825534465,0.8500739979\H,4.091  
2823203,-1.7649514314,-0.1095668865\C,2.9820034559,-2.6578126042,1.542  
9990276\C,3.1221581333,-3.2504141866,2.8263225738\H,2.2352243585,-3.53  
99926054,3.3970574459\C,4.377835212,-3.5014308106,3.3657910828\H,4.487  
5873168,-3.9788940263,4.3440106307\C,1.6508852626,-2.3430127563,1.0239  
023931\C,0.5252337322,-2.0433870436,1.973321672\H,-0.3308110051,-1.617  
1688314,1.4307015603\H,0.857534795,-1.3516312373,2.7632996603\H,0.1988  
853105,-2.9789704843,2.4633874011\N,1.3566660974,-2.262434666,-0.25605  
81583\H,0.374588061,-1.8834468243,-0.5088485081\C,2.1201840336,-2.6226  
178554,-1.4091470675\C,2.1594106376,-1.7058125524,-2.4740618939\H,1.68  
71050546,-0.7253353772,-2.3695699048\C,2.8305759844,-2.0515356018,-3.6  
545027172\H,2.8672106536,-1.333876246,-4.4802526785\C,3.4563582504,-3.  
3017796512,-3.7717557163\C,3.4052101172,-4.214457689,-2.7035122926\H,3  
.8820070892,-5.1960323422,-2.795526271\C,2.7324064007,-3.8846829752,-1  
.5206083203\H,2.6731155856,-4.5955903905,-0.6914631603\C,2.3559740766,  
2.343793848,-1.2056597943\C,2.4679652735,2.1284674054,-2.6023969491\C,  
3.4136281647,1.9613533317,-0.3307726184\C,3.6317003986,1.5103264965,-3  
.0988498267\C,4.5469133037,1.3309793519,-0.8759429901\C,4.6742567795,1  
.0904169511,-2.2563913932\H,3.731216788,1.3426385072,-4.1768220852\H,5  
.3568156631,1.0251718077,-0.205148626\C,-4.385255517,-1.0143613316,0.3  
537375619\C,-4.2261595967,-2.4267113335,0.4030632793\C,-5.3416357101,-  
0.4420634858,-0.5329295759\C,-5.0401147536,-3.231413587,-0.4173425437\  
C,-6.1246486756,-1.2905608968,-1.3342824227\C,-5.9940420525,-2.6900483  
31,-1.2927064609\H,-4.9215975639,-4.321130649,-0.3793317264\H,-6.86294  
96877,-0.8427260537,-2.0098576687\H,3.9817082013,-3.5682245509,-4.6948  
65049\C,-5.575798464,1.0682007304,-0.6200360806\H,-4.8562870737,1.5668  
934167,0.05071971\C,-3.1933195816,-3.1056649087,1.3047024684\C,-6.8536  
168776,-3.5930535025,-2.1728620155\H,-6.5551374774,-4.6361098315,-1.95  
50284229\C,-3.8721872178,-3.8322944891,2.4846918676\H,-3.1139695436,-4  
.2742371539,3.1576125259\H,-4.4964401923,-3.1418851282,3.0790022812\H,  
-4.5238129917,-4.6506435367,2.1256037593\C,-6.5944898966,-3.3345049223  
,-3.6713797392\H,-6.89004945,-2.307761578,-3.9555426747\H,-5.525220998  
1,-3.4605557265,-3.918190962\H,-7.1766142451,-4.0377488559,-4.29499044  
58\C,-8.3524023266,-3.4534979819,-1.8359561208\H,-8.9553879517,-4.1557  
496173,-2.4405194229\H,-8.5431317873,-3.6684590087,-0.7691830871\H,-8.  
7152803529,-2.4305080966,-2.0466198987\C,-5.3227693284,1.6061236204,-2  
.0432925401\H,-6.0468340178,1.1903106282,-2.7682556846\H,-5.4273211335  
,2.7066960491,-2.0610368941\H,-4.3043660338,1.3520844568,-2.3815896734  
\C,-6.9871894922,1.4401331642,-0.1195031117\H,-7.1272953014,2.53670370  
5,-0.1356261285\H,-7.7721214541,0.9902517022,-0.7550819788\H,-7.146910  
2439,1.0897664236,0.9161816739\C,5.9226307799,0.4288116214,-2.83503866  
84\H,5.7121654497,0.2200232645,-3.900978244\C,1.368886349,2.6040924681

,-3.553117974\H,0.4199524512,2.5720481996,-2.9904295497\C,3.3171929256  
.2.2075911435,1.1796904475\H,2.6521708611,3.0766802559,1.3228472233\C,  
7.1310841436,1.3873563145,-2.7737844784\H,8.0209394341,0.9275022711,-3  
.2419995557\H,6.9168489781,2.3350661819,-3.2993112776\H,7.3865573415,1  
.6305203015,-1.7256814161\C,6.2491124453,-0.9131175287,-2.1510897605\H  
.6.5188778951,-0.7666980832,-1.0897239746\H,5.3909602912,-1.6054779556  
,-2.1967600257\H,7.1079638168,-1.4004780727,-2.6475023939\C,2.66334126  
2,1.0107591547,1.9029549874\H,1.706537893,0.7291150558,1.4357450497\H,  
3.3276139187,0.1300738257,1.8694352588\H,2.4703670698,1.2537117073,2.9  
640342623\C,4.6669970007,2.5573885897,1.8325660847\H,5.1680576826,3.39  
32754344,1.3118983528\H,4.5083944005,2.8557707511,2.8846600865\H,5.357  
9636883,1.6944469844,1.8390103821\C,1.6244273171,4.0652868439,-3.98278  
43989\H,1.6815273762,4.7388608289,-3.1101928799\H,2.575619809,4.151288  
1566,-4.5408095399\H,0.8096550121,4.4254120606,-4.6378714961\C,1.18263  
30276,1.6981628498,-4.7820399619\H,0.3048496729,2.0335104064,-5.363001  
5433\H,2.0561013349,1.7276598898,-5.4594621679\H,0.9977267386,0.655073  
2944,-4.478233743\C,-2.276306493,-4.0649924057,0.5187792777\H,-2.83609  
32606,-4.9295131632,0.1174100853\H,-1.7933848847,-3.5351484035,-0.3182  
456973\H,-1.4863538806,-4.4650599288,1.1809110616\H,-2.5508204296,-2.3  
148816378,1.7251597763\O,6.7186319425,-3.4081166119,3.2583307952\C,7.9  
459247245,-3.0601241871,2.595695132\H,8.0176135623,-1.9678075394,2.444  
6909246\H,8.7498792005,-3.3932135525,3.2678519757\H,8.0332783758,-3.58  
0783835,1.6250441791\Version=ES64L-G09RevD.01\State=1-A\HF=-3291.2864  
156\RMSE=5.281e-09\RMSEF=6.022e-06\Dipole=5.6560607,-2.9947589,3.331241  
5\Quadrupole=22.9162117,-4.6190783,-18.2971334,-20.0853836,-2.4801289,  
-0.9456724\PG=C01 [X(C65H72N1O5P1)]\@

Z-2b/1c (Type I; conf5)

1\1\GINC-WORKER1\FOpt\RTPSSTPSS\def2SVP/W06\C65H72N1O5P1\JHIOE\12-Jan-  
2016\0\#p scrf=(smd,solvent=ch2cl2,read) rtpsstpss/def2svp/w06 densit  
yfit opt empiricaldispersion=gd3\title\0,1\p,-1.0149962185,-0.215584  
2021,-1.319946308\O,-2.407556219,0.6557224233,-0.9978657261\O,0.113164  
3494,0.6952562042,-0.4347008132\O,-0.7913803198,-0.1372984922,-2.80179  
43736\O,-1.048456532,-1.5382365052,-0.5561840411\C,-1.9660247566,2.063  
0143407,0.8749130992\C,-2.6759469763,1.0019888583,0.3121372371\C,-3.70  
77205857,0.2902652992,1.0014672548\C,-3.9854067543,0.6698170794,2.3086  
250845\H,-4.7870603948,0.1648068462,2.8574719835\C,-3.2381386622,1.685  
260778,2.9728806642\C,-2.1985079383,2.387765983,2.2599397079\C,-1.4205  
374172,3.3496429415,2.9731825472\H,-0.6020509775,3.8611643614,2.458653  
4217\C,-1.6786422071,3.6310837115,4.3070053439\H,-1.064176634,4.368991  
2406,4.8345845269\C,-2.7283769738,2.9664458998,4.9963852312\H,-2.92688  
99098,3.2034414138,6.0473292285\C,-3.4869763174,2.0097098005,4.3407306  
032\H,-4.2869299791,1.4761722597,4.8667122461\C,-0.952326256,2.7879259  
335,0.0553931269\C,0.1071780365,2.0730108329,-0.5165638588\C,1.2513845  
923,2.722121299,-1.0823541654\C,1.2215528861,4.1051248612,-1.205371676  
\H,2.0947915631,4.6276408299,-1.6105174126\C,0.0952577386,4.8738984154  
,-0.7928698553\C,-1.0088475511,4.2136062371,-0.1413584824\C,-2.1292839  
526,5.0038929548,0.2582041784\H,-2.988525575,4.5127830162,0.7250923949  
\C,-2.1494699797,6.3744749895,0.0448349107\H,-3.0247683747,6.95861765,  
0.3498521033\C,-1.0488011338,7.0265399866,-0.5737961057\H,-1.075649459  
8,8.1101633092,-0.7323608433\C,0.048811269,6.2872786673,-0.9856827244\  
H,0.8993868047,6.7760627574,-1.4743846886\C,5.471826759,-2.0979633844,  
3.3699093191\C,5.3125754181,-1.8812544536,1.9806019848\H,6.1728906731,  
-1.674196699,1.3401395678\C,4.0377297993,-1.9128313746,1.419250001\H,3  
.9334435076,-1.7049489666,0.3518361468\C,2.8867135085,-2.1397434805,2.  
2129912837\C,3.0614911741,-2.3226628285,3.610185924\H,2.1926195969,-2.

4894678124,4.2537229322\C,4.3301425932,-2.3227971745,4.1771481959\H,4.4700037173,-2.4845014904,5.2501119043\C,1.5433621071,-2.0470248054,1.6429039205\C,0.413238449,-1.5102923692,2.4741352098\H,-0.4427323386,-1.2452480415,1.8364560607\H,0.7359995612,-0.639189171,3.0639532903\H,0.0903788962,-2.2946729226,3.184268671\N,1.2434162621,-2.3778249049,0.4033205306\H,0.2763055196,-2.0518347538,0.0432766631\C,1.9903471915,-3.1062171035,-0.5704596465\C,1.912659951,-2.6778198669,-1.9087701773\H,1.3436255074,-1.7807591452,-2.1673207745\C,2.5686604408,-3.4108137799,-2.9063061402\H,2.5147323477,-3.0684578804,-3.9447837915\C,3.2921924269,-4.5666848349,-2.5768974244\C,3.3517350205,-4.9960634278,-1.2397198927\H,3.9008698707,-5.9068832866,-0.9785094187\C,2.6993597478,-4.2751980545,-0.2326905694\H,2.7267513648,-4.6186470123,0.8049846604\C,2.5014836104,1.9372579841,-1.360573931\C,2.7334183594,1.3275542052,-2.6227432253\C,3.4628400113,1.8184839207,-0.3184478517\C,3.9092450127,0.5774672719,-2.8071151133\C,4.6257201621,1.0618203882,-0.5572650788\C,4.8655468476,0.425704395,-1.7858955444\H,4.0858542228,0.0996372349,-3.7763556966\H,5.3685685275,0.9582279557,0.2408824933\C,-4.4625772589,-0.808009623,0.317315923\C,-4.3385453677,-2.1548247766,0.7635492685\C,-5.3210283131,-0.5017992998,-0.7740230585\C,-5.0965523869,-3.1540413447,0.1270557847\C,-6.047988209,-1.5417953757,-1.383688045\C,-5.9581115761,-2.8730937663,-0.9476362391\H,-5.0031865015,-4.1881916335,0.4782883814\H,-6.713336476,-1.3069882899,-2.2238700163\H,3.8053691068,-5.1359745951,-3.3589186327\C,-5.5105778782,0.9267167731,-1.2882875326\H,-4.8327053772,1.5862420863,-0.7216154105\C,-3.3988642377,-2.5600424475,1.9023344703\C,-6.7667522864,-3.977113513,-1.6232550086\H,-7.3505172904,-3.5010950795,-2.4334217089\C,-4.1873090035,-2.9156043899,3.1802748131\H,-3.4963292532,-3.1557375596,4.0096355269\H,-4.8329178586,-2.0805987504,3.5044294471\H,-4.8346761975,-3.7965321517,3.0127741566\C,-7.7669465023,-4.6260950408,-0.6444456697\H,-7.2415500548,-5.1306735766,0.1874620085\H,-8.4459939556,-3.8712178432,-0.2089202167\H,-8.383064768,-5.3843463819,-1.1619973003\C,-5.8501187409,-5.0381026325,-2.2662157817\H,-6.447893748,-5.7979815665,-2.8023399405\H,-5.1522819563,-4.5772683976,-2.9878531142\H,-5.2489828307,-5.5624261234,-1.5007893699\C,-5.1310178424,1.0550999158,-2.7772742695\H,-5.8052794873,0.46070326,-3.421034298\H,-5.2022862805,2.1095159171,-3.1021855096\H,-4.0958072725,0.7133213178,-2.9454663374\C,-6.9465391536,1.4254023672,-1.0227284379\H,-7.0589513926,2.4760244686,-1.3485432039\H,-7.6920563839,0.8203686708,-1.5709998352\H,-7.1918607161,1.3728124981,0.0534767546\C,6.1389059511,-0.3898945702,-1.998886395\H,6.704581653,-0.3546035062,-1.0483799167\C,1.7610946149,1.5524924529,-3.7808684618\H,0.7555094316,1.6685953952,-3.3418623546\C,3.2407664082,2.4740812676,1.0489999902\H,2.5700923477,3.3360863114,0.8914641857\C,5.8260646113,-1.8684600052,-2.3027354104\H,6.7583413688,-2.4575886135,-2.3791556038\H,5.2006503501,-2.3169541528,-1.5121214464\H,5.2837776944,-1.9725116325,-3.2594303791\C,7.0331866367,0.2233366146,-3.0959421622\H,6.5271364492,0.2041100969,-4.078668549\H,7.2865848276,1.273490604,-2.864984256\H,7.9770194483,-0.3445439059,-3.191670985\C,2.5183369086,1.5098891926,2.013641365\H,1.6036224038,1.1008481222,1.5555284983\H,3.1725745474,0.6609789486,2.2796719415\H,2.2331372258,2.0305132652,2.9464175896\C,4.5330420982,3.017561626,1.6845649521\H,5.072568941,3.6895352983,0.993049577\H,4.2918922031,3.5905791294,2.5981157114\H,5.22313396,2.2062867796,1.9809055146\C,2.1190657542,2.856351928,-4.528399739\H,2.1162381149,3.7272873859,-3.8509682625\H,3.1250470412,2.783699607,-4.9826442357\H,1.3912387268,3.0518419826,-5.3375485055\C,1.6812980464,0.3756323553,-4.7674784346\H,0.8708785001,0.5552702758,-5.4960189307\H,2.6181392236,0.2497454437,-5.3416503916\H,1.4550096132,-0.5680980012,-4.2459190749\C,-2.4638872384,-3.7173398867,1.4958267678\H,-3.02552

06003,-4.6531175749,1.3208738473\H,-1.9093408045,-3.4604213067,0.57910  
60322\H,-1.7341323741,-3.9201247397,2.3010346769\H,-2.7614081267,-1.69  
04414958,2.132405349\O,6.6582608166,-2.0967612987,4.0100047344\C,7.860  
1365681,-1.8433920323,3.2630601654\H,7.8285719451,-0.8457796794,2.7888  
766335\H,8.6764669852,-1.8765055449,3.9990697275\H,8.0210881681,-2.620  
9115649,2.4944673343\Version=ES64L-G09RevD.01\State=1-A\HF=-3291.2860  
152\RMSD=1.679e-09\RMSF=1.306e-05\Dipole=5.2477593,-2.1174415,3.951884  
7\Quadrupole=22.0444871,-5.4816319,-16.5628551,-17.9904895,4.1778209,-  
2.615572\PG=C01 [X(C65H72N1O5P1)]\@

## Solution Phase pcf3-ketimine/TRIP

### *E*-configuration

#### E-2c/1c (Type I; conf0)

1\1\GINC-WORKER\FOpt\RTPSS\def2SVP/W06\C65H69F3N1O4P1\JHIOE\04-Nov  
-2015\0\#p tpsstps/def2svp/w06 densityfit empiricaldispersion=gd3 op  
t scrf=(smd,solvent=ch2cl2,read)\title\0,1P,0.1814632726,-0.5787762  
385,-1.4209212313\O,-1.1408509589,0.3701755896,-1.804394356\O,0.962996  
6921,0.4659338102,-0.3364488495\O,0.9485883706,-0.7660610364,-2.696204  
2887\O,-0.2249236404,-1.7340212939,-0.508200211\C,-1.2324370736,2.2285  
270342,-0.2957748975\C,-1.8211619305,1.0823299157,-0.8381734893\C,-3.1  
461047229,0.6512707332,-0.5107051102\C,-3.8582702014,1.3965485749,0.42  
00638543\H,-4.8818958633,1.103042439,0.6754574481\C,-3.2824188175,2.51  
92748171,1.0816895945\C,-1.9419409524,2.933357046,0.7448236001\C,-1.35  
55492722,3.9957871821,1.4974434046\H,-0.3236468621,4.2916536836,1.2886  
888669\C,-2.0661908848,4.6406445234,2.4992019267\H,-1.5893877063,5.445  
2339308,3.0697898269\C,-3.4019073561,4.2607511998,2.7975668325\H,-3.95  
25821174,4.7787995422,3.5901303062\C,-3.9930014659,3.2173284778,2.1041  
07138\H,-5.009681902,2.8907083633,2.3486581195\C,0.1153399228,2.669147  
9298,-0.7590770248\C,1.1898634324,1.77573897,-0.7086211949\C,2.5456327  
431,2.1685334162,-0.9335866773\C,2.785723694,3.4793503997,-1.320168878  
6\H,3.81525547,3.8155134812,-1.4805897514\C,1.7222812695,4.4076605892,  
-1.5180957221\C,0.3646158893,4.0052311962,-1.2420299351\C,-0.681285069  
5,4.945974369,-1.4867777821\H,-1.7192768935,4.6429050392,-1.3210032828  
\C,-0.4011089917,6.2245775805,-1.9460537441\H,-1.2218593823,6.92574147  
81,-2.1332603898\C,0.9396356506,6.629937112,-2.1834979157\H,1.14819953  
68,7.6445998683,-2.5399616465\C,1.9772979421,5.734240787,-1.9791783874  
\H,3.0146580634,6.0281123599,-2.1761488703\C,-1.7838984642,-0.35436371  
71,4.2201820711\C,-1.3427632132,-1.519592088,4.8661326123\H,-1.8214290  
635,-1.8508388811,5.7912006061\C,-0.2869364339,-2.2564496763,4.3196895  
647\H,0.0492206186,-3.1656632096,4.8254693795\C,0.3066648622,-1.853389  
5708,3.1028381406\C,-0.1377027568,-0.6704396759,2.4696652124\H,0.33894  
62567,-0.3155422317,1.5533846661\C,-1.1725509775,0.077517495,3.0303394  
751\H,-1.5058310372,0.9952039011,2.5386974989\C,1.3987499728,-2.664246  
3398,2.5208047713\C,2.3793494012,-3.3314922182,3.4351503533\H,3.350923  
9566,-3.4823486005,2.9392334215\H,1.9969903909,-4.3209355796,3.7470753  
393\H,2.5117755469,-2.7228149127,4.3423269142\N,1.4823641161,-2.746989  
3651,1.2148198953\H,0.7449842366,-2.2477175775,0.5888507655\C,2.426385  
1895,-3.484887354,0.4329242542\C,2.9664915823,-2.8505713365,-0.7018177  
681\H,2.7205851391,-1.8097137871,-0.9265760791\C,3.8449463347,-3.55870  
80802,-1.5303194965\H,4.2726871199,-3.0577176714,-2.4035794221\C,4.179  
3416514,-4.8902488652,-1.2387069815\C,3.6248474571,-5.5201262107,-0.11  
30791578\H,3.8679423318,-6.5638358107,0.1114420554\C,2.7418211736,-4.8  
258099849,0.7239303825\H,2.2759444882,-5.3322181239,1.572609371\C,3.65  
48082157,1.194423533,-0.6690150831\C,4.3535505506,0.5785630309,-1.7382

372085\C,4.0006692655,0.8936048525,0.6800025707\C,5.4020202134,-0.3143  
153486,-1.4369664386\C,5.0475637389,-0.009629512,0.9261234474\C,5.7614  
184699,-0.6279735982,-0.1174477021\H,5.9466941658,-0.794807076,-2.2580  
230484\H,5.3177684221,-0.239642334,1.9615304995\C,-3.7313870498,-0.553  
3231289,-1.1825381364\C,-4.0134155224,-1.7297170761,-0.4356432476\C,-4  
.0123028197,-0.5175772546,-2.5785019878\C,-4.5827842762,-2.8352632928,  
-1.0981121805\C,-4.5756132687,-1.6497850164,-3.1908694543\C,-4.8716921  
822,-2.8212456473,-2.4711227414\H,-4.8022493777,-3.7440459585,-0.52406  
53764\H,-4.7946503661,-1.6130472904,-4.2644472248\H,4.8669069963,-5.43  
87617301,-1.8909229756\C,-2.9352778848,0.4494451467,4.7729377759\C,-3.  
7651751681,0.7292739679,-3.4313843102\H,-3.2919949105,1.4936904068,-2.  
7928181374\C,-3.7061421886,-1.8503453817,1.0583371964\C,-5.481119317,-  
4.0400256235,-3.1586031046\H,-5.6162269927,-4.8162168061,-2.3818954647  
\C,-5.0016910082,-1.9177378985,1.8923219163\H,-4.769897772,-1.98195297  
85,2.970332884\H,-5.6285068621,-1.0228992898,1.7312629013\H,-5.6026468  
775,-2.8055561647,1.6213325184\C,-4.5361641963,-4.613727921,-4.2344929  
374\H,-4.3676970332,-3.8840022321,-5.0478032819\H,-3.5526023048,-4.873  
8965634,-3.8042521207\H,-4.9666941381,-5.526932592,-4.6852622313\C,-6.  
8701029116,-3.7251630697,-3.7509365835\H,-7.3200761901,-4.6335406753,-  
4.1921290013\H,-7.55831947,-3.3440032602,-2.9751881333\H,-6.8026607229  
,-2.9621872888,-4.5483959798\C,-2.8002630934,0.447937633,-4.6013092552  
\H,-3.2312277672,-0.2766160332,-5.3169971077\H,-2.5913309473,1.3804748  
856,-5.1572669261\H,-1.8418852547,0.0466220422,-4.2321015733\C,-5.0970  
863187,1.3258545081,-3.9338074892\H,-4.9150436496,2.2579123827,-4.5001  
528072\H,-5.6261487161,0.6223469607,-4.6029035398\H,-5.7707306838,1.56  
37668567,-3.0907171284\C,6.8952890728,-1.6073294173,0.1744941849\H,7.1  
56544283,-2.0933576516,-0.7845639939\C,4.0002230531,0.8737720568,-3.19  
68145642\H,3.0037804582,1.3480054043,-3.1992478102\C,3.2859822597,1.58  
06205125,1.8468140188\H,2.2427219064,1.7636800418,1.5355819203\C,8.150  
0023872,-0.865659046,0.6819700039\H,8.982401243,-1.5732230231,0.852613  
3899\H,8.488127696,-0.1077408262,-0.0470893724\H,7.9426670076,-0.34888  
07142,1.6375101904\C,6.472073107,-2.7162078595,1.1591524799\H,6.256346  
2022,-2.3057648731,2.1627223887\H,5.568910102,-3.2411101377,0.80271638  
72\H,7.2805771827,-3.4612498808,1.2719182819\C,3.2301380036,0.72791214  
29,3.1261606889\H,2.8618943964,-0.2897176069,2.91413815\H,4.2206225252  
,0.6372176591,3.607992608\H,2.5477175597,1.1912869977,3.8605463683\C,3  
.9252195114,2.9564418054,2.138591502\H,3.9096224668,3.6051342136,1.245  
5529847\H,3.3798379812,3.4759668174,2.9480450709\H,4.9780392188,2.8369  
94132,2.4547197276\C,5.0075843037,1.8700860581,-3.8093050191\H,5.05023  
5382,2.8101803442,-3.2316685271\H,6.0259620253,1.4387035011,-3.8257142  
667\H,4.7268296833,2.1196393498,-4.8492750818\C,3.8894289321,-0.399392  
8239,-4.0570145784\H,3.5575258437,-0.1324363954,-5.0773080566\H,4.8590  
115706,-0.921620206,-4.154092687\H,3.1431281695,-1.0875322555,-3.62877  
86361\C,-2.7845893297,-3.0499879016,1.3604787361\H,-3.2801631203,-4.01  
29843609,1.1376643493\H,-1.8598623397,-2.9844874663,0.7638450487\H,-2.  
5099998261,-3.0570120484,2.4309621989\H,-3.1611854783,-0.9424347961,1.  
3634369014\F,-2.5880577129,1.7436074057,4.9980899594\F,-3.9829140178,0  
.48048443,3.9003054377\F,-3.4113242707,-0.0454701435,5.9393946966\\Ver  
sion=ES64L-G09RevD.01\State=1-A\HF=-3513.6480916\RMSE=2.814e-09\RMSEF=3  
.200e-06\Dipole=2.6196978,-2.8508304,4.5849001\Quadrupole=-7.7279596,1  
7.9102405,-10.1822809,-16.6338108,8.9741052,-22.5939586\PG=C01 [X(C65H  
69F3N1O4P1)]\@

E-2c/1c (Type I; conf1)

11\GINC-WORKER\FOpt\RTSPSS\def2SVP\W06\C65H69F3N1O4P1\JHIOE\02-Nov  
-2015\0\#p tpsstps/def2svp/w06 densityfit empiricdispersion=gd3 op

t scrf=(smd,solvent=ch2cl2,read)\title\0,1P,-0.109718774,-0.3573603  
171,-1.294242209\O,-1.4059605,0.689443719,-1.4432557164\O,0.8125294974  
,0.510889129,-0.1648483771\O,0.5386069783,-0.4215333245,-2.6453122079\  
O,-0.5021267686,-1.5975479976,-0.4935434475\C,-1.2636000457,2.35902061  
56,0.2670881476\C,-1.9599797521,1.31236728,-0.3437343432\C,-3.27330588  
6,0.9061167639,0.0551453418\C,-3.8584897812,1.5680309049,1.1269077985\  
H,-4.8690848086,1.291053347,1.4450248594\C,-3.1662162699,2.5798026284,  
1.8526551171\C,-1.839423873,2.9697408916,1.4409861864\C,-1.1310452591,  
3.9093754299,2.2499163612\H,-0.1065482205,4.1807818555,1.9797764212\C,  
-1.7140490875,4.4638306586,3.3799043457\H,-1.145403997,5.1740061583,3.  
9902767585\C,-3.0374170943,4.1121249677,3.7572376001\H,-3.4868742848,4  
.5583993702,4.65086276\C,-3.744279808,3.1848827903,3.0092288095\H,-4.7  
525210795,2.8788198181,3.3091259211\C,0.0637007319,2.7858165962,-0.261  
8174201\C,1.0861252558,1.8429508929,-0.401558036\C,2.4418102457,2.1940  
91079,-0.6891361347\C,2.7246838107,3.5270538337,-0.9504348483\H,3.7561  
295648,3.8310208216,-1.1563619494\C,1.7015931799,4.5201267924,-0.96118  
92569\C,0.3491045317,4.1541843305,-0.6164382958\C,-0.6584536574,5.1643  
757658,-0.6688604294\H,-1.6950707649,4.8942932065,-0.4468693674\C,-0.3  
449934697,6.470656411,-1.0149715343\H,-1.1373891649,7.2261106393,-1.05  
63396188\C,0.9928802707,6.835565198,-1.3235870588\H,1.2285915692,7.871  
761472,-1.589640368\C,1.9922638913,5.8754118242,-1.3020662199\H,3.0255  
841466,6.1401241222,-1.5541612564\C,-1.5417975113,-0.7023400352,4.5134  
144505\C,-1.098002335,-1.9477779989,4.9842954445\H,-1.4963207862,-2.35  
82420513,5.9157003817\C,-0.1422436718,-2.6629728061,4.254929129\H,0.19  
63308841,-3.6341801743,4.6257882404\C,0.3446269576,-2.1553367449,3.029  
8504447\C,-0.1013121331,-0.8943221579,2.5733882216\H,0.2962797311,-0.4  
619260434,1.6528843861\C,-1.0329378653,-0.1699429966,3.3159893561\H,-1  
.3654936249,0.8085538489,2.9597321586\C,1.3266493989,-2.9438494846,2.2  
534347511\C,2.35345384,-3.7560704019,2.9810732412\H,3.2565498716,-3.90  
02530192,2.3676532286\H,1.9451065911,-4.752761501,3.2304064132\H,2.617  
551791,-3.2580432972,3.9263172982\N,1.2779071228,-2.8833089926,0.94488  
03605\H,0.5186533558,-2.2797825493,0.4500611943\C,2.0998196674,-3.5766  
401372,0.0007301427\C,2.5981883259,-2.8431784092,-1.0920686712\H,2.417  
7564447,-1.7681105534,-1.1684273414\C,3.3542026046,-3.5009555983,-2.06  
97947129\H,3.7500622858,-2.9269102431,-2.912463901\C,3.6079921315,-4.8  
773456455,-1.9655295909\C,3.0958036608,-5.6036539748,-0.8784654273\H,3  
.2771699843,-6.6805321479,-0.7993671979\C,2.3340079651,-4.9608337532,0  
.1056045483\H,1.8997139007,-5.5330481202,0.9291948958\C,3.502977603,1.  
1370071386,-0.6162092502\C,4.0811814644,0.6006952281,-1.7947592185\C,3  
.9119628409,0.6610772036,0.6633486485\C,5.0679187919,-0.3984332952,-1.  
6704597399\C,4.8907355028,-0.3436610984,0.7314164474\C,5.4776957114,-0  
.8938615728,-0.4233967635\H,5.516066663,-0.8217008705,-2.5767315305\H,  
5.2065778048,-0.7108682971,1.7127817273\C,-3.9772716736,-0.1873921317,  
-0.6890623388\C,-4.2488629151,-1.4320521944,-0.0541442904\C,-4.3746879  
617,0.0185173489,-2.0394651507\C,-4.9191253367,-2.4336505194,-0.779580  
5816\C,-5.0403938615,-1.0178282123,-2.7201597147\C,-5.3218510002,-2.25  
25782247,-2.1137207441\H,-5.1236489161,-3.3905812045,-0.2855833279\H,-  
5.3535568044,-0.8582960799,-3.7593715044\H,4.1999195616,-5.3854412944,  
-2.7339841719\C,-2.5873869336,0.0853348723,5.264191335\C,-4.1427953147  
,1.345810086,-2.7650378311\H,-3.5781705289,2.0097409198,-2.0893048843\  
C,-3.8254391755,-1.7333663197,1.3851889397\C,-6.0275363027,-3.36404478  
94,-2.885857728\H,-6.2587314221,-2.9641305253,-3.8912096803\C,-5.05023  
20327,-1.8464250269,2.3156456218\H,-4.7333239528,-2.0307918626,3.35756  
81306\H,-5.6506891927,-0.9195681199,2.3008355585\H,-5.7079126414,-2.68  
08102595,2.0082609995\C,-7.3609152618,-3.7662087155,-2.2237055741\H,-7  
.1949636763,-4.1965393714,-1.2188091872\H,-8.0318516812,-2.8953388219,



-2.1136412384\H,-7.8835339458,-4.5268342391,-2.8322735541\C,-5.1087054  
949,-4.5901315868,-3.0699865763\H,-5.6090203804,-5.364230879,-3.680598  
145\H,-4.1660920279,-4.3111875069,-3.5737771965\H,-4.8505367346,-5.043  
9163141,-2.095202318\C,-3.2981081819,1.1701490771,-4.0435314734\H,-3.8  
246247598,0.5556823995,-4.7969358917\H,-3.0915384725,2.1546379996,-4.5  
02436576\H,-2.3324769391,0.689964596,-3.8132122528\C,-5.482879048,2.04  
90352983,-3.0686487236\H,-5.3061997029,3.0336125838,-3.5398993439\H,-6  
.1042531837,1.4508887013,-3.7604316288\H,-6.0654063588,2.2121095713,-2  
.1438625093\C,6.5359609513,-1.9895745871,-0.3259719886\H,6.6704241126,  
-2.3986443525,-1.345155072\C,3.6617885902,1.0904952621,-3.1818392236\H  
,2.7026436255,1.622792976,-3.0611909548\C,3.3389406885,1.268693787,1.9  
468603078\H,2.2878367104,1.5407420538,1.7449334408\C,7.8907746272,-1.4  
055853721,0.1280278109\H,8.6697979993,-2.1899061676,0.1505434282\H,8.2  
288819165,-0.6051988651,-0.5541979465\H,7.81263928,-0.9744765333,1.143  
5002159\C,6.0994983696,-3.1509062457,0.5896211474\H,6.0062700925,-2.82  
41495678,1.6414216216\H,5.1275103317,-3.5662829215,0.2716632863\H,6.84  
56806726,-3.9656560708,0.5610938242\C,3.3327221135,0.3024085965,3.1438  
222733\H,2.8826650209,-0.6680677263,2.8770327694\H,4.3518637482,0.1110  
008798,3.5266548782\H,2.744747971,0.7330188195,3.9736397928\C,4.087641  
8329,2.5709244509,2.3093144117\H,4.0435409249,3.3036773514,1.485077510  
5\H,3.6433265616,3.038710756,3.2072432298\H,5.1520377037,2.3604226187,  
2.5219411934\C,4.6962967408,2.0900155743,-3.74196737\H,4.8387598123,2.  
9499966059,-3.064318199\H,5.6797534761,1.6025893199,-3.8786639357\H,4.  
3694501196,2.4788537269,-4.7240236408\C,3.4115375294,-0.0592122852,-4.  
1758494042\H,3.036123603,0.3481126828,-5.1327075646\H,4.3354446149,-0.  
6232176064,-4.4007581331\H,2.6483400163,-0.7486204469,-3.7807104565\C,  
-2.9396218741,-2.9932522246,1.4713166558\H,-3.4951321186,-3.9042343875  
,1.1811240983\H,-2.0626866654,-2.8914583624,0.8109351839\H,-2.58304618  
58,-3.1374977491,2.5073269349\H,-3.2159174618,-0.8877767991,1.74253925  
03\F,-2.1487465604,1.3300440191,5.5879275108\F,-2.9746152331,-0.513784  
3813,6.4143657928\F,-3.71138162,0.2599688152,4.5115553746\\Version=ES6  
4L-G09RevD.01\State=1-A\HF=-3513.6481424\RMSD=4.153e-09\RMSF=3.907e-06  
\Dipole=2.849708,-3.4998936,3.9681325\Quadrupole=-8.0234894,24.4394016  
, -16.4159121,-17.477505,5.1432742,-16.6101589\PG=C01 [X(C65H69F3N1O4P1  
)]\@

E-2c/1c (Type I; conf2)

1\1\GINC-WORKER\FOpt\RTSPSS\def2SVP/W06\C65H69F3N1O4P1\JHIOE\02-Nov  
-2015\0\#p tpsstps/def2svp/w06 densityfit empiricdispersion=gd3 op  
t scrf=(smd,solvent=ch2cl2,read)\title\0,1\P,-0.0418764429,-0.491150  
4009,-1.1857359711\O,-1.2890305834,0.5903358796,-1.4551410454\O,0.8617  
806928,0.3947891052,-0.0531552822\O,0.6666901253,-0.6521590225,-2.4974  
996711\O,-0.528657068,-1.6680881706,-0.3424612153\C,-1.2000608737,2.30  
91864833,0.208041936\C,-1.8944457978,1.2713502588,-0.4193991447\C,-3.2  
535096158,0.9429323334,-0.1138642373\C,-3.8890845472,1.6749873627,0.88  
1101613\H,-4.9365506175,1.4617720593,1.1192957436\C,-3.2085495774,2.68  
13058884,1.6246104523\C,-1.8344918503,2.9894133031,1.3111816643\C,-1.1  
477913419,3.9278344679,2.1397467431\H,-0.0916346755,4.1369193086,1.946  
9810739\C,-1.7937706277,4.5605175767,3.1916572165\H,-1.241833066,5.268  
4943478,3.819654773\C,-3.1613352003,4.2923117421,3.4667412793\H,-3.660  
5610283,4.8006737488,4.2986522423\C,-3.8497957344,3.3663786518,2.70039  
64628\H,-4.8939739543,3.1226385867,2.9247574975\C,0.166240258,2.682607  
8294,-0.2561379538\C,1.1734578426,1.7138082283,-0.3221146783\C,2.54327  
88728,2.0328877833,-0.5730173034\C,2.8612264931,3.35454035,-0.85829508  
56\H,3.9063952981,3.6301322592,-1.0335903139\C,1.8622506874,4.36649282  
43,-0.9390481221\C,0.4904887857,4.0338816968,-0.6433573403\C,-0.494959

9373,5.0591130821,-0.7758405123\H,-1.546025182,4.8167990083,-0.5944259  
133\C,-0.1418579515,6.3476690195,-1.1487047426\H,-0.918044261,7.114072  
7455,-1.2513191152\C,1.2151876541,6.6806884619,-1.4059539146\H,1.48134  
30775,7.703706608,-1.693369222\C,2.1942927531,5.7049457585,-1.30834632  
48\H,3.2428858029,5.9426031885,-1.5208781871\C,-2.0016368898,-0.544332  
9277,4.5005565019\C,-1.6754542887,-1.7976078659,5.0410665167\H,-2.1904  
078082,-2.1637910408,5.9329441742\C,-0.6859993337,-2.5776380849,4.4336  
927827\H,-0.4412628235,-3.555342173,4.8581235489\C,-0.0441053518,-2.12  
48873951,3.2595489162\C,-0.3726371236,-0.8541434697,2.7329559782\H,0.1  
412865905,-0.4639200985,1.8511490406\C,-1.3418721326,-0.0674923889,3.3  
543847307\H,-1.584852919,0.9172806606,2.946415385\C,0.9712676663,-2.97  
60629219,2.6029996656\C,1.8557338192,-3.8481278045,3.4377477717\H,2.79  
90683873,-4.0775496774,2.9188952639\H,1.3442547449,-4.8035858714,3.657  
622526\H,2.064269754,-3.3521339859,4.398038123\N,1.0777811395,-2.91106  
57104,1.2987728378\H,0.3899200895,-2.2951510122,0.7192500443\C,1.96607  
38025,-3.6339425803,0.4413386138\C,2.6252982778,-2.9047342972,-0.56694  
78073\H,2.5219415598,-1.817710906,-0.621836606\C,3.4351447296,-3.58511  
76851,-1.4830413927\H,3.9542951495,-3.0178018452,-2.2607289352\C,3.584  
6581425,-4.9788034667,-1.4006821738\C,2.9167383394,-5.6983442762,-0.39  
7524993\H,3.0182531447,-6.7869831809,-0.3380421115\C,2.0985550727,-5.0  
320434333,0.5249184221\H,1.5411835751,-5.5931989049,1.2795856086\C,3.6  
208711549,0.9957167394,-0.4596044141\C,4.2876566515,0.5210207278,-1.62  
03477088\C,4.0305444152,0.5531665579,0.8290547622\C,5.3995107284,-0.32  
95980768,-1.4664297969\C,5.1446601421,-0.3002112988,0.9279668806\C,5.8  
618136077,-0.7313193296,-0.2017303917\H,5.9237673835,-0.6796596376,-2.  
3629919482\H,5.4865732053,-0.6264410845,1.9166850957\C,-3.9613214208,-  
0.1350582355,-0.8758921408\C,-4.3709411043,-1.3306832951,-0.2207136044  
\C,-4.2416613134,0.0434638017,-2.259129443\C,-5.0625397452,-2.30879652  
06,-0.9582244104\C,-4.9286285217,-0.9704038525,-2.9520806521\C,-5.3519  
704872,-2.1532190944,-2.3246304208\H,-5.3765338007,-3.2263371359,-0.44  
6625598\H,-5.1501546814,-0.8316663034,-4.0174528301\H,4.2196920546,-5.  
5040294589,-2.1217089693\C,-3.0740888592,0.3127558209,5.1267972588\C,-  
3.8623437345,1.3205897881,-3.0120410178\H,-3.2991521881,1.9694074368,-  
2.3212651799\C,-4.0592250874,-1.6122417569,1.2510752976\C,-6.105466887  
1,-3.2286558176,-3.1024247436\H,-6.1720130029,-2.8839567881,-4.1516070  
742\C,-5.3446285692,-1.684563965,2.0996573913\H,-5.0995610814,-1.85923  
89171,3.1625620845\H,-5.9231888868,-0.7459472193,2.0339227238\H,-5.999  
2048186,-2.5102369366,1.7637842236\C,-7.5445800229,-3.4004255912,-2.57  
36821042\H,-7.5439096391,-3.7512413191,-1.5250735799\H,-8.0992804205,-  
2.4457415398,-2.6115331412\H,-8.0975936852,-4.1433098375,-3.1776094212  
\C,-5.3481000702,-4.5724564381,-3.0975230645\H,-5.8730837553,-5.317998  
0749,-3.7225317285\H,-4.3228069546,-4.4550979598,-3.4915562322\H,-5.27  
26451837,-4.9851318667,-2.0745368496\C,-2.9456688827,1.0289569715,-4.2  
171496898\H,-3.4672313572,0.4316299909,-4.9877217122\H,-2.6229201639,1  
.9744916141,-4.6909463252\H,-2.0437323446,0.4795774533,-3.8994220118\C  
, -5.1206500471,2.1065087307,-3.4387117567\H,-4.8361302926,3.0522598495  
, -3.9355922145\H,-5.738210386,1.5247578193,-4.1476642547\H,-5.74993530  
01,2.3557711774,-2.5652763206\C,7.0989248165,-1.6125032883,-0.04157883  
61\H,7.3221192619,-1.6548219761,1.0412646662\C,3.8357341393,0.92542119  
77,-3.0251539329\H,2.8570488092,1.4248993583,-2.9231561931\C,3.3290461  
224,1.0485214532,2.0963177688\H,2.2851644294,1.2820363993,1.8269505822  
\C,6.837098872,-3.0564146644,-0.5159289118\H,7.7292057504,-3.688169863  
9,-0.3495906543\H,5.9899597444,-3.5067512669,0.029449484\H,6.600234266  
5,-3.0840781444,-1.595221727\C,8.3302722339,-1.0116297993,-0.748666389  
9\H,8.1876093763,-0.9736628547,-1.8442562465\H,8.5330605129,0.01607380  
01,-0.3973976893\H,9.2285010598,-1.624824136,-0.5506663002\C,3.2777309

36,-0.0067131088,3.2155894356\H,2.8986426832,-0.9711059426,2.836469804  
5\H,4.2722895255,-0.184707044,3.6631566918\H,2.6083528133,0.330847837,  
4.0267708225\C,3.9765482453,2.3565603918,2.5999020486\H,3.951983844,3.  
1389141916,1.8211975115\H,3.4409808879,2.7405639408,3.4876866836\H,5.0  
322571069,2.1866445889,2.8812720473\C,4.8213401865,1.9308999178,-3.656  
1098931\H,4.9382609014,2.8306873844,-3.0267695642\H,5.8218145036,1.477  
226756,-3.7844908514\H,4.4645787962,2.2537917465,-4.6514906884\C,3.620  
0705795,-0.2938026253,-3.9434431979\H,3.2426283172,0.0397482428,-4.927  
7820964\H,4.5595205312,-0.8490702992,-4.1211160982\H,2.8701782311,-0.9  
744732519,-3.5091253982\C,-3.209009817,-2.8895167376,1.4137898235\H,-3  
.7649312877,-3.7907903565,1.0949578591\H,-2.2873149828,-2.8147065728,0  
.8133548698\H,-2.9274678491,-3.0276585805,2.4735397979\H,-3.4565784363  
,-0.7739970584,1.6359783521\F,-3.5869367383,-0.228924182,6.256038042\F  
,-4.1188156512,0.50822889,4.2723991702\F,-2.607949582,1.5470760391,5.4  
500290871\Version=ES64L-G09RevD.01\State=1-A\HF=-3513.6469425\RMSD=9.  
318e-09\RMSF=3.213e-06\Dipole=2.3518761,-3.3277471,4.3813517\Quadrupol  
e=-8.9481084,22.4705615,-13.5224531,-13.4632073,5.2376344,-21.5536816\  
PG=C01 [X(C65H69F3N1O4P1)]\@

E-2c/1c (Type II; conf0)

1\1\GINC-LOGIN\FOpt\RTSPSS\def2SVP\W06\C65H69F3N1O4P1\JHIOE\02-Nov-  
2015\0\#p tpsstps\def2svp/w06 densityfit empiricaldispersion=gd3 opt  
scrf=(smd,solvent=ch2cl2,read)\title\0,1P,-0.3090596513,-0.6265925  
646,-0.9708526782\O,-1.6291293351,0.3502594044,-1.2904122611\O,0.65281  
02409,0.4691575132,-0.1093314437\O,0.2647211822,-1.0143088231,-2.30014  
5275\O,-0.663111043,-1.6549747901,0.1066741893\C,-1.533646431,2.214579  
5575,0.2019686437\C,-2.1933214288,1.0734148438,-0.2592389496\C,-3.4680  
142044,0.6484058146,0.2301226735\C,-4.0501254339,1.3952428223,1.245456  
9902\H,-5.0387621874,1.1133896304,1.6219270173\C,-3.3794787242,2.50331  
02845,1.8399228161\C,-2.0928302732,2.912983681,1.3323212327\C,-1.40169  
01108,3.9624371702,2.0098795052\H,-0.4058426548,4.2553301704,1.6646889  
9\C,-1.9621607245,4.5947573555,3.1101251266\H,-1.4060915537,5.38844186  
29,3.6210851945\C,-3.2470339663,4.2169373184,3.5841494381\H,-3.6812145  
44,4.7284808974,4.4500527278\C,-3.9383318651,3.1901091535,2.9598575255  
\H,-4.9200551573,2.873339172,3.330066655\C,-0.2693834024,2.65496025,-0  
.4554072266\C,0.8044664947,1.7642780403,-0.5622057501\C,2.0998632575,2  
.1611360385,-1.0205971496\C,2.2626394672,3.4677107487,-1.4599911898\H,  
3.2519350533,3.809239509,-1.7821460231\C,1.1758016885,4.3888876017,-1.  
4948583322\C,-0.1135229388,3.9848994214,-0.9900088913\C,-1.1912132036,  
4.9187910755,-1.066653926\H,-2.1842788859,4.6167281777,-0.7216125767\C  
, -0.9993474334,6.1925731639,-1.5813818404\H,-1.8433890385,6.8890479264  
, -1.6351630077\C,0.2796280189,6.599037732,-2.0476585243\H,0.4190658318  
,7.6095151836,-2.447043201\C,1.3426780055,5.710771559,-2.0069249711\H,  
2.3308328691,6.0063602187,-2.3776830637\C,4.1309082698,-4.1424851755,-  
0.9497054849\C,4.7121874039,-4.1553512341,0.3254076682\H,5.7273380072,  
-4.5341695711,0.4653658705\C,3.9994179582,-3.6520924496,1.4172658832\H  
,4.4851174642,-3.656439091,2.394939963\C,2.6925421865,-3.131886333,1.2  
55447219\C,2.101828286,-3.1866940158,-0.0316925014\H,1.0789775032,-2.8  
389141984,-0.1956182369\C,2.8168498699,-3.6732652511,-1.123953812\H,2.  
3509078408,-3.6822184694,-2.1130522465\C,2.0012191843,-2.529283903,2.4  
163408473\C,2.7034199684,-2.4702633516,3.740255344\H,2.204614773,-1.78  
39822183,4.4372611548\H,3.740380627,-2.1316902578,3.5915702144\H,2.743  
4278177,-3.4755895335,4.1962736304\N,0.8025361694,-2.0046327074,2.2732  
386268\H,0.3215947072,-1.9195260071,1.3092025127\C,-0.0021385059,-1.40  
95465544,3.2983266013\C,-0.5297757377,-0.1281328523,3.0538598471\H,-0.  
2994566342,0.3824967672,2.1151932458\C,-1.3365448829,0.4752718436,4.02

6798281\H,-1.7344089417,1.4783670891,3.8468507507\C,-1.6381323471,-0.2  
029134517,5.21868825\C,-1.1326021941,-1.494566264,5.4388896047\H,-1.38  
28529252,-2.0363038452,6.3568988411\C,-0.313275817,-2.1056196726,4.480  
778758\H,0.060686511,-3.1218376617,4.633240743\C,3.2664825034,1.223613  
3585,-0.9031958695\C,3.6942541209,0.4369598394,-2.0072038815\C,3.95617  
35103,1.1488557663,0.3334109293\C,4.8225199093,-0.3850207549,-1.850236  
0147\C,5.0878914605,0.3149537813,0.4385393136\C,5.5456902404,-0.453967  
2997,-0.6426255754\H,5.1565332494,-0.9968729258,-2.6944407244\H,5.6186  
143027,0.2774794809,1.3951922855\C,-4.1425052347,-0.5474360787,-0.3704  
734503\C,-4.2957238799,-1.7419780471,0.385009896\C,-4.6315442803,-0.48  
61360071,-1.7059629632\C,-4.9703330272,-2.8317161228,-0.1996480534\C,-  
5.2855304106,-1.6069192827,-2.2460802415\C,-5.4717283388,-2.7903169108  
, -1.5101152613\H,-5.0986526196,-3.7526320237,0.3817673495\H,-5.6600944  
394,-1.5531179742,-3.2750805454\H,-2.2764115891,0.2716241057,5.9713774  
222\C,4.9009063336,-4.6150956516,-2.1587110197\C,-4.4882825929,0.76777  
05025,-2.5712263318\H,-3.9410656384,1.5255940591,-1.985924349\C,-3.744  
205961,-1.8856327894,1.8050292277\C,-6.1715521672,-4.0010519931,-2.120  
2823208\H,-6.2198923661,-4.7777514122,-1.3339394783\C,-4.8695504179,-1  
.7887122625,2.8566094444\H,-4.4530692104,-1.8529116523,3.8787917238\H,  
-5.4228227871,-0.8370670538,2.7733697083\H,-5.596001994,-2.6135138951,  
2.732562475\C,-5.3607858766,-4.5795428771,-3.2987465524\H,-5.291147806  
8,-3.8526901358,-4.1291257981\H,-4.3327045178,-4.8359050204,-2.9863879  
547\H,-5.8405392867,-5.4952533496,-3.6907917653\C,-7.6170822672,-3.675  
9251734,-2.54724139\H,-8.1228010425,-4.5814099221,-2.9299445504\H,-8.2  
06553248,-3.2864141266,-1.6978460923\H,-7.6358505524,-2.9166119978,-3.  
350718238\C,-3.6634851234,0.4893811403,-3.8447805014\H,-4.1790261974,-  
0.2253706892,-4.5127654412\H,-3.5084628119,1.4254357413,-4.4126161823\  
H,-2.6750020352,0.0746029708,-3.5859666145\C,-5.8657235275,1.373419122  
8,-2.9124654254\H,-5.7445055771,2.3041077034,-3.4968150929\H,-6.476068  
0256,0.6756500008,-3.5150178681\H,-6.4329775868,1.6153378894,-1.995594  
4251\C,6.8042846198,-1.3198147235,-0.576725738\H,6.5505834383,-2.28365  
4805,-1.0575327661\C,2.9788626836,0.5196294484,-3.3565260125\H,1.94212  
29494,0.840085906,-3.1535079555\C,3.5074591267,1.9546445952,1.55521433  
37\H,2.6009796212,2.5169532714,1.2736818682\C,7.9391219619,-0.68206850  
35,-1.4100809135\H,8.8324124421,-1.3335959759,-1.4171137624\H,7.628057  
7119,-0.5186208256,-2.4569279957\H,8.2310364482,0.2966351185,-0.986035  
4701\C,7.2915586522,-1.6193395516,0.8489742064\H,7.6759445966,-0.70999  
40745,1.3466436043\H,6.4867869492,-2.036106655,1.4786177224\H,8.116523  
1551,-2.3533924639,0.8204587785\C,3.1182001947,1.0301070219,2.72532050  
51\H,2.3482616563,0.3099120513,2.405639309\H,3.9876919073,0.4617839434  
,3.1022671998\H,2.7078142657,1.6169088159,3.5673907084\C,4.5703520987,  
2.988126395,1.9786448311\H,4.8035630735,3.6810433118,1.150352875\H,4.2  
089059722,3.5876550358,2.8343602686\H,5.511806618,2.4961520599,2.28560  
64576\C,3.6468774151,1.5821091916,-4.2565023079\H,3.6613402951,2.57379  
00679,-3.772586397\H,4.6924009049,1.3007933782,-4.4833093911\H,3.10318  
5575,1.678253979,-5.2146382162\C,2.8922378317,-0.8321952182,-4.0877131  
128\H,2.2649761806,-0.7251817072,-4.9914363469\H,3.8839412071,-1.19360  
30148,-4.4160551615\H,2.4259512535,-1.5935603805,-3.4433208021\C,-2.93  
80356025,-3.186921217,1.9886905015\H,-3.5769892758,-4.0841377771,1.896  
1041524\H,-2.1291745987,-3.2475628802,1.2425206629\H,-2.4842491527,-3.  
2085678727,2.9951193725\H,-3.0475750319,-1.0480702659,1.975457752\F,4.  
9971805653,-3.6360835891,-3.1006999775\F,6.1651610083,-4.996764801,-1.  
8576253605\F,4.2964390596,-5.6700682329,-2.7636111644\\Version=ES64L-G  
09RevD.01\State=1-A\HF=-3513.646583\RMSD=3.492e-09\RMSF=5.305e-06\Dipole  
=1.9279515,-1.028613,5.9519416\Quadrupole=-5.2125685,-0.6804513,5.89  
30198,-10.9049677,10.8806442,-18.1562695\PG=C01 [X(C65H69F3N1O4P1)]\@

E-2c/1c (Type II; conf1)

11\GINC-WORKER\FOpt\RTPSSSTPSS\def2SVP\W06\C65H69F3N1O4P1\JHIOE\02-Nov  
-2015\0\#p tpsstps\def2svp\w06 densityfit empiricdispersion=gd3 op  
t scrf=(smd,solvent=ch2cl2,read)\title\0,1P,-0.2736101763,-0.567119  
9497,-1.0457196545\O,-1.5921193455,0.4260952816,-1.3287890314\O,0.6667  
27413,0.4635269538,-0.0850287082\O,0.3331536762,-0.8540307495,-2.38582  
37859\O,-0.6468675165,-1.6717788454,-0.0532890353\C,-1.5012854016,2.22  
2008128,0.247341104\C,-2.1684537781,1.1148148706,-0.2812177392\C,-3.46  
75598073,0.7022591163,0.1498327002\C,-4.0568403992,1.4072381509,1.1908  
363124\H,-5.060601754,1.1301997715,1.5290551437\C,-3.3786493139,2.4703  
452166,1.855216267\C,-2.0747550043,2.8805346379,1.394113213\C,-1.38405  
13753,3.8909140884,2.1288260376\H,-0.3784170241,4.185337201,1.81518740  
56\C,-1.9592936264,4.4849750735,3.2425830817\H,-1.4039066951,5.2491154  
349,3.7974575035\C,-3.2584829143,4.1052578591,3.6741634418\H,-3.703763  
0476,4.5864358528,4.5517542812\C,-3.9507322888,3.115749736,2.993087702  
\H,-4.9447902555,2.7988121942,3.3287465217\C,-0.2173726608,2.672556779  
1,-0.3616764437\C,0.8502088374,1.7762143787,-0.4723088241\C,2.16257507  
36,2.1787894598,-0.8730397135\C,2.3480126544,3.4987760968,-1.260163690  
1\H,3.3495719557,3.8431013352,-1.5384815157\C,1.2680643136,4.427760923  
8,-1.3021906183\C,-0.0376227716,4.0180887577,-0.8473182888\C,-1.108777  
009,4.9589737327,-0.9299819388\H,-2.1129806143,4.652533341,-0.62218568  
07\C,-0.8964140422,6.2434493794,-1.4093314642\H,-1.7354301511,6.945226  
4571,-1.4718479157\C,0.3976025724,6.654382323,-1.8279752801\H,0.552548  
5644,7.673054264,-2.1999312224\C,1.4558929209,5.7608109936,-1.77686146  
78\H,2.4557238121,6.0604288294,-2.1112708944\C,4.2030175645,-4.1327106  
432,-1.0623277515\C,4.7370199132,-4.190771506,0.2318288643\H,5.7463544  
047,-4.5752722269,0.3961622747\C,3.981633726,-3.7316420819,1.313889627  
7\H,4.4262488645,-3.7766057547,2.3097613658\C,2.6798235418,-3.20935885  
06,1.123239861\C,2.1398695532,-3.2075072378,-0.18752539\H,1.1239568957  
, -2.851348819,-0.3763819909\C,2.8959511796,-3.6558259039,-1.2688321108  
\H,2.4688935361,-3.6277498578,-2.275083039\C,1.9366110903,-2.679838030  
5,2.2871562278\C,2.582697892,-2.6937725248,3.6404682234\H,2.0492266043  
, -2.0505261862,4.3527606123\H,3.6225287624,-2.3426305036,3.554369643\H  
,2.6112570931,-3.7223646716,4.0423213675\N,0.7379901613,-2.1616393689,  
2.1282750345\H,0.2942815201,-2.0147518584,1.1525575819\C,-0.1213776742  
, -1.6562690355,3.1563277789\C,-0.6656165388,-0.3701992445,2.9833489211  
\H,-0.4013890217,0.216991645,2.0998674115\C,-1.5390876623,0.1372012063  
,3.9535043086\H,-1.9547168263,1.1413492079,3.8281667586\C,-1.887170520  
9,-0.6384432446,5.070914697\C,-1.3572148443,-1.9300108851,5.2218751596  
\H,-1.6394895737,-2.5461914829,6.08185957\C,-0.4724784454,-2.446322587  
,4.2663379849\H,-0.0776783516,-3.4615810895,4.3631983341\C,3.319629965  
5,1.2301253862,-0.7550442283\C,3.7914264984,0.4994088031,-1.879475339\  
C,3.9633226447,1.0972178183,0.5016062936\C,4.9144028404,-0.3293625819,  
-1.720089296\C,5.0899969058,0.2566667133,0.6093847509\C,5.5902217935,-  
0.4579045893,-0.4902128091\H,5.2838229685,-0.8972895692,-2.5803962808\  
H,5.5838733728,0.1702658335,1.582568559\C,-4.1693640682,-0.4229819122,  
-0.5491515271\C,-4.3744830953,-1.667892729,0.1082140474\C,-4.641610327  
8,-0.2355323409,-1.8766695653\C,-5.0820705367,-2.6815065072,-0.5630935  
147\C,-5.3347977573,-1.2857643853,-2.507325717\C,-5.5712858321,-2.5144  
917916,-1.8705013802\H,-5.2434891768,-3.6378549067,-0.0529740059\H,-5.  
7038704363,-1.1427269664,-3.5305219828\H,-2.5794216281,-0.2392394372,5  
.8196300407\C,5.018779634,-4.5619059676,-2.2571145302\C,-4.4382181039,  
1.0764698422,-2.636300931\H,-3.8819346781,1.7664398146,-1.9798437649\C  
, -3.8415244759,-1.9380106806,1.5165662365\C,-6.3173305888,-3.636120239  
8,-2.5876736011\H,-6.6049817962,-3.247839846,-3.5828767966\C,-4.975678

0191,-1.8986213781,2.5616142738\H,-4.5708167698,-2.0460837989,3.579777  
3454\H,-5.5108459188,-0.9329969682,2.5429944875\H,-5.7153730847,-2.698  
2982203,2.3697236997\C,-7.6122467558,-4.0292607825,-1.8475681688\H,-7.  
3915597541,-4.4444764884,-0.8468345783\H,-8.2759664466,-3.1562088943,-  
1.714312277\H,-8.1665967531,-4.7987680522,-2.4156459852\C,-5.409690433  
7,-4.8635084516,-2.8098155328\H,-5.9414526116,-5.6424007861,-3.3867794  
94\H,-4.4956572371,-4.5870223909,-3.3650247824\H,-5.0995985783,-5.3092  
150348,-1.8467349628\C,-3.5890333735,0.8708585427,-3.9075000618\H,-4.1  
104461357,0.2314444624,-4.6438152246\H,-3.3842732246,1.8426880634,-4.3  
937264\H,-2.6230829199,0.4004841359,-3.6587522959\C,-5.785327441,1.754  
9602173,-2.9614870482\H,-5.6173789305,2.7277008325,-3.4592538117\H,-6.  
39979991,1.1323388778,-3.637512252\H,-6.3710489593,1.9382668663,-2.042  
6722548\C,6.8447771207,-1.3294705469,-0.4197396731\H,6.6023814265,-2.2  
724474913,-0.9461230256\C,3.1273631765,0.6489741503,-3.2491981128\H,2.  
0849644791,0.9638086508,-3.0684239689\C,3.4771491814,1.8568975204,1.73  
80320875\H,2.5878102153,2.4408290303,1.4466790901\C,8.0060744844,-0.66  
41825178,-1.1932502318\H,8.8979581999,-1.3175818139,-1.1967656611\H,7.  
7278846061,-0.4620094302,-2.2425122117\H,8.2863073537,0.2973555774,-0.  
7244161507\C,7.2867788183,-1.6852288402,1.0078559294\H,7.6535163479,-0  
.7955788062,1.5522729093\H,6.4624436119,-2.1255595636,1.5948965326\H,8  
.1129207394,-2.4178915194,0.9778946066\C,3.0377378622,0.8948574938,2.8  
589455761\H,2.2699990557,0.1962691268,2.4888074759\H,3.8889801566,0.30  
43267042,3.2437278917\H,2.6069592096,1.4570717069,3.7077124754\C,4.535  
8790188,2.86179779,2.2350506619\H,4.8078623855,3.5775368294,1.43843982  
21\H,4.1507276864,3.437452401,3.0967488199\H,5.4593056041,2.3475197547  
,2.5594348075\C,3.8320797101,1.7475040144,-4.0749012384\H,3.8341798427  
,2.7167172223,-3.5472485136\H,4.8839291829,1.469955016,-4.275914664\H,  
3.3243104795,1.8898534353,-5.0469068719\C,3.0622221279,-0.6666585414,-  
4.045175454\H,2.4742582682,-0.5138171853,-4.9683569173\H,4.0641538902,  
-1.0218375597,-4.34782053\H,2.5636879066,-1.4523084829,-3.4568363994\C  
, -3.0654657805,-3.2675310427,1.5988722429\H,-3.7222546657,-4.139394180  
4,1.4236017349\H,-2.2494272133,-3.2811921991,0.8581692154\H,-2.6231425  
892,-3.385138298,2.6039703097\H,-3.1284606021,-1.1331700947,1.76103684  
29\F,5.1561614036,-3.547022493,-3.154483832\F,6.2689189364,-4.96130182  
36,-1.9216018421\F,4.434873343,-5.5893558945,-2.9258541561\\Version=ES  
64L-G09RevD.01\State=1-A\HF=-3513.6465234\RMSD=3.516e-09\RMSF=3.711e-0  
6\Dipole=1.7350774,-1.3982855,5.9112919\Quadrupole=-5.01852,1.3626892,  
3.6558308,-10.5910811,9.7601011,-19.1780347\PG=C01 [X(C65H69F3N1O4P1)]  
\\@

E-2c/1c (Type II; conf2)

1\1\GINC-WORKER\FOpt\RTSPSS\def2SVP\W06\C65H69F3N1O4P1\JHIOE\03-Nov  
-2015\0\#p tpsstps/def2svp/w06 densityfit empiricdispersion=gd3 op  
t scrf=(smd,solvent=ch2cl2,read)\title\0,1\p,-0.2973345319,-0.653189  
8973,-0.9733674252\O,-1.6085203615,0.3130624452,-1.3608344421\O,0.6420  
649023,0.4757268125,-0.1278618594\O,0.3136859993,-1.0903718704,-2.2701  
720297\O,-0.6854292521,-1.6325997243,0.1375024378\C,-1.54983062,2.2274  
677858,0.0666647748\C,-2.1935703283,1.0640655273,-0.3603641034\C,-3.46  
43866001,0.6380841756,0.1387164662\C,-4.0623921867,1.4155372684,1.1215  
876801\H,-5.0492121976,1.1358852597,1.5041075737\C,-3.40985882,2.55244  
47637,1.6798423405\C,-2.124698747,2.9601513226,1.1670605632\C,-1.45009  
54147,4.0392984021,1.8141848713\H,-0.4555577176,4.3327834476,1.4657263  
33\C,-2.0250526147,4.7002874077,2.8900140853\H,-1.4815796917,5.5164167  
55,3.3786772292\C,-3.3086087909,4.3230347101,3.368242468\H,-3.75415647  
31,4.8568509705,4.2147081262\C,-3.9839273115,3.268850919,2.773059895\H  
, -4.9643044493,2.9524811223,3.1471428576\C,-0.2735542569,2.6453026083,

-0.5817858383\C,0.8034336656,1.7537951162,-0.6219240392\C,2.1142524085  
.2.1382575005,-1.0448102125\C,2.2892848121,3.423390264,-1.5381791637\H  
.3.2884653674,3.7523418668,-1.8421252087\C,1.2019563537,4.3389477564,-  
1.6465566532\C,-0.1010457217,3.954121941,-1.1612240101\C,-1.1747203671  
.4.8852921815,-1.2981642499\H,-2.1756696829,4.5965114172,-0.9647977114  
\C,-0.9695638227,6.1376355971,-1.8584776939\H,-1.8110549842,6.83217997  
71,-1.9579339121\C,0.3202429937,6.5242441751,-2.3114598707\H,0.4703140  
597,7.5175774836,-2.7483183601\C,1.3811054639,5.637940031,-2.210294252  
6\H,2.3782636375,5.9189723049,-2.5679682725\C,3.8556465329,-4.38711089  
51,-0.9351833454\C,4.5711007577,-4.1980792201,0.2559391258\H,5.6117685  
409,-4.5219958954,0.3322274215\C,3.9526272274,-3.5785172716,1.34538906  
47\H,4.537486483,-3.4292154871,2.2551116653\C,2.6084356296,-3.14028410  
71,1.2658379658\C,1.8921435603,-3.3788273693,0.0662512854\H,0.84496233  
84,-3.081648976,-0.0328591393\C,2.5117527294,-3.9843538524,-1.02502394  
29\H,1.9461576775,-4.1414054329,-1.9478320327\C,1.9904110631,-2.457543  
7954,2.4244038183\C,2.7485931048,-2.363856326,3.7138294728\H,2.2706033  
957,-1.6801944403,4.4271438635\H,3.7691274493,-2.0019048548,3.51005831  
64\H,2.8378037829,-3.3632880225,4.1754204601\N,0.8003911991,-1.9099893  
546,2.3007605284\H,0.3015964845,-1.850181318,1.3429455151\C,0.02978052  
64,-1.2593594104,3.3179046293\C,-0.4980459187,0.0102868168,3.018028675  
3\H,-0.2861254582,0.469271276,2.0488122468\C,-1.2840851531,0.667272222  
4,3.9727109909\H,-1.6841733413,1.6601612378,3.7461960797\C,-1.56313307  
15,0.0539830764,5.2044710212\C,-1.0554726682,-1.2255614769,5.482816427  
8\H,-1.2878545926,-1.7160007969,6.43381043\C,-0.2577769002,-1.89077436  
98,4.5421776497\H,0.1161610924,-2.8991777588,4.7413802214\C,3.27948033  
73,1.2218714561,-0.812302622\C,3.8277467478,0.4378317935,-1.8563872899  
\C,3.8534034499,1.1803694462,0.4890034257\C,4.9763604863,-0.3375807116  
, -1.5947292305\C,4.9867286436,0.3794979655,0.7037848525\C,5.5809162374  
, -0.3739436751,-0.3281717029\H,5.3987106456,-0.9311364421,-2.410241045  
8\H,5.4341965353,0.3499952962,1.704619862\C,-4.1165697774,-0.595015880  
8,-0.4080921824\C,-4.2745004556,-1.7479334719,0.4094428083\C,-4.588072  
5923,-0.6087690786,-1.7509294813\C,-4.9285660494,-2.8746191196,-0.1264  
801433\C,-5.2238753076,-1.7628692599,-2.2398035758\C,-5.4100291274,-2.  
9074975247,-1.4447121727\H,-5.0568938067,-3.764491202,0.501549818\H,-5  
.5880118945,-1.7658976784,-3.2740444835\H,-2.1857614378,0.5691279847,5  
.9434407764\C,4.5118589232,-4.9998489044,-2.1481513578\C,-4.4541409702  
,0.6030105571,-2.6751571875\H,-3.9056992724,1.3901212157,-2.1314148625  
\C,-3.7462141839,-1.8091533864,1.8442637063\C,-6.0867986707,-4.1555861  
374,-2.0046560988\H,-6.1491921656,-4.8903173431,-1.1798677805\C,-4.890  
3596493,-1.6746126191,2.8714314639\H,-4.4894700253,-1.6715649949,3.901  
9368677\H,-5.461900321,-0.7415467366,2.7258196266\H,-5.5986984776,-2.5  
198765182,2.7854894341\C,-5.2427461506,-4.7876255719,-3.1311479504\H,-  
5.1472757169,-4.0980437916,-3.9901864398\H,-4.2244926158,-5.0293832471  
, -2.7776944032\H,-5.7119427038,-5.7198762611,-3.4960334358\C,-7.523389  
9989,-3.864729386,-2.4842157622\H,-8.0128531823,-4.7923610947,-2.83350  
39636\H,-8.1372825542,-3.4379717153,-1.6707702201\H,-7.5268076448,-3.1  
46937865,-3.325087135\C,-3.6387068338,0.2688848047,-3.9410625933\H,-4.  
1557853063,-0.4800818647,-4.5688528247\H,-3.4952963753,1.1774393853,-4  
.5545701937\H,-2.6451023275,-0.1265981865,-3.6714176858\C,-5.837706080  
7,1.1851302116,-3.0328188235\H,-5.7265927894,2.0882068904,-3.660873202  
3\H,-6.4485338878,0.4554857626,-3.5958199773\H,-6.3983787609,1.4664398  
71,-2.1230895976\C,6.8576387143,-1.1664333696,-0.0354453871\H,6.647272  
3458,-1.7848063692,0.8604390195\C,3.2148966007,0.4483253383,-3.2577394  
758\H,2.1775059635,0.8115995139,-3.1539636292\C,3.3026967227,2.0427425  
708,1.6284061483\H,2.3042342279,2.4016750855,1.3268616108\C,7.28741319  
16,-2.112752882,-1.166202049\H,8.1430199041,-2.7301928862,-0.839323256

2\H,6.475420874,-2.7929339342,-1.4686558643\H,7.6080217888,-1.54949604  
,-2.0619388804\C,8.0180467534,-0.2117136553,0.3274142387\H,8.266347420  
9,0.4396138114,-0.5310926297\H,7.7622547777,0.4386120639,1.1822076203\  
H,8.9245380632,-0.7848563259,0.5954099734\C,3.1154795878,1.2596556175,  
2.9397862692\H,2.4745300897,0.3797793749,2.7744263362\H,4.0765669267,0  
.9137730644,3.3610763233\H,2.6284173409,1.8955981472,3.7009223375\C,4.  
1885460325,3.2894934745,1.8351088161\H,4.2652902801,3.8799854603,0.904  
6197102\H,3.7675954577,3.9426186267,2.621795401\H,5.2118369637,3.00129  
90475,2.1396347151\C,3.9751760105,1.4262696382,-4.1789771618\H,3.97697  
9596,2.4506051406,-3.7672642447\H,5.0275199832,1.1093415753,-4.3039421  
701\H,3.508327096,1.4614128223,-5.1807628356\C,3.1384149559,-0.9547731  
86,-3.8878922955\H,2.5874095231,-0.9050500427,-4.8447997009\H,4.140125  
1689,-1.3671970754,-4.1054410028\H,2.5996494184,-1.649073131,-3.223980  
7929\C,-2.9262006917,-3.0867374386,2.1121588034\H,-3.5535741547,-3.995  
9003424,2.069741265\H,-2.1107210926,-3.1834937616,1.3775746408\H,-2.47  
99737932,-3.0410234685,3.1213024041\H,-3.0643095285,-0.9536793762,1.98  
06469413\F,4.6418084072,-4.0892742428,-3.153664376\F,5.7518386273,-5.4  
787914974,-1.8897459368\F,3.7807607127,-6.0264597115,-2.6518626098\Ve  
rsion=ES64L-G09RevD.01\State=1-A\HF=-3513.6457328\RMSD=6.363e-09\RMSF=  
5.780e-06\Dipole=1.9600217,-0.7375567,5.976907\Quadrupole=-3.3418253,-  
2.8894003,6.2312256,-9.284742,11.7396017,-17.5991214\PG=C01 [X(C65H69F  
3N1O4P1)]\@

### Z-configuration

#### Z-2c/1c (Type II; conf0)

1\1\GINC-LOGIN\FOpt\RTSPSS\def2SVP/W06\C65H69F3N1O4P1\JHIOE\03-Nov-  
2015\0\#p tpsstps/def2svp/w06 densityfit empiricaldispersion=gd3 opt  
scrf=(smd,solvent=ch2cl2,read)\title\0,1\P,-0.8145514125,0.22150886  
24,-1.697843681\O,-2.1570998782,1.0018523987,-1.0710828183\O,0.3730636  
907,0.7386978642,-0.5932216352\O,-0.6277246496,0.7629056011,-3.0823427  
789\O,-0.9041500738,-1.2762692122,-1.3990729963\C,-1.5958419475,1.8115  
530468,1.097871224\C,-2.3739498102,0.9808147524,0.2912243317\C,-3.4306  
116401,0.160390168,0.794589574\C,-3.6579347214,0.1753931971,2.16440668  
37\H,-4.477590936,-0.4183406782,2.581231195\C,-2.8389482729,0.92778967  
79,3.0547544781\C,-1.7773818392,1.7494645887,2.5259457525\C,-0.9196571  
308,2.4232244019,3.4472863969\H,-0.0868552919,3.0188042775,3.062365429  
8\C,-1.116028169,2.3150012469,4.8165518666\H,-0.4380513757,2.831634042  
,5.5047630524\C,-2.1846077089,1.5343934058,5.3345138301\H,-2.331904794  
6,1.4619525928,6.4175712274\C,-3.0262522007,0.8546720803,4.4680669392\  
H,-3.8409590574,0.2322918903,4.855131817\C,-0.5538833732,2.6771546413,  
0.4744465438\C,0.4595217602,2.0846361358,-0.2864520299\C,1.6423910991,  
2.7949961794,-0.6685051776\C,1.6736896284,4.1672773784,-0.4573026627\H  
,2.5740538546,4.7302566378,-0.7264269714\C,0.5872780131,4.8596797232,0  
.1523966723\C,-0.5336381522,4.1053198201,0.6579589949\C,-1.5976409379,  
4.8138745483,1.2935582842\H,-2.4651133922,4.2556250821,1.6587275483\C,  
-1.5521044983,6.1931568722,1.4346619514\H,-2.3837348724,6.7176662654,1  
.9180106195\C,-0.4396408143,6.9328950629,0.9506591945\H,-0.4151260906,  
8.0214456199,1.071461715\C,0.6059770164,6.2767321642,0.3199307839\H,1.  
4662570598,6.8375639805,-0.0627601099\C,5.6732205667,-4.1284638803,1.0  
840719892\C,4.9641678447,-3.0557956975,1.6509627228\H,5.3702138971,-2.  
519812316,2.5134503702\C,3.7433589805,-2.6661840047,1.1002137858\H,3.2  
048997914,-1.819404999,1.5293567684\C,3.2262301828,-3.3316496708,-0.03  
34220196\C,3.9550940922,-4.396478701,-0.6049902924\H,3.5715854908,-4.9  
210815517,-1.4842358529\C,5.1674287487,-4.8034891807,-0.0382177067\H,5  
.7234938398,-5.6365619791,-0.4771867601\C,1.9841319524,-2.8393488013,-



0.6738273065\C,1.9462347826,-2.7010272244,-2.163475839\H,0.9981429594,  
-2.2566296341,-2.4982820252\H,2.0644739434,-3.6986611326,-2.624870332\  
H,2.800629817,-2.0867461587,-2.4970667763\N,0.9322421039,-2.459786243,  
0.0055827419\H,0.1455114519,-1.9584678329,-0.5672437817\C,0.6608906628  
,-2.5883257709,1.4027165349\C,0.0659641489,-1.4913864918,2.0511184815\  
H,-0.1425706932,-0.5778336346,1.4879126195\C,-0.2349811235,-1.58301714  
7,3.4164555276\H,-0.6821224811,-0.723761061,3.9257000483\C,0.028186194  
,-2.7686892857,4.1195868933\C,0.5889044107,-3.8716403879,3.4527305794\  
H,0.7738986343,-4.8059754081,3.9928222274\C,0.9082400199,-3.7896444308  
,2.0923163478\H,1.3296969654,-4.6501386447,1.5656811493\C,2.8779070606  
,2.0344545864,-1.0575266129\C,3.147781404,1.6624801652,-2.3985520207\C  
,3.7895799357,1.6867007092,-0.0187060882\C,4.3138454709,0.9227694182,-  
2.6738145632\C,4.9349342356,0.9369079703,-0.3445831604\C,5.2152608042,  
0.5409196704,-1.6646944034\H,4.5341301895,0.6343711087,-3.7080357202\H  
,5.6294636828,0.6580817587,0.4555969438\C,-4.2809464968,-0.6496759363,  
-0.136435162\C,-4.1902396246,-2.0703298824,-0.1435468111\C,-5.20251626  
27,0.0065697465,-0.9959613124\C,-5.058386107,-2.8007951655,-0.97441851  
61\C,-6.0429437229,-0.7715986553,-1.8148188368\C,-5.9972201884,-2.1746  
303208,-1.8136173577\H,-4.994318139,-3.8948622491,-0.9721436571\H,-6.7  
610344265,-0.2682122,-2.4741008819\H,-0.2150903356,-2.8388861404,5.184  
9379506\C,7.0331074375,-4.4890920837,1.6284540985\C,-5.3214272066,1.53  
08214518,-1.0502635892\H,-4.5830127692,1.9550652384,-0.3495649279\C,-3  
.1690516273,-2.8216818037,0.7139318954\C,-6.9288133661,-2.9893272529,-  
2.7065562399\H,-7.5663002996,-2.2682117999,-3.2519391402\C,-3.82758474  
63,-3.454623701,1.9576805558\H,-3.0695080082,-3.9627698743,2.581802514  
8\H,-4.3310324043,-2.6971475071,2.582820197\H,-4.5850414144,-4.2049394  
829,1.6630855869\C,-7.8569728354,-3.9013066446,-1.878216916\H,-7.27747  
75301,-4.6585238907,-1.3182699353\H,-8.444331977,-3.3153896385,-1.1486  
362765\H,-8.5643629406,-4.4387669106,-2.5362704644\C,-6.1403086225,-3.  
8024149032,-3.7539681909\H,-6.8295418296,-4.3368529795,-4.43346752\H,-  
5.4956823567,-3.1451092187,-4.3644161475\H,-5.4933369923,-4.5564026795  
,-3.268672285\C,-4.9821489564,2.0742670405,-2.4536336963\H,-5.71426413  
,1.7311758319,-3.2078003864\H,-4.9966668054,3.1799133989,-2.4513492485  
\H,-3.9771572558,1.7447100599,-2.7666978442\C,-6.7111539722,2.00795033  
7,-0.5800620923\H,-6.7587434288,3.1125320349,-0.5746469384\H,-7.512755  
3796,1.6403482093,-1.2468423722\H,-6.9298834524,1.6512595625,0.4426802  
262\C,6.4868931285,-0.2294203837,-2.0142444912\H,6.3789632757,-0.56868  
71627,-3.0619442796\C,2.228419027,2.1226516457,-3.5276963693\H,1.21667  
03188,2.2287765029,-3.1016739237\C,3.5368018196,2.0930679492,1.4375518  
798\H,2.7789843234,2.8930685664,1.4284670466\C,7.7202807878,0.69730270  
61,-1.9488640023\H,8.6353561952,0.1536081822,-2.2481280695\H,7.6025876  
835,1.5675424301,-2.6190332431\H,7.8719651302,1.0781627026,-0.92176858  
69\C,6.6874735343,-1.4775552518,-1.1348653664\H,6.8558258332,-1.207191  
8283,-0.0773021937\H,5.8085037017,-2.1434096782,-1.1780308955\H,7.5686  
391228,-2.0536255322,-1.4700928451\C,2.9436639702,0.9253334458,2.25213  
69986\H,2.0677199169,0.4923159836,1.7418154339\H,3.6925799655,0.125668  
,2.3956424556\H,2.620604916,1.2693681562,3.2516653681\C,4.7884456173,2  
.6712549653,2.1244428684\H,5.2089837315,3.5150029015,1.548326697\H,4.5  
296819541,3.0417806855,3.1330782131\H,5.5836929067,1.9132307708,2.2468  
42506\C,2.6779034376,3.5059625989,-4.0477616385\H,2.6880090905,4.25574  
73583,-3.2372064925\H,3.6968985633,3.4552760896,-4.4754253536\H,1.9924  
748903,3.8663694352,-4.8370419264\C,2.1149755887,1.1139045355,-4.68270  
827\H,1.3329155608,1.4420825523,-5.389574365\H,3.0595969114,1.02373457  
17,-5.2504458472\H,1.8289422144,0.115679972,-4.3114581171\C,-2.4001244  
759,-3.8881890045,-0.0919239252\H,-3.055077858,-4.7256816924,-0.394663  
7095\H,-1.9527994128,-3.4448220313,-0.9958816028\H,-1.5879747831,-4.31

28419309,0.5251879465\H,-2.4286922845,-2.0824580138,1.062434213\F,8.01  
66025387,-3.7609617846,1.0254630251\F,7.1346223263,-4.2470886593,2.958  
2556825\F,7.340868337,-5.7938528072,1.4310990462\Version=ES64L-G09Rev  
D.01\State=1-AHF=-3513.6411194\RMSD=6.783e-09\RMSF=4.177e-06\Dipole=2  
.5421081,-3.2687769,2.9067657\Quadrupole=-12.9362986,17.4083331,-4.472  
0345,-3.6943372,-14.7658583,13.2084014\PG=C01 [X(C65H69F3N1O4P1)]\@

Z-2c/1c (Type II; conf1)

1\1\GINC-WORKER\FOpt\RTPSSSTPSS\def2SVP\W06\C65H69F3N1O4P1\JHIOE\03-Nov  
-2015\0\#p tpsstps/def2svp/w06 densityfit empiricdispersion=gd3 op  
t scrf=(smd,solvent=ch2cl2,read)\title\0,1P,-0.8385316762,0.2058028  
791,-1.6651382625\O,-2.1950758682,0.9232868533,-0.9951903791\O,0.34989  
11074,0.7340549558,-0.5661549594\O,-0.6922579423,0.7888178301,-3.03749  
79649\O,-0.8741346509,-1.3011142862,-1.4038294366\C,-1.6231643598,1.69  
54281986,1.1839301866\C,-2.3834716275,0.8555790018,0.3699381704\C,-3.3  
940282823,-0.0229050566,0.8702765178\C,-3.5950905554,-0.0525540951,2.2  
43908162\H,-4.3808576473,-0.6908073698,2.6602257279\C,-2.7928707095,0.  
7128487704,3.1387534867\C,-1.7760303957,1.5910189949,2.6128787618\C,-0  
.931643665,2.2787137147,3.5362126948\H,-0.1314232906,2.9180463404,3.15  
22818653\C,-1.1002920396,2.1309549275,4.905477498\H,-0.4334422042,2.66  
0352213,5.5948559754\C,-2.125920124,1.2936570931,5.4216544577\H,-2.251  
6818967,1.1899530313,6.5048719795\C,-2.952533798,0.5986883663,4.552754  
3743\H,-3.7334872298,-0.0667298006,4.937867111\C,-0.6235886723,2.61267  
19073,0.5647757807\C,0.3966502006,2.0740202741,-0.2266023769\C,1.54842  
42847,2.8335401076,-0.6091416467\C,1.5370405739,4.2004084218,-0.363352  
4932\H,2.4131420822,4.8004585475,-0.6325194025\C,0.4376868203,4.840034  
8193,0.2800818785\C,-0.6492224688,4.0356831336,0.7828080601\C,-1.72731  
72438,4.6914619684,1.4504604555\H,-2.5696607263,4.0948192955,1.8138086  
405\C,-1.7270177887,6.0677057642,1.6244950884\H,-2.5689260968,6.551388  
7999,2.1320126211\C,-0.6475875165,6.8567279479,1.1435167741\H,-0.65848  
15746,7.942254657,1.2906210726\C,0.4105389615,6.2524338904,0.482456778  
8\H,1.2453331718,6.8517309449,0.1015922204\C,5.83597227,-3.9975383978,  
0.8839415675\C,5.1103731295,-2.9541627918,1.4834805406\H,5.5207949151,  
-2.4196250559,2.3447813569\C,3.867065909,-2.5910206383,0.9658678006\H,  
3.3138241679,-1.7669786371,1.4197429275\C,3.3436666312,-3.2533142429,-  
0.1665684781\C,4.088424543,-4.2883303334,-0.77108325\H,3.6997782407,-4  
.8100900058,-1.6498057205\C,5.323869256,-4.6696709301,-0.237316461\H,5  
.8926859728,-5.4803504849,-0.7012404641\C,2.0740908855,-2.7851195689,-  
0.7702537597\C,2.0012244763,-2.6120633512,-2.2547715706\H,1.0300679442  
,-2.1976691712,-2.5605876238\H,2.1516072635,-3.5918604387,-2.743996612  
9\H,2.8234600357,-1.9548091125,-2.5876347855\N,1.0261107308,-2.4547904  
284,-0.0598525312\H,0.2119759659,-1.9657901165,-0.6043023227\C,0.79094  
64506,-2.6257640993,1.339351804\C,0.1695473007,-1.5682800492,2.0272717  
605\H,-0.089153418,-0.6512038569,1.4912173428\C,-0.0935923274,-1.70274  
84046,3.396917344\H,-0.5607979322,-0.8736847247,3.9370334116\C,0.23281  
64699,-2.892436809,4.0657630208\C,0.8188685697,-3.9572813879,3.3599319  
455\H,1.053228457,-4.8956506516,3.8732290856\C,1.10106343,-3.831891523  
5,1.9947069073\H,1.5431372312,-4.6629556153,1.4384527374\C,2.800942983  
4,2.1244567366,-1.0392208945\C,3.0587172062,1.7986596409,-2.3945875174  
\C,3.7409234444,1.7767692119,-0.0258563254\C,4.2428693764,1.1050781535  
,-2.7100615573\C,4.9025832798,1.0718456685,-0.3916577427\C,5.173017990  
2,0.7236354784,-1.7272641578\H,4.454938609,0.8543792849,-3.7557749216\  
H,5.6195608482,0.7928154634,0.3884668401\C,-4.2259738807,-0.8415043297  
,-0.0700806825\C,-4.0731346234,-2.253761602,-0.1277994509\C,-5.1906235  
832,-0.1970921933,-0.8937748544\C,-4.9220521064,-2.9914962847,-0.97546  
20056\C,-6.0054021438,-0.9793023348,-1.7309806569\C,-5.8963607624,-2.3

801788073,-1.780707803\H,-4.8176346888,-4.0822582253,-1.0172378613\H,-  
6.7526094798,-0.4787874621,-2.35828471\H,0.0193434487,-2.995934314,5.1  
347938854\C,7.218265275,-4.3288107201,1.3891161476\C,-5.386456397,1.32  
04808073,-0.8806982667\H,-4.6577920387,1.7527888175,-0.1744765746\C,-3  
.0117097423,-2.9896290652,0.6928015175\C,-6.8008552294,-3.2134844422,-  
2.6845011976\H,-6.517262877,-4.2727699851,-2.53729997\C,-3.6252565839,  
-3.6729581557,1.9329553383\H,-2.8378804375,-4.1644908973,2.5336279771\  
H,-4.1463993089,-2.9484329122,2.5819628151\H,-4.3585852706,-4.44540785  
04,1.634577386\C,-6.5840955241,-2.8732673101,-4.1732968397\H,-6.862740  
3836,-1.8251716666,-4.3885992828\H,-5.5265247318,-3.0086724895,-4.4620  
680159\H,-7.2026868432,-3.525423626,-4.8169839213\C,-8.2851712822,-3.0  
677515156,-2.2908537546\H,-8.9202045025,-3.7243054213,-2.9136854889\H,  
-8.4455260001,-3.3398220381,-1.2320922856\H,-8.6360379545,-2.028612271  
6,-2.4320831446\C,-5.1052002098,1.9424407367,-2.2639608463\H,-5.829268  
6562,1.5881303052,-3.0207086618\H,-5.1853165988,3.0441067188,-2.213514  
7846\H,-4.0884783887,1.687468002,-2.6075858915\C,-6.7901534528,1.70020  
99992,-0.3652881162\H,-6.8936205906,2.7989544727,-0.298520835\H,-7.583  
1129564,1.32784962,-1.0397766422\H,-6.9725582715,1.2770948678,0.639035  
9901\C,6.4640069894,0.008789654,-2.1200142524\H,6.358156705,-0.2854479  
453,-3.1814116093\C,2.1060551632,2.2605441359,-3.4951525421\H,1.098756  
8651,2.3222571745,-3.0503794084\C,3.5035870036,2.1402521233,1.44426781  
54\H,2.7208155285,2.9155005508,1.4675370796\C,7.6696234711,0.968359526  
2,-2.0196439319\H,8.5974114057,0.4681441254,-2.3535309115\H,7.51886297  
37,1.8668022741,-2.6444198402\H,7.8207550409,1.3021383948,-0.976195261  
\C,6.709841258,-1.2716010503,-1.3002050884\H,6.874693506,-1.0440964125  
, -0.2320982041\H,5.8533322225,-1.9641118911,-1.3708980792\H,7.60807788  
36,-1.8016112085,-1.6649806734\C,2.9630606599,0.9375669214,2.244149668  
\H,2.094025367,0.4851997878,1.7390827505\H,3.7402547525,0.1609478936,2  
.3618337368\H,2.6442821038,1.2518239437,3.2547946524\C,4.7492319325,2.  
7434877944,2.1206565994\H,5.1302800447,3.6138763153,1.5568154977\H,4.4  
984607488,3.0818042951,3.142567829\H,5.5708752649,2.0093317689,2.20992  
00628\C,2.5031142837,3.6716067244,-3.9822015598\H,2.4992447506,4.39883  
66974,-3.1512695073\H,3.5175070816,3.6660840954,-4.4235020535\H,1.7959  
69256,4.0305827205,-4.7527463707\C,2.0052315162,1.2816245755,-4.676642  
7059\H,1.2011599906,1.6043168994,-5.3610813399\H,2.9425302006,1.238340  
1461,-5.2617661415\H,1.7576761897,0.2645928359,-4.3294500413\C,-2.2211  
076089,-4.0113269033,-0.1490015421\H,-2.8523800522,-4.8633394054,-0.46  
11200839\H,-1.8024488279,-3.53325885,-1.0490488289\H,-1.3863525496,-4.  
4229382042,0.446369652\H,-2.2909939695,-2.2330917702,1.0451998266\F,8.  
1680814422,-3.5808073327,0.7573232178\F,7.5473040806,-5.6270557931,1.1  
820188347\F,7.354092445,-4.0848251263,2.7154330175\\Version=ES64L-G09R  
evD.01\State=1-A\HF=-3513.6411936\RMSE=2.740e-09\RMSF=1.665e-06\Dipole  
=2.6872539,-3.2291919,2.7770007\Quadrupole=-13.3835007,16.7043339,-3.3  
208332,-4.3719499,-14.8659218,13.0931419\PG=C01 [X(C65H69F3N1O4P1)]\@

Z-2c/1c (Type II; conf2)

1\1\GINC-LOGIN\FOpt\RTPSSSTPSS\def2SVP/W06\C65H69F3N1O4P1\JHIOE\04-Nov-  
2015\0\#p tpsstps/def2svp/w06 densityfit empiricaldispersion=gd3 opt  
scrf=(smd,solvent=ch2cl2,read)\title\0,1\P,-0.7874149284,0.22628034  
98,-1.6259996263\O,-2.0706616353,1.1115262042,-1.0214850983\O,0.413482  
7813,0.6514924458,-0.5032426239\O,-0.5369256679,0.7411256897,-3.010223  
6749\O,-0.9806107609,-1.2602207958,-1.316405964\C,-1.5301897732,1.7844  
038075,1.2022871668\C,-2.3407314421,1.0539918385,0.3310060536\C,-3.474  
173752,0.2928485459,0.7571839107\C,-3.7701785437,0.2877994168,2.113739  
238\H,-4.650195965,-0.2566722186,2.470656785\C,-2.9382872938,0.9414331  
492,3.0671408315\C,-1.7817605357,1.678355953,2.6194904738\C,-0.9086490

986,2.2258297191,3.6075218931\H,-0.0019743147,2.7460198171,3.287920416  
5\C,-1.1811310922,2.0882096384,4.9608908995\H,-0.4887229439,2.50838214  
08,5.6986221243\C,-2.3455687741,1.4017475862,5.3981252781\H,-2.5538392  
617,1.306458034,6.4693383543\C,-3.2027979828,0.8378595377,4.4663901189  
\H,-4.0910524538,0.2834620167,4.7893928892\C,-0.3933446284,2.587711015  
4,0.6648914651\C,0.5868361652,1.9647701594,-0.1168748973\C,1.840857782  
2,2.5872771038,-0.4174288\C,2.0122480538,3.915372674,-0.0544953194\H,2  
.9627633443,4.4141435551,-0.2691613193\C,0.9847832092,4.6543975652,0.6  
002821575\C,-0.2354007326,3.9857241031,0.9778343035\C,-1.2523433996,4.  
7497977146,1.6266417546\H,-2.1959929025,4.2640206421,1.8923488481\C,-1  
.0663925376,6.0958102988,1.9062024686\H,-1.8647606033,6.6638970322,2.3  
963458014\C,0.1468532625,6.7466725678,1.5547550094\H,0.2825566282,7.80  
90030352,1.7851180023\C,1.1486925253,6.0377668997,0.9108365495\H,2.084  
7769244,6.5300201089,0.6234557909\C,5.6707189036,-3.9066530163,1.20867  
28893\C,4.9345728336,-2.8571646802,1.7836479224\H,5.3318009267,-2.3106  
334162,2.6434557452\C,3.6958728318,-2.5047334071,1.2446219231\H,3.1302  
734003,-1.6814957202,1.6848611797\C,3.1984960161,-3.1774807674,0.10762  
20154\C,3.9434659067,-4.2325335203,-0.4589420234\H,3.5639635353,-4.768  
3371791,-1.333361548\C,5.1682848861,-4.6078417392,0.1006533969\H,5.741  
5635135,-5.4288107392,-0.3391617159\C,1.9611278497,-2.6946160589,-0.55  
12390322\C,2.0064474798,-2.4053985582,-2.0180864328\H,1.0118287725,-2.  
157473526,-2.4147012025\H,2.4306754164,-3.2657213184,-2.5629715022\H,2  
.6933053955,-1.5527827901,-2.1800055302\N,0.8633258233,-2.4190950394,0  
.1020498235\H,0.0697105395,-1.9308056704,-0.4751035057\C,0.5478376482,  
-2.6402894195,1.4774337859\C,-0.1613895451,-1.6245654413,2.1434727686\  
H,-0.4146019914,-0.7039053568,1.6111360745\C,-0.5235133512,-1.80624144  
69,3.4843769534\H,-1.0659705476,-1.0115624303,4.0058913632\C,-0.200997  
4295,-3.001181339,4.1462460101\C,0.4840598063,-4.0206819232,3.46309321  
4\H,0.7195030794,-4.9616952815,3.9711018508\C,0.8623886229,-3.84859998  
72,2.1261010724\H,1.3773571854,-4.6477083638,1.5861605191\C,2.96535486  
99,1.7816487047,-1.0034952221\C,3.1126059614,1.6850926796,-2.414635493  
1\C,3.8909646246,1.1217014081,-0.1458855576\C,4.1733159106,0.924705088  
5,-2.942948035\C,4.9310091205,0.3710750208,-0.7309324166\C,5.095282489  
1,0.2564720545,-2.120836002\H,4.2913915511,0.8514462003,-4.0297947353\  
H,5.6368244299,-0.1379370638,-0.0630728923\C,-4.3101790571,-0.46103268  
27,-0.2323849771\C,-4.3125675841,-1.8857005308,-0.226997137\C,-5.11755  
47207,0.2449661713,-1.1636762133\C,-5.1509371838,-2.5656435263,-1.1281  
926868\C,-5.9309925232,-0.4847085728,-2.0515955292\C,-5.9706036797,-1.  
8878490917,-2.0480806383\H,-5.1552293431,-3.6616105527,-1.1178669529\H  
,-6.5599647686,0.0580543706,-2.7679849238\H,-0.4923641561,-3.143859728  
9,5.1921122149\C,7.0575902267,-4.214323704,1.7151007157\C,-5.152975793  
9,1.7735156045,-1.2164351395\H,-4.4357053911,2.1547483393,-0.470709382  
6\C,-3.4161367063,-2.6964484299,0.7124874835\C,-6.8722425342,-2.649324  
3675,-3.0161370591\H,-7.3770028965,-1.8955953634,-3.6494126639\C,-4.21  
57502726,-3.299122046,1.8865680598\H,-3.5415520922,-3.8400665962,2.576  
3340562\H,-4.7416421278,-2.5208306681,2.4663029105\H,-4.9743770846,-4.  
0157836106,1.5199309209\C,-7.9652584464,-3.4385569681,-2.2660100363\H,  
-7.5208676683,-4.2084802065,-1.6084728979\H,-8.5794407296,-2.769598663  
6,-1.6367236303\H,-8.6367944901,-3.9514070423,-2.9790112045\C,-6.05896  
73448,-3.5733972299,-3.9455438182\H,-6.7209554989,-4.0655062566,-4.681  
5557944\H,-5.2904312108,-3.0050777216,-4.4992596347\H,-5.5461246992,-4  
.3669967236,-3.3716511508\C,-4.7079898197,2.307362692,-2.5932893854\H,  
-5.4165388921,2.0139394292,-3.3899455717\H,-4.6600700016,3.4119998315,  
-2.5791861223\H,-3.7078608613,1.9233166546,-2.8553676202\C,-6.54259697  
84,2.3162128676,-0.8220939015\H,-6.5388025508,3.4217841245,-0.81383331  
33\H,-7.3211196025,1.9875364679,-1.5349857146\H,-6.8355175573,1.968092

7861,0.1849244551\C,6.2484820032,-0.5449428754,-2.7189434673\H,6.11247  
41331,-0.5368576371,-3.8167510929\C,2.1780405468,2.4502309351,-3.35287  
31302\H,1.2065467232,2.5476240125,-2.8390122807\C,3.9219513192,1.20776  
91547,1.3891542991\H,4.5488022988,0.3502577365,1.6947336498\C,7.607249  
2297,0.1171743659,-2.4073766032\H,8.4320047057,-0.437045198,-2.8920292  
032\H,7.6370036276,1.1612149756,-2.7669028919\H,7.8008086258,0.1264143  
302,-1.3186523119\C,6.2358231127,-2.0141877425,-2.2529244287\H,6.40641  
066,-2.0937044798,-1.1641908021\H,5.2710789935,-2.4987855082,-2.482716  
7331\H,7.0350090697,-2.5890715533,-2.7558397205\C,4.6680176911,2.47617  
98836,1.8600421941\H,5.6622491014,2.5547218524,1.3852928767\H,4.097629  
5257,3.3889591483,1.6146214811\H,4.811456143,2.4518813221,2.9562688185  
\C,2.5825048383,1.053861317,2.1373577047\H,1.9418937781,0.2809839438,1  
.6822771717\H,2.7780083352,0.759625405,3.1845476188\H,2.0095710436,1.9  
943805496,2.1627855124\C,2.7305854762,3.8680027848,-3.6200172005\H,2.8  
774814319,4.4317336599,-2.6828266437\H,3.7057786418,3.8142766244,-4.13  
94148976\H,2.033845668,4.4420123508,-4.2585195866\C,1.9066292237,1.721  
9237153,-4.6805554439\H,1.1171170807,2.2532185401,-5.2412146313\H,2.80  
3473791,1.6893803776,-5.3266369219\H,1.5526478279,0.6941235888,-4.5020  
194865\C,-2.6350127956,-3.799537101,-0.0295388161\H,-3.302760923,-4.60  
39074411,-0.3892795391\H,-2.0928028549,-3.3777091132,-0.8907341125\H,-  
1.8991724784,-4.2632091133,0.6521758057\H,-2.6717449897,-2.0016494092,  
1.134060521\F,8.0000514085,-3.5213794817,1.0126116739\F,7.3729170017,-  
5.5269569649,1.5929593901\F,7.2213539277,-3.8794052784,3.01783289\Ver  
sion=ES64L-G09RevD.01\State=1-A\HF=-3513.6399301\RMSE=8.508e-09\RMSE=1  
.912e-06\Dipole=2.5170886,-3.1192182,2.9213827\Quadrupole=-11.8023807,  
14.9443711,-3.1419904,-2.9768099,-14.7376395,10.745599\PG=C01 [X(C65H6  
9F3N1O4P1)]\@

Z-2c/1c (Type II; conf3)

1\1\GINC-WORKER\FOpt\RTSPSS\def2SVP\W06\C65H69F3N1O4P1\JHIOE\03-Nov  
-2015\0\#p tpsstps/def2svp/w06 densityfit empiricdispersion=gd3 op  
t scrf=(smd,solvent=ch2cl2,read)\title\0,1\P,-0.8056026502,0.0237071  
272,-1.6466684525\O,-2.1754333688,0.8696424417,-1.1908661844\O,0.33264  
02237,0.6982036679,-0.576980543\O,-0.5559811993,0.3683211113,-3.083525  
8396\O,-0.9008851252,-1.4179555791,-1.1423993747\C,-1.7206243846,1.940  
6499395,0.8876265306\C,-2.4552210394,1.0084728588,0.1541428832\C,-3.51  
61463676,0.2266768386,0.7089911404\C,-3.8042259903,0.404374818,2.05614  
56868\H,-4.6294946093,-0.1547625304,2.5083129018\C,-3.031197172,1.2686  
19159,2.8843535039\C,-1.9572498999,2.0388858223,2.3061828104\C,-1.1401  
345954,2.8217661037,3.1768396906\H,-0.2951639254,3.3765709575,2.759359  
7174\C,-1.3874628942,2.8663335338,4.5412256695\H,-0.7391513464,3.46461  
00365,5.190797338\C,-2.4690175502,2.136704934,5.1039620507\H,-2.657219  
0879,2.1847892775,6.1820422982\C,-3.2713705264,1.3529919148,4.28934920  
67\H,-4.094673112,0.7678794416,4.7147120761\C,-0.6516549087,2.73720931  
26,0.2192755329\C,0.4011000997,2.0684822759,-0.4141695607\C,1.61518922  
97,2.7316537588,-0.7867176319\C,1.6550215267,4.1164357502,-0.696587740  
6\H,2.5775037928,4.6454837038,-0.9594262162\C,0.5387113573,4.870952042  
3,-0.2300783715\C,-0.6264107482,4.1762791813,0.2606250058\C,-1.7236572  
04,4.9495845051,0.7463738737\H,-2.6235314767,4.4347672906,1.0969723383  
\C,-1.6690219564,6.3357032834,0.7608333524\H,-2.5266030516,6.909448730  
8,1.1292540876\C,-0.5131253782,7.0181409508,0.2948628994\H,-0.48100488  
64,8.1129689244,0.315313106\C,0.5661860392,6.2972638134,-0.1922682766\H,  
1.4602654029,6.8131593944,-0.5607872469\C,5.9986456772,-3.4121087651  
,1.2895518277\C,5.1745507231,-2.4085746608,1.827337985\H,5.545269621,-  
1.7554155824,2.6223237108\C,3.8874992144,-2.2273632522,1.3210153029\H,  
3.2631061851,-1.4242711946,1.7154451726\C,3.4121617398,-3.035557095,0.

2647370442\C,4.24825802,-4.0426135981,-0.2638745894\H,3.8982962283,-4.6825545015,-1.0781261784\C,5.5318258069,-4.238619396,0.2550145001\H,6.1755467378,-5.019389181,-0.1592616288\C,2.10959939,-2.7264571379,-0.3700849921\C,2.0363565913,-2.6964121237,-1.864923573\H,1.0162237066,-2.4832981037,-2.2138185245\H,2.3815994939,-3.6581005586,-2.2822133028\H,2.7288787622,-1.9164438991,-2.2319819264\N,1.0389924841,-2.3769170363,0.2975718225\H,0.2118534655,-1.9891820812,-0.3032334544\C,0.7775232173,-2.3762420442,1.700481191\C,0.0076864028,-1.3105690756,2.2037494297\H,-0.3268806533,-0.5183372499,1.5284596003\C,-0.3106048437,-1.2763750281,3.5674002888\H,-0.8993877835,-0.4414359509,3.9601400485\C,0.1135478435,-2.310032563,4.4164336692\C,0.854958367,-3.3862157014,3.8976864803\H,1.1673959724,-4.2055723426,4.5534424935\C,1.1898360437,-3.4284770632,2.5391652668\H,1.7481006372,-4.2745166578,2.1293134525\C,2.8396983358,1.9040484932,-1.0492620024\C,3.1257478973,1.3795054024,-2.3341366054\C,3.6934235202,1.6073270513,0.0538372863\C,4.2227994919,0.508270554,-2.4864104394\C,4.7686652367,0.7259352999,-0.1498783411\C,5.0400712107,0.1448272462,-1.4027703186\H,4.4328175312,0.0975346313,-3.4776140059\H,5.4136074878,0.4661599562,0.6967534527\C,-4.2817709764,-0.7378211887,-0.1459375217\C,4.1547394452,-2.1409666269,0.0672926142\C,-5.143733473,-0.2522626937,-1.165582131\C,-4.9201900224,-3.0189439105,-0.7201333894\C,-5.8806817612,-1.1750823843,-1.9326705809\C,-5.7905874095,-2.5603827941,-1.7251013867\H,-4.8248491068,-4.0977527623,-0.5521257336\H,-6.5511259502,-0.8023536196,-2.7173043253\H,-0.1430650348,-2.2850734643,5.4806831227\C,7.4347153138,-3.5132574293,1.7387844832\C,-5.3172506798,1.242262077,-1.4421182718\H,-4.6507169119,1.794237964,-0.7582988469\C,-3.2007314741,-2.7187332118,1.1147152839\C,-6.6042446248,-3.5356481341,-2.5712600408\H,-7.1870377732,-2.9314377145,-3.2916764935\C,-3.9552242262,-3.1821218095,2.3783740824\H,-3.2423766478,-3.5392548699,3.1446574152\H,-4.5504550513,-2.3651311153,2.8212374324\H,-4.6471725383,-4.0122508837,2.1424381061\C,-7.6057844486,-4.3336879984,-1.710969239\H,-7.0804541203,-4.9712374711,-0.9759009219\H,-8.2812282308,-3.65942765,-1.1543680986\H,-8.2262191445,-4.9931015421,-2.3454096341\C,-5.6941112362,-4.4811901167,-3.3814779986\H,-6.2972954074,-5.1287043116,-4.0442579895\H,-4.9848029845,-3.9121692367,-4.0086197261\H,-5.1057529199,-5.1381004681,-2.7144145474\C,-4.9006500185,1.6076661031,-2.8816013795\H,-5.5601313108,1.1268573912,-3.6275978738\H,-4.9644803844,2.7009714269,-3.0339855992\H,-3.8623471062,1.2927254358,-3.0794601744\C,-6.7575140815,1.7041626465,-1.1372985099\H,-6.8536217599,2.7955982244,-1.2852204306\H,-7.489467722,1.208088033,-1.8009622286\H,-7.0360965959,1.4744195698,-0.09300138\C,6.2059246197,-0.8361403095,-1.5282734062\H,6.1652867863,-1.4751802044,-0.6271747126\C,2.2896081175,1.805076124,-3.5400482322\H,1.2590465893,1.9660029003,-3.1792719745\C,3.4358378009,2.200832759,1.4447518307\H,2.8779684474,3.1405942085,1.2959383272\C,6.1193259951,-1.7623169447,-2.7510079783\H,6.9073985649,-2.5346378387,-2.696699531\H,5.1435943203,-2.2776471895,-2.8024251547\H,6.2630762245,-1.2093326173,-3.6975600365\C,7.5615867965,-0.0974665787,-1.4868812024\H,7.6733485345,0.571519613,-2.3603205013\H,7.6525851243,0.5175765725,-0.573984476\H,8.3988568767,-0.8192227214,-1.4951781576\C,2.5384768125,1.2843680924,2.3038169933\H,1.6377295126,0.9726564287,1.7526512691\H,3.0831695541,0.3737468108,2.6105324833\H,2.2156830873,1.8041443027,3.2238721549\C,4.7279971152,2.5607066418,2.2003379714\H,5.3850223274,3.2093692141,1.5934516513\H,4.4806290286,3.1005715674,3.1322514118\H,5.3051945946,1.6628944216,2.4877357399\C,2.8161273795,3.1437904179,-4.1030482653\H,2.8163925287,3.9335864318,-3.3317814273\H,3.8521436051,3.0330141105,-4.4746231898\H,2.1846715079,3.4873885337,-4.9432276707\C,2.2051910456,0.7448253308,-4.6499178969\H,1.4910552122,1.0747497572,-5.4248485077\H,3.179260673

9,0.5814568535,-5.1475016569\H,1.8422983284,-0.2171322636,-4.252048869  
5\C,-2.3313274282,-3.8634778628,0.5574493171\H,-2.9326617559,-4.761339  
9205,0.3246238721\H,-1.8077220172,-3.5433706284,-0.3575239372\H,-1.574  
9616761,-4.1591751788,1.3067487068\H,-2.5144596777,-1.9084554438,1.409  
6080816\F,8.2314626689,-2.6722736117,1.015846114\F,7.9418618542,-4.759  
2126346,1.580965707\F,7.5949380155,-3.1718686911,3.0404569217\Version  
=ES64L-G09RevD.01\State=1-A\HF=-3513.6416873\RMSD=3.580e-09\RMSF=3.458  
e-06\Dipole=2.6542595,-2.8411442,3.2615004\Quadrupole=-13.4034677,18.5  
964458,-5.192978,-8.3743488,-12.5683273,8.8344941\PG=C01 [X(C65H69F3N1  
O4P1)]\@

Z-2c/1c (Type I; conf0)

1\1\GINC-LOGIN\FOpt\RTPSS\TPSS\def2SVP/W06\C65H69F3N1O4P1\JHIOE\05-Nov-  
2015\0\#p tpsstpss/def2svp/w06 densityfit empiricaldispersion=gd3 opt  
scrf=(smd,solvent=ch2cl2,read)\title\0,1P,-0.8819448808,0.03846417  
41,-1.445594675\O,-2.2470093459,0.8670831854,-0.9474498064\O,0.2872667  
02,0.7563178213,-0.4438950952\O,-0.7010516182,0.3626627731,-2.89796615  
38\O,-0.9127939231,-1.3924862766,-0.9057863363\C,-1.7221189689,2.00134  
67313,1.0830177564\C,-2.4796916928,1.0485675833,0.4003809419\C,-3.5381  
757379,0.3020462127,1.0069972588\C,-3.7803527322,0.5137470759,2.358428  
5371\H,-4.5970883644,-0.0258366479,2.8491534063\C,-2.9801492692,1.3993  
947914,3.136978322\C,-1.9230251754,2.149596883,2.5026662436\C,-1.09932  
06819,2.9815672407,3.3204056676\H,-0.2700367805,3.5270134195,2.8608189  
138\C,-1.3271601992,3.0937859797,4.6843653949\H,-0.6779499257,3.733635  
3988,5.292182851\C,-2.3908518811,2.3815180604,5.3010907115\H,-2.563766  
7406,2.4839640326,6.3779631834\C,-3.1955170031,1.5479688028,4.54051286  
26\H,-4.0081934115,0.979319545,5.0069205438\C,-0.6948228892,2.79535519  
87,0.349204878\C,0.3337225607,2.132037813,-0.3279131609\C,1.4981911665  
,2.8090913876,-0.8098620911\C,1.5150558135,4.1964945063,-0.7544971288\  
H,2.4026626086,4.7381635832,-1.098712969\C,0.415344707,4.9398162407,-0  
.2345252672\C,-0.7038586031,4.2355177769,0.341683967\C,-1.7946514191,4  
.9997426175,0.8560652161\H,-2.6629782603,4.4769700692,1.268478935\C,-1  
.7750442201,6.3862280412,0.8197401403\H,-2.6280148725,6.9517897121,1.2  
106888973\C,-0.6613873914,7.0789709162,0.2731207063\H,-0.6565082814,8.  
1742821216,0.2545532143\C,0.4091747043,6.3671153938,-0.2453704382\H,1.  
2687549296,6.8902121198,-0.6797226422\C,5.0259602315,-3.5906344156,3.3  
920837694\C,5.0964911236,-2.8350797246,2.2082295737\H,6.0672842368,-2.  
5574965758,1.788304982\C,3.9222776102,-2.4368355124,1.5688339429\H,3.9  
838002916,-1.8387169274,0.6564113531\C,2.6635624876,-2.775525204,2.116  
7969934\C,2.6046199298,-3.4981744873,3.3269696264\H,1.6394609501,-3.75  
6806539,3.770987561\C,3.7823407102,-3.9181520425,3.9545105645\H,3.7318  
445724,-4.4951273619,4.8820369442\C,1.4149292429,-2.3178457948,1.46410  
23716\C,0.3022441656,-1.7614916417,2.2964180209\H,-0.4777901707,-1.318  
7536233,1.661420535\H,0.6956664477,-1.0131643255,3.0032431942\H,-0.143  
6753533,-2.5753487553,2.8972776516\N,1.2455093565,-2.3507214374,0.1690  
527014\H,0.3280973869,-1.9056485479,-0.2345446037\C,2.0725280262,-2.93  
12553687,-0.8434310897\C,2.2978001727,-2.1737364335,-2.0061413632\H,1.  
9120784809,-1.1535170589,-2.0799315095\C,3.045560781,-2.7302794103,-3.  
0515802394\H,3.23103293,-2.1377780008,-3.952989436\C,3.5567120537,-4.0  
324564631,-2.9396869212\C,3.317623332,-4.7838672703,-1.7763575845\H,3.  
7039703383,-5.8049474966,-1.6917576027\C,2.5710444309,-4.2412007011,-0  
.7233924312\H,2.36223345,-4.8273994168,0.1761609572\C,2.7145642514,2.0  
134083353,-1.1864972836\C,2.9486648281,1.5990805009,-2.5219967212\C,3.  
6397950398,1.67791162,-0.1557416944\C,4.1027268267,0.8418623877,-2.801  
3625998\C,4.7664986369,0.9026671654,-0.4846201331\C,5.0158217986,0.471  
2153165,-1.8007142364\H,4.2984275182,0.5233856646,-3.8312603944\H,5.47

65900918,0.6366750533,0.3057726811\C,-4.3592375584,-0.6497789336,0.192  
1653779\C,-4.3060972655,-2.0497234576,0.4470915055\C,-5.211490826,-0.1  
504754142,-0.8310912741\C,-5.1189885788,-2.9108041029,-0.3112572689\C,  
-6.0001433852,-1.0566565342,-1.5647034242\C,-5.9744356565,-2.439095484  
,-1.321759829\H,-5.0770036014,-3.9873989902,-0.1090151351\H,-6.6634886  
652,-0.6722165078,-2.3492239176\H,4.1385893029,-4.4655280966,-3.759956  
0479\C,6.2998068015,-4.0884911982,4.031841035\C,-5.3351292686,1.344139  
4937,-1.1358200407\H,-4.6167450036,1.8848865887,-0.4976181614\C,-3.391  
5697552,-2.6571311534,1.5136381033\C,-6.8409225885,-3.3964748614,-2.13  
49163206\H,-7.4289990827,-2.7812161133,-2.8418198381\C,-4.2076238099,-  
3.1836675499,2.7127488828\H,-3.5364534814,-3.5711405698,3.5017046926\H  
,-4.8326994692,-2.3881822431,3.155895695\H,-4.8788282006,-4.0070253036  
,2.4051823886\C,-7.8370447897,-4.1623567052,-1.240353458\H,-7.30865753  
74,-4.8136055855,-0.5196418779\H,-8.4739889036,-3.4664533342,-0.665341  
6403\H,-8.4964523352,-4.8044387189,-1.8528901577\C,-5.9791649243,-4.36  
99779143,-2.9656424364\H,-6.6181552044,-5.0180906215,-3.5932610868\H,-  
5.2871568263,-3.8222163604,-3.6298237751\H,-5.3745174705,-5.0243430755  
,-2.3108856589\C,-4.9749856646,1.665693795,-2.6004801448\H,-5.68858088  
03,1.2005732444,-3.3052595526\H,-5.0018772798,2.7578613615,-2.77066747  
77\H,-3.960593002,1.3061246136,-2.8417590679\C,-6.7404630453,1.8676486  
026,-0.7715017725\H,-6.8036486195,2.9582867802,-0.9419364454\H,-7.5228  
283506,1.3845711785,-1.3854268796\H,-6.9740027934,1.6728747746,0.29083  
62231\C,6.2581445856,-0.3465811569,-2.1444205034\H,6.1606808429,-0.651  
5643811,-3.2035070074\C,1.9973898287,2.0134887097,-3.6446772323\H,1.00  
18237506,2.1532521779,-3.1895976548\C,3.4107433013,2.133457842,1.29019  
85412\H,2.7925334045,3.0468109684,1.2470962392\C,7.5363555397,0.509225  
4794,-2.0179678444\H,8.4285452427,-0.0719024527,-2.3158049554\H,7.4810  
879935,1.4068826357,-2.6594967242\H,7.6842988483,0.8465251089,-0.97524  
36284\C,6.3669052156,-1.6283072031,-1.2953637967\H,6.5152891221,-1.388  
377401,-0.2271367275\H,5.4576819571,-2.2468385494,-1.3869574413\H,7.22  
93881205,-2.2371080026,-1.6224835468\C,2.6100591493,1.0815218164,2.087  
1564719\H,1.6878536869,0.7945772558,1.5582024047\H,3.2136165963,0.1694  
111272,2.2404879907\H,2.3294561752,1.4759540067,3.0809751175\C,4.71013  
02477,2.5002959821,2.0299556507\H,5.3120326308,3.2282825278,1.45679453  
73\H,4.4705742659,2.9509238646,3.0100682889\H,5.3391172453,1.612264062  
5,2.2236495643\C,2.4457747958,3.3600780483,-4.2533558957\H,2.498885762  
,4.1514258483,-3.4854646646\H,3.4466276475,3.2684355629,-4.7154681949\  
H,1.7365784216,3.6903539152,-5.0347555955\C,1.8343770558,0.9447617232,  
-4.7391604102\H,1.0636897611,1.2652373356,-5.4629221273\H,2.7698513868  
,0.7809387298,-5.3050772714\H,1.501910021,-0.0131521119,-4.3074358081\  
C,-2.4808971334,-3.7589182544,0.9346439281\H,-3.0648217396,-4.62852814  
35,0.5814938979\H,-1.890492228,-3.3659080817,0.0909887502\H,-1.7833206  
221,-4.1257180032,1.7100731538\H,-2.7349661266,-1.8535426881,1.8856210  
826\F,6.157285335,-4.3104928538,5.361193327\F,7.3249829837,-3.21331010  
87,3.8766840007\F,6.7069397287,-5.2643565416,3.4799949752\\Version=ES6  
4L-G09RevD.01\State=1-A\HF=-3513.6375332\RMSD=4.169e-09\RMSF=3.516e-06  
\Dipole=2.609254,-2.5684961,3.403924\Quadrupole=-8.0836959,13.3074779,  
-5.2237819,-1.7425235,-18.0282278,2.5976443\PG=C01 [X(C65H69F3N1O4P1)]  
\\@

Z-2c/1c (Type I; conf1)

1\1\GINC-LOGIN\FOpt\RTPSSSTPSS\def2SVP/W06\C65H69F3N1O4P1\JHIOE\06-Nov-  
2015\0\#p tpsstps/def2svp/w06 densityfit empiricaldispersion=gd3 opt  
scrf=(smd,solvent=ch2cl2,read)\title\0,1\p,-1.3767794771,0.24655287  
43,-1.4249894344\O,-2.7941818784,0.6318210781,-0.6232544182\O,-0.23906  
65089,0.9712573912,-0.3924392285\O,-1.4630017243,0.9045205355,-2.76911



40266\O,-1.0595524323,-1.2386041817,-1.2407791184\C,-2.2195443529,1.40  
25377171,1.5589476585\C,-2.8709211585,0.4745361809,0.7452861266\C,-3.6  
797989741,-0.5886207967,1.2562558663\C,-3.7682417813,-0.7221474869,2.6  
362266874\H,-4.3961516731,-1.5123253476,3.0609637876\C,-3.0463655838,0  
.1287258446,3.5226900569\C,-2.2462467862,1.2030721285,2.9860690467\C,-  
1.4876987212,2.0015323931,3.8950649994\H,-0.8465371609,2.7948968202,3.  
4999107661\C,-1.5413134767,1.7739988308,5.2626198329\H,-0.9453356484,2  
.3954563684,5.9400475403\C,-2.3572240814,0.737987999,5.7919000967\H,-2  
.3953857772,0.5727720901,6.8741550867\C,-3.0893152927,-0.0695891414,4.  
9359005429\H,-3.7090933633,-0.8830365098,5.330288001\C,-1.4742547169,2  
.5361360601,0.9398521309\C,-0.4409344553,2.2693626643,0.0359508982\C,0  
.4938775254,3.2698846967,-0.3785262413\C,0.2520354056,4.5842204948,-0.  
0012383682\H,0.9642845199,5.3655739779,-0.2873626275\C,-0.8877017441,4  
.94443775,0.775416469\C,-1.7613978322,3.9084466271,1.2691208607\C,-2.8  
994050922,4.2913710712,2.0415615343\H,-3.5879993817,3.5175746679,2.394  
3887691\C,-3.152041252,5.6248625019,2.3280951477\H,-4.0376523613,5.896  
1802221,2.9131863176\C,-2.276194334,6.6423687728,1.862775714\H,-2.4843  
093544,7.6912920098,2.1004957616\C,-1.1688479439,6.3057432314,1.099770  
0789\H,-0.4926818654,7.0827097826,0.7251932994\C,5.7011960454,-2.90735  
22974,1.9319028094\C,5.4611642687,-1.9306761728,0.9483941271\H,6.28989  
39277,-1.3509696484,0.5321055722\C,4.1591512041,-1.6964609322,0.507200  
983\H,3.9775016365,-0.925833253,-0.2458893334\C,3.078957015,-2.4230663  
257,1.0602443476\C,3.3274340673,-3.3765629286,2.0692748456\H,2.5025269  
58,-3.9407757544,2.5129167878\C,4.6373201644,-3.6303757525,2.491907880  
6\H,4.8273222657,-4.3830211046,3.2617740372\C,1.6892655128,-2.12931876  
85,0.6387921939\C,0.6101274289,-2.0163106659,1.669974531\H,-0.32215952  
4,-1.6442308228,1.2225501994\H,0.9373688626,-1.3518320782,2.4862260918  
\H,0.4246332175,-3.0110758214,2.1148596347\N,1.3610430186,-1.922449500  
9,-0.6086257702\H,0.3308222032,-1.6101148397,-0.8182078426\C,2.1470405  
516,-2.0740532484,-1.7940417058\C,2.0708750487,-1.0492103252,-2.753303  
7522\H,1.4898715416,-0.1463745375,-2.5469083756\C,2.7717081652,-1.1861  
554293,-3.9582041879\H,2.7223607057,-0.3845078062,-4.701789485\C,3.535  
2576551,-2.337552009,-4.2047946238\C,3.5969021824,-3.3596614883,-3.242  
3050185\H,4.1812240846,-4.264906343,-3.437465373\C,2.9004332496,-3.237  
5327924,-2.0335475155\H,2.9249680471,-4.0382561116,-1.2888334204\C,1.7  
791128358,2.8570190217,-1.0356205698\C,1.9094178025,2.7946043501,-2.44  
59397072\C,2.8799410934,2.5220881006,-0.195168049\C,3.1402781647,2.382  
5725346,-2.9924528223\C,4.0812991537,2.0980626339,-0.7912110558\C,4.23  
20543301,2.0169028211,-2.1879753524\H,3.2548603734,2.3377230861,-4.081  
1704439\H,4.9272539581,1.832342722,-0.1481767323\C,-4.4206629741,-1.49  
47363443,0.3213314286\C,-4.0828131256,-2.872921908,0.2313157266\C,-5.4  
869816779,-0.9749005722,-0.4668487686\C,-4.8312841315,-3.701306944,-0.  
6274288372\C,-6.1993772783,-1.8442973976,-1.3104960511\C,-5.893038185,  
-3.2135796425,-1.4045490697\H,-4.5758454148,-4.7659343209,-0.695751582  
9\H,-7.025995468,-1.4402668232,-1.9067854466\H,4.0801157247,-2.4420796  
451,-5.1488092619\C,7.1239670385,-3.1885663353,2.3523035431\C,-5.91642  
33866,0.492456067,-0.3954238256\H,-5.2258396151,1.0201770853,0.2830299  
058\C,-2.9319326113,-3.4909992292,1.0285231831\C,-6.690079279,-4.14296  
99764,-2.3153895743\H,-6.244079656,-5.1507988674,-2.2181911967\C,-3.46  
05929439,-4.4255935596,2.1364655406\H,-2.6256209459,-4.822573803,2.743  
1737057\H,-4.1537216143,-3.8953907068,2.8134297404\H,-4.0040878225,-5.  
2865033879,1.7047017997\C,-6.5814196161,-3.7230854579,-3.795450536\H,-  
7.0243412297,-2.7238210048,-3.9618470155\H,-5.5269103536,-3.6849193737  
,-4.1219333175\H,-7.1163963443,-4.4407835275,-4.4442521401\C,-8.164314  
7356,-4.239120964,-1.8712262005\H,-8.7152120098,-4.9616425206,-2.50106  
92877\H,-8.2432335175,-4.5703547746,-0.8201372068\H,-8.6722002113,-3.2

607185301,-1.9587080665\C,-5.8253848617,1.1871080419,-1.7693150835\H,-  
6.5337506704,0.7453588364,-2.4942015977\H,-6.0723335497,2.2605346461,-  
1.672801624\H,-4.8061558047,1.1057152139,-2.1828837236\C,-7.3289569642  
,0.6256225872,0.2116323069\H,-7.6062862112,1.6907112366,0.3172786216\H  
, -8.0901753031,0.1405078442,-0.4268248472\H,-7.3768329188,0.1580816786  
,1.2116870171\C,5.5510650824,1.5755455491,-2.8176169418\H,5.372473572,  
1.4765680501,-3.9049841757\C,0.7545912062,3.218218742,-3.3533922545\H,  
-0.178613605,3.0437915785,-2.7906402049\C,2.759452476,2.5964873542,1.3  
313432036\H,1.9654869272,3.3283786568,1.5590313234\C,6.6456002198,2.64  
50912505,-2.61679882\H,7.584959661,2.3433654206,-3.1158149352\H,6.3331  
787977,3.6195968448,-3.0328528562\H,6.8638270389,2.7896221708,-1.54236  
6831\C,6.0175346485,0.2039237091,-2.2917576062\H,6.2568463686,0.249825  
1575,-1.2141613623\H,5.2412634127,-0.5661291288,-2.4402584454\H,6.9304  
780699,-0.1240228522,-2.8213201012\C,2.3085997729,1.2419128361,1.91826  
0845\H,1.4060971344,0.8670310841,1.4103370383\H,3.1044246479,0.4853450  
453,1.8016475133\H,2.0843149086,1.337607744,2.996457792\C,4.0427660891  
,3.0900978039,2.0236829997\H,4.3956713003,4.0436304768,1.5912430848\H,  
3.8511903727,3.2528077455,3.0997474132\H,4.8632869671,2.3536088528,1.9  
455893151\C,0.8533116126,4.7258333996,-3.6730875446\H,0.865089269,5.33  
30153222,-2.7511885836\H,1.7787276112,4.9482349941,-4.2368132264\H,-0.  
0076276482,5.0522157483,-4.2853580852\C,0.6501412154,2.3891531827,-4.6  
451615253\H,-0.256263625,2.6817496359,-5.2049025245\H,1.5157848278,2.5  
478069887,-5.3142995909\H,0.5631622242,1.3144852979,-4.4168694507\C,-1  
.9250649071,-4.2219610361,0.117003636\H,-2.3853307701,-5.0937487411,-0  
.3829500673\H,-1.537779064,-3.5374851018,-0.6553697252\H,-1.0718898156  
, -4.5973535428,0.711630754\H,-2.3889162107,-2.6671767134,1.5201725787\  
F,7.8494099881,-2.0472447346,2.4741740988\F,7.1970523202,-3.8397477942  
,3.5373869918\F,7.7719340916,-3.961047448,1.4378734929\\Version=ES64L-  
G09RevD.01\State=1-A\HF=-3513.6376244\RMSE=3.255e-09\RMSEF=3.330e-06\Di  
pole=3.454906,-2.6199941,2.4671866\Quadrupole=-11.3044578,11.9802623,-  
0.6758045,-2.8141134,-18.2693491,1.9611717\PG=C01 [X(C65H69F3N1O4P1)]\  
\@

Z-2c/1c (Type I; conf2)

1\1\GINC-LOGIN\FOpt\RTPSS\TPSS\def2SVP/W06\C65H69F3N1O4P1\JHIOE\05-Nov-  
2015\0\#p tpsstps/def2svp/w06 densityfit empiricaldispersion=gd3 opt  
scrf=(smd,solvent=ch2cl2,read)\title\0,1\p,-0.7844266808,-0.2448040  
875,-1.0946484129\O,-2.1779940041,0.6699591569,-0.9739301511\O,0.28631  
03972,0.7372314088,-0.2274711014\O,-0.4438533136,-0.3307386368,-2.5543  
522976\O,-0.9094465607,-1.4859171612,-0.2079211538\C,-1.8548733848,2.2  
46028628,0.7914795394\C,-2.5476340926,1.1533269516,0.2674295694\C,-3.6  
659579925,0.5447390453,0.9171411357\C,-4.0471557117,1.0547063204,2.151  
6840068\H,-4.9164589883,0.6301368425,2.6643042222\C,-3.3231720315,2.10  
39020892,2.7884370403\C,-2.1983671933,2.7055006812,2.1139822828\C,-1.4  
516726572,3.7074223857,2.8051706389\H,-0.5724165161,4.144968822,2.3235  
0512\C,-1.8157835473,4.1187934445,4.0790668968\H,-1.2230963251,4.88414  
33765,4.5921146994\C,-2.9463538704,3.5519778157,4.7265006487\H,-3.2274  
116048,3.8905679623,5.7297278692\C,-3.680119716,2.5615044584,4.0929312  
188\H,-4.5431391174,2.1027642084,4.5888990669\C,-0.7674706815,2.879517  
6308,-0.0081742213\C,0.3069165312,2.1003684793,-0.4515406293\C,1.48276  
87891,2.6699180403,-1.0357150394\C,1.4918027614,4.0362766874,-1.281744  
7599\H,2.3907547355,4.5023152733,-1.6989191085\C,0.3670800328,4.860141  
8206,-0.9883177225\C,-0.782642459,4.2825323595,-0.3367200973\C,-1.9049  
704881,5.1253291107,-0.0728278383\H,-2.7980497137,4.6946688719,0.38947  
56827\C,-1.8840899895,6.4704827905,-0.4107858076\H,-2.7607394084,7.095  
0606842,-0.2065912204\C,-0.7390628937,7.0435580848,-1.0268657305\H,-0.

733987888,8.1082527202,-1.2847147732\C,0.3610465385,6.2503493311,-1.31  
18598274\H,1.2449103536,6.6771363935,-1.799479752\C,5.5711849477,-2.68  
96899124,3.4857724182\C,5.3913303623,-2.1729300145,2.1895033835\H,6.25  
31083184,-1.847999096,1.5991126488\C,4.1059777376,-2.0687931246,1.6589  
715325\H,3.9671027515,-1.6484409121,0.6600809144\C,2.9852541099,-2.461  
3172177,2.4264198926\C,3.1726204945,-2.9390678134,3.7394066402\H,2.312  
9443641,-3.2284384651,4.3503901978\C,4.4648102095,-3.0713450925,4.2605  
011334\H,4.6096239005,-3.4618331997,5.271364054\C,1.6240330279,-2.2616  
324905,1.8815858859\C,0.5697259447,-1.6451268949,2.7467341349\H,-0.274  
6084799,-1.2865272246,2.1391791374\H,0.9925679999,-0.8302046608,3.3539  
34668\H,0.2006542166,-2.4199709366,3.4460490655\N,1.2995762301,-2.5647  
32887,0.6493566523\H,0.3476041997,-2.1604511898,0.2954118672\C,2.02318  
02283,-3.3137047126,-0.3276226481\C,1.8955917536,-2.9210240517,-1.6737  
998594\H,1.2790891761,-2.0576988988,-1.9430283369\C,2.5650405116,-3.64  
77637105,-2.6667115037\H,2.4781739536,-3.3320783743,-3.7112699273\C,3.  
3408736579,-4.766161551,-2.3261790819\C,3.4370489638,-5.168423359,-0.9  
831841485\H,4.0219686564,-6.0541615989,-0.7142653806\C,2.777808484,-4.  
4508670381,0.0212063183\H,2.8333587623,-4.7798616623,1.0622230419\C,2.  
7099107893,1.8266065065,-1.2280178033\C,2.9833285809,1.1886994752,-2.4  
678588274\C,3.6049090667,1.6826388941,-0.133660831\C,4.1425154532,0.40  
00173755,-2.5818429445\C,4.7496864205,0.8792025402,-0.2977548069\C,5.0  
340889668,0.2239350577,-1.5069964826\H,4.356000525,-0.0934426756,-3.53  
60717511\H,5.4410994641,0.7524753076,0.5431450886\C,-4.4092332042,-0.5  
79948735,0.2634179971\C,-4.3748967189,-1.8880457004,0.8247575282\C,-5.  
1703424756,-0.3343793062,-0.9120267336\C,-5.1314312448,-2.9070258677,0  
.2186166876\C,-5.9020686975,-1.3921603076,-1.4840467614\C,-5.903879269  
7,-2.6839710873,-0.9346217733\H,-5.1074823407,-3.9113596542,0.65673975  
5\H,-6.4940231785,-1.20366253,-2.3882390621\H,3.8637725624,-5.33027914  
46,-3.1054176787\C,6.9737560643,-2.8549355847,4.019393068\C,-5.2407687  
153,1.0472083098,-1.5652409892\H,-4.5901684632,1.7289266101,-0.9927316  
486\C,-3.537068585,-2.2276907745,2.0608239475\C,-6.7005941121,-3.81240  
93778,-1.5841189242\H,-7.2302340543,-3.3771708092,-2.4524233161\C,-4.4  
298977161,-2.4134181239,3.3059922005\H,-3.8135494245,-2.6159549093,4.2  
015459525\H,-5.0385602854,-1.5143999869,3.5069777642\H,-5.1224233739,-  
3.2651495916,3.1713054162\C,-7.7636964347,-4.3868061415,-0.6256787724\  
H,-7.2934087979,-4.8368443123,0.2680107151\H,-8.459799942,-3.600121493  
7,-0.2832647839\H,-8.3559874311,-5.1744551612,-1.1265531785\C,-5.77043  
68206,-4.9243747142,-2.1119346433\H,-6.3531561913,-5.7041036818,-2.636  
0894721\H,-5.0251291595,-4.5176752802,-2.8184978288\H,-5.2223384007,-5  
.4117745726,-1.2846113591\C,-4.7095961629,1.0189524059,-3.0131223529\H  
, -5.3473713666,0.3947403807,-3.6658803099\H,-4.6956018684,2.0402674939  
, -3.4365680931\H,-3.6816199495,0.6202109264,-3.0426062512\C,-6.6682075  
114,1.6293248018,-1.4980532692\H,-6.6896417008,2.6498718033,-1.9228673  
856\H,-7.3848050232,1.0114931112,-2.0700923965\H,-7.0261968114,1.68612  
02143,-0.4541671508\C,6.2764799999,-0.6532907641,-1.6417313747\H,6.804  
6970793,-0.6127112531,-0.6701811841\C,2.0721783924,1.412088735,-3.6749  
926836\H,1.0605079889,1.6137287738,-3.2822372451\C,3.3252998168,2.3542  
390849,1.2140482846\H,2.6124254024,3.1760846281,1.0290817043\C,5.90311  
68584,-2.1253955284,-1.9101350558\H,6.8062693318,-2.762995671,-1.91194  
58387\H,5.2129879488,-2.5123619301,-1.1410830898\H,5.4090013112,-2.238  
6808175,-2.8918141028\C,7.2411160109,-0.1217224319,-2.7211709\H,6.7696  
161687,-0.1417522365,-3.7210663866\H,7.5454031267,0.9189867647,-2.5095  
196864\H,8.1542175481,-0.7431885511,-2.7679999498\C,2.6388798141,1.366  
1608591,2.1811979659\H,1.7451757619,0.9192567893,1.7167144689\H,3.3290  
122524,0.5483097786,2.4558159513\H,2.3280574683,1.8779286108,3.1107254  
208\C,4.5782321477,2.9768080654,1.8574654478\H,5.086357919,3.671993224

8,1.1651806369\H,4.294580919,3.54366546,2.7628110518\H,5.3101308152,2.2089266888,2.1681200997\C,2.5414659689,2.6488945495,-4.4729286517\H,2.5763551081,3.5514527703,-3.8394902133\H,3.5550480721,2.4858538234,-4.8849807833\H,1.8570355198,2.851080365,-5.3175562291\C,1.9550893591,0.1886835105,-4.6002789649\H,1.187711447,0.3789323941,-5.3719029096\H,2.9033818268,-0.0277448379,-5.1259400764\H,1.6463450325,-0.7053465605,-4.0356738702\C,-2.647040377,-3.4666044581,1.8352391907\H,-3.2485989919,-4.3837782325,1.6982216935\H,-2.00924591,-3.3264931028,0.9475992192\H,-1.9946969836,-3.6320302495,2.7119852792\H,-2.8653289089,-1.3735820113,2.2513385733\F,7.0042973229,-3.0099729123,5.364606624\F,7.7563982941,-1.786683544,3.7189431095\F,7.5876160855,-3.9448872243,3.4828616511\\Version=ES64L-G09RevD.01\State=1-A\HF=-3513.6372054\RMSD=3.610e-09\RMSF=2.746e-06\Dipole=2.4483855,-2.3032062,3.350074\Quadrupole=-13.6637934,14.9845456,-1.3207522,-8.7067118,-12.3123171,-2.7536733\PG=C01 [X(C65H69F3N1O4P1)]\@

## Solution Phase pcf3-pome-ketimine/TRIP

### *E*-configuration

#### E-3a/1c (Type I; conf0)

1\1\GINC-LOGIN\FOpt\RTPSSSTPSS\def2SVP/W06\C66H71F3N1O5P1\JHIOE\01-Mar-2016\0\#p tpsstps/def2svp/w06 densityfit empiricaldispersion=gd3 opt scrf=(smd,solvent=ch2cl2,read)\title\0,1\P,0.2111972626,-0.45452478 22,-1.2494610938\O,-1.2361889646,0.2140031522,-1.7582050684\O,0.709302 8814,0.7554829754,-0.1699456055\O,1.0865713835,-0.5327985615,-2.465310 5149\O,-0.0296035465,-1.6379101854,-0.3158133065\C,-1.7731996895,2.066 9086017,-0.3343675545\C,-2.106716474,0.8230346798,-0.8786906324\C,-3.3 690120177,0.1857657072,-0.6568443568\C,-4.2709379299,0.8122419296,0.19 31088978\H,-5.2516906286,0.3573013056,0.3670394151\C,-3.9480129519,2.0 233094854,0.8695856033\C,-2.6759018538,2.6579483596,0.6235238792\C,-2. 3455967019,3.8226891697,1.3811955509\H,-1.3680528979,4.2929921511,1.23 91001634\C,-3.2348492254,4.3501205962,2.3061973965\H,-2.9534204639,5.2 370405481,2.8844852275\C,-4.5029857759,3.7456446517,2.5172245754\H,-5. 1964893062,4.1730663105,3.2494189752\C,-4.8478661867,2.6038588858,1.81 28081763\H,-5.8095297916,2.1095781195,1.9879761109\C,-0.5046313341,2.7 414643937,-0.7336401956\C,0.7134879108,2.0700459559,-0.5950608318\C,1. 9810396311,2.7009729046,-0.7971013523\C,1.9871351923,4.0177486142,-1.2 366291624\H,2.9425760974,4.5312445242,-1.3867665599\C,0.7792539556,4.7 182068509,-1.5227300902\C,-0.4899193613,4.0773528441,-1.276729114\C,-1 .6813067854,4.7871582401,-1.61688763\H,-2.6510994155,4.3026183593,-1.4 719465457\C,-1.6249855672,6.0688763025,-2.1444931782\H,-2.5530030829,6 .5892400547,-2.4058191557\C,-0.3748943044,6.709658804,-2.3567286858\H, -0.3446122765,7.7239350979,-2.7694496233\C,0.8019063823,6.0425670116,- 2.0549367974\H,1.773450323,6.5189290196,-2.22966109\C,-2.2945319265,-0 .5974072393,4.1288173039\C,-1.7198021518,-1.670462874,4.8275694059\H,- 2.2313524848,-2.1022803834,5.6917268675\C,-0.4854963016,-2.1831598861, 4.4148025906\H,-0.0445025536,-3.0206826338,4.9626495519\C,0.1658430628 , -1.6510455103,3.2795159845\C,-0.4203436854,-0.5649226511,2.5894241645 \H,0.0839441753,-0.1106661163,1.733525536\C,-1.6394992392,-0.038944887 9,3.0172070969\H,-2.0791177061,0.8083919647,2.4843185315\C,1.465651929 8,-2.2157953084,2.854136229\C,2.4483123274,-2.6483313575,3.898842932\H ,3.48342026,-2.5324174699,3.5386702036\H,2.296766499,-3.711974939,4.16 03352414\H,2.3041330619,-2.0535810129,4.8134139994\N,1.7249485108,-2.2 746893713,1.5674149272\H,0.967999677,-1.9421759511,0.8686079378\C,2.88

75550505,-2.756476255,0.9018379316\C,3.291096318,-2.0661768599,-0.2637  
112464\H,2.7567922795,-1.1734943426,-0.5968276487\C,4.4021518918,-2.49  
4143191,-0.979057646\H,4.7304031884,-1.9523319739,-1.8693351229\C,5.14  
21838746,-3.6173551626,-0.548396356\C,4.7170720984,-4.3353314698,0.590  
7552936\H,5.2470705166,-5.2305089812,0.9245457645\C,3.5924435235,-3.90  
70668019,1.3056250618\H,3.2517593814,-4.4988461892,2.1577060047\C,3.24  
53350858,1.9555361223,-0.4945085804\C,4.0956397725,1.5171741273,-1.544  
3232561\C,3.5887025541,1.6867087074,0.8605899458\C,5.274582489,0.82340  
24772,-1.2125927518\C,4.7705360234,0.9758199992,1.1361062827\C,5.62400  
57292,0.5247525926,0.1140480026\H,5.9298902171,0.4728621488,-2.0189287  
143\H,5.0275255619,0.762176387,2.1774388242\C,-3.7054890298,-1.0890288  
383,-1.3680001894\C,-3.8854180574,-2.2974483659,-0.6418340546\C,-3.864  
4200509,-1.0833567506,-2.7837842134\C,-4.239631486,-3.466611172,-1.344  
4029138\C,-4.2100570015,-2.2788234191,-3.4360082294\C,-4.4097425986,-3  
.4828403143,-2.73697682\H,-4.3802780003,-4.4006928635,-0.7863616809\H,  
-4.3365735561,-2.2663860713,-4.5250296063\C,-3.6253415551,-0.021332702  
1,4.5452463559\C,-3.7191860494,0.1905648389,-3.620173938\H,-3.40955148  
13,1.0096001736,-2.9502996147\C,-3.6739795056,-2.3855820572,0.87082845  
88\C,-4.794734232,-4.766748692,-3.466615941\H,-4.9088153583,-5.5542606  
425,-2.6979475269\C,-4.9811896719,-2.7323928131,1.6113094033\H,-4.8136  
728103,-2.761454291,2.702674668\H,-5.7696831808,-1.9861163538,1.407622  
6556\H,-5.364337886,-3.7223527868,1.3020002576\C,-3.686232672,-5.22003  
55427,-4.4389305823\H,-3.533106036,-4.4782720773,-5.2444981654\H,-2.72  
36795483,-5.3516741669,-3.9132754682\H,-3.9538604164,-6.1821915617,-4.  
9132088588\C,-6.1471658959,-4.6246665438,-4.1952843368\H,-6.4351202947  
, -5.5795288876,-4.67231962\H,-6.9507962701,-4.3362756251,-3.4942325959  
\H,-6.0962038476,-3.8553868008,-4.9876943348\C,-2.6286158798,0.0496411  
138,-4.70128028\H,-2.8920227437,-0.7259012945,-5.4438760191\H,-2.50443  
00779,1.0040908455,-5.2454783605\H,-1.6594143689,-0.2147776148,-4.2461  
227173\C,-5.0732458924,0.6037539769,-4.2348553439\H,-4.9721826989,1.55  
44591658,-4.7901793684\H,-5.4468061951,-0.1613300074,-4.9403881793\H,-  
5.83911667,0.7451325084,-3.4509304202\C,6.8936511357,-0.2754118784,0.4  
009033519\H,7.0384496928,-0.9502210059,-0.4647302658\C,3.7667783049,1.  
7737422954,-3.0161359205\H,2.7178782817,2.1125181616,-3.0659287681\C,2  
.7212520234,2.2114456699,2.0081245946\H,1.6749340708,2.2195997837,1.65  
73210976\C,8.1243931781,0.654772698,0.4736446098\H,9.0512493516,0.0704  
318692,0.6227150076\H,8.2353867843,1.2423540215,-0.4551291644\H,8.0286  
958833,1.3658436877,1.3152174743\C,6.791977222,-1.1576133206,1.6575119  
258\H,6.7802529438,-0.5539908009,2.5836156521\H,5.8778769429,-1.776780  
4293,1.64097423\H,7.662045945,-1.8361004253,1.7175989414\C,2.762990226  
8,1.3373173853,3.2730668232\H,2.566577018,0.278281192,3.036847025\H,3.  
7395980475,1.3969552923,3.7867195326\H,1.9933869959,1.6741132438,3.990  
0513801\C,3.1051816236,3.6704736865,2.3402527817\H,3.0078869842,4.3216  
474664,1.45391812\H,2.4524901861,4.0755716128,3.1354992373\H,4.1519116  
623,3.7264327476,2.6919986918\C,4.6577871109,2.8987240138,-3.584164104  
2\H,4.553848019,3.8301933011,-3.0000937252\H,5.7241272378,2.6052616922  
, -3.5629832398\H,4.387187947,3.1198159888,-4.6332059159\C,3.8661489298  
,0.4985605738,-3.8763716923\H,3.5589071197,0.7220704939,-4.9148663582\  
H,4.8983319189,0.1052152599,-3.9170732022\H,3.1936747035,-0.2798468183  
, -3.4817358336\C,-2.5485790994,-3.3798299633,1.2245755914\H,-2.8212605  
854,-4.4165446537,0.9528225844\H,-1.6194841544,-3.109952894,0.69564530  
76\H,-2.3503248483,-3.359255766,2.3118500679\H,-3.3465610577,-1.394088  
9677,1.2223975253\F,-3.5377927568,1.3085862287,4.8119146596\F,-4.55938  
74703,-0.1518739858,3.5596872528\F,-4.1353706135,-0.6170843211,5.64869  
63567\O,6.2377000123,-3.9203946664,-1.2846694533\C,7.0578184591,-5.027  
6050871,-0.8867649196\H,6.4922901196,-5.9770752117,-0.919967321\H,7.87

99301957,-5.0654657942,-1.6163884792\H,7.4707778293,-4.8734665277,0.12  
74760021\\Version=ES64L-G09RevD.01\State=1-A\HF=-3628.1118665\IRMSD=2.9  
71e-09\RMSF=7.932e-06\Dipole=3.6338164,-3.0062671,4.8245074\Quadrupole  
=3.1994282,11.5650936,-14.7645219,-31.0119745,15.1103672,-22.8722506\IP  
G=C01 [X(C66H71F3N1O5P1)]\@

E-3a/1c (Type I; conf1)

1\1\GINC-WORKER1\FOpt\RTPSSTPSS\def2SVP/W06\C66H71F3N1O5P1\JHIOE\07-Ma  
r-2016\0\#p tpsstps\def2svp/w06 densityfit empiricdispersion=gd3 o  
pt scrf=(smd,solvent=ch2cl2,read)\title\0,1\P,0.1785616109,-0.429214  
9815,-1.3091795755\O,-1.2726659477,0.2590907425,-1.7782959033\O,0.7076  
48317,0.7565598263,-0.2156975901\O,1.0265507007,-0.4924877028,-2.54509  
89191\O,-0.0524346111,-1.6251761127,-0.3892952378\C,-1.7657581063,2.09  
77607203,-0.3233820215\C,-2.119816367,0.8615043445,-0.872126738\C,-3.3  
776464182,0.2252728792,-0.6226395291\C,-4.2563761128,0.8496757741,0.25  
279773\H,-5.2334566052,0.3959456259,0.4491579742\C,-3.9129622592,2.055  
1238389,0.9291542442\C,-2.6435959293,2.6858104024,0.6596184006\C,-2.29  
10059128,3.8417643487,1.4208715218\H,-1.31516333,4.3096749419,1.261793  
5769\C,-3.1566012014,4.3646310389,2.3705745385\H,-2.8575847518,5.24490  
46828,2.9501904711\C,-4.4225131796,3.7643353509,2.6049735025\H,-5.0970  
729227,4.1879952194,3.3567825298\C,-4.7885700885,2.6308895302,1.897850  
6456\H,-5.7480761831,2.1388463431,2.0903900765\C,-0.4949650583,2.76343  
40435,-0.7324309495\C,0.7185844452,2.0793392557,-0.612258964\C,1.99066  
37515,2.7061009811,-0.7972223903\C,2.0068773236,4.0310105254,-1.211542  
6372\H,2.9654703212,4.542228039,-1.3481898041\C,0.8039309711,4.7446702  
467,-1.4852150499\C,-0.4696828705,4.1095691574,-1.2487622313\C,-1.6561  
434793,4.8352048424,-1.5718819994\H,-2.6289393775,4.3542337217,-1.4348  
433277\C,-1.5909244612,6.1276324546,-2.0716038208\H,-2.5153758151,6.66  
06012947,-2.3198214073\C,-0.3361701352,6.7630183922,-2.2724664894\H,-0  
.298757419,7.7860372035,-2.662438143\C,0.8359114949,6.0802659635,-1.98  
80134545\H,1.8109141882,6.552608777,-2.1540132012\C,-2.1897089896,-0.5  
827189867,4.1538587568\C,-1.5969608352,-1.6574544135,4.8347203327\H,-2  
.081579058,-2.0855974906,5.7160452192\C,-0.3798711641,-2.1771751495,4.  
3810465564\H,0.0745718177,-3.0169309925,4.9142851972\C,0.2350446831,-1  
.6501559287,3.2232610094\C,-0.3682019228,-0.5611402538,2.5526302972\H,  
0.1089755466,-0.1100357236,1.6797456132\C,-1.5691614327,-0.0284664678,  
3.0206756019\H,-2.0227528851,0.8200075306,2.5016309882\C,1.5135749502,  
-2.2255064861,2.7506171183\C,2.5249544706,-2.6846767559,3.7560000611\H  
,3.5481738647,-2.5855533211,3.3587187728\H,2.3622817019,-3.7470421352,  
4.0155756749\H,2.4257003788,-2.0949802995,4.6797112281\N,1.7317241355,  
-2.2741801318,1.4561362871\H,0.9598228682,-1.9295098672,0.7794503566\C  
,2.8658521506,-2.7750743511,0.7549010012\C,3.2761611907,-2.0696784497,  
-0.3988473227\H,2.7732368275,-1.1463753162,-0.6958674837\C,4.355622474  
1,-2.524373026,-1.146177178\H,4.6931573255,-1.9720676872,-2.0264798051  
\C,5.0517084021,-3.692412308,-0.763053709\C,4.6196057498,-4.421097959,  
0.3667443545\H,5.116866195,-5.3466903302,0.6661679006\C,3.5297702525,-  
3.9629878945,1.1158204823\H,3.1814510542,-4.5585379045,1.9623054493\C,  
3.2473732283,1.9478488734,-0.4923350074\C,4.0981139887,1.5052684686,-1  
.5389266378\C,3.5796339764,1.6680202925,0.8640385552\C,5.2688784962,0.  
7977132706,-1.2048896238\C,4.7509644596,0.9417109624,1.1416197417\C,5.  
6062844423,0.4880911939,0.1216393277\H,5.9266653242,0.4463672628,-2.00  
86773293\H,5.0010993993,0.7186482637,2.1828564591\C,-3.733469511,-1.05  
05208849,-1.3231716684\C,-3.8940420456,-2.2584623012,-0.5871313862\C,-  
3.93222251,-1.0498699399,-2.7317716648\C,-4.2640919607,-3.4296305303,-  
1.27309352\C,-4.2969829109,-2.2504669515,-3.3692923221\C,-4.4730859043  
,-3.4509484827,-2.6625904444\H,-4.3856975125,-4.3573185457,-0.70131133

52\H,-4.4592938833,-2.2499663809,-4.4543826862\C,-3.5042495089,0.00004  
25642,4.6106924405\C,-3.8103701928,0.2209081547,-3.5761073798\H,-3.486  
9080254,1.0423165283,-2.9155942024\C,-3.6462190752,-2.3418082365,0.920  
4850727\C,-4.8839913108,-4.7335220533,-3.38073085\H,-4.9606704296,-4.4  
924048816,-4.4576225844\C,-4.9380315147,-2.6794425099,1.6918958747\H,-  
4.7458722046,-2.7087411784,2.7791854398\H,-5.7266228572,-1.9288248052,  
1.5054121668\H,-5.3339141699,-3.6673711563,1.3922751587\C,-6.269315132  
6,-5.2210466693,-2.9082536216\H,-6.2529129368,-5.4828703319,-1.8341164  
141\H,-7.0382161205,-4.4415490015,-3.0550891183\H,-6.5803903281,-6.121  
1695209,-3.4697254384\C,-3.8227018457,-5.841563213,-3.2231579638\H,-4.  
1063896528,-6.7382778873,-3.8042589647\H,-2.8340045346,-5.5004756398,-  
3.5787172861\H,-3.7163716364,-6.1464480747,-2.165832186\C,-2.745177995  
7,0.0793271273,-4.682174988\H,-3.0229859161,-0.7005491369,-5.414876632  
5\H,-2.6380903174,1.0318969585,-5.2332839309\H,-1.7642766219,-0.178996  
6319,-4.2492001723\C,-5.179310518,0.6293035897,-4.1601106046\H,-5.0933  
531498,1.5790940519,-4.7195397073\H,-5.5670519547,-0.1379203514,-4.855  
5087271\H,-5.9273882167,0.7704502654,-3.3591336393\C,6.8679253637,-0.3  
180012938,0.4223300045\H,7.0899131969,-0.9073090871,-0.4880695702\C,3.  
776928263,1.7743443383,-3.0101759442\H,2.7288136228,2.1154794056,-3.06  
04073313\C,2.7120097275,2.1963276524,2.00965487\H,1.6653152394,2.20171  
79937,1.6592518367\C,8.0689586292,0.618749534,0.6776276406\H,8.9942843  
267,0.0362887312,0.8425778496\H,8.237658985,1.2957848912,-0.178834785\  
H,7.89292688563,1.2422527778,1.5739136857\C,6.6884820767,-1.3129719151,  
1.5837726174\H,6.5831281305,-0.7948576244,2.554451055\H,5.7964866999,-  
1.9458672126,1.4349513825\H,7.5695834241,-1.9758264575,1.6579978845\C,  
2.7586031727,1.3269673108,3.2776472788\H,2.5758030714,0.2650141036,3.0  
445074245\H,3.7333914104,1.3994675286,3.7931623763\H,1.9834526717,1.65  
69484206,3.9917458937\C,3.0946029623,3.65646822,2.3390743964\H,3.00015  
31057,4.3070942741,1.4521875485\H,2.440002152,4.0623581803,3.132312745  
9\H,4.1405271994,3.7127626612,2.6932957604\C,4.6722872717,2.9028642022  
,-3.5641659959\H,4.5654947908,3.8298157679,-2.9735016338\H,5.738093145  
5,2.6077940935,-3.539298503\H,4.4075422662,3.1322849588,-4.6128391677\  
C,3.8779831526,0.5071706678,-3.8816045269\H,3.5709871811,0.7393373083,  
-4.9182007373\H,4.9107228135,0.115791727,-3.9252308613\H,3.2065979519,  
-0.2766988937,-3.4959201528\C,-2.5193479522,-3.3420830914,1.2511584698  
\H,-2.8056502675,-4.378248369,0.9915015821\H,-1.6021287175,-3.08172880  
4,0.6974148922\H,-2.2939850271,-3.3177650827,2.332946759\H,-3.30511641  
43,-1.3512352559,1.2612232178\F,-3.3993370163,1.3272050643,4.885149419  
3\F,-4.46458092,-0.1151821501,3.6488111033\F,-3.9894013768,-0.60069359  
48,5.7225177001\O,6.1137154338,-4.0268362285,-1.5341526777\C,6.8936832  
146,-5.17693654,-1.180235963\H,6.2876827655,-6.1009965002,-1.218111457  
\H,7.6958521682,-5.2352950402,-1.9304582265\H,7.3373938561,-5.06207894  
51,-0.1738507192\\Version=ES64L-G09RevD.01\State=1-A\HF=-3628.1117188\  
RMSD=5.408e-09\RMSF=6.033e-06\Dipole=3.660478,-3.0869239,4.7528557\Qua  
drupole=3.0772844,13.6356389,-16.7129233,-30.9002314,13.5659982,-20.87  
51291\PG=C01 [X(C66H71F3N1O5P1)]\@

E-3a/1c (Type I; conf2)

1\1\GINC-WORKER0\FOpt\RTPSSTPSS\def2SVP/W06\C66H71F3N1O5P1\JHIOE\07-Ma  
r-2016\0\#p tpsstps/def2svp/w06 densityfit empiricdispersion=gd3 o  
pt scrf=(smd,solvent=ch2cl2,read)\title\0,1\P,0.1520470679,-0.480198  
9261,-1.3172962472\O,-1.2796338738,0.2527752103,-1.7782226161\O,0.7203  
921723,0.6806987034,-0.2150276917\O,0.9949670186,-0.56301412,-2.555495  
8789\O,-0.1133764724,-1.6711254621,-0.3994572433\C,-1.7435863315,2.064  
5587934,-0.2835954472\C,-2.1204434532,0.84972821,-0.863056412\C,-3.393  
8402996,0.2358282656,-0.638895035\C,-4.2757631644,0.8708518198,0.22552

87728\H,-5.2656960799,0.4364734408,0.4000570396\C,-3.9163422327,2.0590  
662359,0.9246992189\C,-2.6212136296,2.6537305732,0.6989226762\C,-2.246  
497415,3.7776245695,1.4958441133\H,-1.2486880809,4.2088580149,1.373221  
9975\C,-3.1183604527,4.312467825,2.4328090575\H,-2.8032419132,5.167188  
0241,3.0413674528\C,-4.41277506,3.7566976464,2.6165359135\H,-5.0931327  
982,4.1910138127,3.3570132235\C,-4.7982006711,2.6489461777,1.879455658  
8\H,-5.7792543765,2.187972953,2.0371398979\C,-0.4616466037,2.716204278  
7,-0.6776497298\C,0.7434067074,2.0110455916,-0.5855935836\C,2.02052995  
79,2.623913307,-0.7753120466\C,2.0495211357,3.9587509893,-1.1582330083  
\H,3.0142874003,4.4593493632,-1.2906964785\C,0.8558387532,4.6985528309  
,-1.3952051182\C,-0.4236384028,4.074222295,-1.1636069477\C,-1.60200056  
86,4.827132024,-1.4539632077\H,-2.5813491901,4.3583651604,-1.323054577  
2\C,-1.5225434779,6.1326687752,-1.9158318292\H,-2.4418235297,6.6853868  
35,-2.1387083309\C,-0.2609474205,6.7565020063,-2.1100239746\H,-0.21237  
31334,7.7899698432,-2.4700250427\C,0.9031033502,6.0476235401,-1.860141  
8409\H,1.8838668244,6.5090496171,-2.0226278205\C,-2.3063999924,-0.5862  
076527,4.1553735783\C,-1.7176474799,-1.6481702724,4.8588809487\H,-2.20  
72074089,-2.0604695234,5.7449559358\C,-0.5001327464,-2.1787304774,4.42  
01906493\H,-0.0506638875,-3.0102488977,4.9700353898\C,0.1187779622,-1.  
6755628376,3.2536904784\C,-0.4782800948,-0.5955153334,2.5629809988\H,0  
.0015482984,-0.1624343326,1.6820638664\C,-1.679243054,-0.0516043902,3.  
0162977869\H,-2.1291953579,0.7886582043,2.4814462674\C,1.3893338701,-2  
.2681516256,2.7843334314\C,2.3841677271,-2.7653168628,3.7877986692\H,3  
.4089470116,-2.7213710033,3.3855795686\H,2.1694665086,-3.8158053797,4.  
0582076755\H,2.3171894601,-2.1619545267,4.7059073863\N,1.6146664275,-2  
.3037603737,1.4910498972\H,0.8544651883,-1.9480186233,0.8058522249\C,2  
.7374522546,-2.8320040309,0.7921840081\C,3.2032541666,-2.1130886118,-0  
.3324483115\H,2.7639888123,-1.1481064101,-0.5971650826\C,4.257348552,-  
2.6123069703,-1.0871208373\H,4.634534414,-2.05592941,-1.9485392726\C,4  
.873667019,-3.8358495457,-0.7381388993\C,4.3925219317,-4.567330649,0.3  
68895482\H,4.8287790652,-5.530616697,0.6427259472\C,3.3242649116,-4.06  
69929484,1.122492905\H,2.9295309491,-4.6671684132,1.9458861501\C,3.292  
653573,1.8783773268,-0.4974877892\C,4.1437936431,1.4815083831,-1.56261  
32899\C,3.6803549164,1.6390215895,0.8508313698\C,5.3988233896,0.918557  
8277,-1.2584809496\C,4.9424587022,1.0702902773,1.1003664866\C,5.830538  
607,0.7282605709,0.0648722077\H,6.0584297467,0.6283992892,-2.084020071  
9\H,5.2618707292,0.906091603,2.135564839\C,-3.7520745853,-1.0340968319  
,-1.3484870294\C,-3.9247585795,-2.2419639804,-0.6193609853\C,-3.927466  
4871,-1.0298042095,-2.7620921555\C,-4.2780706243,-3.413421137,-1.31798  
89034\C,-4.2781927002,-2.2260900248,-3.4099513249\C,-4.4590819213,-3.4  
321769259,-2.7091971734\H,-4.4086977953,-4.3469778536,-0.7567537677\H,  
-4.4194762051,-2.2142438048,-4.4970028547\C,-3.6232343963,0.0007930122  
,4.5990962701\C,-3.7878694094,0.2449001495,-3.5978435049\H,-3.46378084  
61,1.0589171627,-2.9281890494\C,-3.7105470546,-2.3296046228,0.89279148  
16\C,-4.8425470159,-4.7189592898,-3.4349646133\H,-4.876904477,-5.52228  
4166,-2.6750228491\C,-5.0270737199,-2.6447124384,1.6316718773\H,-4.862  
5655884,-2.6785138793,2.7235328953\H,-5.7952155011,-1.8775477626,1.427  
3396079\H,-5.4351095758,-3.6241157468,1.320149971\C,-3.7882345271,-5.1  
157811506,-4.4884474422\H,-3.7200580547,-4.3595146521,-5.2918653996\H,  
-2.7872741557,-5.2170028487,-4.0323312893\H,-4.0515952793,-6.081226458  
4,-4.9581964758\C,-6.2459458928,-4.6123391737,-4.0674354168\H,-6.53444  
26728,-5.568608312,-4.541521389\H,-7.0081802678,-4.3628884106,-3.30761  
03422\H,-6.2741306837,-3.827573907,-4.845907133\C,-2.7152455926,0.1020  
657217,-4.6967137885\H,-3.000176052,-0.6613112378,-5.4441702049\H,-2.5  
865556892,1.0609126753,-5.2320328839\H,-1.7421063578,-0.1805103857,-4.  
2616781571\C,-5.1484881884,0.6663449696,-4.1932844245\H,-5.0508933199,



1.6188040246,-4.7461467749\H,-5.5330724558,-0.0950288032,-4.8968827818  
\H,-5.9046337603,0.8074298263,-3.3998731827\C,7.2109748876,0.158376496  
5,0.3879479787\H,7.3710795347,0.3075177387,1.4728193403\C,3.7345844693  
,1.664516883,-3.025593608\H,2.6623726529,1.925405103,-3.0361289666\C,2  
.7792679756,2.0581265413,2.0161302491\H,1.7356730324,1.9920992627,1.66  
45055699\C,7.2800213301,-1.3586172533,0.1171003935\H,8.2722108782,-1.7  
588005053,0.3974028893\H,6.5150303346,-1.9015530288,0.6979686216\H,7.1  
145823436,-1.5836747549,-0.9514603074\C,8.3363545506,0.9041576599,-0.3  
555136647\H,8.2665384769,0.7557833031,-1.4486579075\H,8.2974702869,1.9  
904055672,-0.1574966175\H,9.3257860217,0.5318428044,-0.0328689282\C,2.  
8946246816,1.136305585,3.242788889\H,2.7861884138,0.0766699908,2.95640  
90398\H,3.8641464876,1.250643009,3.7608598987\H,2.1019194574,1.3758085  
287,3.973685254\C,3.0402401053,3.5291303585,2.4071796113\H,2.889162791  
1,4.2034896408,1.5463313494\H,2.3538499848,3.8459119998,3.2140826981\H  
,4.0778098731,3.659997153,2.7660286485\C,4.514528162,2.8238478716,-3.6  
801218232\H,4.3693299127,3.7704001943,-3.1303302619\H,5.5992498212,2.6  
085603784,-3.7009381669\H,4.1793685287,2.9787017097,-4.7222250389\C,3.  
8846784571,0.3647176201,-3.8401766568\H,3.523286297,0.5247874987,-4.87  
28468174\H,4.9385952606,0.0372472488,-3.905802972\H,3.2790441726,-0.43  
95223163,-3.3925657059\C,-2.6072337506,-3.3466809477,1.2508711465\H,-2  
.9012683261,-4.3783848405,0.9824551487\H,-1.6721389939,-3.098970332,0.  
7213587798\H,-2.4098148867,-3.3280354821,2.3381844362\H,-3.3632580564,  
-1.3443554249,1.2425856847\F,-3.5082673419,1.3161112404,4.9224912485\F  
, -4.5600567146,-0.0694468254,3.6112524631\F,-4.1431334398,-0.630833337  
1,5.6775696299\O,5.9153518194,-4.2136342247,-1.5165061806\C,6.62962155  
21,-5.4139755355,-1.1905620099\H,5.9765162451,-6.3027238314,-1.2684660  
269\H,7.4387225305,-5.488751299,-1.9320611782\H,7.0637286619,-5.355750  
1048,-0.1753016449\Version=ES64L-G09RevD.01\State=1-A\HF=-3628.110813  
\RMSD=4.093e-09\RMSF=2.864e-06\Dipole=3.4483712,-3.074769,4.8172237\Qu  
adрупole=0.2031086,14.9162425,-15.1193512,-29.5652531,13.4279183,-21.4  
692723\PG=C01 [X(C66H71F3N1O5P1)]\@

E-3a/1c (Type I; conf3)

1\1\GINC-WORKER1\FOpt\RTPSS\STPSS\def2SVP\W06\C66H71F3N1O5P1\JHIOE\05-Au  
g-2016\0\#p tpsstps/def2svp/w06 densityfit empiricaldispersion=gd3 o  
pt scrf=(smd,solvent=ch2cl2,read)\title\0,1\P,0.1820377801,-0.401337  
9141,-1.3061355126\O,-1.266844831,0.2907014909,-1.7787031627\O,0.70520  
66869,0.7813564872,-0.2097637258\O,1.0372265005,-0.4638818885,-2.53742  
87103\O,-0.0532434134,-1.596679409,-0.3864374786\C,-1.7751283144,2.114  
2536878,-0.3084612331\C,-2.1206454151,0.8814130583,-0.8712345959\C,-3.  
3776411915,0.2385453204,-0.6374634689\C,-4.2739460799,0.8598660741,0.2  
221962946\H,-5.2526914682,0.4025061647,0.4013827292\C,-3.9446718826,2.  
0654929746,0.9062355579\C,-2.6668049233,2.6918486478,0.6689239526\C,-2  
.3222410891,3.8368795428,1.4497789713\H,-1.3378046054,4.2952489976,1.3  
189380793\C,-3.2074895487,4.3617280889,2.3797858883\H,-2.9148341075,5.  
2341979205,2.974241954\C,-4.4862447135,3.7743305261,2.5728033064\H,-5.  
1779601523,4.2013524007,3.3069967641\C,-4.8416150544,2.6452539582,1.85  
31821716\H,-5.8096900335,2.1601539633,2.0191725377\C,-0.5051008481,2.7  
90227295,-0.6997973886\C,0.710257431,2.1072982766,-0.5925641588\C,1.98  
1377312,2.7388727317,-0.7684226458\C,1.9956565862,4.0768504383,-1.1368  
547843\H,2.9530120078,4.59499184,-1.2545830277\C,0.7915305077,4.799580  
3727,-1.3799856947\C,-0.4814537076,4.1512920728,-1.1783064533\C,-1.667  
5399774,4.8839145453,-1.4874855786\H,-2.6400684107,4.3943647378,-1.382  
1916647\C,-1.6032097288,6.1963283669,-1.9318944622\H,-2.5275594207,6.7  
341952297,-2.1696601205\C,-0.3497766474,6.846111893,-2.0895471827\H,-0  
.3128923807,7.8853558402,-2.4339891438\C,0.8222678121,6.1555543419,-1.

8250692807\H,1.7970604529,6.6374314551,-1.962404439\C,-2.1992872325,-0.5136992651,4.147777239\C,-1.6284280549,-1.5929298468,4.8399341558\H,-2.1240096704,-2.004422029,5.7230686658\C,-0.4193703139,-2.1391575455,4.3967113825\H,0.0166967804,-2.9821825599,4.9398255886\C,0.2093345949,-1.6328790845,3.2367193093\C,-0.3723426546,-0.5390546343,2.5548674388\H,0.1146445117,-0.10304248,1.6798689183\C,-1.5649773606,0.0196339427,3.0119741955\H,-2.001324931,0.871369438,2.4831871145\C,1.477904748,-2.2304643864,2.76820147\C,2.4657168731,-2.7360876945,3.7732756467\H,3.493958281,-2.6738297041,3.3824871606\H,2.2582976149,-3.7933669938,4.0223852911\H,2.3850970072,-2.1491737124,4.7007051759\N,1.7085313748,-2.2588400474,1.4751946871\H,0.9472409587,-1.8963750467,0.796114701\C,2.8312993714,-2.779917891,0.7712673321\C,3.2583393739,-2.0773090451,-0.3717805924\H,2.7864481147,-1.1320190737,-0.6514624769\C,4.3143719276,-2.5581855467,-1.1484027493\H,4.6270710678,-1.9831799254,-2.0215890056\C,4.9611607906,-3.7596575599,-0.7892928343\C,4.5167630152,-4.4763562104,0.3462837625\H,5.0077774164,-5.4209283036,0.5987594243\C,3.4601829824,-3.9973149173,1.1166869587\H,3.1021335949,-4.591766789,1.9599645033\C,3.2389074558,1.9699010587,-0.4926221001\C,4.0593122018,1.5163681136,-1.5583552021\C,3.5991820088,1.6876423439,0.8551630444\C,5.2357223514,0.8064850188,-1.2506019445\C,4.7766711633,0.9630420826,1.1080308263\C,5.6083046679,0.5072828106,0.0695327159\H,5.8707074023,0.4488816766,-2.0698513211\H,5.0485232313,0.7427795647,2.1444376757\C,-3.7090345388,-1.0446781829,-1.3372849139\C,-3.8516430482,-2.2518428415,-0.6009295326\C,-3.8969111517,-1.0504631791,-2.7495808425\C,-4.1880675192,-3.4329584442,-1.29161926\C,-4.2302487971,-2.2561696932,-3.3894842417\C,-4.3808695724,-3.4620566941,-2.6810744366\H,-4.2973914735,-4.3667994451,-0.7264310388\H,-4.3825671926,-2.2518163107,-4.475289558\C,-3.5059625001,0.0915420823,4.5964807099\C,-3.7939501769,0.2241711333,-3.5901826157\H,-3.4921065342,1.0486385364,-2.9229984209\C,-3.6281266689,-2.3254537205,0.9104005451\C,-4.7483882012,-4.7603688474,-3.3937256155\H,-4.7530444402,-5.5586272186,-2.6277194091\C,-4.9383267671,-2.6429302519,1.6594054529\H,-4.7681614027,-2.6650778075,2.750613379\H,-5.7126464981,-1.8830020975,1.4516906987\H,-5.3416187749,-3.6281473339,1.3597808746\C,-3.7035568939,-5.142384331,-4.4618068116\H,-3.6658360585,-4.3914314433,-5.2724383352\H,-2.6928582482,-5.2177836597,-4.022530791\H,-3.953585778,-6.1174023155,-4.9189826769\C,-6.1637974098,-4.6886649866,-4.0038876103\H,-6.4409696903,-5.6566515958,-4.4606580673\H,-6.9184756479,-4.4434314,-3.2352401545\H,-6.2194080188,-3.9159175242,-4.7929493599\C,-2.7197008795,0.1090474188,-4.6908559235\H,-2.9877129363,-0.6579169452,-5.4412048571\H,-2.6131522517,1.0726504784,-5.2227504362\H,-1.7397438165,-0.1529010802,-4.2582296439\C,-5.1666870523,0.6063974925,-4.18369742\H,-5.0970851759,1.5594349777,-4.7398570282\H,-5.5317833376,-0.1673154011,-4.8841740818\H,-5.9245462296,0.7284556566,-3.3887910824\C,6.8853850399,-0.2825920503,0.3444054478\H,7.1019256416,-0.8603084827,-0.5744649304\C,3.6938633609,1.7808896162,-3.0201975922\H,2.6304355748,2.075573304,-3.0416128703\C,2.7500037166,2.2052494529,2.018813862\H,1.7006603901,2.2310551412,1.6772895342\C,8.0760063662,0.6710209247,0.5838303317\H,9.0139351255,0.1025541491,0.7248464494\H,8.2140504869,1.3567309141,-0.2711224224\H,7.9096840072,1.2860188013,1.4878646487\C,6.7385871965,-1.2895833758,1.4997175417\H,6.6293298284,-0.7801126951,2.4745575974\H,5.8585238916,-1.9400398801,1.3534107244\H,7.6339480759,-1.93385683,1.563106087\C,2.7956909428,1.3065045173,3.2663062768\H,2.5987050172,0.2519636134,3.009547635\H,3.7754057425,1.354703401,3.7758054202\H,2.0301190084,1.6300807657,3.9936014787\C,3.1503431709,3.654022846,2.3751961775\H,3.0501474095,4.3228151562,1.5024946826\H,2.5081134155,4.0483838511,3.1841954916\H,4.2006545244,3.6952890332,2.7182598171\C,4.5254726844,2.9500543319,-3.

5893214023\H,4.3933815778,3.8699444935,-2.9931190086\H,5.6033545114,2.7013402316,-3.5916294138\H,4.2254537257,3.1709218296,-4.6303041912\C,3.829067224,0.5265408029,-3.9048782949\H,3.4825920994,0.752513068,-4.930287248\H,4.8777671101,0.184389415,-3.9809888882\H,3.2044544644,-0.2901348482,-3.5087003772\C,-2.5154680216,-3.3303655178,1.2726023698\H,-2.8041471339,-4.3675281779,1.0198821716\H,-1.5858093321,-3.0823493783,0.7340330462\H,-2.3110054102,-3.2960732249,2.3581425297\H,-3.2873030245,-1.3341925516,1.2491922651\F,-3.3876881571,1.4236054367,4.840206381\F,-4.4713303311,-0.0385567678,3.6419388963\F,-3.9914337463,-0.4789365863,5.7237045887\O,5.9996193254,-4.3014015307,-1.4676911346\C,6.474710804,-3.6389483433,-2.6487642967\H,6.8558789774,-2.6282309363,-2.4134561403\H,7.2979377907,-4.262210501,-3.0278020457\H,5.6802212748,-3.5686704609,-3.4140882817\Version=ES64L-G09RevD.01\State=1-A\HF=-3628.1123998\RMSD=3.943e-09\RMSE=2.938e-06\Dipole=3.3558722,-2.0808227,3.9052927\Quadrupole=2.1175928,2.4004804,-4.5180731,-16.4529072,3.5165543,-17.6025227\PG=C01 [X(C66H71F3N1O5P1)]\@

E-3a/1c (Type I; conf4)

1\1\GINC-WORKER0\FOpt\RTPSS\TPSS\def2SVP/W06\C66H71F3N1O5P1\JHIOE\05-Au  
g-2016\0\#p tpsstps/def2svp/w06 densityfit empiricaldispersion=gd3 o  
pt scrf=(smd,solvent=ch2cl2,read)\title\0,1\P,0.1921816262,-0.400006  
7496,-1.3806758527\O,-1.2412048303,0.3325347986,-1.839448291\O,0.74888  
86327,0.7448021667,-0.2566827775\O,1.0398199179,-0.461033189,-2.616735  
4683\O,-0.072644585,-1.6063577784,-0.4830597686\C,-1.7029865888,2.1418  
151528,-0.340962787\C,-2.0833567056,0.9306579428,-0.9262762869\C,-3.36  
1854265,0.3243463166,-0.7092056331\C,-4.2361213947,0.9528938115,0.1678  
61275\H,-5.2279738295,0.5217141717,0.3400007993\C,-3.8695642174,2.1322  
913661,0.87789485\C,-2.5765278342,2.7292348116,0.646164179\C,-2.199045  
2902,3.851184354,1.445088313\H,-1.2040343384,4.2869430385,1.3162279887  
\C,-3.0641350235,4.3780737429,2.3927768772\H,-2.746321507,5.2311018339  
,3.0023216412\C,-4.3541436653,3.8158001122,2.5870426819\H,-5.028555477  
3,4.2428426375,3.3371354559\C,-4.7437315547,2.7124835344,1.8455808814\H,  
-5.7214774128,2.2469806568,2.0101626117\C,-0.4150582137,2.7887913785  
, -0.7227410738\C,0.7843278299,2.0790515908,-0.612505728\C,2.0682731644  
,2.6908783902,-0.7618407337\C,2.1125869676,4.0270472544,-1.1353003451\H,  
3.0817481905,4.525539062,-1.2396827283\C,0.9257002498,4.7695978613,-  
1.4015615971\C,-0.3608470107,4.1490557448,-1.2001261585\C,-1.530875200  
8,4.9058210122,-1.5117193966\H,-2.513678336,4.439067444,-1.3996122785\C,  
-1.4379725315,6.2124100158,-1.9684650847\H,-2.3506251519,6.769041142  
3,-2.2082440009\C,-0.1705965663,6.8322488945,-2.134717039\H,-0.1113270  
148,7.8666296344,-2.490454473\C,0.9861956583,6.1199310638,-1.860659751  
1\H,1.9711340559,6.5799000251,-2.0000628757\C,-2.3141448127,-0.5986515  
884,4.0704818794\C,-1.720848348,-1.6618649423,4.7681515237\H,-2.212781  
0328,-2.0867838695,5.6468550877\C,-0.4954656308,-2.177418521,4.3328725  
043\H,-0.042086859,-3.009872087,4.8779960479\C,0.1267579769,-1.6583226  
511,3.1755141237\C,-0.4751667347,-0.5771699762,2.4903573728\H,0.006710  
4877,-0.1313458898,1.617071145\C,-1.6839121911,-0.0480491261,2.9407390  
243\H,-2.1384743731,0.7926861292,2.4108863404\C,1.4027625876,-2.241341  
9883,2.7070423667\C,2.3964531172,-2.7453867465,3.708626411\H,3.4212660  
407,-2.7013493959,3.3067147543\H,2.1794437298,-3.7961382352,3.97572084  
21\H,2.3310874041,-2.146030096,4.6297108106\N,1.6354877487,-2.26306648  
17,1.4152096857\H,0.8815755178,-1.8994777719,0.7270537763\C,2.76071484  
35,-2.794408501,0.7213463894\C,3.2586748951,-2.0624433178,-0.372460882  
6\H,2.8461693139,-1.079553953,-0.6158776998\C,4.3178984405,-2.56220989  
72,-1.1334699182\H,4.6930753225,-1.9650533872,-1.9660767114\C,4.893269  
7821,-3.8085539144,-0.8065553702\C,4.3753936857,-4.5526225269,0.279201

5358\H,4.813073083,-5.5294460155,0.5060407391\C,3.3165963912,-4.054271  
3352,1.0339319478\H,2.8986302802,-4.6592250006,1.8419551654\C,3.309310  
2557,1.913608321,-0.4394361187\C,4.1732839179,1.4607161204,-1.46932036  
57\C,3.6174201999,1.6391724131,0.9239498398\C,5.3416174961,0.758596597  
5,-1.1128668613\C,4.7870822566,0.9210042453,1.2247030174\C,5.663258820  
8,0.467471503,0.2215879282\H,6.0130988741,0.4043188642,-1.9039402951\H  
,5.0218935006,0.7073166584,2.2719358633\C,-3.7435933747,-0.9235470235,  
-1.4463102442\C,-3.9348008114,-2.1473911322,-0.7448069561\C,-3.9352553  
07,-0.8789860126,-2.8552518857\C,-4.3263421992,-3.2907759701,-1.464983  
9004\C,-4.3247212614,-2.0526398065,-3.5272879913\C,-4.5289119146,-3.26  
8633189,-2.8552777955\H,-4.4697861063,-4.2310336098,-0.9195216324\H,-4  
.4824032237,-2.0184483579,-4.6124582496\C,-3.6374398865,-0.0244617936,  
4.5121093256\C,-3.7809139276,0.4128565457,-3.6618571123\H,-3.448845217  
1,1.2079484041,-2.9737985117\C,-3.6990907973,-2.2802804113,0.761259359  
5\C,-4.9480045535,-4.524540746,-3.6145647528\H,-5.0598397713,-4.238327  
6777,-4.6772864549\C,-4.9998856974,-2.6332595478,1.5106851767\H,-4.818  
2924045,-2.6931705946,2.5986249802\H,-5.7822440265,-1.8730086562,1.337  
2746266\H,-5.3979720793,-3.6104590314,1.1802360821\C,-6.3101025987,-5.  
0582687471,-3.1262147219\H,-6.2590455314,-5.3757442707,-2.068319064\H,  
-7.0954025663,-4.2858911562,-3.2107823605\H,-6.6231175153,-5.933319639  
9,-3.724870952\C,-3.8626577078,-5.6181131056,-3.5360567716\H,-4.149436  
5915,-6.4976353309,-4.1414638994\H,-2.8928662292,-5.2442047108,-3.9103  
122596\H,-3.7151861603,-5.9592237848,-2.4947398105\C,-2.7078861922,0.2  
841908857,-4.7619058405\H,-2.9908684082,-0.4706118693,-5.5185188209\H,  
-2.5801121785,1.2496052526,-5.2854472565\H,-1.7351805543,-0.0017487624  
, -4.3278813691\C,-5.1361585167,0.8654908199,-4.2451259775\H,-5.0270289  
55,1.831002761,-4.7727212879\H,-5.5318312698,0.1287008573,-4.968386615  
2\H,-5.8890417179,0.9957088336,-3.4467020512\C,6.9318490471,-0.3110810  
075,0.5595934448\H,7.2593892336,-0.8074910713,-0.3739900583\C,3.864710  
2172,1.7144315871,-2.9457074876\H,2.8138192215,2.0455712043,-3.0071673  
988\C,2.7254761371,2.1653454126,2.0518318628\H,1.6921291671,2.20555387  
24,1.6665278079\C,8.0618956811,0.6443507053,0.9999405714\H,8.995280445  
6,0.0845824349,1.1951740937\H,8.2707784008,1.4005233596,0.2222123188\H  
,7.7843992804,1.179300082,1.9272750803\C,6.6952803391,-1.4112713963,1.  
6121423617\H,6.4494062587,-0.9830465198,2.6011123991\H,5.8677633642,-2  
.0787324696,1.3139981481\H,7.6049171106,-2.0264646573,1.7355844135\C,2  
.7036921427,1.2642129938,3.2984999838\H,2.4930279345,0.216152728,3.028  
7505059\H,3.663219567,1.2892139042,3.8461895151\H,1.9165540308,1.60167  
762,3.9959522363\C,3.1312070702,3.607626232,2.4273462242\H,3.083075972  
7,4.2781790529,1.5516391864\H,2.4588685281,4.0120717822,3.2062831033\H  
,4.1653615687,3.6309171454,2.8181223459\C,4.7550413319,2.8438872637,-3  
.5050811146\H,4.6364432322,3.7762749005,-2.9254098816\H,5.8229172769,2  
.5576239693,-3.4695940484\H,4.4958577904,3.0598986999,-4.5580201697\C,  
3.9819254102,0.4378452038,-3.8012929626\H,3.6958210451,0.6578560578,-4  
.8463175934\H,5.0152134091,0.0452588834,-3.8194441377\H,3.3015348033,-  
0.341058341,-3.4209305998\C,-2.5812014872,-3.2988535533,1.0663436762\H  
, -2.8704397288,-4.3220699008,0.7622468452\H,-1.655831893,-3.0228173765  
,0.5338621361\H,-2.3687884687,-3.3197295897,2.1510211291\H,-3.35489490  
95,-1.304167368,1.138376681\F,-3.5289107792,1.285316857,4.8596136755\F  
, -4.5651446204,-0.0793269264,3.514239978\F,-4.1652113035,-0.6760985754  
,5.5747007111\O,5.9329484304,-4.3666970279,-1.4705509422\C,6.514615076  
9,-3.6475443359,-2.5673274303\H,6.9169179152,-2.6729124161,-2.23420357  
07\H,7.3371756256,-4.2785875048,-2.9347045682\H,5.780100471,-3.4892247  
484,-3.3781297708\\Version=ES64L-G09RevD.01\State=1-A\HF=-3628.1121118  
\RMSD=4.554e-09\RMSF=2.077e-06\Dipole=3.3194283,-2.0043302,4.0460458\Q  
uadrupole=3.1634588,2.3524672,-5.5159259,-15.2506057,3.4492255,-17.720

9473\PG=C01 [X(C66H71F3N1O5P1)]\@

E-3a/1c (Type I; conf5)

1\1\GINC-WORKER1\FOpt\RTPSS\TPSS\def2SVP\W06\C66H71F3N1O5P1\JHIOE\05-Au  
g-2016\0\#p tpsstps/def2svp/w06 densityfit empiricaldispersion=gd3 o  
pt scrf=(smd,solvent=ch2cl2,read)\title\0,1\p,0.2096811533,-0.593502  
2657,-1.2467709994\O,-1.2109852166,0.0731316734,-1.8278155197\O,0.7460  
235268,0.6828024588,-0.2610334002\O,1.0915604295,-0.8030096494,-2.4420  
678363\O,-0.0842462708,-1.6770642663,-0.2131069822\C,-1.6926178301,2.0  
613776847,-0.5846887041\C,-2.0666712541,0.7850082931,-1.0137854711\C,-  
3.3487740601,0.211287156,-0.7384271229\C,-4.2346458631,0.9480524139,0.  
0375195031\H,-5.2307444433,0.5439511305,0.2469226474\C,-3.8757433989,2  
.2095775903,0.5947119127\C,-2.5792994033,2.7717666772,0.3046150174\C,-  
2.2117680127,3.9903271628,0.9523285556\H,-1.2157833577,4.4079272199,0.  
7792932352\C,-3.0890407534,4.6376425485,1.8099410635\H,-2.7788813987,5  
.565211269,2.3035984824\C,-4.3815046882,4.1043299561,2.0597297639\H,-5  
.0658335834,4.6263199383,2.7372465259\C,-4.7621460247,2.9119398192,-1.4  
65600187\H,-5.743762745,2.4732072145,1.675570959\C,-0.3939052705,2.650  
385881,-1.0200668109\C,0.799125349,1.9597437209,-0.7835745313\C,2.0883  
569238,2.548314598,-0.9688267866\C,2.1466789368,3.8236715768,-1.514932  
9246\H,3.1201040482,4.3062420194,-1.6516099863\C,0.9719642639,4.525176  
409,-1.911546061\C,-0.3222505294,3.9371061337,-1.6675605418\C,-1.48043  
76641,4.6460265912,-2.1098326476\H,-2.4681625967,4.1978588914,-1.96642  
52472\C,-1.3685477599,5.8812522282,-2.7310276448\H,-2.2711087941,6.401  
3859741,-3.070427945\C,-0.0941636049,6.4738221256,-2.9395351663\H,-0.0  
203696788,7.4527283149,-3.4256748647\C,1.0514905192,5.8041084855,-2.54  
03456065\H,2.0418009722,6.2418784917,-2.709952074\C,-2.3804602249,-0.1  
096310444,4.1395499337\C,-1.835927297,-1.1103141517,4.9590517332\H,-2.  
3588446011,-1.424377602,5.8661189801\C,-0.6180799032,-1.70458059,4.611  
360317\H,-0.2031471243,-2.4866993006,5.253271484\C,0.0463223254,-1.327  
0456071,3.4231136709\C,-0.5088690414,-0.3096104507,2.6120326139\H,0.00  
47308397,0.0272963532,1.7086823241\C,-1.7106806492,0.2980193734,2.9723  
341317\H,-2.127995894,1.08867108,2.3431119005\C,1.3219616344,-1.977025  
7212,3.0546409144\C,2.2737290223,-2.4042406947,4.1281484437\H,3.311953  
2095,-2.4007940355,3.7593170698\H,2.0355530557,-3.4288608118,4.4691032  
817\H,2.1844317974,-1.7320828877,4.9950798738\N,1.5925051075,-2.119714  
6349,1.7781734693\H,0.8547733648,-1.8246324357,1.0437267915\C,2.730526  
525,-2.7031544123,1.1513631637\C,3.2076266562,-2.0768162925,-0.0163713  
172\H,2.7792007408,-1.1292150647,-0.3521918421\C,4.2592350468,-2.63722  
95422,-0.7415725111\H,4.615375122,-2.1207919857,-1.6338090317\C,4.8525  
624235,-3.840386642,-0.305106706\C,4.3702703082,-4.4709356314,0.864294  
7673\H,4.8253999138,-5.4138161332,1.1820128472\C,3.3141886509,-3.91407  
96196,1.5836236836\H,2.9187008173,-4.4449470262,2.4528180718\C,3.32926  
02775,1.8454397532,-0.50420252\C,4.2627976141,1.3241713958,-1.43739883  
26\C,3.5961089779,1.7625746196,0.8923396385\C,5.4715747772,0.776057082  
2,-0.9611426006\C,4.8152493879,1.2060757486,1.3146415099\C,5.779248265  
3,0.7264201619,0.4081907105\H,6.1939991578,0.3916210281,-1.6894849963\  
H,5.0425753279,1.162674404,2.3858576327\C,-3.7178020127,-1.1216401895,  
-1.315065779\C,-3.9237808531,-2.2447198323,-0.468479915\C,-3.878586721  
,-1.2589692885,-2.7241902556\C,-4.30368322,-3.4718560111,-1.0473989185  
\C,-4.2550565658,-2.5063618614,-3.2501972677\C,-4.4768645624,-3.628218  
2231,-2.4309878319\H,-4.4631043973,-4.3404006632,-0.3963974908\H,-4.38  
34584629,-2.6027743555,-4.3348403538\C,-3.694367308,0.5473925381,4.483  
0837536\C,-3.6970540014,-0.0819493965,-3.6851108408\H,-3.3613265949,0.  
7892378273,-3.0986977633\C,-3.7236398983,-2.1808836122,1.046623916\C,-  
4.8797753217,-4.9758090603,-3.0240148719\H,-5.0487545051,-5.6658681506

,-2.1756459863\C,-5.0492571883,-2.397861966,1.8036701197\H,-4.89198333  
01,-2.318677586,2.8940409052\H,-5.8049496373,-1.6461405562,1.514020520  
8\H,-5.4702113149,-3.3989839791,1.5950897403\C,-3.7502510184,-5.567964  
1662,-3.8922537988\H,-3.5411700513,-4.9240984572,-4.7664216138\H,-2.81  
36854736,-5.6689354894,-3.3151978233\H,-4.0318864615,-6.5684664238,-4.  
2694147722\C,-6.1974332326,-4.8812378814,-3.8200311818\H,-6.5018758746  
,-5.8784581506,-4.1873571342\H,-7.0152325694,-4.48126887,-3.1941983414  
\H,-6.0870904132,-4.2202302735,-4.6992742088\C,-2.6128492924,-0.365849  
6339,-4.7443109465\H,-2.9088068869,-1.1933275128,-5.4155498275\H,-2.44  
55831947,0.5289484649,-5.372004412\H,-1.6560219801,-0.6309563839,-4.26  
43151854\C,-5.0381327523,0.3087764278,-4.3420753482\H,-4.9096939539,1.  
1974978969,-4.9871519726\H,-5.4334632298,-0.510877005,-4.9701985845\H,  
-5.8000376278,0.5489085432,-3.5786566225\C,7.0975055561,0.1631802613,0  
.9369874432\H,7.2287036017,0.5798664398,1.95395315\C,4.0016528455,1.37  
28497102,-2.9441631951\H,2.9580447986,1.7010423629,-3.0872450569\C,2.6  
229887947,2.3472940963,1.9194009265\H,1.6066892638,2.2640296659,1.4986  
551308\C,7.0395387428,-1.3725554937,1.077838814\H,7.9591592958,-1.7536  
394297,1.5589803399\H,6.1750810273,-1.6898924604,1.6872459155\H,6.9494  
385093,-1.8535758056,0.0889317689\C,8.3161135161,0.5877796122,0.096975  
9603\H,8.2926002704,0.1326627882,-0.9099989832\H,8.360396946,1.6848580  
008,-0.0261838066\H,9.2516429578,0.2591481271,0.5847731496\C,2.6148075  
915,1.5929503631,3.2600688044\H,2.4966306328,0.5069152278,3.1068846042  
\H,3.5445040719,1.7567945427,3.8345378775\H,1.7747446301,1.9435667778,  
3.8853872063\C,2.907441431,3.8497827964,2.136594468\H,2.8423263088,4.4  
10011767,1.1874528772\H,2.1776530375,4.2869869696,2.8427542818\H,3.921  
1700962,3.9985458356,2.5521237015\C,4.9200704268,2.4053437597,-3.63054  
69115\H,4.8069253405,3.4077685686,-3.180785491\H,5.9829347515,2.112709  
7771,-3.5408771137\H,4.6800090227,2.4839169586,-4.7069051478\C,4.12412  
5464,-0.0129778095,-3.6077965773\H,3.8999917361,0.065386366,-4.6877554  
546\H,5.1442774094,-0.4289269816,-3.5114339683\H,3.3993163762,-0.71404  
7208,-3.1633545913\C,-2.639822959,-3.172590613,1.5171111191\H,-2.94895  
0761,-4.2213453577,1.3512713067\H,-1.6956284887,-2.9937113121,0.976366  
5888\H,-2.4525753398,-3.0462346517,2.5991331344\H,-3.362944889,-1.1701  
603842,1.2954914888\F,-3.563190627,1.8925967699,4.6299208338\F,-4.6197  
662344,0.3600670691,3.4994443111\F,-4.2377175521,0.0717969779,5.627729  
2152\O,5.8810462955,-4.4548209431,-0.9369925474\C,6.350531661,-3.91352  
23661,-2.1811825441\H,6.754511626,-2.8933292804,-2.0479825423\H,7.1548  
326585,-4.586600031,-2.5125641659\H,5.5442511026,-3.897190111,-2.93708  
13573\\Version=ES64L-G09RevD.01\State=1-A\HF=-3628.1115801\RMSD=8.630e  
-09\RMSF=4.674e-05\Dipole=3.1621417,-1.547493,4.2367765\Quadrupole=0.7  
438252,-1.670903,0.9270778,-13.3946281,5.1045521,-19.2351057\PG=C01 [X  
(C66H71F3N1O5P1)]\@

E-3a/1c (Type II; conf0)

1\1\GINC-LOGIN\FOpt\RTPSSSTPSS\def2SVP/W06\C66H71F3N1O5P1\JHIOE\26-Feb-  
2016\0\#p tpsstps/def2svp/w06 densityfit empiricaldispersion=gd3 opt  
scrf=(smd,solvent=ch2cl2,read)\title\0,1\P,-0.3485528593,-0.6164820  
295,-0.8078875776\O,-1.8285633848,0.0150235307,-1.2839175287\O,0.32504  
39233,0.7524073963,-0.0724793834\O,0.3523341496,-1.0237924087,-2.06937  
92832\O,-0.5245782624,-1.5623757922,0.3814397747\C,-2.1332576741,2.110  
9422419,-0.1654713839\C,-2.5721010221,0.8122302657,-0.4406662548\C,-3.  
8173063676,0.2924292864,0.0358719587\C,-4.5860334497,1.1048745248,0.85  
9750819\H,-5.5542970944,0.7420498069,1.2204529596\C,-4.1333521487,2.38  
76262501,1.2835189881\C,-2.8783302504,2.8959206213,0.787307364\C,-2.40  
57217326,4.1436047831,1.2956847356\H,-1.4354330835,4.5224860579,0.9618

267826\C,-3.1465735557,4.8671243812,2.2186981266\H,-2.7568403773,5.816  
2432033,2.6027233688\C,-4.4032257805,4.3853853103,2.6736571592\H,-4.98  
31527357,4.9701094393,3.3959647007\C,-4.8824743319,3.1676947666,2.2156  
415973\H,-5.8401298794,2.7749593198,2.5755999852\C,-0.9178262781,2.648  
0622631,-0.8419878908\C,0.2950520049,1.9597981281,-0.7427056931\C,1.53  
40647997,2.4961962899,-1.2136224114\C,1.5041612706,3.7161086884,-1.875  
2512382\H,2.4424318805,4.1676792117,-2.2142196502\C,0.2840996668,4.412  
0130847,-2.1140940072\C,-0.9515865975,3.8761712779,-1.5981485534\C,-2.  
1617586417,4.5793984618,-1.8816693445\H,-3.113019359,4.1662751196,-1.5  
343418031\C,-2.1491628129,5.7655035648,-2.600902094\H,-3.0918892457,6.  
2832416513,-2.8095462695\C,-0.9261982671,6.3101458899,-3.0763075181\H,  
-0.92894109,7.2508015939,-3.6377518217\C,0.2639063933,5.6399944387,-2.  
8415959697\H,1.2127189779,6.039217732,-3.2180075814\C,4.7288140707,-3.  
1960723085,-0.0907255254\C,5.2146906461,-2.9287268946,1.1964390632\H,6  
.2690393206,-3.0895704837,1.4340101227\C,4.3509076904,-2.425828631,2.1  
734716145\H,4.7606384048,-2.2136262691,3.1629462572\C,2.9861065775,-2.  
1825528638,1.8844007452\C,2.5040120692,-2.5181920136,0.5937783967\H,1.  
4488325598,-2.3930814653,0.3360474828\C,3.3664606403,-3.0078362215,-0.  
3840651524\H,2.9779402694,-3.2373229478,-1.3799900944\C,2.1171241461,-  
1.5800772541,2.916281024\C,2.6909238477,-1.2110808572,4.2515146981\H,2  
.0389273718,-0.5065076649,4.7864361766\H,3.6787645273,-0.7453645257,4.  
1134594981\H,2.8311120552,-2.1096608695,4.8786876503\N,0.8540136392,-1  
.321515308,2.6431445431\H,0.4520511786,-1.4512471023,1.6553481351\C,-0  
.1494762966,-0.8251258469,3.5246526857\C,-1.0107274251,0.1743748363,3.  
0353781516\H,-0.8535996022,0.5795223324,2.0325907186\C,-2.0666527662,0  
.6449862692,3.8196611967\H,-2.720406529,1.420609215,3.4155912116\C,-2.  
2913839763,0.0896510535,5.0979791061\C,-1.4248854501,-0.9163985532,5.5  
863169979\H,-1.6227999116,-1.3487751396,6.5715867831\C,-0.3634226873,-  
1.3718320338,4.8086152922\H,0.2663403345,-2.1863872659,5.1758580912\C,  
2.8345067587,1.8254133941,-0.8787855427\C,3.4972860596,0.9881972359,-1  
.8172420561\C,3.4203783134,2.0766257156,0.388264825\C,4.7448754024,0.4  
439385632,-1.4686152153\C,4.676900006,1.5127958893,0.6878305698\C,5.36  
35352609,0.7019006193,-0.2295156582\H,5.2611012391,-0.2039967823,-2.18  
46134437\H,5.1224644027,1.7249021333,1.6651788337\C,-4.2745127748,-1.0  
753994754,-0.3713251022\C,-4.3806781127,-2.1108051753,0.5966968507\C,-  
4.6254582117,-1.3340039733,-1.7268385238\C,-4.8649443984,-3.3707078131  
,0.1944770459\C,-5.0908228617,-2.612849935,-2.0785461688\C,-5.22550485  
1,-3.6464594564,-1.1336416108\H,-4.9524521824,-4.1703616278,0.94017433  
77\H,-5.3621948746,-2.804800796,-3.1235090791\C,5.6496923204,-3.672851  
8049,-1.18592449\C,-4.550628454,-0.254531963,-2.8089454111\H,-4.145968  
9158,0.6623050578,-2.3488257377\C,-3.9514473145,-1.9092913849,2.050017  
521\C,-5.7259762419,-5.0301938466,-1.5381140666\H,-5.7694722465,-5.640  
5432047,-0.6162018519\C,-5.155985647,-1.8920487039,3.0125163074\H,-4.8  
214672203,-1.6768123885,4.0442829847\H,-5.8919112143,-1.1208742157,2.7  
232000809\H,-5.675924993,-2.8681546991,3.0198702489\C,-4.7445882694,-5  
.719671581,-2.5090611416\H,-4.6677781605,-5.1621907526,-3.4607786604\H  
, -3.7322845059,-5.7854773539,-2.0719070325\H,-5.0849135192,-6.74477261  
75,-2.7451885966\C,-7.1482248583,-4.9782687521,-2.1320659346\H,-7.5108  
287281,-5.9973949404,-2.3603240009\H,-7.8599109997,-4.5109706937,-1.42  
80460841\H,-7.1694090605,-4.3969273885,-3.0722892874\C,-3.5948844296,-  
0.651589157,-3.9524496533\H,-3.964586696,-1.5385106491,-4.4996938701\H  
, -3.503203317,0.1757899706,-4.6803011586\H,-2.5887019884,-0.8764628167  
, -3.5609772038\C,-5.9557132791,0.0938382593,-3.3433878045\H,-5.8975159  
23,0.915704585,-4.0806741349\H,-6.4243363546,-0.7743108429,-3.84273402  
57\H,-6.6243314186,0.4155857629,-2.5244811199\C,6.7565604292,0.1315167  
157,0.0403942455\H,6.7364465601,-0.9231292311,-0.2945008011\C,2.898627

0126,0.7258231169,-3.2002905208\H,1.8105414745,0.8909291266,-3.1162974  
61\C,2.7292579068,2.9544140095,1.4345616148\H,1.7813123689,3.313127956  
6,0.9997136633\C,7.8118905143,0.8606751964,-0.8223433001\H,8.811654812  
2,0.4102126929,-0.6807149808\H,7.5618169881,0.8059917322,-1.8964576975  
\H,7.873399641,1.9286793017,-0.5422801625\C,7.1702285341,0.1493617101,  
1.5194399407\H,7.3248801529,1.1815611556,1.8840157014\H,6.4118464813,-  
0.327422372,2.1639110833\H,8.122268041,-0.3945368474,1.6539363878\C,2.  
370478405,2.1460604049,2.6971053379\H,1.7377526809,1.2828374381,2.4358  
281402\H,3.2762525489,1.7703060867,3.2065845465\H,1.8126613447,2.77287  
52894,3.4169624886\C,3.5682565009,4.2014039523,1.7794446557\H,3.786798  
9325,4.7960917754,0.8742145202\H,3.0229671497,4.8492468381,2.490270670  
1\H,4.5318780328,3.9266431352,2.2471169054\C,3.4644161626,1.7239991517  
, -4.2340034321\H,3.2752844323,2.7699076511,-3.9369806265\H,4.557746587  
,1.5960168116,-4.3432717113\H,3.0007921557,1.5623827841,-5.2248884252\  
C,3.0931395665,-0.7221564405,-3.6841156415\H,2.5497542349,-0.872895168  
, -4.63476272\H,4.1555832967,-0.9613367924,-3.8713046599\H,2.6867932798  
, -1.4336836519,-2.949169273\C,-2.9033265689,-2.9517469387,2.4869653311  
\H,-3.3166947893,-3.9771736679,2.4827698165\H,-2.0283142435,-2.9192947  
514,1.8166735169\H,-2.5618850364,-2.733919588,3.5145721982\H,-3.463089  
7445,-0.9248287474,2.1158039308\F,5.6290133976,-2.8300684213,-2.256240  
444\F,6.9398588289,-3.7624552618,-0.7829843032\F,5.2894499448,-4.89543  
94322,-1.6559264814\O,-3.3152990853,0.4394750244,5.9129435257\C,-4.249  
0264169,1.4282877189,5.4535436867\H,-4.9903768385,1.5364005778,6.25875  
94641\H,-3.748508543,2.3979103693,5.2785264684\H,-4.7535734725,1.09639  
42162,4.5286596211\\Version=ES64L-G09RevD.01\State=1-A\HF=-3628.111929  
8\|RMSD=4.243e-09\|RMSF=5.469e-06\|Dipole=0.8786028,0.756697,6.0365127\|Qu  
adropole=5.0170015,-8.7956937,3.7786922,-11.1236843,11.4632625,-10.621  
3945\|PG=C01 [X(C66H71F3N1O5P1)]\|@

E-3a/1c (Type II; conf1)

1\1\GINC-LOGIN\FOpt\RTSPSS\def2SVP\W06\C66H71F3N1O5P1\JHIOE\07-Mar-  
2016\0\#p tpsstps/def2svp/w06 densityfit empiricaldispersion=gd3 opt  
scrf=(smd,solvent=ch2cl2,read)\|title\0,1\|P,0.1764129624,0.66926788,  
-0.942260474\O,1.6161145548,0.0530587869,-1.5415527553\O,-0.4342057451  
, -0.7131194408,-0.175648839\O,-0.6216143166,1.0939201614,-2.1384301654  
\O,0.4441054208,1.599420719,0.2428035907\C,2.0348473948,-2.0367248233,  
-0.4534920783\C,2.4357447021,-0.73367547,-0.7617900936\C,3.7096245149,  
-0.1994450167,-0.3899670117\C,4.5509654982,-1.0027736071,0.3692951677\  
H,5.5410465944,-0.6294174915,0.6514447432\C,4.1486279766,-2.2903872378  
,0.8271018371\C,2.8636168034,-2.8147108888,0.4334697693\C,2.4495361378  
, -4.0687411446,0.9756085323\H,1.4603043298,-4.459247511,0.7187105968\C  
,3.2711832835,-4.7820764537,1.8361936574\H,2.9261686232,-5.7359325741,  
2.2500070857\C,4.5537927831,-4.2836153674,2.1900953169\H,5.1969221656,  
-4.8605761423,2.8635002085\C,4.979784625,-3.0606128335,1.6956722109\H,  
5.9580440821,-2.6554244276,1.9777442351\C,0.7792783937,-2.5874852577,-  
1.038806887\C,-0.4341990016,-1.9188790552,-0.8493866639\C,-1.694394503  
3,-2.4758406931,-1.2335214237\C,-1.6911181067,-3.6950468563,-1.8977099  
175\H,-2.6433725663,-4.162475967,-2.1696373507\C,-0.4797049148,-4.3663  
305105,-2.2319137024\C,0.7801628772,-3.8067979142,-1.8089703237\C,1.98  
02227209,-4.4783679666,-2.1941265468\H,2.9460415939,-4.0457510125,-1.9  
178404953\C,1.9381298743,-5.655190793,-2.9273158381\H,2.8729650127,-6.  
1474878749,-3.2171092858\C,0.6941274004,-6.223713886,-3.3116576658\H,0  
.674470509,-7.1567099206,-3.8854239546\C,-0.4889968801,-5.5852411224,-  
2.9751184178\H,-1.4550558496,-6.0024300423,-3.2817579895\C,-4.82853955  
99,3.203072656,0.1749850582\C,-5.2327086839,2.8643333889,1.4735727473\  
H,-6.2745705815,2.9884040572,1.7783700328\C,-4.3024219265,2.3411665986



.2.3758591317\H,-4.6481719488,2.0737048448,3.3763389157\C,-2.951247234  
3,2.1491213007,1.9996129825\C,-2.5534934693,2.5499188004,0.6989589167\  
H,-1.5128388576,2.4606082831,0.3756741229\C,-3.4820533591,3.060532103,  
-0.2050027783\H,-3.1576563884,3.3422819963,-1.2105507156\C,-2.00412055  
02,1.542051438,2.9575970433\C,-2.4720815057,1.1532669771,4.3277424181\  
H,-1.7746281242,0.4502638924,4.8044503257\H,-3.4632755582,0.679383286,  
4.2598990973\H,-2.5748298112,2.0442763368,4.9728251912\N,-0.7615448728  
,1.3053567847,2.5897892547\H,-0.4337892982,1.4520434329,1.5767794957\C  
,0.3144887836,0.8258143868,3.3914225648\C,1.1495139863,-0.1635497982,2  
.8406226289\H,0.9155798816,-0.5846304555,1.8594912414\C,2.2775199356,-  
0.6042673723,3.5373199955\H,2.9071683197,-1.3743918091,3.0874864943\C,  
2.6006068516,-0.028132632,4.785015115\C,1.7572403432,0.9643921482,5.33  
69484106\H,2.0288555416,1.4117648814,6.2977235665\C,0.6239539084,1.389  
1616431,4.6480324999\H,0.0098179901,2.1939823658,5.0607297624\C,-2.979  
8982949,-1.822228385,-0.8161968885\C,-3.6931179517,-0.9679977055,-1.70  
1152252\C,-3.4968833574,-2.0996169636,0.4751531116\C,-4.9162010053,-0.  
4260265882,-1.2731050692\C,-4.7324543815,-1.5372870575,0.8553670032\C,  
-5.465651122,-0.7063547654,-0.0062953309\H,-5.468599215,0.2359907205,-  
1.9478281\H,-5.1228004458,-1.7648610663,1.8524661489\C,4.1182285086,1.  
1720874719,-0.8336296112\C,4.3006977768,2.2074586702,0.1261163914\C,4.  
3448656031,1.4376966323,-2.212228414\C,4.7401491561,3.4708669852,-0.30  
81125059\C,4.7699936619,2.7236409997,-2.5954183114\C,4.9812820482,3.75  
33024518,-1.6639604996\H,4.8838261198,4.2623272609,0.4369967007\H,4.94  
88082303,2.9312654132,-3.657664316\C,-5.8233414691,3.704764975,-0.8417  
327907\C,4.1769391758,0.3650586815,-3.2907905849\H,3.8231663203,-0.557  
5734654,-2.8009242899\C,3.9891504202,2.001539458,1.609078343\C,5.43430  
66079,5.138551644,-2.11667452\H,5.5688674012,5.0932809595,-3.213946932  
4\C,5.2636143529,2.0055134767,2.4766884962\H,5.0125235607,1.7932710535  
,3.5324033055\H,5.9853929163,1.2420171659,2.136086274\H,5.7700489667,2  
.9881252995,2.4396422592\C,6.78927671,5.5322580265,-1.4941815994\H,6.7  
155598384,5.6151113886,-0.3940584632\H,7.5691468604,4.7852146972,-1.72  
69664912\H,7.1253380737,6.5110327487,-1.8830244577\C,4.3586101085,6.20  
448972,-1.8209701742\H,4.6709964102,7.1925249615,-2.2063739718\H,3.395  
4297252,5.9402400097,-2.2930096979\H,4.1864121995,6.3057152706,-0.7334  
801047\C,3.1158703445,0.7625869761,-4.3373731976\H,3.4270770699,1.6552  
135951,-4.9111173546\H,2.9628914218,-0.0612257286,-5.0588506266\H,2.14  
86625496,0.9774402945,-3.8532356125\C,5.5272922029,0.0289896532,-3.958  
7052739\H,5.4028798789,-0.790134282,-4.6907347959\H,5.9406492896,0.902  
0302981,-4.4967435421\H,6.2732502168,-0.292595744,-3.2095302815\C,-6.8  
404957332,-0.139466839,0.3499577563\H,-6.8341583501,0.9229304537,0.039  
831883\C,-3.1741808643,-0.6868002963,-3.1121636215\H,-2.0784252587,-0.  
8166707854,-3.084392636\C,-2.7418613992,-2.987516452,1.4672529704\H,-1  
.870694119,-3.4121874118,0.9401968751\C,-7.9410715965,-0.8457795951,-0  
.4746603392\H,-8.930896571,-0.3970825711,-0.271157656\H,-7.7464056635,  
-0.7653378632,-1.5585537043\H,-7.9910449579,-1.919965619,-0.2168844416  
\C,-7.1783493575,-0.1932555868,1.8476197247\H,-7.3183378135,-1.2337975  
295,2.1942619478\H,-6.3870001892,0.2660778014,2.4647553498\H,-8.120586  
815,0.3490400422,2.043492503\C,-2.1993914699,-2.156800253,2.6483128681  
\H,-1.5646581312,-1.3341069547,2.2823181844\H,-3.0241326815,-1.7210365  
641,3.2409190166\H,-1.5904226295,-2.7851144972,3.324121065\C,-3.597055  
7649,-4.1726668376,1.9565860906\H,-3.9686089879,-4.7733741981,1.106890  
3949\H,-2.9994746755,-4.8357690617,2.6086827772\H,-4.4717408978,-3.831  
2968067,2.5400766532\C,-3.7601642664,-1.7032761068,-4.1165895721\H,-3.  
5283402783,-2.7427788138,-3.8277015602\H,-4.8606507766,-1.6058986249,-  
4.1734106093\H,-3.3487203669,-1.5315816903,-5.1286145149\C,-3.43994353  
45,0.753333085,-3.5856317862\H,-2.9354665866,0.9256934536,-4.553726694

2\H,-4.5171819861,0.951234292,-3.7349290058\H,-3.0373487297,1.47983130  
91,-2.8634090346\C,2.9604818491,3.0299155662,2.1204810812\H,3.35810668  
65,4.0609374514,2.0838975672\H,2.0395419844,2.9820444264,1.515768442\H  
,2.697895053,2.8104470966,3.1708388456\H,3.5223113537,1.0098597209,1.7  
13837147\F,-5.8621934145,2.8989547638,-1.939532156\F,-7.0857717515,3.7  
635348183,-0.3537389797\F,-5.5084667264,4.9473038067,-1.2911209528\O,3  
.7004751248,-0.3457541332,5.5093646092\C,4.6239385374,-1.3022289938,4.  
9679632687\H,5.4359884104,-1.3823601873,5.7053881487\H,4.1447119249,-2  
.2891003221,4.8367158234\H,5.0325141934,-0.95506277,4.0020879786\Vers  
ion=ES64L-G09RevD.01\State=1-A\HF=-3628.1121393\RMSD=2.648e-09\RMSF=4.  
388e-06\Dipole=-0.390995,-0.8231373,6.0545823\Quadrupole=4.2483376,-9.  
3626359,5.1142984,-9.5145022,-11.5930505,10.6870093\PG=C01 [X(C66H71F3  
N1O5P1)]\@

E-3a/1c (Type II; conf2)

1\1\GINC-WORKER1\FOpt\RTPSSTPSS\def2SVP/W06\C66H71F3N1O5P1\JHIOE\09-Ma  
r-2016\0\#p tpsstps\def2svp/w06 densityfit empiricaldispersion=gd3 o  
pt scrf=(smd,solvent=ch2cl2,read)\title\0,1\p,-0.1755346135,-0.64299  
52102,-0.9236851798\O,-1.5654560728,-0.0120965783,-1.6160669517\O,0.41  
46370486,0.7489530866,-0.1531722101\O,0.6863051822,-1.1106573894,-2.05  
72885178\O,-0.5455073661,-1.5295504647,0.2670422921\C,-2.0595127054,2.  
0533303902,-0.5219848401\C,-2.4245325504,0.7449134944,-0.8465521841\C,  
-3.6820016157,0.1683552954,-0.4828852105\C,-4.559323788,0.95008833,0.2  
576453854\H,-5.5409666901,0.5475800867,0.5275121514\C,-4.2044560389,2.  
2524143741,0.713843763\C,-2.9267861264,2.8111604004,0.3451468028\C,-2.  
5574074977,4.0758747375,0.8945437903\H,-1.5746941205,4.4937690026,0.65  
72543751\C,-3.4146736002,4.7673941386,1.7382530935\H,-3.1033430633,5.7  
302989431,2.1578196284\C,-4.6902294365,4.2349269715,2.0669426677\H,-5.  
361391116,4.7938182167,2.7280580527\C,-5.0733772535,3.0009956651,1.564  
2470126\H,-6.0462864816,2.5705734312,1.8269687891\C,-0.7874687523,2.61  
75484725,-1.0566476616\C,0.4234680408,1.9572588523,-0.8214566481\C,1.6  
919259021,2.5279066226,-1.1553864127\C,1.7044833745,3.7422068019,-1.82  
79220328\H,2.6635801206,4.21374092,-2.0661578893\C,0.500845101,4.39749  
85343,-2.2183278233\C,-0.7687980865,3.8343815898,-1.8298783731\C,-1.95  
99603544,4.4918221009,-2.2641222452\H,-2.9317764637,4.059475165,-2.009  
1120278\C,-1.9012550672,5.6560000802,-3.0161001376\H,-2.8291801588,6.1  
362283665,-3.3457409905\C,-0.6490011829,6.2250391156,-3.3715957971\H,-  
0.6164646699,7.1466612841,-3.9629644646\C,0.5267142636,5.6042757303,-2  
.9799875963\H,1.4993321021,6.02426453,-3.2607522019\C,4.4966292375,-3.  
4183033082,0.0456581628\C,5.0316244173,-2.868819941,1.219876845\H,6.10  
83499268,-2.8979562168,1.4020039615\C,4.1842772841,-2.2709489622,2.156  
495048\H,4.6298404134,-1.8335827883,3.0521821239\C,2.7865647515,-2.212  
5604942,1.9396670431\C,2.2633309049,-2.8076872657,0.7637598989\H,1.188  
4496141,-2.8097169761,0.5665189192\C,3.1089075929,-3.390560479,-0.1782  
914425\H,2.6851333831,-3.8266827954,-1.0873132957\C,1.9089054733,-1.55  
48429824,2.9310694292\C,2.4448561685,-1.1812816388,4.2787998327\H,1.78  
70174181,-0.4666238818,4.7922575939\H,3.4427802343,-0.7289265127,4.171  
6606893\H,2.5580068556,-2.0820160283,4.9091017868\N,0.6647389972,-1.27  
66809731,2.6001479167\H,0.3165212142,-1.413266652,1.5888077664\C,-0.37  
1729373,-0.73085613,3.4095128552\C,-1.1844692147,0.2626067744,2.831463  
5671\H,-0.9643015561,0.621797484,1.822945065\C,-2.2714089859,0.7870288  
035,3.5344186964\H,-2.8849247552,1.5564549213,3.0614341776\C,-2.573933  
5175,0.2972498569,4.8235286184\C,-1.7597370478,-0.7066996776,5.3989612  
248\H,-2.0191921958,-1.0902036466,6.3902558373\C,-0.6681424776,-1.2182  
108175,4.7009302912\H,-0.0773117168,-2.0276264064,5.137787827\C,2.9703  
372307,1.890922223,-0.6943022613\C,3.7572544126,1.1075202524,-1.575023

4853\C,3.4137971173,2.1294152618,0.6351810312\C,5.0022083853,0.6210443  
264,-1.1273491657\C,4.6492213794,1.5990142071,1.0437144236\C,5.4758878  
616,0.8624415632,0.1728430819\H,5.608300837,0.0307642927,-1.8198806805  
\H,4.988938588,1.7784908782,2.0716555708\C,-4.0305446365,-1.226832163,  
-0.9037635353\C,-4.1590969133,-2.2545035953,0.0713049703\C,-4.24605677  
98,-1.5246280068,-2.2787270794\C,-4.5382341234,-3.5445440161,-0.347098  
6242\C,-4.6106854871,-2.8322212225,-2.6442635528\C,-4.7684213127,-3.85  
81889229,-1.6958604436\H,-4.6432784081,-4.3384749378,0.402345438\H,-4.  
7758002649,-3.0565173763,-3.7046611261\C,5.3953121495,-4.0223565223,-1  
.0050945239\C,-4.1151504416,-0.4654442163,-3.3757883139\H,-3.800466967  
6,0.4801226863,-2.903571881\C,-3.8678119767,-2.0076017155,1.552618597\  
C,-5.1493179646,-5.2746909245,-2.1177320427\H,-5.2427406799,-5.8733350  
382,-1.1920999791\C,-5.1601320955,-1.9373170198,2.3919581932\H,-4.9212  
048906,-1.7117988964,3.4478898076\H,-5.8445236126,-1.1537822867,2.0223  
298885\H,-5.7041593226,-2.9000991268,2.366107253\C,-4.0431655545,-5.91  
71095257,-2.9809167417\H,-3.9061582837,-5.3637448294,-3.9283449772\H,-  
3.0753115524,-5.922290463,-2.4484642416\H,-4.3020266374,-6.961698879,-  
3.2343785011\C,-6.5105814183,-5.3136505043,-2.8411232319\H,-6.79445872  
44,-6.3549230756,-3.0805430368\H,-7.3091111369,-4.8760915085,-2.215407  
2713\H,-6.4750303404,-4.7491826816,-3.791089217\C,-3.0298252316,-0.846  
6315692,-4.4033051423\H,-3.3024106455,-1.7640008006,-4.9570955591\H,-2  
.8988197402,-0.0354702619,-5.1432768117\H,-2.0617025448,-1.0143259812,  
-3.9025862646\C,-5.4717257202,-0.1965613976,-4.060523067\H,-5.37186480  
8,0.6051099732,-4.8152676818\H,-5.850563963,-1.0989356548,-4.574772063  
2\H,-6.2336073737,0.1203060257,-3.3256191532\C,6.8448978418,0.38507488  
37,0.6649502416\H,6.6664437673,-0.1618800646,1.6126313076\C,3.29166095  
38,0.8099158632,-3.001075076\H,2.196603033,0.9468995956,-3.0192534843\  
C,2.595063645,2.9753086463,1.6131662783\H,1.662564383,3.2699408571,1.1  
026660184\C,7.5662551853,-0.5689351128,-0.298668955\H,8.4906904731,-0  
.9514678067,0.1694848683\H,6.9433473258,-1.4358115153,-0.5722077379\H,  
7.8563605484,-0.0528468591,-1.2325011659\C,7.7534947769,1.5913299077,0  
.9964020566\H,7.965365045,2.1796607276,0.0843448977\H,7.2848210914,2.2  
670053017,1.7331124409\H,8.7182858765,1.2495151812,1.413982879\C,2.190  
469517,2.1744821749,2.8648601358\H,1.6476829252,1.2611798836,2.5754148  
288\H,3.0717156278,1.8798444941,3.462583262\H,1.5281180234,2.775002860  
2,3.5147867053\C,3.3372976503,4.2752542862,1.9845495854\H,3.5716594367  
,4.8697846194,1.083196652\H,2.717115854,4.8987818438,2.6546428569\H,4.  
288381704,4.0611714953,2.5060683878\C,3.9179819738,1.8010521046,-4.005  
049685\H,3.6640442015,2.8459207033,-3.7555756638\H,5.0206311267,1.7122  
845145,-4.0077463647\H,3.5571446149,1.5978639418,-5.0304333959\C,3.566  
0129389,-0.6454880969,-3.4239691025\H,3.081003987,-0.8505761345,-4.395  
6607569\H,4.6460964678,-0.8454991877,-3.5453912071\H,3.1511596879,-1.3  
488656517,-2.6851564153\C,-2.8944403045,-3.0496997334,2.1379047317\H,-  
3.3381351691,-4.0618885152,2.1640683797\H,-1.9668687922,-3.0827916247,  
1.5438686319\H,-2.6324789714,-2.7751634339,3.1755274346\H,-3.367075738  
6,-1.0292439403,1.6279419783\F,5.4758213898,-3.2289028584,-2.110723343  
6\F,6.663094896,-4.2080903251,-0.5646056329\F,4.9372195545,-5.22648331  
82,-1.4323174663\O,-3.6247886511,0.7120023022,5.5701798381\C,-4.520388  
8882,1.6860316416,5.0139330376\H,-5.2864815032,1.8592534694,5.78399410  
05\H,-3.9959327591,2.6333998002,4.7937161256\H,-4.9998554643,1.3033831  
55,4.0948882876\Version=ES64L-G09RevD.01\State=1-A\HF=-3628.1113715\R  
MSD=2.623e-09\RMSF=1.761e-06\Dipole=0.3336435,0.9248397,6.0091727\Quad  
rupole=3.7504129,-9.3538175,5.6034046,-8.4790977,11.6867968,-9.8006149  
\PG=C01 [X(C66H71F3N1O5P1)]\@

Z-configuration

Z-3a/1c (Type II; conf0)

1\1\GINC-WORKER1\FOpt\RTPSSTPSS\def2SVP\W06\C66H71F3N1O5P1\JHIOE\11-Ma  
r-2016\0\#p tpsstps\def2svp\w06 densityfit empiricdispersion=gd3 o  
pt scrf=(smd,solvent=ch2cl2,read)\title\0,1P,-1.2630911183,0.567701  
2541,-1.8033445787\O,-2.7023359326,0.9970794953,-1.0604307693\O,-0.148  
5834316,1.1337575412,-0.6475686008\O,-1.2212442272,1.3231720774,-3.096  
721807\O,-1.0727597708,-0.9470157563,-1.7188908053\C,-2.2231217179,1.5  
579332197,1.2039940447\C,-2.8715119065,0.734354222,0.2830862715\C,-3.7  
575008637,-0.3221491633,0.6615229173\C,-3.958433307,-0.5371612206,2.01  
88319216\H,-4.6559540058,-1.3159481957,2.343585794\C,-3.2577200931,0.2  
080118024,3.0108365986\C,-2.3531587699,1.2566172766,2.6070939301\C,-1.  
5887896341,1.9167880896,3.6159988694\H,-0.8666301162,2.6841621902,3.32  
25008114\C,-1.733307062,1.5837392053,4.9552085955\H,-1.1267595193,2.09  
59334569,5.7101261264\C,-2.6572157108,0.5812637425,5.3553483307\H,-2.7  
655029311,0.3308899019,6.41617476\C,-3.4008488187,-0.0930123806,4.3990  
981936\H,-4.0982596344,-0.8857564209,4.6922967086\C,-1.3706622545,2.68  
05324186,0.719538488\C,-0.293839988,2.4070667281,-0.1307348673\C,0.731  
82194,3.3706275644,-0.3963922901\C,0.5283436477,4.6742853189,0.0370019  
094\H,1.3055823783,5.4254594788,-0.1403315849\C,-0.6442290575,5.055373  
6158,0.7526324385\C,-1.5984814083,4.0421513809,1.1292617513\C,-2.75453  
54716,4.4390945441,1.867090538\H,-3.5013032876,3.6850886703,2.13402618  
85\C,-2.9506788761,5.7640536361,2.2282942103\H,-3.8498357045,6.0471491  
228,2.7865525526\C,-1.9998344467,6.7581236583,1.8729420283\H,-2.165183  
3899,7.8004879198,2.1666985563\C,-0.8718300946,6.4080152129,1.14693225  
64\H,-0.1355822008,7.167364765,0.8597017357\C,6.0515384041,-2.93533806  
09,0.041582121\C,5.2188347483,-2.0834692236,0.7890785918\H,5.590879898  
1,-1.6064415393,1.7003712623\C,3.9178751116,-1.8340080194,0.35442207\H  
,3.2797705942,-1.1526729152,0.9198964492\C,3.4364213728,-2.4212017371,  
-0.8374327724\C,4.286524816,-3.2600101746,-1.5879652733\H,3.9324577161  
,-3.7197854537,-2.5146207053\C,5.5856022025,-3.5269203278,-1.142154864  
7\H,6.2380525467,-4.1868978216,-1.7200620397\C,2.0919101545,-2.0620645  
778,-1.3435290967\C,1.932839383,-1.7357475692,-2.7962850081\H,0.908774  
5814,-1.4038628577,-3.0204183576\H,2.1627908474,-2.6334424873,-3.39955  
00539\H,2.6614084939,-0.9572624619,-3.0823589271\N,1.0394719657,-1.957  
1816986,-0.5707285621\H,0.1525410138,-1.5279944122,-1.0355617612\C,0.8  
588075799,-2.3286948956,0.7911682541\C,0.028660411,-1.515417545,1.5822  
199373\H,-0.4175507343,-0.6150348626,1.1515358083\C,-0.2174617923,-1.8  
40897389,2.9199288436\H,-0.8529877989,-1.1833654409,3.5168219235\C,0.3  
461408541,-3.0122326763,3.4688928107\C,1.1542881947,-3.8459818271,2.65  
79475627\H,1.5600499272,-4.7654328199,3.0907074204\C,1.4109620279,-3.5  
095263409,1.3324535405\H,2.0184205527,-4.1723896122,0.7105963208\C,2.0  
626432217,2.9160046606,-0.924319174\C,2.3322852848,2.8330508486,-2.313  
8058877\C,3.0622100644,2.5530996445,0.0242967605\C,3.5951968043,2.3707  
271932,-2.7307871623\C,4.3039767578,2.0848853055,-0.4445228056\C,4.591  
4763019,1.9835225875,-1.8177316097\H,3.8187142444,2.3136305426,-3.8021  
191006\H,5.0699273888,1.7943690274,0.2831662744\C,-4.4619360168,-1.140  
2435106,-0.3780684505\C,-4.110218809,-2.5053652491,-0.5775130577\C,-5.  
5017175831,-0.5553409112,-1.1483044627\C,-4.8379380457,-3.2626628312,-  
1.5127246475\C,-6.1930220267,-1.3550630701,-2.0786374358\C,-5.88595272  
64,-2.7112196293,-2.2714521561\H,-4.5715661351,-4.3154447337,-1.660181  
1428\H,-7.0021014911,-0.908203197,-2.6696901181\C,7.4818514892,-3.1330  
658054,0.4754747716\C,-5.9088190795,0.9097342816,-0.9824029492\H,-5.24  
20276494,1.3649989289,-0.2308372392\C,-2.9578579637,-3.1619740543,0.18  
57837517\C,-6.6620514678,-3.5556883337,-3.2789692297\H,-7.4213254879,-  
2.8948068757,-3.7377322502\C,-3.473261291,-4.0622545277,1.3279018758\H  
,-2.6269754875,-4.487697483,1.8984251747\H,-4.1118175965,-3.5014150332  
,2.0319422239\H,-4.0702786195,-4.9028694477,0.9274376979\C,-7.40638150

7,-4.7170934771,-2.5880845997\H,-6.6968040656,-5.4237697003,-2.1192234  
102\H,-8.0842391909,-4.3441573422,-1.7994142017\H,-8.0109092954,-5.284  
0778444,-3.3196758722\C,-5.7502678233,-4.0763231957,-4.4091777048\H,-6  
.3399616922,-4.6348237338,-5.1592706578\H,-5.2385485836,-3.2445127678,  
-4.9253079488\H,-4.9751510465,-4.7590862861,-4.0146377852\C,-5.7260977  
642,1.7023736991,-2.2928136653\H,-6.4015725944,1.3339792118,-3.0869834  
691\H,-5.9535579199,2.7720312451,-2.1298773134\H,-4.6865344399,1.62349  
93892,-2.6535952184\C,-7.347614853,1.0334313483,-0.4391473872\H,-7.605  
4899202,2.0940067493,-0.2627822656\H,-8.0858219394,0.6205904956,-1.151  
1109544\H,-7.4579249737,0.4909472642,0.5171764146\C,5.9620530784,1.529  
9864841,-2.3152649088\H,5.8784198569,1.3980123912,-3.4107493887\C,1.29  
77173199,3.3097870477,-3.3316242928\H,0.3026552325,3.1470257558,-2.883  
9033563\C,2.8017456806,2.6439910613,1.5322906515\H,1.9290448698,3.3017  
945919,1.6747136271\C,7.0250463988,2.6196524506,-2.0571626812\H,8.0056  
36458,2.3141414561,-2.4666102942\H,6.738937326,3.5772580969,-2.5278239  
202\H,7.1508498791,2.798328314,-0.9731218804\C,6.3995487275,0.18210363  
25,-1.7119820127\H,6.555649534,0.2570076277,-0.6213319621\H,5.64483610  
33,-0.6026195223,-1.8931273121\H,7.3536007077,-0.1522965686,-2.1578936  
174\C,2.4233571691,1.269774455,2.1213461689\H,1.6234079446,0.793492157  
4,1.5318793682\H,3.2961177453,0.5920793088,2.1336398355\H,2.0649082048  
,1.3739287264,3.161769578\C,3.9712531477,3.2769832382,2.3085130861\H,4  
.2378054327,4.2670488172,1.8969613229\H,3.6928522888,3.4117381833,3.36  
96187064\H,4.8764032721,2.6430098741,2.2845774054\C,1.4660215985,4.822  
9553923,-3.5911976482\H,1.3798090039,5.4025175072,-2.6554402414\H,2.45  
59979924,5.0393115619,-4.0348661161\H,0.6902513407,5.1872699236,-4.289  
9585751\C,1.3196601399,2.5219606964,-4.6521430602\H,0.4650744816,2.824  
1629478,-5.2828716613\H,2.2415153015,2.7085161421,-5.2337654362\H,1.23  
00596642,1.4380114825,-4.4703434997\C,-2.0107309936,-3.950574118,-0.74  
06058796\H,-2.4990691737,-4.8480313465,-1.162752421\H,-1.661578062,-3.  
3147739939,-1.5698385266\H,-1.1278608795,-4.2934151238,-0.1715880028\H  
, -2.3641217822,-2.3506307811,0.6379257745\F,8.2626768389,-2.0769194167  
,0.1062526116\F,7.5977576054,-3.2418967304,1.8230029676\F,8.0421772177  
, -4.2395340723,-0.068604321\O,0.159986611,-3.4258936035,4.7445788293\C  
, -0.6898394033,-2.650004361,5.6022021977\H,-0.7070263875,-3.1821897417  
,6.5647052881\H,-0.2863869998,-1.6314539615,5.7487487394\H,-1.71513024  
99,-2.5882809902,5.1943635286\\Version=ES64L-G09RevD.01\State=1-A\HF=-  
3628.1063991\RMSD=3.937e-09\RMSF=3.401e-06\Dipole=2.5556649,-2.7916436  
,3.0216288\Quadrupole=-12.9997273,4.831555,8.1681723,-2.043609,-22.550  
9303,14.9006244\PG=C01 [X(C66H71F3N1O5P1)]\@

Z-3a/1c (Type II; conf1)

1\1\GINC-WORKER0\FOpt\RTSPSTPSS\def2SVP/W06\C66H71F3N1O5P1\JHIOE\14-Ma  
r-2016\0\#p tpsstps/def2svp/w06 densityfit empiricdispersion=gd3 o  
pt scrf=(smd,solvent=ch2cl2,read)\title\0,1\P,-1.2538833204,0.568719  
8245,-1.7916268253\O,-2.6945460221,0.9927058692,-1.0485370258\O,-0.141  
5872546,1.130127548,-0.6320716133\O,-1.2119643995,1.3308460519,-3.0810  
88145\O,-1.0619760988,-0.9462475992,-1.7143317796\C,-2.22032829,1.5475  
699441,1.2196801969\C,-2.8683330227,0.7288620476,0.2940255088\C,-3.759  
1607969,-0.3257355497,0.6661230704\C,-3.9616243325,-0.5480454619,2.021  
8326659\H,-4.6610013062,-1.3271476356,2.341371259\C,-3.2595163815,0.18  
95447472,3.0183665278\C,-2.3544859103,1.2403561825,2.6213633787\C,-1.5  
918026284,1.8953216318,3.6349108935\H,-0.8718108257,2.6667583588,3.346  
7430824\C,-1.734960856,1.551576535,4.9716310738\H,-1.1289292556,2.0590  
929385,5.7300930148\C,-2.6563287637,0.5439631237,5.3648482952\H,-2.761  
99235,0.2842204011,6.4236818659\C,-3.401163893,-0.1226263482,4.4042139

337\H,-4.09786299,-0.9181348069,4.6917076148\C,-1.3650540122,2.6710625  
055,0.7413712524\C,-0.2887877278,2.4013721627,-0.1106722408\C,0.734780  
3624,3.3673671197,-0.3760956823\C,0.5303488099,4.6696713234,0.06045021  
24\H,1.3054727168,5.4227935976,-0.1177282988\C,-0.6427962094,5.0476505  
645,0.7767582603\C,-1.5948460965,4.031988955,1.1529352082\C,-2.7530551  
085,4.4270697693,1.8882441888\H,-3.4982198775,3.6714868125,2.154941238  
4\C,-2.9540764373,5.7521944247,2.2461317393\H,-3.8556208186,6.03377997  
57,2.8013143905\C,-2.0055307925,6.7485627444,1.8909558345\H,-2.1749854  
077,7.7910310042,2.1818409275\C,-0.8745053928,6.4000403499,1.168935881  
7\H,-0.1398159481,7.1610760815,0.8822010031\C,6.0619702777,-2.93916991  
76,0.0406307256\C,5.2287850301,-2.0893653727,0.7895356376\H,5.60071110  
8,-1.6145753336,1.7019548778\C,3.9270012924,-1.8408883924,0.3561507543  
\H,3.2879193078,-1.1638630393,0.9256666069\C,3.4464366631,-2.424656933  
4,-0.8374412169\C,4.2968088612,-3.2622939485,-1.5892246286\H,3.9422440  
272,-3.7205763262,-2.5163118678\C,5.5957710058,-3.5298167376,-1.143790  
2558\H,6.2480425299,-4.1890834312,-1.7228498812\C,2.1023713606,-2.0625  
093632,-1.3429922342\C,1.9457331264,-1.7206313797,-2.7930767179\H,0.91  
79803252,-1.4009163865,-3.0180727193\H,2.1935332086,-2.605282358,-3.40  
81776863\H,2.6621743321,-0.9254902128,-3.0643149958\N,1.0484421601,-1.  
9629691885,-0.5714303394\H,0.1628632649,-1.5304526591,-1.03561248\C,0.  
8622874285,-2.339550201,0.7882768688\C,0.0220673451,-1.5318765961,1.57  
48723049\H,-0.4293543394,-0.6348155671,1.1421830184\C,-0.2281976215,-1.  
.8589360013,2.9112151521\H,-0.871434085,-1.2063041882,3.5049841653\C,0.  
.3409179834,-3.0258889046,3.4637900101\C,1.1568085705,-3.855703742,2.6  
566736013\H,1.5662211272,-4.7726186025,3.0912853655\C,1.4178424704,-3.  
5174519415,1.3323808514\H,2.0315035659,-4.1769238813,0.7131055426\C,2.  
062593314,2.9161136436,-0.913528095\C,2.3261205459,2.8492553462,-2.304  
8616395\C,3.0662741124,2.5433925298,0.0267252292\C,3.585141512,2.38599  
26286,-2.7325375684\C,4.3043330934,2.0756373126,-0.4524861703\C,4.5839  
027518,1.9849473037,-1.8280435971\H,3.8035182297,2.339141094,-3.805404  
2292\H,5.0734768647,1.7781841529,0.268897242\C,-4.4659835443,-1.134229  
451,-0.3790827226\C,-4.1225686928,-2.4981169543,-0.5865445155\C,-5.500  
5116387,-0.5366307287,-1.1502535977\C,-4.8510935658,-3.243102499,-1.53  
43708383\C,-6.1914266246,-1.3220157583,-2.0895160129\C,-5.8888844626,-  
2.6797591808,-2.2943339825\H,-4.5958364227,-4.2974381687,-1.6955647659  
\H,-6.9927536225,-0.8583244871,-2.6769354869\C,7.4937156568,-3.1356943  
714,0.4703101677\C,-5.8993793207,0.9302327705,-0.9775744887\H,-5.23597  
58485,1.3778914389,-0.218530765\C,-2.9759446199,-3.1660097849,0.175508  
6942\C,-6.6578573603,-3.5160625401,-3.3138032881\H,-6.2064697887,-4.52  
62201556,-3.3113340478\C,-3.49626778,-4.077074956,1.3066154806\H,-2.65  
15612204,-4.5092750126,1.874471641\H,-4.1346894633,-3.5225362719,2.015  
8886897\H,-4.0936768205,-4.9130703419,0.8970841617\C,-6.5203397912,-2.  
9452914152,-4.7402857996\H,-6.9812794985,-1.9434885969,-4.817601797\H,  
-5.4590381603,-2.8536880547,-5.0327282469\H,-7.0235041093,-3.602493165  
4,-5.4731831983\C,-8.1412426395,-3.6650119389,-2.9168626809\H,-8.67479  
19136,-4.3135427604,-3.6359204159\H,-8.242713124,-4.1121149021,-1.9116  
917425\H,-8.6505921477,-2.6837551258,-2.9051831211\C,-5.7015931275,1.7  
275163719,-2.2831020184\H,-6.3712568507,1.3646648511,-3.0847554206\H,-  
5.9263060057,2.7974616931,-2.118087543\H,-4.6592309378,1.6455961286,-2.  
.6348545828\C,-7.3419393628,1.0598180576,-0.4462363449\H,-7.5974042021  
,2.1214509387,-0.273132772\H,-8.0754672743,0.6486716054,-1.163975771\H  
,-7.4627770808,0.5190031845,0.5097797509\C,5.9481361402,1.5248474179,-  
2.3375143597\H,5.852540374,1.3879497122,-3.4314075928\C,1.2900932493,3.  
.3432539281,-3.3127957387\H,0.2961279483,3.1880718968,-2.8597433676\C,  
2.8129331865,2.6249765636,1.536224251\H,1.945777979,3.2883401509,1.686  
8736631\C,7.017392605,2.6121434227,-2.095881081\H,7.9928203976,2.30043

45958,-2.5129096097\H,6.7305410559,3.5681882436,-2.569175927\H,7.15415  
83703,2.7966027735,-1.0141500632\C,6.3875379309,0.1786334047,-1.732033  
2556\H,6.5568112763,0.2593731925,-0.6437906859\H,5.6279880215,-0.60465  
13131,-1.8993697689\H,7.3348360638,-0.1617441979,-2.1875065345\C,2.426  
3278218,1.2499130127,2.1177827038\H,1.6240982647,0.7809128147,1.525560  
0784\H,3.2953237756,0.5675466506,2.1265289637\H,2.0681784019,1.3507008  
755,3.1586314131\C,3.9907478575,3.2432613735,2.3114162655\H,4.25963472  
52,4.2362513995,1.9084909562\H,3.7202214036,3.3675261306,3.3758097152\  
H,4.8921016727,2.6046570022,2.2739436208\C,1.4726666489,4.8562789383,-  
3.5641856069\H,1.3977979786,5.4313131218,-2.624612112\H,2.462299629,5.  
0651466279,-4.0121925189\H,0.696804239,5.232485496,-4.2565309456\C,1.2  
953973314,2.5637144903,-4.638258433\H,0.4420310392,2.8820858378,-5.262  
7019861\H,2.2170126027,2.7412292927,-5.2231574311\H,1.1906930065,1.480  
3409518,-4.4617653973\C,-2.0241132679,-3.9457105139,-0.7535226072\H,-2  
.5131121232,-4.8329787046,-1.1959075587\H,-1.6617941565,-3.298054039,-  
1.5678594366\H,-1.149926025,-4.3033478093,-0.1800811908\H,-2.383655790  
4,-2.3597822025,0.6388089811\F,8.2820440117,-2.1019186225,0.0563648821  
\F,7.6203767101,-3.1977877128,1.8195809783\F,8.0379267884,-4.266748239  
, -0.0390163359\O,0.1523814876,-3.4375451076,4.7398634952\C,-0.69353523  
89,-2.6540257014,5.594544493\H,-0.7101218078,-3.1793754586,6.560801577  
\H,-0.2864167387,-1.6358218602,5.7331980865\H,-1.7194062134,-2.5917513  
235,5.1883938434\\Version=ES64L-G09RevD.01\State=1-A\HF=-3628.1063934\  
RMSD=7.263e-09\RMSF=2.945e-06\Dipole=2.5391976,-2.7670666,3.0014232\Qu  
adropole=-12.9666813,4.8442904,8.1223909,-2.4760274,-22.2071978,14.496  
1097\PG=C01 [X(C66H71F3N1O5P1)]\@

Z-3a/1c (Type II; conf2)

1\1\GINC-WORKER1\FOpt\RTPSSTPSS\def2SVP/W06\C66H71F3N1O5P1\JHIOE\02-Au  
g-2016\0\#p tpsstps/def2svp/w06 densityfit empiricaldispersion=gd3 o  
pt scrf=(smd,solvent=ch2cl2,read)\title\0,1\p,-0.7140326512,0.714272  
8144,-1.7000306899\O,-2.0128917543,1.4566812,-0.9487833389\O,0.4546006  
709,0.8670589397,-0.4770971697\O,-0.4167797499,1.5268121085,-2.9231698  
98\O,-0.9262187331,-0.800369639,-1.740208916\C,-1.5373174541,1.6210610  
415,1.3824563071\C,-2.3256424458,1.1098528415,0.3495311083\C,-3.478355  
5866,0.2924345165,0.5694726975\C,-3.8173604732,-0.0002661135,1.8837929  
096\H,-4.7125496733,-0.5959594359,2.0889045396\C,-3.0100464453,0.41788  
70167,2.9798522137\C,-1.8326899776,1.2143279533,2.7354923699\C,-0.9849  
592903,1.5199321926,3.8429593264\H,-0.065100859,2.0848140814,3.6704887  
406\C,-1.2998943147,1.0947766291,5.1255638453\H,-0.6262282645,1.332404  
2221,5.9561077188\C,-2.4836333943,0.348284043,5.3700118246\H,-2.723501  
8646,0.0225698774,6.3879420145\C,-3.3183479351,0.0155941893,4.31471942  
22\H,-4.220195694,-0.5836203,4.4838524141\C,-0.3785664263,2.5050880972  
,1.0697187703\C,0.6239635992,2.0556605085,0.2016149568\C,1.8953976216,  
2.7062752127,0.0980740348\C,2.0662519699,3.9134398103,0.7606657925\H,3  
.031311896,4.4265778719,0.7025210031\C,1.0205706008,4.5077566763,1.525  
0588733\C,-0.2210183471,3.7951594632,1.6929443008\C,-1.2573071125,4.41  
32634378,2.4564930076\H,-2.2170740287,3.8998990113,2.5663726127\C,-1.0  
697272383,5.6569027562,3.041572226\H,-1.8832696928,6.1149146174,3.6149  
00486\C,0.1645893207,6.3455523249,2.8966860957\H,0.3017340565,7.324788  
649,3.3681827178\C,1.1860800109,5.7808940918,2.1489061284\H,2.13878967  
49,6.3068104133,2.018915728\C,5.6497864537,-4.105278971,0.176997423\C,  
4.9452659972,-3.1542429385,0.9364195728\H,5.3530357972,-2.7928440602,1  
.8848591243\C,3.7262739304,-2.6620835244,0.4692065723\H,3.1836851527,-  
1.9144887956,1.0513425475\C,3.2121788957,-3.097657871,-0.772366346\C,3  
.9270076831,-4.0505501818,-1.5259792207\H,3.5368343064,-4.4023689673,-  
2.4849818473\C,5.1362724333,-4.563961352,-1.045397268\H,5.6866374658,-

5.3070495203,-1.6285734062\C,1.9894027617,-2.4618087735,-1.3185862269\  
C,2.0322330662,-1.9016919699,-2.7062452368\H,1.048591699,-1.5225509291  
,-3.0187096864\H,2.3827995902,-2.6709777157,-3.4157689246\H,2.77131900  
69,-1.0788371257,-2.7314808352\N,0.9030453002,-2.2842842765,-0.6118950  
533\H,0.1319314352,-1.6666178247,-1.0718979213\C,0.5615374561,-2.76638  
56314,0.6825360322\C,-0.2010233744,-1.9167555664,1.5024210457\H,-0.468  
7216427,-0.9192894263,1.1441938295\C,-0.6061788809,-2.3327948336,2.774  
1415269\H,-1.1893284948,-1.6492835575,3.3945273453\C,-0.2683473469,-3.  
6262588521,3.2260118043\C,0.4762864108,-4.4886802397,2.3852215397\H,0.  
7082625398,-5.4971906911,2.740584056\C,0.8907548891,-4.0651208013,1.12  
5639208\H,1.4459671843,-4.7472559912,0.4764404068\C,3.0314817992,2.035  
2347902,-0.6192222594\C,3.2227737544,2.2557656804,-2.0107638606\C,3.92  
2837772,1.1852312205,0.0955980735\C,4.2922910717,1.6149966243,-2.66485  
59835\C,4.9729834356,0.5665325199,-0.6124211724\C,5.1794278417,0.76244  
54031,-1.9876449881\H,4.4450606275,1.7856769556,-3.7361886059\H,5.6522  
945066,-0.0904467198,-0.0555905598\C,-4.2823549919,-0.2273891952,-0.58  
28593361\C,-4.2909336013,-1.6224113525,-0.8720479144\C,-5.0496366364,0  
.6658379238,-1.3772881818\C,-5.0941074789,-2.091233825,-1.9264860974\C  
,-5.8301118778,0.1451542634,-2.4272361113\C,-5.8739964612,-1.227804132  
6,-2.71667843\H,-5.1005878125,-3.16491293,-2.14606356\H,-6.4261873447,  
0.831676225,-3.0415207496\C,7.0115238514,-4.5550983695,0.6416003885\C,  
-5.0745422325,2.1723047056,-1.1146430975\H,-4.3900698885,2.3828857143,  
-0.2756863687\C,-3.4411034629,-2.621878728,-0.0837075534\C,-6.71559988  
88,-1.7578735693,-3.8744246981\H,-7.2667880746,-0.8956081544,-4.294905  
3735\C,-4.2939501234,-3.4395690928,0.9088277697\H,-3.6503227748,-4.106  
674247,1.5123680381\H,-4.8523830335,-2.786592551,1.6017248318\H,-5.029  
0974966,-4.0685919548,0.3726886683\C,-7.7562799159,-2.7955784678,-3.40  
78241491\H,-7.2680889068,-3.6961896067,-2.9919386821\H,-8.4170203747,-  
2.3771897998,-2.6275212419\H,-8.3886657475,-3.1188895237,-4.2549918594  
\C,-5.8223173872,-2.3322075289,-4.9940984828\H,-6.4349222861,-2.656584  
7656,-5.8553757897\H,-5.0980114963,-1.578399417,-5.3509506353\H,-5.250  
5153794,-3.2088025278,-4.6371958243\C,-4.5653466448,2.9693933481,-2.33  
28002389\H,-5.2369562521,2.8501962817,-3.202973122\H,-4.5169779346,4.0  
476977532,-2.0933975792\H,-3.5548383662,2.6356486297,-2.6221613388\C,-  
6.4782995775,2.64172656,-0.6790298544\H,-6.4681529077,3.7199635212,-0.  
4345028471\H,-7.2233369832,2.4852220551,-1.4807449184\H,-6.8219568733,  
2.0911104287,0.2152809972\C,6.3405748618,0.0931445954,-2.7185038613\H,  
6.2269681413,0.3325723557,-3.7926142095\C,2.3286331907,3.2324288424,-2  
.7768847514\H,1.3388380993,3.2210166183,-2.289026189\C,3.9016641758,0.  
9238260433,1.610756852\H,4.5306031536,0.0236701,1.7387511768\C,7.69540  
32541,0.665758582,-2.251734107\H,8.5282831915,0.2134369071,-2.82098191  
34\H,7.7368248078,1.7604321557,-2.3943055053\H,7.8649655549,0.45510561  
94,-1.1796015172\C,6.3094582961,-1.4406829191,-2.5719542065\H,6.464577  
3698,-1.7503623162,-1.5227983349\H,5.3433701821,-1.8544097556,-2.90947  
63876\H,7.1103848212,-1.9058614737,-3.1753581227\C,4.6095320813,2.0578  
031281,2.3852458364\H,5.6187745999,2.2503287204,1.9796463353\H,4.03305  
64406,2.9975446482,2.3316875447\H,4.7143782158,1.7853046034,3.45191912  
63\C,2.5396684238,0.5943331609,2.2528432034\H,1.9350483869,-0.07233884  
62,1.6165766455\H,2.7028999103,0.0839205809,3.2194038217\H,1.945017095  
8,1.4988086402,2.4567010589\C,2.8986846722,4.6653336325,-2.6836756442\  
H,3.0044324379,4.9943304218,-1.6357507093\H,3.8965391572,4.7210672223,  
-3.1576891939\H,2.2334367232,5.3816615592,-3.2002594906\C,2.1019915275  
,2.8393246096,-4.2468829657\H,1.3470864917,3.5077501281,-4.6980974596\  
H,3.0247694856,2.9323517598,-4.8491964951\H,1.7211445881,1.8084361866,  
-4.3253912704\C,-2.6330700908,-3.5598022353,-1.0021812805\H,-3.2879740  
497,-4.2505595506,-1.5646228751\H,-2.0360488074,-2.9758102602,-1.72083



10421\H,-1.9457837447,-4.1782448768,-0.3968816813\H,-2.7115654608,-2.0  
406568423,0.5028837261\O,-0.6204228453,-4.1305785877,4.43272098\C,-1.3  
859349681,-3.3058670759,5.3233254364\H,-1.5530451704,-3.9138066446,6.2  
247100394\H,-0.829899912,-2.3894879355,5.5931637455\H,-2.359024913,-3.  
0320095543,4.8762242491\F,7.9718317904,-3.6450684132,0.3075621883\F,7.  
385645467,-5.7347214837,0.0911747914\F,7.0730039401,-4.6996286777,1.98  
91834893\Version=ES64L-G09RevD.01\State=1-A\HF=-3628.1049564\RMSD=4.3  
91e-09\RMSF=2.936e-06\Dipole=1.8261306,-3.4033799,2.8251093\Quadrupole  
=-10.4721643,1.327355,9.1448092,2.9264306,-20.2472074,16.3945133\PG=C0  
1 [X(C66H71F3N1O5P1)]\@

Z-3a/1c (Type II; conf3)

1\1\GINC-LOGIN\FOpt\RTPSSSTPSS\def2SVP/W06\C66H71F3N1O5P1\JHIOE\14-Mar-  
2016\0\#p tpsstps\def2svp/w06 densityfit empiricaldispersion=gd3 opt  
scrf=(smd,solvent=ch2cl2,read)\title\0,1\P,-1.3483305331,0.54120452  
3,-1.7561538493\O,-2.7754133273,1.0324568298,-1.0334829078\O,-0.221714  
1077,1.0811021074,-0.5970678101\O,-1.2614621364,1.2759358198,-3.059485  
4313\O,-1.2204700427,-0.9788187164,-1.6460930384\C,-2.3080293017,1.561  
5271703,1.2390480824\C,-2.9674143931,0.7609952445,0.3065550758\C,-3.86  
50862026,-0.2930848546,0.6654035737\C,-4.0698985446,-0.5232409713,2.01  
99027803\H,-4.7708274696,-1.3030594229,2.3336890094\C,-3.3601885385,0.  
1970965482,3.0232006019\C,-2.4458472831,1.2447351841,2.6384931199\C,-1  
.6754717615,1.8794552962,3.6593202066\H,-0.9450977479,2.6437334503,3.3  
79152686\C,-1.8205337868,1.5202316089,4.991747714\H,-1.2083326968,2.01  
11649233,5.7561232644\C,-2.7490965909,0.5143247406,5.3727449461\H,-2.8  
546145481,0.2408926827,6.4281417915\C,-3.4998301219,-0.1343686708,4.40  
49427149\H,-4.2006980029,-0.9294756272,4.6833292762\C,-1.4116216689,2.  
6578107956,0.7711656395\C,-0.3282550366,2.349682091,-0.0606116965\C,0.  
7491687182,3.2693394071,-0.2763836117\C,0.5944706254,4.5718480214,0.18  
06119216\H,1.4103140881,5.2888978083,0.0383491416\C,-0.5788975438,4.99  
52607253,0.8693486216\C,-1.5896417511,4.0211346753,1.198714206\C,-2.74  
56295639,4.457929781,1.9137736301\H,-3.5322770175,3.7339931166,2.14749  
49473\C,-2.8903653483,5.7841566415,2.2944352877\H,-3.7905063458,6.0994  
898294,2.833541631\C,-1.8850267888,6.7392146516,1.9839680716\H,-2.0101  
673954,7.7826660111,2.2933494485\C,-0.7540009983,6.3495888135,1.283600  
5144\H,0.02516905,7.07853273,1.0329107639\C,6.0790821679,-2.517855102,  
-0.4589552133\C,5.2647027024,-1.6109778508,0.2421317612\H,5.6926893016  
, -0.9634851916,1.0128312622\C,3.9065535366,-1.5240336628,-0.0625479105  
\H,3.2788187727,-0.7994684243,0.4595758398\C,3.350798698,-2.3304784269  
, -1.0800544791\C,4.1759595173,-3.2348322938,-1.7795858375\H,3.75861350  
5,-3.8648157223,-2.5703642371\C,5.5343996255,-3.3379215887,-1.45969992  
71\H,6.1714975005,-4.0428754952,-2.0006734839\C,1.9458147946,-2.101061  
8125,-1.487550368\C,1.6552679687,-1.8833207205,-2.9403518562\H,0.60036  
42093,-1.6197921615,-3.1041080133\H,1.8951246488,-2.8065264739,-3.4999  
528041\H,2.3139316095,-1.0888718984,-3.3327966748\N,0.9564595176,-1.99  
54458565,-0.6354409289\H,0.0290607873,-1.6042908462,-1.0481256302\C,0.  
8979072629,-2.2693560399,0.7574681125\C,-0.0167609597,-1.5198574926,1.  
5198801308\H,-0.6111544539,-0.7414641633,1.0351450169\C,-0.1527136899,  
-1.7429046284,2.8929389487\H,-0.8590385315,-1.1329137796,3.4602637642\  
C,0.6203899239,-2.7456358378,3.5158962648\C,1.513809444,-3.5235124216,  
2.7387762911\H,2.0829876283,-4.3177120268,3.2313351586\C,1.6537929374,  
-3.2907239306,1.3741271288\H,2.3311167374,-3.9141314161,0.7850992804\C  
,2.0752061522,2.7774882407,-0.7826181023\C,2.3555082004,2.6729919095,-  
2.1701829508\C,3.0662843979,2.4225102262,0.178023031\C,3.6089871646,2.  
1790979809,-2.5769806657\C,4.303739796,1.9349129598,-0.2826397167\C,4.  
5948552421,1.7955878681,-1.6500876976\H,3.824575581,2.0998245362,-3.64

76737783\H,5.0703991086,1.645688534,0.4442443834\C,-4.540396906,-1.116  
0657983,-0.3884671662\C,-4.2113573062,-2.4951466895,-0.5345648877\C,-5  
.5123220623,-0.526624988,-1.2408276324\C,-4.8887110781,-3.2557367886,-  
1.5036085724\C,-6.1521602095,-1.3306570295,-2.2035790025\C,-5.86285018  
44,-2.6963852524,-2.3498166321\H,-4.6365167962,-4.3169868418,-1.610722  
0467\H,-6.9061892184,-0.8791415522,-2.8602790693\C,7.5625083788,-2.530  
6676965,-0.1901359119\C,-5.9103071792,0.9459187602,-1.1272244798\H,-5.  
2834922364,1.4081044333,-0.3463316963\C,-3.1273713535,-3.1670842796,0.  
3116724955\C,-6.5755858996,-3.5406258188,-3.4022553569\H,-7.266943564,  
-2.8669311945,-3.9425991657\C,-3.735517668,-4.0522894437,1.4197811519\  
H,-2.9373017732,-4.476514209,2.0568906493\H,-4.4222969758,-3.481214899  
8,2.0679988149\H,-4.306418633,-4.8934685528,0.983975084\C,-7.420368686  
5,-4.6584264215,-2.7570897277\H,-6.7812526657,-5.3819755406,-2.2177054  
195\H,-8.1472105822,-4.2436763909,-2.0357449371\H,-7.982433991,-5.2161  
453018,-3.5286997515\C,-5.5837942075,-4.1187399946,-4.4323297826\H,-6.  
1219445555,-4.6739861443,-5.2224756812\H,-4.9967477328,-3.3166737235,-  
4.9142504141\H,-4.8739157321,-4.8183261991,-3.9537051698\C,-5.64840161  
45,1.7139554672,-2.438897793\H,-6.2872436344,1.3412377333,-3.260813852  
6\H,-5.8708765226,2.7887242929,-2.3046151067\H,-4.5932777175,1.6170566  
768,-2.7449653735\C,-7.3772986223,1.0927151389,-0.6715665439\H,-7.6351  
421103,2.1588565625,-0.5327710676\H,-8.0757669948,0.670769542,-1.41759  
59621\H,-7.5495271676,0.571595488,0.2874943695\C,5.9547661115,1.266617  
9076,-2.0975907901\H,6.465495599,0.8873316238,-1.1927597055\C,1.340513  
1405,3.1683278039,-3.1985060708\H,0.3372194609,3.0299660485,-2.7615729  
934\C,2.7930070952,2.5262675385,1.6837380625\H,2.0632246722,3.34146010  
28,1.8249596922\C,5.8334095184,0.0893183217,-3.083950343\H,6.827477484  
, -0.3490996277,-3.2846258181\H,5.1879391773,-0.7062376296,-2.675065800  
9\H,5.4058466729,0.412273077,-4.0509352906\C,6.8252835611,2.3962543504  
, -2.686825466\H,6.3630393615,2.8150986271,-3.5999076102\H,6.9533033231  
,3.220710368,-1.9627820914\H,7.82807215,2.016829235,-2.9568192341\C,2.  
132928458,1.2385176224,2.2222268088\H,1.2645676993,0.9477637523,1.6113  
92193\H,2.8487641283,0.396733462,2.2194318598\H,1.7875106573,1.3799966  
208,3.2623739196\C,4.0372596254,2.8872567227,2.5147587783\H,4.53550640  
77,3.7949112427,2.1293472384\H,3.7453908785,3.0772525405,3.5634046221\  
H,4.7807491289,2.0692189996,2.5273437709\C,1.5442411737,4.677285907,-3  
.4588010624\H,1.4643862949,5.2611750509,-2.5250777674\H,2.5423802577,4  
.8708271079,-3.8948017096\H,0.7817220341,5.0564603822,-4.1641344628\C,  
1.3557121896,2.379793423,-4.518549805\H,0.5212964809,2.7126602626,-5.1  
603528178\H,2.2922265133,2.5343581612,-5.0859827854\H,1.2245044166,1.3  
000229235,-4.3373079721\C,-2.1329509386,-3.980394044,-0.541259105\H,-2  
.6079994259,-4.8748926377,-0.9844305728\H,-1.7221245794,-3.3615255032,  
-1.3549159732\H,-1.2954102556,-4.3309112597,0.0888587866\H,-2.55105999  
77,-2.3646329572,0.7994665865\F,8.1905877889,-1.5020917951,-0.83295549  
99\F,7.8460792253,-2.3871602133,1.1289870641\F,8.160048601,-3.67115430  
88,-0.6091610209\O,0.5678963876,-3.0438552024,4.8351669491\C,-0.329383  
6132,-2.299638243,5.6726932558\H,-0.1934854879,-2.7021983508,6.6872931  
423\H,-0.0803483615,-1.223045933,5.6644163879\H,-1.3788241531,-2.44062  
00796,5.3559996962\\Version=ES64L-G09RevD.01\State=1-A\HF=-3628.107675  
6\RMSD=4.971e-09\RMSF=4.048e-06\Dipole=2.4711716,-2.8831426,2.9248546\  
Quadrupole=-16.5111967,6.3083454,10.2028513,-3.3560624,-18.8165761,15.  
1271013\PG=C01 [X(C66H71F3N1O5P1)]\@

Z-3a/1c (Type I; conf0)

1\1\GINC-WORKER0\FOpt\RTSPSS\def2SVP/W06\C66H71F3N1O5P1\JHIOE\01-Au  
g-2016\0\#p tpsstps/def2svp/w06 densityfit empiricaldispersion=gd3 o  
pt scrf=(smd,solvent=ch2cl2,read)\title\0,1\P,-0.9818677008,-0.28647

40475,-1.3189199417\O,-2.4704568486,0.4094067377,-1.0057589685\O,0.025  
0220899,0.7721325621,-0.456648646\O,-0.7911134418,-0.2130960564,-2.804  
4305209\O,-0.8208628845,-1.5853950239,-0.5277757291\C,-2.205438104,1.9  
252906092,0.8173813275\C,-2.7898207353,0.7741572581,0.2864083409\C,-3.  
7597129652,-0.012713971,0.9839403831\C,-4.0923657932,0.3764311589,2.27  
5293151\H,-4.848248809,-0.1891508987,2.8301769257\C,-3.455160563,1.478  
5804294,2.9160867631\C,-2.4834083083,2.2619257367,2.1915251005\C,-1.80  
9889696,3.3133038628,2.8843743756\H,-1.0406034867,3.8893984988,2.36225  
46983\C,-2.1035652202,3.5997295044,4.2096845897\H,-1.5671722988,4.4059  
533489,4.7220765229\C,-3.089360201,2.8533542841,4.9093602971\H,-3.3179  
320451,3.0948747835,5.9531769548\C,-3.7466352321,1.8119176581,4.273479  
2455\H,-4.4956424414,1.2165429375,4.8080616823\C,-1.2755132627,2.73910  
72584,-0.0178659787\C,-0.1393331087,2.1375961474,-0.5694864138\C,0.932  
8118214,2.8947267488,-1.1416485582\C,0.7535415407,4.2623196742,-1.2975  
031183\H,1.5650522162,4.8685022836,-1.7137944635\C,-0.4558288018,4.909  
0952649,-0.9087204541\C,-1.484935142,4.1462175109,-0.2454872588\C,-2.6  
875509371,4.8163450733,0.1327296203\H,-3.4878881967,4.242988076,0.6102  
687752\C,-2.8586592573,6.1708306377,-0.113236116\H,-3.7942837774,6.661  
7845776,0.1765131639\C,-1.8343287589,6.9254804204,-0.7459044697\H,-1.9  
806428925,7.9952367947,-0.931063395\C,-0.6591461893,6.3031477696,-1.13  
69361045\H,0.133751629,6.8724104598,-1.6354171209\C,5.0783051903,-1.56  
23823783,4.3417003711\C,5.0968235419,-1.0824954185,3.0179517137\H,6.01  
44461145,-0.6626762753,2.5952454639\C,3.93781627,-1.1370289668,2.24593  
43117\H,3.9525278897,-0.7497323942,1.2242344332\C,2.7397188659,-1.6542  
468042,2.7926364593\C,2.7249420159,-2.1028557068,4.1285759866\H,1.8043  
632189,-2.4964443004,4.5683774121\C,3.8958355953,-2.0721073631,4.89643  
98056\H,3.8833359035,-2.4378215738,5.926683701\C,1.4891091746,-1.63021  
62314,1.9976047747\C,0.2282608066,-1.1338662231,2.6350999687\H,-0.5707  
115181,-1.0227617247,1.8886577319\H,0.4165506052,-0.1732759534,3.14280  
66044\H,-0.0983004511,-1.8523475572,3.4095394046\N,1.4367886514,-1.980  
9883034,0.73695206\H,0.4925961535,-1.7957528868,0.2269220304\C,2.43055  
35842,-2.5716899933,-0.0935779819\C,2.4693745647,-2.1665665363,-1.4448  
792352\H,1.7621524752,-1.4212167952,-1.8167025503\C,3.4356721988,-2.68  
62982507,-2.3003372106\H,3.4927092623,-2.3593882834,-3.3421829253\C,4.  
378536285,-3.6242793441,-1.8246353991\C,4.3012708177,-4.0743501482,-0.  
4865913103\H,4.9924546344,-4.83020535,-0.1065870916\C,3.3292635644,-3.  
5492999267,0.3700894846\H,3.2706541423,-3.9092472387,1.4004735633\C,2.  
2499306284,2.2195950336,-1.394861234\C,2.5336406256,1.5960521348,-2.63  
76665568\C,3.2078319651,2.1920273485,-0.3416727772\C,3.7508078522,0.90  
64023887,-2.7835151611\C,4.4076505933,1.4806310183,-0.5371231822\C,4.6  
90871034,0.8140813078,-1.7424732055\H,3.9747651944,0.4116372113,-3.734  
9135087\H,5.1405651852,1.4484310013,0.2748026677\C,-4.3910718162,-1.19  
69462211,0.3180066104\C,-4.1544238341,-2.511560796,0.8064563673\C,-5.2  
364263388,-1.0048944237,-0.8120450925\C,-4.7830677032,-3.5982303695,0.  
166951773\C,-5.8327193019,-2.1240669037,-1.4172016743\C,-5.6224532204,  
-3.4318310789,-0.9452494919\H,-4.6041954497,-4.6128472672,0.5434178592  
\H,-6.4853440087,-1.9680172802,-2.2839681389\C,6.3562540318,-1.5267400  
876,5.1430969523\C,-5.5543312956,0.3841141165,-1.3699559315\H,-4.96351  
72427,1.1238959553,-0.8049318632\C,-3.2308866548,-2.7936601781,1.99398  
8142\C,-6.2731765376,-4.6326414522,-1.625981984\H,-5.9647974438,-5.531  
7540023,-1.060089022\C,-4.0331581494,-3.2364913036,3.2348661059\H,-3.3  
596288829,-3.3930010938,4.0979096969\H,-4.7853638766,-2.4799120984,3.5  
204968328\H,-4.5663780076,-4.1866331666,3.0455555261\C,-5.7714782883,-  
4.7968437102,-3.0756589385\H,-6.0609179075,-3.9306250644,-3.698849193\  
H,-4.670777631,-4.8842614677,-3.1083015779\H,-6.2030734575,-5.70381592  
77,-3.5376473923\C,-7.8129347935,-4.5541828164,-1.5762722932\H,-8.2638

300796,-5.4614143572,-2.018799041\H,-8.1748481416,-4.4636406737,-0.536  
333279\H,-8.18795399,-3.6824584912,-2.1437264381\C,-5.1516543337,0.514  
040307,-2.8530052961\H,-5.7511870996,-0.1555325452,-3.4972320711\H,-5.  
3155964688,1.5493062733,-3.2049139438\H,-4.0850580608,0.2693671218,-2.  
9905742424\C,-7.0406665958,0.7392841175,-1.1550551985\H,-7.2486828839,  
1.7655609953,-1.5100581417\H,-7.7036313957,0.0492234497,-1.7088784559\  
H,-7.3122340336,0.6851988518,-0.0853577367\C,5.9918603002,0.0420464446  
, -1.9588566531\H,5.8008341648,-0.6771735428,-2.7779894695\C,1.55933116  
28,1.7212431586,-3.8084938861\H,0.5440742292,1.7729571502,-3.378812182  
7\C,2.9382068751,2.9162772013,0.9843286599\H,2.2878033414,3.7763861436  
,0.7481041801\C,7.1171403405,0.9911564246,-2.4252383927\H,8.0475975787  
,0.4292396007,-2.6281822736\H,6.8304281485,1.5256171333,-3.3483569544\  
H,7.3372760285,1.7479786707,-1.6493745307\C,6.4308063115,-0.7703538716  
, -0.7273650776\H,6.733413074,-0.1133532005,0.1082921547\H,5.6206771905  
, -1.4298575661,-0.3728573908\H,7.2997540441,-1.4052165262,-0.978197828  
8\C,2.1633499519,2.0295910973,1.984225281\H,1.2741814791,1.5741473342,  
1.5222017872\H,2.8044481017,1.2139512015,2.3592502302\H,1.8312420784,2  
.6252055845,2.8540278575\C,4.209502086,3.4797538144,1.6447512533\H,4.7  
951956833,4.0978951072,0.9408355371\H,3.9352446878,4.1130300847,2.5077  
744315\H,4.867906377,2.6780108465,2.0265576957\C,1.8262284053,3.030519  
3373,-4.5841007884\H,1.7606417912,3.9128519462,-3.9245270443\H,2.83611  
71847,3.0193882743,-5.0354212692\H,1.0886388773,3.1578524225,-5.398028  
818\C,1.5712455768,0.5163490737,-4.7639092245\H,0.7615140517,0.6259005  
91,-5.5072471556\H,2.5221530807,0.4345744127,-5.3224532748\H,1.3931091  
685,-0.4243409843,-4.2181054098\C,-2.1365945049,-3.8233151334,1.645177  
492\H,-2.5661172665,-4.8189874442,1.4304178092\H,-1.5605885188,-3.4908  
439437,0.7659986638\H,-1.4406336186,-3.9434227666,2.495826112\H,-2.720  
980225,-1.850299774,2.2487547806\O,5.3137373833,-4.0274606526,-2.71733  
14378\C,6.3372827748,-4.9377847071,-2.2911426751\H,5.9078395607,-5.907  
5624898,-1.9790903686\H,6.9850045535,-5.0880528342,-3.1673504563\H,6.9  
313363333,-4.5084765525,-1.4632361718\F,7.2691807271,-2.4184238808,4.6  
70079658\F,6.9496258237,-0.3051178332,5.0858292091\F,6.1629843267,-1.8  
167650597,6.4512637744\\Version=ES64L-G09RevD.01\State=1-A\HF=-3628.10  
10098\RMSD=4.070e-09\RMSF=4.213e-06\Dipole=3.6222487,-2.2139638,3.7624  
43\Quadrupole=0.7404375,14.0775285,-14.8179659,-20.9377776,-19.060918,  
-2.2193721\PG=C01 [X(C66H71F3N1O5P1)]\@

Z-3a/1c (Type I; conf1)

1\1\GINC-WORKER1\FOpt\RTPSSTPSS\def2SVP/W06\C66H71F3N1O5P1\JHIOE\01-Au  
g-2016\0\#p tpsstps/def2svp/w06 densityfit empiricaldispersion=gd3 o  
pt scrf=(smd,solvent=ch2cl2,read)\title\0,1\P,-0.9887272982,-0.26009  
24839,-1.3308544819\O,-2.4782284744,0.4343914773,-1.0189533862\O,0.021  
3193211,0.8067781103,-0.478938276\O,-0.7986777343,-0.1964682599,-2.816  
9903075\O,-0.8287335601,-1.5493773559,-0.5242168213\C,-2.2092256134,1.  
9501111702,0.802519814\C,-2.792011198,0.7966455851,0.2756996152\C,-3.7  
493078862,0.0023842917,0.9821538092\C,-4.0738386825,0.3905207738,2.276  
0670735\H,-4.8201258811,-0.1803691191,2.8385432103\C,-3.4394714844,1.4  
97715186,2.9107493561\C,-2.478051655,2.2862639916,2.1780961184\C,-1.80  
50120948,3.3421765221,2.8644434702\H,-1.0424694632,3.9214678609,2.3357  
818713\C,-2.0905587131,3.6285887636,4.1915561664\H,-1.5552383072,4.438  
6330004,4.6990648406\C,-3.0662459393,2.8767924552,4.8996821682\H,-3.28  
77588313,3.1178656661,5.9450833087\C,-3.7220544833,1.8305319213,4.2702  
128532\H,-4.4624539774,1.2305703193,4.8115822379\C,-1.2896139426,2.767  
1886218,-0.0409411949\C,-0.1523252151,2.1707791861,-0.5953930088\C,0.9  
095176145,2.9334982516,-1.1782525813\C,0.713956678,4.2967373814,-1.351  
8117615\H,1.5180664661,4.9062640119,-1.7776297747\C,-0.4993806988,4.93

55231769,-0.9619797907\C,-1.5134262759,4.170608873,-0.2778819173\C,-2.  
7168395488,4.8339651213,0.1096105166\H,-3.5053231104,4.2589543352,0.60  
44666875\C,-2.9033648985,6.1841164549,-0.1486686857\H,-3.8391283272,6.  
6700064757,0.1490574288\C,-1.8947222822,6.9406420551,-0.8038224599\H,-  
2.0534937776,8.0068720308,-0.9988822253\C,-0.7188618622,6.3249595403,-  
1.2033712665\H,0.0623582892,6.8962352585,-1.7177323541\C,5.1136704331,  
-1.6688801316,4.3089852424\C,5.1391240816,-1.211823625,2.9777887012\H,  
6.0695166351,-0.8386123539,2.5395797906\C,3.9712950837,-1.2295525232,2.  
.2170932164\H,3.9931512306,-0.8584896043,1.1896240202\C,2.7575854748,-  
1.6870713443,2.7828524599\C,2.7381746415,-2.1141953127,4.1263968095\H,  
1.8068529144,-2.4620754425,4.581592729\C,3.9165300664,-2.1209425454,4.  
8826560382\H,3.8992269785,-2.4695924893,5.9186377473\C,1.4999461635,-1.  
.6204750921,2.0033236829\C,0.2514834877,-1.119174948,2.6627541862\H,-0.  
.5384893443,-0.9431230987,1.9188495666\H,0.4645353676,-0.1940967566,3.  
2228967286\H,-0.1044983665,-1.8701362755,3.3921361765\N,1.4272537964,-  
1.9374501539,0.7353837044\H,0.4788716941,-1.7365506755,0.2379053578\C,  
2.3952392874,-2.5381036992,-0.1192271318\C,2.475064878,-2.0650293183,-  
1.4399401041\H,1.8394305552,-1.237834078,-1.7658551593\C,3.3939330962,  
-2.6171187159,-2.3375301638\H,3.4499468012,-2.2135935408,-3.3507068151  
\C,4.2400111346,-3.664230207,-1.9153547254\C,4.126925287,-4.1650832196  
, -0.5955890517\H,4.7703347653,-4.996792793,-0.2931014405\C,3.214365123  
, -3.6095425425,0.2963872573\H,3.1260507298,-4.0108188179,1.3095811137\  
C,2.2412587306,2.2795843004,-1.4090903685\C,2.5638572702,1.6650406753,  
-2.6457582399\C,3.1765275249,2.2702945914,-0.3349921502\C,3.8095232833  
,1.0222542868,-2.7752305606\C,4.4020883093,1.6017604167,-0.5116366907\  
C,4.7344402409,0.9615292765,-1.7193390366\H,4.068845024,0.5423141035,-  
3.7254790915\H,5.1183023872,1.5818842818,0.3162929865\C,-4.3753964357,  
-1.1896690259,0.3255336233\C,-4.1265492342,-2.5000280148,0.820047235\C  
, -5.2320270651,-1.0099003952,-0.7980274503\C,-4.7563122096,-3.59370422  
71,0.194016996\C,-5.8292298495,-2.1360720428,-1.3895698843\C,-5.608228  
5186,-3.4394305065,-0.910248741\H,-4.5683697586,-4.6048525181,0.575344  
5878\H,-6.4915464939,-1.9895385067,-2.2508560211\C,6.4004360974,-1.677  
7765051,5.0974281431\C,-5.5616432955,0.3738499637,-1.3628383658\H,-4.9  
718421116,1.120895518,-0.8063668062\C,-3.1906466926,-2.7717402523,1.99  
98116326\C,-6.2592946719,-4.6490516137,-1.5749101835\H,-5.950915138,-5.  
.5408668548,-0.9974530379\C,-3.9791240762,-3.2196889809,3.2476411969\H  
, -3.2988349548,-3.3625086695,4.1077674436\H,-4.7412104926,-2.472991214  
,3.5333405047\H,-4.4990011083,-4.178455345,3.064946727\C,-5.756839092,  
-4.8315161884,-3.0220722188\H,-6.0419401176,-3.9707977503,-3.654856157  
4\H,-4.6564137558,-4.9235223183,-3.0521797387\H,-6.1918944096,-5.74179  
42075,-3.4742040219\C,-7.7989500817,-4.5707042721,-1.5270060706\H,-8.2  
489362272,-5.4834829048,-1.9589221726\H,-8.1614174705,-4.4683609163,-0.  
.4883407734\H,-8.1741610736,-3.7061876081,-2.1052273505\C,-5.168253741  
8,0.4953383971,-2.8488066667\H,-5.7678795834,-0.1829639212,-3.48368519  
45\H,-5.3397082614,1.5270092489,-3.2076813156\H,-4.1012381266,0.254850  
9029,-2.9902631859\C,-7.0487440595,0.7219079652,-1.1419037008\H,-7.265  
0671138,1.7442448623,-1.5032455937\H,-7.7108635842,0.0240253595,-1.686  
9001565\H,-7.3139581973,0.6746565444,-0.070265527\C,6.0703415443,0.244  
565251,-1.9020709838\H,5.9936935282,-0.3378602419,-2.8397842035\C,1.59  
68562758,1.7448092353,-3.826187111\H,0.5777163573,1.791939226,-3.40486  
27698\C,2.8535462979,2.9552958714,0.9983199617\H,2.1277264426,3.757908  
1947,0.7813877348\C,7.2225038733,1.256525002,-2.0747533243\H,8.1802572  
047,0.7336459089,-2.2533780704\H,7.0356995781,1.9322891787,-2.92832390  
97\H,7.3390363759,1.8788191032,-1.1679672407\C,6.3716170121,-0.7450641  
672,-0.7604231274\H,6.5419290656,-0.216587851,0.194933048\H,5.54110421  
04,-1.4568830973,-0.6165654684\H,7.2837676442,-1.3277635403,-0.9839374

282\C,2.1675693335,1.9813638411,1.9804447053\H,1.3092391384,1.47448783  
64,1.5127747497\H,2.8772078112,1.2061717354,2.3164052877\H,1.804272065  
1,2.5196770501,2.8750211002\C,4.0768115528,3.6175726252,1.6578076316\H  
,4.5970080081,4.2971187157,0.9590381297\H,3.756759366,4.2083029975,2.5  
350099153\H,4.8080783621,2.8709153651,2.0176747338\C,1.8465573056,3.03  
66110272,-4.6351047115\H,1.7612800329,3.9342888654,-3.9986561802\H,2.8  
592885269,3.0315232298,-5.0801347567\H,1.1120702638,3.1294832426,-5.45  
64455561\C,1.6347815304,0.5117870135,-4.7446872942\H,0.8357495086,0.59  
01963768,-5.5032895414\H,2.5951385866,0.4214664675,-5.2852108051\H,1.4  
567927306,-0.41296629,-4.1718594261\C,-2.091882655,-3.793866114,1.6425  
712538\H,-2.5151815444,-4.7945776501,1.4390855911\H,-1.53091586,-3.460  
4813501,0.754315526\H,-1.3836740087,-3.9024340648,2.4845378484\H,-2.68  
54180237,-1.8244169728,2.2482181917\O,5.181509513,-4.2491778572,-2.693  
3882829\C,5.3770703707,-3.7576942363,-4.0269582807\H,5.6654283149,-2.6  
902428841,-4.0190394027\H,6.1975963281,-4.357340542,-4.4475997957\H,4.  
4684650014,-3.8944629016,-4.6418181796\F,7.265134566,-2.6213274477,4.6  
348798467\F,7.0506628609,-0.4874141993,5.009914873\F,6.2061921205,-1.9  
317918634,6.4129417881\Version=ES64L-G09RevD.01\State=1-A\HF=-3628.10  
16263\RMSD=8.990e-09\RMSF=2.917e-06\Dipole=3.121693,-1.3789525,2.83801  
76\Quadrupole=-6.7312333,4.4129873,2.318246,-8.0102247,-26.1564082,0.7  
29529\PG=C01 [X(C66H71F3N1O5P1)]\@

Z-3a/1c (Type I; conf2)

1\1\GINC-LOGIN\FOpt\RTSPSS\def2SVP/W06\C66H71F3N1O5P1\JHIOE\11-Mar-  
2016\0\#p tpsstps\def2svp/w06 densityfit empiricaldispersion=gd3 opt  
scrf=(smd,solvent=ch2cl2,read)\title\0,1\p,-1.4858622053,0.00842069  
33,-1.4122527605\O,-2.9663617945,0.5097399765,-0.8166984503\O,-0.44932  
56524,0.9972402681,-0.4998231984\O,-1.4838556924,0.3419441607,-2.87419  
36446\O,-1.1461084039,-1.3813289567,-0.8721427573\C,-2.5678940847,1.68  
88389488,1.2176101924\C,-3.134863403,0.6022327454,0.5506125798\C,-3.93  
36090196,-0.3928413985,1.1971244377\C,-4.113732151,-0.2775058574,2.569  
7689519\H,-4.7390170421,-1.0070523442,3.095018763\C,-3.480157237,0.750  
1293327,3.327196013\C,-2.6785493519,1.7436383278,2.6537366755\C,-1.995  
8650445,2.7143497132,3.4477574593\H,-1.3501000803,3.4471006836,2.95529  
22264\C,-2.1251284127,2.7274916237,4.8290780008\H,-1.5851423863,3.4775  
408745,5.4174296411\C,-2.946053681,1.7728124263,5.4873529379\H,-3.0452  
152744,1.7981857967,6.5780264104\C,-3.6049127517,0.802708952,4.7486370  
099\H,-4.2252007272,0.0486614049,5.2465159935\C,-1.8208587034,2.723350  
0186,0.4446913381\C,-0.728487986,2.3393149505,-0.3405027954\C,0.192895  
9717,3.2858265306,-0.8925762134\C,-0.1134602207,4.6351237404,-0.780851  
3113\H,0.5847493647,5.3803598965,-1.1765201254\C,-1.3029605861,5.08321  
68617,-0.1355821096\C,-2.1659960376,4.1208520792,0.505033485\C,-3.3489  
994258,4.5942131932,1.1492058894\H,-4.0268959835,3.872077317,1.6140864  
261\C,-3.655180853,5.9469342103,1.1763005065\H,-4.5733982229,6.2863790  
8,1.6682618933\C,-2.7923813772,6.895564521,0.5642727669\H,-3.044207606  
6,7.9612627318,0.5959771306\C,-1.6419056996,6.4685726599,-0.0802723205  
\H,-0.9738955403,7.1901173824,-0.564368928\C,5.4055301182,-1.848690128  
1,3.0761667209\C,5.2178199812,-1.1622862327,1.8634050714\H,6.055203213  
2,-0.6461998363,1.3859041171\C,3.9553007458,-1.134860211,1.2704582019\  
H,3.8133197886,-0.5855817926,0.336507237\C,2.8608667581,-1.7803420362,  
1.8910510933\C,3.0533440538,-2.4356304426,3.1256568627\H,2.214815295,-  
2.9282204225,3.6253968815\C,4.3241068849,-2.4830800672,3.7085252833\H,  
4.471150578,-3.0060379285,4.6577652849\C,1.5052071957,-1.6858851421,1.  
3019082316\C,0.3309490535,-1.4192072129,2.1933551216\H,-0.562103027,-1  
.178484557,1.5991956845\H,0.5626223939,-0.596602869,2.8892937401\H,0.1  
232749686,-2.3174891966,2.8039151569\N,1.2772669174,-1.7825756877,0.01

66915811\H,0.2586222503,-1.5821690624,-0.3147865146\C,2.1547342425,-2.1381539287,-1.0474067219\C,2.0304786702,-1.4290869995,-2.2539739848\H,1.3104888676,-0.6110665694,-2.3381782807\C,2.8525939868,-1.7327123931,-3.3434311132\H,2.7509738425,-1.1483955549,-4.260376872\C,3.8063067444,-2.766361737,-3.2322203864\C,3.8985467111,-3.5056390125,-2.0279024017\H,4.6231645488,-4.3233255051,-1.9681334337\C,3.082052871,-3.1967718296,-0.9438623869\H,3.1521514314,-3.7800691956,-0.0216740276\C,1.5217875009,2.8056080599,-1.4009831219\C,1.7150499273,2.45107307,-2.7605769639\C,2.5911547968,2.6879673232,-0.4677341625\C,2.9703511729,1.951160704,-3.1552933777\C,3.8219040251,2.1688661549,-0.9107649676\C,4.0295189285,1.7830600434,-2.2474863794\H,3.1306918324,1.6712986548,-4.202431665\H,4.6416333214,2.0638735153,-0.1924370745\C,-4.5482364793,-1.5008525914,0.3983794345\C,-4.1376707785,-2.8499596999,0.5997586786\C,-5.5519913655,-1.2055361876,-0.5650862546\C,-4.7506637851,-3.8670126275,-0.1537915971\C,-6.1305040778,-2.2612120284,-1.2946158393\C,-5.747198004,-3.5986822341,-1.1077168337\H,-4.4306761372,-4.9033264954,0.0042520739\H,-6.9091732211,-2.03543196,-2.0338812606\C,6.7864577226,-1.9456644525,3.6778493848\C,-6.0553382924,0.2182203098,-0.8131716488\H,-5.4580449773,0.9055955733,-0.1914104102\C,-3.0486240368,-3.2395833393,1.6018447284\C,-6.3790794228,-4.7190574987,-1.9288310712\H,-7.153838625,-4.2551633362,-2.567849355\C,-3.6523576836,-3.9661968525,2.8214808308\H,-2.8677156668,-4.1978351534,3.5655374228\H,-4.4244139104,-3.3510438797,3.3167272421\H,-4.1243015986,-4.91938926,2.5188480667\C,-7.0721979281,-5.7663111127,-1.0340986853\H,-6.3424082556,-6.283009748,-0.3839892506\H,-7.8326290513,-5.2968896819,-0.3845491872\H,-7.5736813633,-6.5346030071,-1.6507989693\C,-5.3412395572,-5.3822777782,-2.8585165881\H,-5.8180924903,-6.1575509332,-3.4861693921\H,-4.8723913005,-4.638371244,-3.5270641242\H,-4.5370043772,-5.8671254019,-2.2749081266\C,-5.8626402991,0.6468303449,-2.2818178566\H,-6.4864912859,0.0422318874,-2.9658073782\H,-6.1527729972,1.7056746538,-2.4132254298\H,-4.8073702836,0.5393996204,-2.5837298286\C,-7.5249544816,0.3723743261,-0.3683044934\H,-7.8624335772,1.4168743994,-0.5009656663\H,-8.1951811881,-0.2768286038,-0.9613447696\H,-7.6490068047,0.1056848981,0.6968229075\C,5.3707760066,1.2272450427,-2.7211697619\H,5.2028617412,0.8092766578,-3.7319592915\C,0.5973580674,2.6552782637,-3.7824015511\H,-0.3581243202,2.535995445,-3.2429404114\C,2.4063525199,3.0955073117,0.9987874085\H,1.5997835882,3.8481682515,1.0259886935\C,6.4203162429,2.3510952465,-2.8509215073\H,7.3761414554,1.9523019686,-3.238163618\H,6.0742448345,3.1425304827,-3.5394207835\H,6.6200083605,2.8188580073,-1.8688675156\C,5.8902672101,0.087306557,-1.8245810777\H,6.1577106782,0.4568679471,-0.818094093\H,5.1348808667,-0.7085618193,-1.7096931769\H,6.7979578116,-0.3662983489,-2.262575879\C,1.9369226139,1.9015811251,1.8573789463\H,1.0630773081,1.4032348479,1.4094157418\H,2.7422301511,1.1533832755,1.9527588884\H,1.6600664121,2.2348682229,2.8744362407\C,3.6562780572,3.7497547157,1.6144973154\H,4.019524618,4.5913339748,0.9977253473\H,3.4184304137,4.1405965567,2.6202742905\H,4.4855033264,3.0286513731,1.7331424343\C,0.6536327001,4.0879343078,-4.3566742893\H,0.5915087103,4.8465253434,-3.5574088403\H,1.5983740027,4.2529247295,-4.9079680803\H,-0.1854658528,4.2596865144,-5.0560320643\C,0.5951350551,1.6154582036,-4.9158448218\H,-0.3023497823,1.7545459325,-5.5445451111\H,1.4778423017,1.7135120343,-5.574369809\H,0.5601560236,0.59071206,-4.511364043\C,-1.9353608214,-4.0859519738,0.951189028\H,-2.3111059449,-5.0717215139,0.6207314031\H,-1.5110792743,-3.560157746,0.0805724037\H,-1.1238054366,-4.272093498,1.6784744785\H,-2.58126137,-2.309956986,1.9646424435\F,6.75250808,-2.0163169403,5.0319423733\F,7.5667268908,-0.8861127051,3.3496254786\F,7.4407148085,-3.0592353284,3.2467917758\O,4.6679658846,-3.1218754423,-4.2147240431\C,4.6514556199,-2.384

9074913,-5.4455359181\H,4.8736506556,-1.3157632372,-5.2717286474\H,5.4  
417815207,-2.8287022918,-6.0685985777\H,3.6776750169,-2.4853072717,-5.  
95932476\Version=ES64L-G09RevD.01\State=1-A\HF=-3628.1015614\RMSD=2.1  
82e-09\RMSF=2.131e-06\Dipole=3.5584571,-1.5293111,2.1549028\Quadrupole  
=-12.4463736,3.1263475,9.3200261,-3.2259177,-25.3660731,-0.2278843\PG=  
C01 [X(C66H71F3N1O5P1)]\@

Z-3a/1c (Type I; conf3)

1\1\GINC-WORKER1\FOpt\RTPSS\TPSS\def2SVP\W06\C66H71F3N1O5P1\JHIOE\01-Au  
g-2016\0\#p tpsstps/def2svp/w06 densityfit empiricdispersion=gd3 o  
pt scrf=(smd,solvent=ch2cl2,read)\title\0,1\P,-0.9887272982,-0.26009  
24839,-1.3308544819\O,-2.4782284744,0.4343914773,-1.0189533862\O,0.021  
3193211,0.8067781103,-0.478938276\O,-0.7986777343,-0.1964682599,-2.816  
9903075\O,-0.8287335601,-1.5493773559,-0.5242168213\C,-2.2092256134,1.  
9501111702,0.802519814\C,-2.792011198,0.7966455851,0.2756996152\C,-3.7  
493078862,0.0023842917,0.9821538092\C,-4.0738386825,0.3905207738,2.276  
0670735\H,-4.8201258811,-0.1803691191,2.8385432103\C,-3.4394714844,1.4  
97715186,2.9107493561\C,-2.478051655,2.2862639916,2.1780961184\C,-1.80  
50120948,3.3421765221,2.8644434702\H,-1.0424694632,3.9214678609,2.3357  
818713\C,-2.0905587131,3.6285887636,4.1915561664\H,-1.5552383072,4.438  
6330004,4.6990648406\C,-3.0662459393,2.8767924552,4.8996821682\H,-3.28  
77588313,3.1178656661,5.9450833087\C,-3.7220544833,1.8305319213,4.2702  
128532\H,-4.4624539774,1.2305703193,4.8115822379\C,-1.2896139426,2.767  
1886218,-0.0409411949\C,-0.1523252151,2.1707791861,-0.5953930088\C,0.9  
095176145,2.9334982516,-1.1782525813\C,0.713956678,4.2967373814,-1.351  
8117615\H,1.5180664661,4.9062640119,-1.7776297747\C,-0.4993806988,4.93  
55231769,-0.9619797907\C,-1.5134262759,4.170608873,-0.2778819173\C,-2.  
7168395488,4.8339651213,0.1096105166\H,-3.5053231104,4.2589543352,0.60  
44666875\C,-2.9033648985,6.1841164549,-0.1486686857\H,-3.8391283272,6.  
6700064757,0.1490574288\C,-1.8947222822,6.9406420551,-0.8038224599\H,-  
2.0534937776,8.0068720308,-0.9988822253\C,-0.7188618622,6.3249595403,-  
1.2033712665\H,0.0623582892,6.8962352585,-1.7177323541\C,5.1136704331,  
-1.6688801316,4.3089852424\C,5.1391240816,-1.211823625,2.9777887012\H,  
6.0695166351,-0.8386123539,2.5395797906\C,3.9712950837,-1.2295525232,2.  
.2170932164\H,3.9931512306,-0.8584896043,1.1896240202\C,2.7575854748,-  
1.6870713443,2.7828524599\C,2.7381746415,-2.1141953127,4.1263968095\H,  
1.8068529144,-2.4620754425,4.581592729\C,3.9165300664,-2.1209425454,4.  
8826560382\H,3.8992269785,-2.4695924893,5.9186377473\C,1.4999461635,-1  
.6204750921,2.0033236829\C,0.2514834877,-1.119174948,2.6627541862\H,-0  
.5384893443,-0.9431230987,1.9188495666\H,0.4645353676,-0.1940967566,3.  
2228967286\H,-0.1044983665,-1.8701362755,3.3921361765\N,1.4272537964,-  
1.9374501539,0.7353837044\H,0.4788716941,-1.7365506755,0.2379053578\C,  
2.3952392874,-2.5381036992,-0.1192271318\C,2.475064878,-2.0650293183,-  
1.4399401041\H,1.8394305552,-1.237834078,-1.7658551593\C,3.3939330962,  
-2.6171187159,-2.3375301638\H,3.4499468012,-2.2135935408,-3.3507068151  
\C,4.2400111346,-3.664230207,-1.9153547254\C,4.126925287,-4.1650832196  
, -0.5955890517\H,4.7703347653,-4.996792793,-0.2931014405\C,3.214365123  
, -3.6095425425,0.2963872573\H,3.1260507298,-4.0108188179,1.3095811137\  
C,2.2412587306,2.2795843004,-1.4090903685\C,2.5638572702,1.6650406753,  
-2.6457582399\C,3.1765275249,2.2702945914,-0.3349921502\C,3.8095232833  
,1.0222542868,-2.7752305606\C,4.4020883093,1.6017604167,-0.5116366907\  
C,4.7344402409,0.9615292765,-1.7193390366\H,4.068845024,0.5423141035,-  
3.7254790915\H,5.1183023872,1.5818842818,0.3162929865\C,-4.3753964357,  
-1.1896690259,0.3255336233\C,-4.1265492342,-2.5000280148,0.820047235\C  
, -5.2320270651,-1.0099003952,-0.7980274503\C,-4.7563122096,-3.59370422  
71,0.194016996\C,-5.8292298495,-2.1360720428,-1.3895698843\C,-5.608228



5186,-3.4394305065,-0.910248741\H,-4.5683697586,-4.6048525181,0.575344  
5878\H,-6.4915464939,-1.9895385067,-2.2508560211\C,6.4004360974,-1.677  
7765051,5.0974281431\C,-5.5616432955,0.3738499637,-1.3628383658\H,-4.9  
718421116,1.120895518,-0.8063668062\C,-3.1906466926,-2.7717402523,1.99  
98116326\C,-6.2592946719,-4.6490516137,-1.5749101835\H,-5.950915138,-5  
.5408668548,-0.9974530379\C,-3.9791240762,-3.2196889809,3.2476411969\H  
, -3.2988349548,-3.3625086695,4.1077674436\H,-4.7412104926,-2.472991214  
,3.5333405047\H,-4.4990011083,-4.178455345,3.064946727\C,-5.756839092,  
-4.8315161884,-3.0220722188\H,-6.0419401176,-3.9707977503,-3.654856157  
4\H,-4.6564137558,-4.9235223183,-3.0521797387\H,-6.1918944096,-5.74179  
42075,-3.4742040219\C,-7.7989500817,-4.5707042721,-1.5270060706\H,-8.2  
489362272,-5.4834829048,-1.9589221726\H,-8.1614174705,-4.4683609163,-0  
.4883407734\H,-8.1741610736,-3.7061876081,-2.1052273505\C,-5.168253741  
8,0.4953383971,-2.8488066667\H,-5.7678795834,-0.1829639212,-3.48368519  
45\H,-5.3397082614,1.5270092489,-3.2076813156\H,-4.1012381266,0.254850  
9029,-2.9902631859\C,-7.0487440595,0.7219079652,-1.1419037008\H,-7.265  
0671138,1.7442448623,-1.5032455937\H,-7.7108635842,0.0240253595,-1.686  
9001565\H,-7.3139581973,0.6746565444,-0.070265527\C,6.0703415443,0.244  
565251,-1.9020709838\H,5.9936935282,-0.3378602419,-2.8397842035\C,1.59  
68562758,1.7448092353,-3.826187111\H,0.5777163573,1.791939226,-3.40486  
27698\C,2.8535462979,2.9552958714,0.9983199617\H,2.1277264426,3.757908  
1947,0.7813877348\C,7.2225038733,1.256525002,-2.0747533243\H,8.1802572  
047,0.7336459089,-2.2533780704\H,7.0356995781,1.9322891787,-2.92832390  
97\H,7.3390363759,1.8788191032,-1.1679672407\C,6.3716170121,-0.7450641  
672,-0.7604231274\H,6.5419290656,-0.216587851,0.194933048\H,5.54110421  
04,-1.4568830973,-0.6165654684\H,7.2837676442,-1.3277635403,-0.9839374  
282\C,2.1675693335,1.9813638411,1.9804447053\H,1.3092391384,1.47448783  
64,1.5127747497\H,2.8772078112,1.2061717354,2.3164052877\H,1.804272065  
1,2.5196770501,2.8750211002\C,4.0768115528,3.6175726252,1.6578076316\H  
,4.5970080081,4.2971187157,0.9590381297\H,3.756759366,4.2083029975,2.5  
350099153\H,4.8080783621,2.8709153651,2.0176747338\C,1.8465573056,3.03  
66110272,-4.6351047115\H,1.7612800329,3.9342888654,-3.9986561802\H,2.8  
592885269,3.0315232298,-5.0801347567\H,1.1120702638,3.1294832426,-5.45  
64455561\C,1.6347815304,0.5117870135,-4.7446872942\H,0.8357495086,0.59  
01963768,-5.5032895414\H,2.5951385866,0.4214664675,-5.2852108051\H,1.4  
567927306,-0.41296629,-4.1718594261\C,-2.091882655,-3.793866114,1.6425  
712538\H,-2.5151815444,-4.7945776501,1.4390855911\H,-1.53091586,-3.460  
4813501,0.754315526\H,-1.3836740087,-3.9024340648,2.4845378484\H,-2.68  
54180237,-1.8244169728,2.2482181917\O,5.181509513,-4.2491778572,-2.693  
3882829\C,5.3770703707,-3.7576942363,-4.0269582807\H,5.6654283149,-2.6  
902428841,-4.0190394027\H,6.1975963281,-4.357340542,-4.4475997957\H,4.  
4684650014,-3.8944629016,-4.6418181796\F,7.265134566,-2.6213274477,4.6  
348798467\F,7.0506628609,-0.4874141993,5.009914873\F,6.2061921205,-1.9  
317918634,6.4129417881\\Version=ES64L-G09RevD.01\State=1-A\HF=-3628.10  
16263\RMSD=8.990e-09\RMSF=2.917e-06\Dipole=3.121693,-1.3789525,2.83801  
76\Quadrupole=-6.7312333,4.4129873,2.318246,-8.0102247,-26.1564082,0.7  
29529\PG=C01 [X(C66H71F3N1O5P1)]\@

Z-3a/1c (Type I; conf4)

1\1\GINC-LOGIN\FOpt\RTPSSTPSS\def2SVP/W06\C66H71F3N1O5P1\JHIOE\02-Aug-  
2016\0\#p tpsstps/def2svp/w06 densityfit empiricaldispersion=gd3 opt  
scrf=(smd,solvent=ch2cl2,read)\title\0,1\P,-1.4223701899,-0.5238984  
964,-1.2771084733\O,-2.8275713294,0.356807167,-1.0650931822\O,-0.27129  
93202,0.5913461128,-0.7063663501\O,-1.3039587629,-0.792669181,-2.74836  
88205\O,-1.3583057841,-1.6392422721,-0.2328265061\C,-2.3286173109,2.16  
36952864,0.4017728782\C,-3.0305288533,0.9860122841,0.1476655956\C,-3.9

904666883,0.4288900792,1.0490041397\C,-4.2012230013,1.0949333601,2.250  
1904966\H,-4.9464073299,0.7111456412,2.9547654679\C,-3.4510788213,2.25  
11342091,2.6124472741\C,-2.4846527849,2.7933294864,1.6882955209\C,-1.6  
977934208,3.9086046484,2.1073776829\H,-0.9326273337,4.3039587961,1.433  
0397763\C,-1.8786038692,4.4808844057,3.3582862734\H,-1.2584206565,5.33  
19278004,3.6606790522\C,-2.8568900645,3.9690841702,4.2528902862\H,-2.9  
947194077,4.4347717562,5.2348364212\C,-3.6223146699,2.8735134804,3.885  
8017108\H,-4.3668451545,2.4575004014,4.5741944305\C,-1.4005557123,2.70  
75568675,-0.6307598039\C,-0.3371302493,1.9181528655,-1.0860927336\C,0.  
7537708761,2.4704661285,-1.8347980817\C,0.6380404945,3.7815805249,-2.2  
797211202\H,1.46428829,4.2303730796,-2.8418973592\C,-0.5126758021,4.57  
52595664,-2.0043353837\C,-1.5430170237,4.0438749895,-1.1473419796\C,-2  
.6831945485,4.8578031188,-0.8714432487\H,-3.4849556274,4.4565519704,-0  
.2439115912\C,-2.7942315952,6.1340271815,-1.4037385916\H,-3.6834423262  
,6.7365918357,-1.1878390156\C,-1.768900586,6.6632186861,-2.2331146906\  
H,-1.8677154259,7.6737191076,-2.6445109597\C,-0.6524523859,5.895928985  
3,-2.5272932017\H,0.1412805878,6.2897927456,-3.1723678016\C,5.12844318  
03,-0.1129033298,3.2513064229\C,4.9214947532,-0.4689242636,1.906423856  
4\H,5.7352433547,-0.3797983683,1.1810798811\C,3.6662478719,-0.90622739  
36,1.4900531771\H,3.5048434703,-1.1239252049,0.4326715483\C,2.59667785  
28,-0.9976652856,2.4128273488\C,2.8208820586,-0.6449326442,3.761547932  
1\H,2.007598682,-0.7050722433,4.4902190803\C,4.0831380878,-0.211063440  
9,4.1816556073\H,4.248283597,0.0654495032,5.226324307\C,1.2243228774,-  
1.264381127,1.9333728841\C,0.074315462,-0.541590798,2.5698603545\H,-0.  
8216396855,-0.6100155388,1.9365456714\H,0.3291534978,0.5125511485,2.75  
97481977\H,-0.1469253442,-1.0113297305,3.5471191114\N,0.9413544867,-2.  
0495884001,0.9201856243\H,-0.0506978932,-1.9223380171,0.4951120979\C,1  
.7562191845,-2.9691709755,0.2078386572\C,1.5599721576,-3.0736953498,-1  
.1816648541\H,0.7948262645,-2.466273783,-1.6731108438\C,2.355152082,-3  
.9321253332,-1.9470310386\H,2.2024447323,-3.9737480783,-3.027698864\C,  
3.3512702459,-4.7081372261,-1.3179808738\C,3.4997881952,-4.6486770368,  
0.0891141638\H,4.2479843911,-5.2893718744,0.5654099288\C,2.7115795652,  
-3.788990592,0.8468135693\H,2.8326814319,-3.7536758613,1.9328103841\C,  
2.0482938131,1.7185146686,-1.9643701694\C,2.261558567,0.7768657879,-3.  
0071397281\C,3.076874805,1.9805060501,-1.0141277102\C,3.477680665,0.07  
12172794,-3.0469801055\C,4.2792353391,1.2533849544,-1.1072718257\C,4.4  
945733825,0.283003654,-2.0990670992\H,3.6407234059,-0.6618250107,-3.84  
36782795\H,5.0772013064,1.4445656352,-0.3827991017\C,-4.7369087789,-0.  
8195435597,0.6931860993\C,-4.537826833,-2.0140591489,1.4432609692\C,-5  
.6557166855,-0.81152729,-0.3917826998\C,-5.2856113377,-3.1581914719,1.  
1119830843\C,-6.3700413112,-1.9875611716,-0.6884082621\C,-6.2099747078  
,-3.1689935629,0.0527727501\H,-5.1345687451,-4.0725655106,1.6975221703  
\H,-7.0867297241,-1.9811536412,-1.5190740227\C,6.471561892,0.447055794  
4,3.6467137256\C,-5.9262541862,0.4416903752,-1.2264020011\H,-5.2512305  
359,1.2393781773,-0.8746956491\C,-3.5209461509,-2.1051461226,2.5833701  
715\C,-7.0237382506,-4.4172554384,-0.2784180632\H,-7.6432374913,-4.173  
1877999,-1.1619638875\C,-4.2158770631,-2.1917132012,3.9580690726\H,-3.  
4664302591,-2.2140303598,4.7709891074\H,-4.8813631361,-1.3273819762,4.  
1306389771\H,-4.8272153607,-3.1100065269,4.0365824584\C,-7.9797833122,  
-4.7851277943,0.8754585921\H,-7.4174531738,-5.0616199962,1.7863914564\  
H,-8.6427985758,-3.9389222712,1.1298347631\H,-8.6140449487,-5.64677277  
44,0.596693555\C,-6.1228218579,-5.6114891754,-0.6531726887\H,-6.736123  
7214,-6.4854136232,-0.9401342372\H,-5.4616993738,-5.3627216005,-1.5023  
868449\H,-5.4843163629,-5.9140655163,0.1971488135\C,-5.6222928279,0.21  
30692801,-2.7208247626\H,-6.3056766394,-0.5346191599,-3.1640838562\H,-  
5.7489248135,1.1559505354,-3.2842183512\H,-4.5849469333,-0.1344435833,

-2.8599188053\C,-7.3680880646,0.9508682015,-1.0162300249\H,-7.53302130  
51,1.8865106588,-1.581699156\H,-8.1126031613,0.210924202,-1.3636237768  
\H,-7.5665639529,1.1564516983,0.0511916684\C,5.8027853019,-0.501743646  
8,-2.1513253652\H,6.4142547775,-0.1669043624,-1.2918046221\C,1.2213660  
815,0.5997127905,-4.1121362733\H,0.2288709909,0.7475822517,-3.65416752  
49\C,2.8926019187,3.020767157,0.0987616816\H,2.230181563,3.8066744547,  
-0.3030957283\C,5.5627886873,-2.0170331052,-1.9929210007\H,6.522147160  
2,-2.5644570481,-1.9516058133\H,5.0022642658,-2.2390671894,-1.06881788  
92\H,4.9816359837,-2.4207866373,-2.8415804923\C,6.5957508876,-0.195014  
7189,-3.438059413\H,6.0350286918,-0.5161353575,-4.3352630393\H,6.79781  
50856,0.8868263987,-3.5340071871\H,7.5645579007,-0.7276734727,-3.43770  
41739\C,2.1812295914,2.4169618582,1.3290392258\H,1.2592905324,1.886559  
3135,1.0432300482\H,2.8408106451,1.6979512039,1.8441487437\H,1.9110320  
851,3.2092564923,2.0507796017\C,4.2021359121,3.707586949,0.5272782414\  
H,4.7538879024,4.1133915127,-0.3396275041\H,3.9764228153,4.5463539771,  
1.2103988693\H,4.8740046086,3.0188141342,1.0716100362\C,1.4172451543,1  
.6791888524,-5.20017129\H,1.3547535582,2.6962699586,-4.776169885\H,2.4  
056771209,1.5741211249,-5.6856870536\H,0.6400159387,1.588719816,-5.981  
5245984\C,1.2100427034,-0.8028408804,-4.7423930249\H,0.340081902,-0.90  
26161194,-5.4148434904\H,2.1171165546,-0.9953687815,-5.3452337014\H,1.  
1280854042,-1.5881829772,-3.9731513554\C,-2.5384364319,-3.2782505408,2  
.3883038094\H,-3.0439234943,-4.2561063399,2.4899725212\H,-2.0700343607  
, -3.2256008519,1.3927876061\H,-1.7407877482,-3.2387005297,3.1531342068  
\H,-2.926327029,-1.1774088356,2.5688590157\O,4.2059095489,-5.531761776  
7,-1.9685266888\C,4.1113967277,-5.6398994716,-3.3960349852\H,4.2739528  
946,-4.6606635828,-3.8826299401\H,4.9092933226,-6.3355295592,-3.694729  
8871\H,3.1309721372,-6.0493064371,-3.7014678525\F,6.6139143214,0.58205  
87208,4.9852831732\F,7.4954630333,-0.3295020541,3.2074862648\F,6.66806  
39865,1.6823771005,3.100737966\Version=ES64L-G09RevD.01\State=1-A\HF=  
-3628.1019632\RMSE=2.494e-09\RMSEF=3.804e-06\Dipole=3.1436145,-1.479848  
4,2.8441996\Quadrupole=-14.6152558,9.3672879,5.2479679,-17.1336812,-17  
.1768107,6.0234943\PG=C01 [X(C66H71F3N1O5P1)]\@

## Solution Phase pch3-pome-ketimine/TRIP

### E-configuration

E-3b/1c (Type I; conf0)

1\1\GINC-WORKER0\FOpt\RTPSSTPSS\def2SVP/W06\C66H74N1O5P1\JHIOE\28-Jul-  
2016\0\#p tpsstps/def2svp/w06 densityfit empiricaldispersion=gd3 opt  
scrf=(smd,solvent=ch2cl2,read)\title\0,1\P,0.1948932997,-0.40821451  
76,-1.3303475414\O,-1.2473037651,0.2949421709,-1.8172980485\O,0.709935  
3753,0.7724406289,-0.2249544277\O,1.063304959,-0.4639321415,-2.5528986  
889\O,-0.0600579769,-1.6053113179,-0.4214167049\C,-1.7616208812,2.1146  
662772,-0.3452925506\C,-2.1028496102,0.8812493423,-0.9097676001\C,-3.3  
540584292,0.2305215025,-0.6696879229\C,-4.2501535004,0.844565832,0.194  
3681028\H,-5.2248731212,0.381030359,0.3786540793\C,-3.9256861477,2.051  
169493,0.8778492006\C,-2.6553950072,2.6899704373,0.6316308381\C,-2.320  
8488981,3.8419067261,1.4069183808\H,-1.3436712368,4.3126955947,1.26795  
87056\C,-3.2056216412,4.3583844348,2.3424146329\H,-2.9200580192,5.2370  
556574,2.931117184\C,-4.4747578649,3.7542227496,2.5490481185\H,-5.1675  
234241,4.1767576299,3.2848766157\C,-4.8217464093,2.6197874132,1.832735  
6361\H,-5.7863774115,2.1275548237,2.0004032537\C,-0.4865378704,2.78591  
3504,-0.7287323613\C,0.7248894906,2.098506039,-0.6038371998\C,1.999656  
0625,2.7288029482,-0.7607129829\C,2.0217989616,4.0666997296,-1.1288834  
07\H,2.9825410839,4.5820096262,-1.2303619555\C,0.8233531325,4.78829240

11,-1.4029603529\C,-0.4533193294,4.1420842829,-1.2183905404\C,-1.63388  
39699,4.8689513392,-1.5603703987\H,-2.6077920606,4.3798166052,-1.46466  
77924\C,-1.5610018487,6.1728446696,-2.0281842444\H,-2.4801347052,6.706  
3434869,-2.2945806484\C,-0.3046574644,6.8205175169,-2.171558744\H,-0.2  
613077215,7.8533324934,-2.5340722626\C,0.862355231,6.1371601897,-1.867  
7906024\H,1.8389678688,6.6188270535,-1.9924896323\C,-2.260375236,-0.49  
34670309,4.170384606\C,-1.6653366089,-1.5735249435,4.8553909679\H,-2.1  
565527854,-1.9846703866,5.7442703804\C,-0.4570051391,-2.1292083242,4.4  
22069702\H,-0.0243241739,-2.9687764081,4.974888459\C,0.1747422757,-1.6  
438749343,3.252983637\C,-0.4131922468,-0.5541131816,2.566615521\H,0.07  
1568861,-0.1280426677,1.6851977832\C,-1.5999496783,0.0123858968,3.0291  
86409\H,-2.0269481169,0.8632049265,2.4892881156\C,1.4288470499,-2.2545  
628936,2.7859467412\C,2.4091100418,-2.7821261063,3.7896828878\H,3.4407  
43314,-2.7063186031,3.4095946317\H,2.2070475375,-3.846182757,4.0109024  
695\H,2.3203635608,-2.2181636803,4.7299465036\N,1.6726934681,-2.280870  
7513,1.4916107422\H,0.9249944769,-1.9098233283,0.8117680807\C,2.809103  
8169,-2.7903823301,0.799067688\C,3.2551678801,-2.0669454559,-0.3297543  
625\H,2.779704522,-1.1235627466,-0.6082975101\C,4.3363026771,-2.527323  
0513,-1.0723811092\H,4.6963367839,-1.9629540267,-1.9361717157\C,5.0067  
609196,-3.713954059,-0.7029811765\C,4.5434321595,-4.4566417852,0.40407  
03229\H,5.0206473307,-5.3956999794,0.6938332458\C,3.4453414566,-3.9982  
230092,1.1424439946\H,3.0740902957,-4.6098975434,1.9676518669\C,3.2542  
056842,1.9572954512,-0.4794618026\C,4.0813506823,1.5133006293,-1.54495  
58021\C,3.604121676,1.6596436977,0.8672466939\C,5.2510909639,0.7938451  
083,-1.2365874637\C,4.7752609106,0.9234966837,1.1198410275\C,5.6102948  
301,0.4728515044,0.082368644\H,5.8884569124,0.4385806827,-2.054823788\  
H,5.0348713223,0.6853269591,2.1551531307\C,-3.6863961782,-1.0567856823  
, -1.361555962\C,-3.7701780139,-2.2672167926,-0.6214539611\C,-3.9391510  
177,-1.0611676515,-2.7619226209\C,-4.1362862981,-3.4493898844,-1.29442  
1071\C,-4.2926036755,-2.2693824965,-3.3869532405\C,-4.4003468074,-3.47  
6279113,-2.6726944437\H,-4.2079893463,-4.3861082551,-0.7283600615\H,-4  
.4916323202,-2.2672330458,-4.4652363317\C,-3.56504265,0.1108081709,4.6  
259709199\C,-3.8613365483,0.2123709532,-3.6058944721\H,-3.5667499089,1  
.0424945983,-2.9421635489\C,-3.453517095,-2.326648317,0.8738556857\C,-  
4.7852016608,-4.7768258054,-3.3725678715\H,-4.7554188506,-5.5765586749  
, -2.6085861932\C,-4.7296255694,-2.5164444985,1.7191877016\H,-4.4813794  
583,-2.5320913452,2.7964093115\H,-5.4556150485,-1.7021574057,1.5471530  
636\H,-5.2301344826,-3.4720218014,1.4747324198\C,-3.7758214515,-5.1474  
395578,-4.4784276817\H,-3.7735268218,-4.3932797309,-5.2868148518\H,-2.  
7493979651,-5.2146077003,-4.0757365914\H,-4.0337544525,-6.1231696854,-  
4.929526217\C,-6.2219861453,-4.7152052462,-3.9310301759\H,-6.505490131  
, -5.6818343896,-4.3867705203\H,-6.951014053,-4.4853922274,-3.133400276  
5\H,-6.3138548562,-3.9353447149,-4.7094420566\C,-2.7849762053,0.101143  
0339,-4.7050080757\H,-3.0411713219,-0.6802670139,-5.4442507887\H,-2.69  
11851382,1.0589593402,-5.2496660575\H,-1.8028820508,-0.1409097435,-4.2  
656683975\C,-5.2382121213,0.5776071049,-4.1991717964\H,-5.17887123,1.5  
289860163,-4.759218233\H,-5.5980221361,-0.2017783154,-4.8959442482\H,-  
5.9954892819,0.6968859009,-3.4033701346\C,6.8678954953,-0.3522222233,0  
.3491224669\H,7.0233254216,-0.9849022928,-0.5458891006\C,3.7242550123,  
1.7900391602,-3.0069710391\H,2.6600724558,2.0817966069,-3.0324482781\C  
,2.7438671736,2.1628360427,2.0297250859\H,1.696519672,2.1784652495,1.6  
814639247\C,8.1032800914,0.5632797161,0.4924112704\H,9.0222098234,-0.0  
343835349,0.6381025827\H,8.2411682506,1.1907084888,-0.4063017084\H,7.9  
910860792,1.2370408845,1.3621763193\C,6.7319782836,-1.2928962883,1.559  
9698745\H,6.70395757,-0.7331554304,2.5127677066\H,5.8126458044,-1.9009  
903218,1.4931964481\H,7.5943417894,-1.9821189188,1.6081774195\C,2.7901

972682,1.2570550314,3.2721687633\H,2.5940185554,0.2045760688,3.0078849  
797\H,3.7692370098,1.3038011839,3.7831218283\H,2.0229707565,1.57461580  
01,4.0002899079\C,3.1275723849,3.6130841954,2.3986707895\H,3.027655104  
4,4.2879719499,1.5307944849\H,2.475922317,3.9957975694,3.2057405711\H,  
4.1748981895,3.6612199069,2.7499650993\C,4.5549508639,2.9662187784,-3.  
5623649028\H,4.4113227714,3.8829713523,-2.9642896198\H,5.6342792081,2.  
7240842638,-3.5554622756\H,4.2633367859,3.1902040365,-4.6051855459\C,3  
.8685982187,0.5435807554,-3.9014797752\H,3.521767318,0.7757073207,-4.9  
253701028\H,4.9191282888,0.2080699539,-3.9788905935\H,3.2497734297,-0.  
2808641568,-3.5124920828\C,-2.4055908081,-3.4077374802,1.2056168098\H,  
-2.791324434,-4.4275744349,1.0220856954\H,-1.4959222112,-3.2560499932,  
0.6022046622\H,-2.1289609957,-3.3453579118,2.2735585569\H,-3.008216265  
6,-1.3584636612,1.1540383296\O,6.0781059606,-4.0497147316,-1.462904458  
3\C,6.8378739837,-5.2146168604,-1.1147517287\H,6.2283123701,-6.1334062  
038,-1.2004777919\H,7.6656559302,-5.2558984737,-1.8381236474\H,7.24712  
0235,-5.1318221652,-0.09071486\H,-3.446766142,1.1890569522,4.837602745  
4\H,-3.9481224603,-0.3840633752,5.5334293385\H,-4.3288869086,0.0238017  
202,3.8318874593\Version=ES64L-G09RevD.01\State=1-A\HF=-3330.5921441\  
RMSD=5.481e-09\IRMSF=2.784e-06\Dipole=1.9307691,-2.481394,5.4486767\Qua  
drupole=4.1333329,6.5589654,-10.6922983,-30.3234262,0.6812034,-17.7192  
705\PG=C01 [X(C66H74N1O5P1)]\@

E-3b/1c (Type I; conf1)

1\1\GINC-LOGIN\FOpt\RTSPSS\def2SVP/W06\C66H74N1O5P1\JHIOE\28-Jul-20  
16\0\#p tpsstps/def2svp/w06 densityfit empiricaldispersion=gd3 opt s  
crf=(smd,solvent=ch2cl2,read)\title\0,1\P,0.196600203,-0.3637721536,  
-1.4349933359\O,-1.2279424538,0.3789203965,-1.9141450904\O,0.728492630  
5,0.7776727881,-0.2927199279\O,1.0699980138,-0.4096470994,-2.654035709  
3\O,-0.0925880224,-1.574672296,-0.5549419452\C,-1.7098974633,2.1805153  
657,-0.4142272802\C,-2.0741624234,0.9627554962,-0.9961821016\C,-3.3346  
811,0.3288835894,-0.7605361263\C,-4.2176261333,0.9470276058,0.11463406  
12\H,-5.1989240924,0.4966756571,0.296879787\C,-3.8712242203,2.13946231  
41,0.8126281431\C,-2.5908296706,2.7596580892,0.571142449\C,-2.23367962  
43,3.8960459986,1.3590844747\H,-1.2485910994,4.3511778516,1.2230844662  
\C,-3.1065995097,4.4160953744,2.303580422\H,-2.8043773454,5.2825776357  
,2.9019706784\C,-4.385080295,3.8308249565,2.507048775\H,-5.0680727403,  
4.255878752,3.2505230497\C,-4.7540248069,2.7114264956,1.7779443099\H,-  
5.7263531205,2.2336938469,1.9433528979\C,-0.4163908064,2.8266140639,-0  
.7782159255\C,0.777631719,2.1128564418,-0.6340940773\C,2.0663212074,2.  
7253644032,-0.7340718218\C,2.1241499349,4.0606521146,-1.1096584834\H,3  
.0971366999,4.5576653149,-1.1841279646\C,0.9475301778,4.8025729679,-1.  
4213669723\C,-0.3455971283,4.1839566524,-1.2574482195\C,-1.5057053638,  
4.9361569706,-1.6134491883\H,-2.4910805635,4.4683589879,-1.5281437637\  
C,-1.39780064,6.2370301083,-2.0828687178\H,-2.3013988817,6.7906455982,  
-2.3610045614\C,-0.1252417894,6.8552510864,-2.2139893204\H,-0.05445412  
95,7.8853446628,-2.5799590185\C,1.0225773513,6.1481038923,-1.891558645  
7\H,2.0109222288,6.6085486835,-2.0033587409\C,-2.2460194024,-0.4805270  
538,4.1158259731\C,-1.6414795589,-1.5599666943,4.7935194947\H,-2.11438  
98188,-1.96249048,5.6961390946\C,-0.4469816317,-2.1263230143,4.3355316  
995\H,-0.0072118462,-2.9656181807,4.8831183494\C,0.1602620772,-1.65225  
47163,3.1491739672\C,-0.4372035524,-0.562288916,2.4708433805\H,0.02894  
84483,-0.144515489,1.5757540624\C,-1.6088523054,0.0149071151,2.9568187  
425\H,-2.0435032238,0.8647917333,2.4213378319\C,1.3965548836,-2.274378  
6939,2.6505636233\C,2.3888603736,-2.8410422548,3.620858763\H,3.4098856  
746,-2.7955702502,3.2085382455\H,2.1578334024,-3.8996968071,3.83948892  
72\H,2.3462820501,-2.2831205973,4.5680280769\N,1.6174649946,-2.2818925

106,1.3530899595\H,0.8695638553,-1.8909609901,0.6838598494\C,2.7289987  
908,-2.818189921,0.6382717504\C,3.244398539,-2.0549513199,-0.431684820  
9\H,2.8514833369,-1.0566384381,-0.6389642202\C,4.2882093111,-2.5538873  
82,-1.2030686029\H,4.7047563421,-1.9636943917,-2.0229695068\C,4.842020  
0548,-3.8235222827,-0.9253497207\C,4.314407401,-4.5965375769,0.1314470  
593\H,4.7067796576,-5.5917583327,0.3536245238\C,3.258545255,-4.0939435  
531,0.9024024973\H,2.8286176677,-4.7201019166,1.6881769296\C,3.2917352  
996,1.9386354425,-0.3777810998\C,4.1941619536,1.5087497121,-1.38463392  
3\C,3.5402072445,1.6171591614,0.9889107977\C,5.3288040395,0.764753322,  
-1.0048833037\C,4.6768205667,0.8566511361,1.310899611\C,5.5798970566,0  
.409765401,0.3284069781\H,6.02588111,0.4234553615,-1.7793177561\H,4.86  
35921474,0.5999578619,2.3578567278\C,-3.6873001934,-0.9473185138,-1.46  
31467737\C,-3.7903034025,-2.1633089208,-0.730551384\C,-3.9382536786,-0  
.9386238548,-2.8618126758\C,-4.1790323069,-3.3333037119,-1.4074367487\  
C,-4.3129279086,-2.1395932426,-3.4933771786\C,-4.4456144373,-3.3464322  
819,-2.7878616019\H,-4.2642940187,-4.2669397863,-0.839577199\H,-4.5119  
128235,-2.1354572311,-4.5722787855\C,-3.5367582233,0.1343055978,4.5960  
139171\C,-3.8406819501,0.3382482184,-3.6982395765\H,-3.5301365857,1.15  
89772168,-3.0300554827\C,-3.4711313925,-2.2389141395,0.7634716401\C,-4  
.8508890106,-4.6312007546,-3.5045956302\H,-5.0111190429,-4.3715066414,  
-4.5679780987\C,-4.7477538481,-2.4151384405,1.6108094652\H,-4.49665469  
47,-2.4433499903,2.6871571318\H,-5.4616149569,-1.5884334343,1.44722982  
98\H,-5.2636732747,-3.3608387114,1.3599918665\C,-6.1772046659,-5.19735  
13892,-2.9572435265\H,-6.0783096506,-5.4949595398,-1.8969782843\H,-6.9  
878357171,-4.4499087512,-3.0261087679\H,-6.4842042661,-6.0914843264,-3  
.5303136731\C,-3.7287692534,-5.6877753497,-3.4459763369\H,-4.011098481  
, -6.5885738146,-4.0214577518\H,-2.7871689344,-5.2911892369,-3.86584145  
22\H,-3.5299026414,-6.0012248813,-2.4045614115\C,-2.7697430926,0.21624  
09444,-4.801402192\H,-3.0411102154,-0.5555633136,-5.545283198\H,-2.661  
9028645,1.1760265129,-5.3399464563\H,-1.7903191069,-0.0449299216,-4.36  
70722562\C,-5.2128661641,0.7308053746,-4.285152998\H,-5.1382742169,1.6  
841879957,-4.8399145857\H,-5.5881366909,-0.0380565609,-4.9854132677\H,  
-5.9655759725,0.8587241482,-3.4864038341\C,6.8014636178,-0.4333571542,  
0.6876158126\H,7.1385540015,-0.9186463137,-0.2481363923\C,3.9631537481  
,1.8232318961,-2.8637578041\H,2.9342098805,2.2094824129,-2.9621162329\  
C,2.6167423973,2.1323277484,2.0973638459\H,1.5856386397,2.1164139845,1  
.7029277388\C,7.9548043004,0.4588567438,1.1952313453\H,8.855523919,-0.  
1457423495,1.4092657313\H,8.2257214433,1.2255261559,0.4474726407\H,7.6  
652609754,0.9812361919,2.1261337009\C,6.4794504302,-1.5504642192,1.699  
2022491\H,6.2173263441,-1.1394602721,2.6912343168\H,5.6358951415,-2.17  
25467339,1.3529597882\H,7.3566666684,-2.2086436506,1.8361930661\C,2.62  
49634398,1.2693962055,3.3704794326\H,2.4675757687,0.2033517142,3.13847  
98684\H,3.5764332314,1.3609671674,3.9254842549\H,1.8154144259,1.591947  
2252,4.0487062443\C,2.956438474,3.5995626098,2.4433059574\H,2.88648626  
07,4.2500730301,1.5547923502\H,2.2600802044,3.9907580159,3.2077890713\  
H,3.9844889135,3.6756324953,2.8428576066\C,4.9309670572,2.9246660264,-  
3.3447553065\H,4.8300352859,3.843061455,-2.7394065611\H,5.9814084464,2  
.5860601617,-3.2711308254\H,4.7318146428,3.1862731113,-4.4004533192\C,  
4.0564776913,0.5694684182,-3.7555217252\H,3.8164058703,0.8347842297,-4  
.8018224424\H,5.0722844161,0.1333387573,-3.7514836196\H,3.3314461068,-  
0.1910384373,-3.4227280338\C,-2.4405916823,-3.3401128944,1.0835948045\  
H,-2.845131005,-4.3517524036,0.8949450424\H,-1.5317335287,-3.200398999  
9,0.4762024116\H,-2.1574123102,-3.2899057519,2.1505244245\H,-3.0095001  
281,-1.2805576948,1.0502092309\O,5.8690009895,-4.2078761319,-1.7224609  
445\C,6.4705973144,-5.4911954633,-1.5088545647\H,5.735209143,-6.305727  
7159,-1.6449238206\H,7.2605092009,-5.5805795083,-2.2692725361\H,6.9206

073738,-5.5607988766,-0.5009882931\H,-3.4056983261,1.2118186468,4.8041  
365895\H,-3.9062102289,-0.3563047171,5.5113938938\H,-4.3161527186,0.05  
26165691,3.8165338025\\Version=ES64L-G09RevD.01\State=1-A\HF=-3330.592  
0057\RMSE=3.639e-09\RMSF=4.042e-06\Dipole=1.7606594,-2.6079741,5.38762  
1\Quadrupole=1.243878,10.3042937,-11.5481716,-28.9383967,-1.5797609,-1  
5.6073215\PG=C01 [X(C66H74N1O5P1)]\@

E-3b/1c (Type I; conf2)

1\1\GINC-WORKER0\FOpt\RTPSSTPSS\def2SVP/W06\C66H74N1O5P1\JHIOE\28-Jul-  
2016\0\#p tpsstps/def2svp/w06 densityfit empiricaldispersion=gd3 opt  
scrf=(smd,solvent=ch2cl2,read)\title\0,1\P,0.2205400422,-0.61428656  
13,-1.2790610124\O,-1.1952749759,0.0670446233,-1.8649746551\O,0.752775  
6867,0.6515242201,-0.2752130687\O,1.1091073526,-0.8072870645,-2.472582  
2265\O,-0.0864452607,-1.7093049217,-0.2635110166\C,-1.6745714907,2.047  
4773949,-0.611089989\C,-2.0527080074,0.7768138241,-1.0534391119\C,-3.3  
396124893,0.2105830157,-0.7879417281\C,-4.2264161326,0.948003082,-0.01  
37161048\H,-5.2247147226,0.5454020426,0.188666585\C,-3.8623671944,2.2  
006798927,0.5586037298\C,-2.5610127877,2.7569260199,0.2784706036\C,-2.  
1886888191,3.967902031,0.9371836618\H,-1.1895096506,4.3804704795,0.771  
0701432\C,-3.0645191717,4.6135687054,1.7975649046\H,-2.750696451,5.535  
6657747,2.2990691987\C,-4.3607609866,4.0850915053,2.0405850206\H,-5.04  
51232236,4.6079914984,2.7174505674\C,-4.7468412549,2.8996091218,1.4349  
086302\H,-5.7345671965,2.4680478379,1.6332692707\C,-0.3688235976,2.629  
5143307,-1.0331263146\C,0.8182461666,1.9323218643,-0.784913686\C,2.110  
5589447,2.5193721308,-0.9536699132\C,2.1781869651,3.7947668211,-1.5005  
782342\H,3.1547156644,4.2738782371,-1.6265973226\C,1.0110206403,4.4959  
681499,-1.9187711611\C,-0.2866458388,3.9119830716,-1.6855247647\C,-1.4  
391440794,4.6182213846,-2.1454683229\H,-2.4284754676,4.172512231,-2.00  
65245043\C,-1.3188681949,5.8451535166,-2.7814361076\H,-2.2169165306,6.  
3627857609,-3.136163894\C,-0.0410252583,6.4327199357,-2.9837812835\H,0  
.0393644596,7.404746259,-3.4825738136\C,1.0993991574,5.7673578372,-2.5  
623379134\H,2.0919800072,6.2023544335,-2.7261835276\C,-2.4296142075,-0  
.0894245943,4.1929824366\C,-1.8410980962,-1.0811357618,5.0051713919\H,  
-2.3401874266,-1.3861341727,5.9316926772\C,-0.6290880105,-1.6821089884  
,4.6497585598\H,-0.2015199646,-2.4512862089,5.3001128649\C,0.014202405  
1,-1.3358092632,3.4385839042\C,-0.5679913122,-0.3341263236,2.623278907  
3\H,-0.0754608528,-0.0140227738,1.7016757045\C,-1.7593740771,0.2799873  
529,3.0057093105\H,-2.1835141474,1.0609468266,2.3672714372\C,1.2714705  
697,-1.9979117648,3.0592274211\C,2.2205238323,-2.4571458555,4.12417342  
16\H,3.2575199982,-2.4641310335,3.7525164562\H,1.9698970004,-3.4844649  
591,4.4468750956\H,2.1457993295,-1.7992993073,5.0028018938\N,1.5466200  
691,-2.137900092,1.7801758937\H,0.8203159997,-1.8368702966,1.044410175  
5\C,2.6893342566,-2.7243802875,1.1624977499\C,3.213746799,-2.069479414  
6,0.0260220717\H,2.8067668444,-1.1077832817,-0.2958773086\C,4.28107989  
74,-2.6268979422,-0.6667428381\H,4.7019010916,-2.1211000473,-1.5384894  
604\C,4.8544357645,-3.8455003521,-0.2402622488\C,4.3208307785,-4.51102  
01928,0.8834150107\H,4.7291336354,-5.4667944725,1.2206249579\C,3.23645  
68203,-3.9526172412,1.5735333239\H,2.7996389317,-4.5015099448,2.411540  
9451\C,3.3490146203,1.8163003385,-0.4823332295\C,4.2919991135,1.309096  
355,-1.4149695989\C,3.6081477112,1.7235085319,0.9146202383\C,5.5014702  
212,0.7670143044,-0.9363108392\C,4.8298599551,1.1723798946,1.339915955  
1\C,5.8015876757,0.7077653534,0.4348955453\H,6.231017787,0.3871726868,  
-1.6607487513\H,5.0488422672,1.1187985455,2.4122648864\C,-3.7151342066  
,-1.1264642175,-1.3495096642\C,-3.9253814855,-2.2322841591,-0.48148745  
1\C,-3.8913443082,-1.2836788901,-2.7536404924\C,-4.3378610954,-3.46110  
25861,-1.0335259635\C,-4.2968853963,-2.5328618415,-3.2533981603\C,-4.5

339041754,-3.6350828255,-2.4122692947\H,-4.5042312583,-4.3160926909,-0.3664539632\H,-4.4387503484,-2.6465812079,-4.3346920712\C,-3.7381258347,0.5635342706,4.5619837596\C,-3.690433735,-0.128872606,-3.7371286634\H,-3.3645997613,0.7553539387,-3.1646694373\C,-3.6839411901,-2.1419513434,1.0264581315\C,-4.9757392064,-4.9812435263,-2.9805863381\H,-5.1242168463,-5.6634763791,-2.1224502646\C,-4.996880075,-2.2588370859,1.8256241392\H,-4.7989173056,-2.1736938052,2.9098785524\H,-5.7112923742,-1.4643443086,1.544474182\H,-5.4889708898,-3.233435464,1.6495527182\C,-3.8870275591,-5.595457241,-3.8848785619\H,-3.6960060481,-4.9572722932,-4.7672106623\H,-2.9336091945,-5.7127351416,-3.3395286713\H,-4.1993146969,-6.5913210077,-4.249847017\C,-6.319541464,-4.871498972,-3.7298628937\H,-6.6476242643,-5.8644495478,-4.0882909689\H,-7.110991983,-4.4642476069,-3.0752844574\H,-6.2331400193,-4.208137822,-4.6101089318\C,-2.5853329122,-0.4395262023,-4.7672334561\H,-2.8606984228,-1.2951902948,-5.4114926132\H,-2.4201523544,0.4339075533,-5.424760595\H,-1.6336610284,-0.6733589872,-4.2620182102\C,-5.0154740031,0.2492644131,-4.4320091104\H,-4.8675970624,1.1207064203,-5.0961881568\H,-5.3998577225,-0.5837662144,-5.0489412979\H,-5.7933647199,0.5109269469,-3.6920786758\C,7.1293562309,0.1523336396,0.9480430257\H,7.1832636752,0.4049870966,2.0239749963\C,4.0335841141,1.354755148,-2.9225568329\H,2.9875151112,1.6740907949,-3.0682771546\C,2.6204487832,2.2847266722,1.9419022536\H,1.6053925174,2.1626020495,1.5270613339\C,7.1911092944,-1.3849767363,0.8341930986\H,8.1409025841,-1.7659936587,1.2534643575\H,6.3599744386,-1.8598015566,1.3837097233\H,7.1296123887,-1.7134157781,-0.2185000904\C,8.3401423512,0.8075365146,0.2547268456\H,8.381221807,0.5483472604,-0.8191112326\H,8.3016335538,1.9085184647,0.3378382069\H,9.2831771713,0.4615170332,0.7158617922\C,2.6435504404,1.5452304005,3.2911624126\H,2.5606275237,0.4538347526,3.1540853185\H,3.5695770833,1.7472903507,3.8596119293\H,1.7952378059,1.8757591726,3.9162894994\C,2.8546867322,3.7977164264,2.147265128\H,2.7763482774,4.3484727119,1.1939422403\H,2.1072462142,4.2168874008,2.8459713455\H,3.8606459231,3.982561457,2.5670858892\C,4.9466540132,2.3917193531,-3.6091493005\H,4.8193002715,3.3964029384,-3.1684198589\H,6.0115610104,2.1111029183,-3.5073006262\H,4.7154745552,2.4591850721,-4.6882412625\C,4.1699810898,-0.0318998655,-3.5816414678\H,3.9471321364,0.0417953599,-4.6621992984\H,5.1937922744,-0.4368229755,-3.4824559322\H,3.4518701217,-0.7393216224,-3.1365598881\C,-2.6446715439,-3.178531758,1.4990783338\H,-3.0131297261,-4.2138331882,1.3763706685\H,-1.7075237927,-3.0653768629,0.9289560196\H,-2.4204275775,-3.02885406,2.5709668993\H,-3.2568604783,-1.1481929937,1.2352116173\O,5.9138744238,-4.2828109064,-0.9650322913\C,6.5625338911,-5.5010408691,-0.5787311357\H,5.8685373584,-6.3598439283,-0.6367800154\H,7.3820203358,-5.6437541357,-1.2985954882\H,6.9788896118,-5.4261441491,0.4429976942\H,-3.6165397676,1.6574887276,4.6629077309\H,-4.4900136769,0.3981245269,3.7687958691\H,-4.1379895281,0.1676153641,5.5098033636\Version=ES64L-G09RevD.01\State=1-A\HF=-3330.5915421\RMSE=4.957e-09\RMSEF=3.892e-06\Dipole=1.6000246,-1.8257262,5.7196713\Quadrupole=1.9431748,3.6339953,-5.5771701,-27.0540259,2.1495435,-19.5707247\PG=C01 [X(C66H74N1O5P1)]\@

E-3b/1c (Type I; conf3)

1\1\GINC-LOGIN\FOpt\RTPSSSTPSS\def2SVP/W06\C66H74N1O5P1\JHIOE\05-Aug-2016\0\#p tpsstps/def2svp/w06 densityfit empiricaldispersion=gd3 opt s crf=(smd,solvent=ch2cl2,read)\title\0,1\P,-0.1452988789,-0.4173391924,-1.1411846928\O,-1.6257401335,0.2988689443,-1.4631295468\O,0.5194320399,0.7702197866,-0.1226323043\O,0.5687390587,-0.5045289422,-2.4575723757\O,-0.3110608588,-1.5928743459,-0.1844124839\C,-1.9379952807,2.1299878965,0.0430317782\C,-2.3561447228,0.8939118153,-0.4570628897\C,-3.56



1074698,0.2467992275,-0.0377949751\C,-4.3249306134,0.8708394706,0.9400  
932395\H,-5.2623313007,0.4083606586,1.2666958758\C,-3.9058390314,2.083  
0424077,1.5608361739\C,-2.6849578787,2.7182632954,1.1273665843\C,-2.24  
23536708,3.8794829636,1.8306030334\H,-1.2969740609,4.349116217,1.54492  
74521\C,-2.9807853271,4.4064220415,2.8800124154\H,-2.6137727384,5.2924  
333381,3.4096844107\C,-4.2033315867,3.802565416,3.2788509671\H,-4.7799  
668206,4.231739938,4.1054330186\C,-4.6513743254,2.6609607909,2.6326609  
48\H,-5.5799923666,2.1707579123,2.9466872203\C,-0.7194737591,2.7838984  
317,-0.5150291855\C,0.4956233801,2.0908269434,-0.5208091688\C,1.743403  
3675,2.7121221392,-0.8408560698\C,1.7198853032,4.0300828094,-1.2773883  
792\H,2.6609810436,4.5359177441,-1.5172649843\C,0.4975661303,4.7456100  
254,-1.4346600644\C,-0.7447733766,4.122874213,-1.047892875\C,-1.957221  
1562,4.849797466,-1.2479683889\H,-2.9103000697,4.378037708,-0.99122456  
47\C,-1.94339365,6.131536172,-1.7785701535\H,-2.887706568,6.6652109303  
, -1.9325768338\C,-0.7162485688,6.7543820911,-2.1318622552\H,-0.7187621  
913,7.7687513883,-2.5455765779\C,0.4780652723,6.0712898494,-1.96438917  
12\H,1.4302005991,6.5350113783,-2.246607852\C,-1.8589515779,-0.4489404  
53,4.7054072366\C,-1.137286395,-1.4964811609,5.314976707\H,-1.47439095  
76,-1.8947615138,6.2784869884\C,0.002973159,-2.0367943834,4.7114459881  
\H,0.5359094013,-2.8536451889,5.2076183188\C,0.434331569,-1.5687556357  
,3.4483979262\C,-0.2794425402,-0.5089901523,2.8369187684\H,0.051781008  
2,-0.0958868495,1.8810546288\C,-1.3952173774,0.0420779779,3.4648267882  
\H,-1.92389244,0.8683277336,2.9795071458\C,1.607415777,-2.1771266551,2  
.8019178227\C,2.7312362269,-2.7064808149,3.6411469034\H,3.6856707035,-  
2.6663543669,3.0921362721\H,2.5441634371,-3.7598381485,3.9193265902\H,  
2.8120165414,-2.1221770435,4.5699300458\N,1.6515314442,-2.2110138559,1  
.4877495102\H,0.8114568569,-1.8503517548,0.9175008459\C,2.6638486529,-  
2.7480428534,0.6380880628\C,3.0226317996,-1.9992562859,-0.4968649749\H  
,2.5959731303,-1.0066117555,-0.6622814244\C,3.9558602416,-2.4980875579  
, -1.4090527296\H,4.2273524389,-1.8860705307,-2.2699904025\C,4.54122121  
54,-3.7634169936,-1.1958372834\C,4.1656423088,-4.5227420487,-0.0637718  
842\H,4.6096658761,-5.5125727669,0.0788226373\C,3.232549926,-4.0236224  
36,0.8433345627\H,2.9197367793,-4.640177373,1.6896597586\C,3.027856199  
6,1.9654543862,-0.6364485365\C,3.778648967,1.497247163,-1.7453000813\C  
,3.4929076369,1.7344559567,0.6913373065\C,4.9950925744,0.8269002283,-1  
.5049734411\C,4.7043117219,1.0473907183,0.8751699643\C,5.4711699329,0.  
580947386,-0.2087996951\H,5.5809607966,0.4620787882,-2.3570009971\H,5.  
0638657239,0.8684636757,1.8931288629\C,-3.9783383978,-1.0516500767,-0.  
6582795289\C,-3.9867163109,-2.2449404973,0.1143153349\C,-4.3830631482,  
-1.0876201989,-2.022800716\C,-4.4353331765,-3.4381444307,-0.4854653872  
\C,-4.8134962722,-2.306281505,-2.574806526\C,-4.85515895,-3.4943878452  
, -1.8233971005\H,-4.4511521329,-4.3601736769,0.108479435\H,-5.13154677  
5,-2.3261642334,-3.6239875774\C,-3.0962724468,0.1347708652,5.34007201\  
C,-4.3959292096,0.1630793642,-2.9040798741\H,-4.0119760983,1.006159801  
8,-2.3060257085\C,-3.506970253,-2.2828018621,1.5665103904\C,-5.3302909  
462,-4.8065298242,-2.441481617\H,-5.2898120783,-5.5727596615,-1.644436  
3184\C,-4.680007758,-2.4932930155,2.54533517\H,-4.3173922646,-2.501009  
7724,3.5896868275\H,-5.4346958186,-1.6923105496,2.4499136887\H,-5.1862  
057786,-3.4584717536,2.3573643811\C,-4.3976822811,-5.2665504295,-3.581  
0262005\H,-4.4037870693,-4.5438762803,-4.417703531\H,-3.3557271788,-5.  
3677677702,-3.2284831685\H,-4.7227665913,-6.2455489734,-3.9790428388\C  
, -6.7914673362,-4.7124455655,-2.9260338238\H,-7.1353813507,-5.68757718  
97,-3.3172125752\H,-7.4672795509,-4.4146354339,-2.1043028648\H,-6.8963  
349129,-3.9693108319,-3.7379736713\C,-3.4686066513,0.0102016019,-4.127  
2497242\H,-3.8197391376,-0.7904992127,-4.804491553\H,-3.4433413684,0.9  
512615056,-4.7072991061\H,-2.4391881924,-0.2256687605,-3.8102293344\C,

-5.8323837831,0.5315213642,-3.3310009702\H,-5.8321736663,1.4674071847,  
-3.9196235504\H,-6.283232599,-0.2605232714,-3.9569342723\H,-6.48414179  
37,0.6805020427,-2.4512105252\C,6.7816685314,-0.17027876,0.0128761132\  
H,7.0643973245,-0.6150318677,-0.9603433363\C,3.3036699027,1.7049206744  
,-3.1845420662\H,2.2500039727,2.0295924974,-3.1391200128\C,2.717285726  
,2.2659182766,1.9000958089\H,1.6429252782,2.2080472667,1.6536811695\C,  
7.9101284224,0.7962361774,0.431494545\H,8.868432572,0.2560730133,0.542  
8013888\H,8.0512348786,1.5947601194,-0.3187029393\H,7.6769007312,1.277  
9376838,1.3993337347\C,6.6359171379,-1.323082793,1.0265812805\H,6.4179  
160365,-0.9456749816,2.0424712558\H,5.8218755571,-2.009853926,0.736479  
2568\H,7.5731894235,-1.9059911431,1.0838267895\C,2.9278097238,1.443088  
8688,3.1830514131\H,2.781407404,0.3653988639,3.0004831676\H,3.94094473  
95,1.5824481907,3.6024217271\H,2.2051910812,1.75851492,3.9562760659\C,  
3.0525835917,3.7527863131,2.1513700157\H,2.8422102178,4.3686563821,1.2  
600702605\H,2.4532053932,4.1500676452,2.991195818\H,4.1221353084,3.872  
604777,2.4046456429\C,4.1164488981,2.8212145566,-3.8733927325\H,4.0627  
755399,3.7678592151,-3.3072443994\H,5.1824638922,2.5383480997,-3.95738  
44798\H,3.7333103745,3.009128106,-4.8934103203\C,3.3326078547,0.405141  
1631,-4.0124869241\H,2.9331906949,0.5974039939,-5.0254222804\H,4.35929  
35304,0.013204118,-4.1334438337\H,2.6999645623,-0.3630653367,-3.539488  
1262\C,-2.4070629497,-3.3419689632,1.7827216587\H,-2.79357878,-4.36949  
6858,1.6512308235\H,-1.5784714714,-3.1805322865,1.0739561638\H,-2.0069  
675443,-3.2669389577,2.8102394155\H,-3.0545812738,-1.3042053392,1.7940  
208662\O,5.4613670467,-4.3270139688,-2.0159649291\C,5.8937704815,-3.59  
36130227,-3.1703638684\H,6.3743969451,-2.640340909,-2.8804323873\H,6.6  
302896442,-4.2370516801,-3.6738271265\H,5.0506168411,-3.3901381758,-3.  
8561792438\H,-2.9890986139,1.2254970268,5.4814147249\H,-3.3091250085,-  
0.326593462,6.3183058945\H,-3.9738742501,-0.0174055902,4.6849535248\|V  
ersion=ES64L-G09RevD.01\State=1-A\HF=-3330.5930698\RMSD=3.593e-09\RMSF  
=3.536e-06\Dipole=2.2998722,-1.2365404,4.4287694\Quadrupole=2.923212,-  
6.398238,3.4750259,-16.2848653,-9.5597335,-12.2631069\PG=C01 [X(C66H74  
N1O5P1)]\@

E-3b/1c (Type I; conf4)

1\1\GINC-LOGIN\FOpt\RTPSSTPSS\def2SVP/W06\C66H74N1O5P1\JHIOE\05-Aug-20  
16\0\#p tpsstps/def2svp/w06 densityfit empiricaldispersion=gd3 opt s  
crf=(smd,solvent=ch2cl2,read)\title\0,1\P,-0.1385261735,-0.387500742  
9,-1.1815605641\O,-1.5852565687,0.3828448735,-1.5302889578\O,0.5399402  
35,0.7650948018,-0.1312304101\O,0.6019516429,-0.4837936417,-2.48297219  
11\O,-0.3651919429,-1.5687135004,-0.2444803586\C,-1.8820287632,2.20082  
28428,-0.0054302361\C,-2.325817833,0.9868730035,-0.5371655448\C,-3.564  
9599188,0.3762712019,-0.1661903441\C,-4.3400799634,1.0148437628,0.7932  
739973\H,-5.3042142637,0.5820932407,1.0805372374\C,-3.8986621282,2.201  
0969549,1.4473697411\C,-2.641188419,2.7976261622,1.0663212908\C,-2.178  
7739283,3.9278058128,1.8064356027\H,-1.2068420434,4.3649574641,1.56071  
13011\C,-2.9316796029,4.4633506135,2.8411477573\H,-2.5496195973,5.3243  
95058,3.4004870664\C,-4.1891007689,3.8997617846,3.1872039742\H,-4.7768  
528656,4.3358129535,4.0022570315\C,-4.6578257107,2.7882803541,2.504632  
6895\H,-5.6141136011,2.3283310624,2.7787350393\C,-0.6275677069,2.82431  
82899,-0.5159340221\C,0.5654165833,2.0934759318,-0.502973715\C,1.83989  
16719,2.6847012285,-0.7701160818\C,1.8705131808,4.0155976284,-1.164996  
6056\H,2.8342413484,4.49692489,-1.3614219645\C,0.677003866,4.775323690  
7,-1.3339862033\C,-0.5952649166,4.1776057308,-1.0112396348\C,-1.778098  
3762,4.946930163,-1.2289053418\H,-2.7528304797,4.4940334441,-1.0254698  
136\C,-1.7078659614,6.2459725593,-1.7103205036\H,-2.6302821245,6.81258

44373,-1.8789152726\C,-0.4512940769,6.8446172812,-1.9955455378\H,-0.40  
96790968,7.8734642051,-2.3694643302\C,0.715660225,6.119216202,-1.81418  
06172\H,1.69042195,6.5626592171,-2.0473660041\C,-2.0010927402,-0.42862  
09939,4.6453263868\C,-1.3110958096,-1.492662157,5.2627704579\H,-1.6731  
29163,-1.8886044167,6.2181383422\C,-0.1710736434,-2.0523419913,4.67666  
44717\H,0.3376631912,-2.8808684004,5.1787480997\C,0.2910904109,-1.5881  
752631,3.4229733722\C,-0.3910210767,-0.5120389107,2.8039078269\H,-0.03  
59749487,-0.1031063989,1.8546665319\C,-1.5060111491,0.0585778802,3.415  
3867898\H,-2.0104644471,0.8972251273,2.925712576\C,1.464974997,-2.2154  
867251,2.7970208084\C,2.5572809528,-2.7765914707,3.6571164055\H,3.5261  
108462,-2.7468227165,3.133082769\H,2.3440268276,-3.8300154108,3.915795  
6003\H,2.6260304359,-2.2058373719,4.5951016912\N,1.5414933182,-2.23873  
87659,1.4838288878\H,0.7243093291,-1.8575204921,0.8958878957\C,2.56461  
23033,-2.7917338749,0.6571444418\C,2.9722000849,-2.0428898938,-0.46104  
72129\H,2.5778893183,-1.0368639701,-0.6264747146\C,3.9159716176,-2.558  
4299043,-1.3530686468\H,4.2239684941,-1.9476288178,-2.2026772957\C,4.4  
647377977,-3.8392201825,-1.1345960487\C,4.0424771562,-4.5965397686,-0.  
0177881069\H,4.4592731862,-5.5975145398,0.1291211772\C,3.0976724633,-4  
.0816533751,0.8679494\H,2.7487860268,-4.6959150942,1.7016444446\C,3.09  
70930393,1.8968881536,-0.5531919319\C,3.864954238,1.4422714692,-1.6558  
258428\C,3.5256344494,1.6232071096,0.7783166701\C,5.0596057559,0.73778  
46734,-1.4052618306\C,4.7166581181,0.9038779735,0.9724413946\C,5.49843  
83419,0.447478859,-0.1051001833\H,5.6573601441,0.3823510928,-2.2530042  
626\H,5.047331442,0.6904956171,1.9935582044\C,-4.0027243648,-0.9042730  
275,-0.8091336685\C,-4.0737931391,-2.1005062728,-0.0406957161\C,-4.366  
5225063,-0.9227356914,-2.1832411381\C,-4.5366855545,-3.2777080403,-0.6  
557465011\C,-4.8161340288,-2.1292282223,-2.7519922161\C,-4.9145157304,  
-3.3167797595,-2.009392817\H,-4.5917505334,-4.1965260028,-0.0599298575  
\H,-5.1033920554,-2.1450531368,-3.8107121145\C,-3.2358922007,0.1800608  
886,5.2609038766\C,-4.3159237885,0.3305433866,-3.0589627807\H,-3.92743  
83441,1.1601586141,-2.4449837258\C,-3.6393422655,-2.153856359,1.425158  
4347\C,-5.3878176249,-4.6122458838,-2.6632002267\H,-5.6601311039,-4.36  
72241623,-3.7070592824\C,-4.8468005231,-2.3247547411,2.3687434185\H,-4  
.5160203461,-2.341768924,3.4233376415\H,-5.571552567,-1.4997945281,2.2  
500053527\H,-5.3785244437,-3.2732080274,2.166702811\C,-6.6430399605,-5  
.1844403381,-1.97379694\H,-6.4311091017,-5.4669703403,-0.9261678691\H,  
-7.4674729057,-4.4491286758,-1.9670814093\H,-6.995599312,-6.0901493951  
,-2.5005936301\C,-4.2558241424,-5.6599674951,-2.7091070316\H,-4.590051  
7287,-6.5726552173,-3.2360341447\H,-3.3679438537,-5.2646349204,-3.2339  
415523\H,-3.9443261405,-5.9524254314,-1.6893439449\C,-3.3550664162,0.1  
559164899,-4.252898608\H,-3.7064832541,-0.6325532096,-4.9440429405\H,-  
3.2861697614,1.0975233364,-4.8283735702\H,-2.3428792372,-0.1089549215,  
-3.9050499077\C,-5.7270080048,0.7420199398,-3.5289833071\H,-5.68077704  
38,1.6793175519,-4.1135875716\H,-6.1807384024,-0.0344182904,-4.1720259  
917\H,-6.4010869404,0.9077957171,-2.6692300516\C,6.7865138478,-0.33904  
39989,0.125789586\H,7.0652252735,-0.7890779218,-0.846203267\C,3.428284  
0962,1.6966720851,-3.0996169204\H,2.3851349357,2.0554312196,-3.0681631  
156\C,2.7354405306,2.1436905587,1.9826487144\H,1.6664783808,2.12779576  
02,1.7083500858\C,7.9358748198,0.5982549624,0.5532367493\H,8.878979887  
,0.0339989206,0.6742197527\H,8.1035338111,1.3914857364,-0.1970374187\H  
,7.7056056504,1.0873442662,1.5180474146\C,6.6041495095,-1.4883277646,1  
.1371924335\H,6.396820071,-1.1052853182,2.1531775243\H,5.7697925191,-2  
.1501578056,0.8458564841\H,7.523319739,-2.0993224165,1.1950651299\C,2.  
8887726086,1.277992602,3.2450265605\H,2.7142577781,0.211620907,3.02548  
02085\H,3.8952481349,1.3735547562,3.691393111\H,2.1577658208,1.5928248  
896,4.0105178163\C,3.1109919742,3.6111503581,2.2865741203\H,2.94123865

48,4.2603880351,1.4104289379\H,2.5042857596,4.0023379712,3.1239570255\  
H,4.1773694058,3.6886944626,2.5683140647\C,4.2924326543,2.7997541229,-  
3.7457986238\H,4.2555295756,3.7359810881,-3.1610552311\H,5.3507579127,  
2.4846250625,-3.8101754387\H,3.9411422279,3.0212109196,-4.7705421148\C  
,3.4311625571,0.4133658763,-3.9536394112\H,3.0644640138,0.6404111285,-  
4.9717728657\H,4.445654711,-0.014037683,-4.0570838618\H,2.7596514109,-  
0.3405716155,-3.5118516624\C,-2.5810656099,-3.2474405444,1.6719864002\  
H,-2.9937736734,-4.2615224443,1.516941185\H,-1.7228041426,-3.105484438  
,0.9949568897\H,-2.2166788091,-3.1927237587,2.7139323324\H,-3.16265266  
83,-1.1901503682,1.6654246734\O,5.3916260486,-4.419861915,-1.934932452  
8\C,5.8669620134,-3.6925295332,-3.0761169882\H,6.3571866135,-2.7487702  
769,-2.7719864249\H,6.6042379563,-4.3484708347,-3.5620084554\H,5.04554  
79963,-3.4723813409,-3.7827406752\H,-3.0851323019,1.2568245466,5.46042  
36113\H,-3.506720154,-0.3160856863,6.2071986326\H,-4.091805375,0.10155  
78178,4.5658346003\Version=ES64L-G09RevD.01\State=1-A\HF=-3330.592881  
2\RMSD=6.957e-09\RMSF=2.749e-06\Dipole=2.1755134,-1.3253505,4.5411343\  
Quadrupole=2.8335245,-5.2604859,2.4269613,-15.9182671,-10.4039154,-11.  
9699367\PG=C01 [X(C66H74N1O5P1)]\@

E-3b/1c (Type II; conf0)

1\1\GINC-WORKER1\FOpt\RTPSSTPSS\def2SVP\W06\C66H74N1O5P1\JHIOE\28-Jul-  
2016\0\#p tpsstps/def2svp/w06 densityfit empiricaldispersion=gd3 opt  
scrf=(smd,solvent=ch2cl2,read)\title\0,1\P,0.1607499878,0.674083363  
4,-0.9754215203\O,1.6173856444,0.0675513545,-1.5541419464\O,-0.4380430  
973,-0.7096320369,-0.1977872237\O,-0.6294912544,1.0651623957,-2.188601  
9034\O,0.4072649308,1.624421506,0.1952794647\C,2.0346087658,-2.0285880  
527,-0.4764491697\C,2.4314921966,-0.7209541621,-0.7715009928\C,3.70168  
37976,-0.1887043852,-0.3818398443\C,4.5357865336,-0.993722091,0.384014  
1203\H,5.5207535273,-0.6183673957,0.681135802\C,4.1353774819,-2.287345  
3612,0.8244164697\C,2.8584994845,-2.8132127464,0.4090076302\C,2.446852  
3288,-4.0775472816,0.9290111995\H,1.463702153,-4.4718180527,0.65614184  
44\C,3.2637707938,-4.7987071677,1.787579915\H,2.9206605335,-5.76140862  
44,2.1821738387\C,4.538441741,-4.2965291244,2.1644284116\H,5.177262202  
6,-4.8789625164,2.8372015454\C,4.9611302342,-3.0634682151,1.6929576906  
\H,5.9336098832,-2.6560970964,1.9914952575\C,0.7820136087,-2.578524332  
7,-1.0675742409\C,-0.4330785225,-1.9165767445,-0.8686531768\C,-1.69201  
3869,-2.4860781222,-1.2371242758\C,-1.6869978383,-3.6986556564,-1.9127  
423774\H,-2.6391973942,-4.1705497366,-2.1770928623\C,-0.4734959855,-4.  
355100345,-2.2685583634\C,0.7854283546,-3.7934366541,-1.845017063\C,1.  
9873423955,-4.4544660369,-2.2424363167\H,2.9523866502,-4.0221739101,-1  
.9623352228\C,1.9477858806,-5.6218242019,-2.9908774592\H,2.8837353398,  
-6.1058031981,-3.2911178186\C,0.7051578843,-6.1910447079,-3.3785747158  
\H,0.6881940549,-7.1166078238,-3.9643707725\C,-0.4798923248,-5.5644996  
422,-3.0266965831\H,-1.4450724183,-5.9833160244,-3.3336295969\C,-4.851  
9722206,3.3588164521,0.1125078712\C,-5.2543418737,2.9737491107,1.40696  
81593\H,-6.3019710397,3.0901642705,1.7044667531\C,-4.3459264075,2.4241  
638013,2.3154972182\H,-4.7115709113,2.1325177937,3.3026814361\C,-2.985  
8495253,2.2350285966,1.9636094137\C,-2.5728600288,2.6664966759,0.67471  
39869\H,-1.5283029587,2.5765033732,0.3627444703\C,-3.4879265971,3.2067  
939836,-0.2250516499\H,-3.13889586,3.512034951,-1.2173488878\C,-2.0553  
328965,1.6165803127,2.9187776047\C,-2.5301109906,1.2290510744,4.288750  
5691\H,-1.8261830391,0.5430143171,4.7800714675\H,-3.5107288946,0.73391  
26636,4.2136571564\H,-2.6568170093,2.1231436874,4.9248577323\N,-0.8096  
340065,1.3650646762,2.5594242815\H,-0.4855304265,1.5033472331,1.549516  
0732\C,0.2599543039,0.8668737255,3.3610558785\C,1.0769397702,-0.133508  
8663,2.804222378\H,0.8310110098,-0.5491769354,1.8239502433\C,2.2077061

146,-0.5889441659,3.4872648649\H,2.825622603,-1.3626614606,3.027541765  
7\C,2.5488523433,-0.0222411155,4.7336958481\C,1.7192271271,0.974564841  
8,5.2973094108\H,2.001882737,1.4125153064,6.2593281185\C,0.5861562335,  
1.4191450532,4.6181724917\H,-0.0155153397,2.2283274792,5.0409028034\C,  
-2.9776652722,-1.8525679091,-0.7945949722\C,-3.7412848075,-1.044785702  
,-1.6797745143\C,-3.4482357279,-2.1104566863,0.5181187202\C,-4.9737510  
953,-0.538841146,-1.2341137465\C,-4.6885554965,-1.5756054836,0.9198726  
403\C,-5.4741684565,-0.7950133622,0.0574497574\H,-5.5700973474,0.08188  
85383,-1.9129419186\H,-5.042777191,-1.7883698018,1.9333649301\C,4.1254  
89036,1.1792457022,-0.8214112183\C,4.2970300166,2.217166848,0.13437415  
24\C,4.3867822838,1.4334444839,-2.1978066102\C,4.7588262427,3.47435598  
23,-0.3019821242\C,4.8361335863,2.7087119173,-2.5817297927\C,5.0379594  
646,3.7436567391,-1.6506311889\H,4.8964647048,4.2754836311,0.434754281  
9\H,5.0418682998,2.8972124857,-3.642076498\C,-5.8380618336,3.884489790  
3,-0.8979782373\C,4.2306274668,0.354430724,-3.2719826358\H,3.852784165  
4,-0.5605203384,-2.7860611831\C,3.955364111,2.0252562872,1.612276017\C  
,5.5277321506,5.1207039188,-2.0903151195\H,5.637667003,5.7320517267,-1  
.1747542505\C,5.2096124885,2.0569772605,2.5083386978\H,4.9364901792,1.  
8468301253,3.5589900396\H,5.9518368366,1.3030561022,2.1900955386\H,5.7  
008616486,3.0473546381,2.4774381582\C,4.4953006326,5.8202905244,-2.998  
4674288\H,4.348865057,5.2601802329,-3.940519927\H,3.5143078299,5.90150  
27569,-2.4971781186\H,4.8328100054,6.8397541403,-3.2618961407\C,6.9087  
835245,5.0482749663,-2.7731088919\H,7.2727530048,6.0616446326,-3.02359  
51912\H,7.6558861343,4.5694828392,-2.1149440001\H,6.8631498323,4.46740  
17563,-3.7129099312\C,3.1981838145,0.7580647631,-4.3445153142\H,3.5275  
871977,1.6493868374,-4.9099072697\H,3.0579538596,-0.0647509016,-5.0696  
875534\H,2.2212441447,0.9777439535,-3.8825153881\C,5.5923946724,-0.002  
7434464,-3.9034459756\H,5.4773279664,-0.8238037117,-4.6349268273\H,6.0  
314153231,0.8621244594,-4.4340884334\H,6.3138687546,-0.3291503942,-3.1  
327201697\C,-6.8480548705,-0.2488367639,0.4483114006\H,-6.8797292086,0  
.801491078,0.0982333058\C,-3.2572697241,-0.757159533,-3.101538493\H,-2  
.1638633884,-0.9086885513,-3.1076393519\C,-2.6566717158,-2.9756830981,  
1.5018188488\H,-1.7238218661,-3.2863005064,1.001536517\C,-7.9636922689  
,-1.0141019349,-0.2991176728\H,-8.9562963653,-0.5856936556,-0.06738874  
83\H,-7.8194993271,-0.9686355975,-1.3930156584\H,-7.9723807675,-2.0792  
347677,-0.0018225139\C,-7.1171870541,-0.244951096,1.9607414893\H,-7.21  
35696973,-1.2714025843,2.3600027303\H,-6.3095615205,0.261530141,2.5167  
017302\H,-8.0626200225,0.2840099482,2.1769553103\C,-2.2520555145,-2.18  
17136528,2.7595517927\H,-1.6896548016,-1.2768046693,2.4794198211\H,-3.  
13543935,-1.8714885638,3.3467998858\H,-1.6078225173,-2.7941167872,3.41  
67609383\C,-3.4265526291,-4.2615385122,1.865385093\H,-3.6749940854,-4.  
8437959538,0.9598208752\H,-2.8190156993,-4.9036148078,2.5295672824\H,-  
4.371621816,-4.0305513558,2.3909472713\C,-3.8906943404,-1.7473136242,-  
4.1027916817\H,-3.665188975,-2.7944913691,-3.8362101855\H,-4.990941841  
7,-1.6339823837,-4.1243832678\H,-3.5093941279,-1.565771394,-5.12479231  
62\C,-3.504989332,0.6977881051,-3.5393083374\H,-3.0378408366,0.8761210  
052,-4.5249561555\H,-4.5827187112,0.9245256681,-3.6392247851\H,-3.0520  
573238,1.399188579,-2.8209508716\C,2.9025871257,3.0480555686,2.0850281  
784\H,3.2860638679,4.0838749434,2.0334014515\H,1.9942993218,2.97428061  
77,1.4640988413\H,2.6231637737,2.846007162,3.1345006087\H,3.4996188088  
,1.028655129,1.7208339664\O,3.6541749088,-0.3525345379,5.4468680805\C,  
4.5769240735,-1.2945431859,4.8808824502\H,5.4012287247,-1.375344036,5.  
6048821307\H,4.1066499306,-2.285383012,4.744194742\H,4.9681073984,-0.9  
321933704,3.913337266\H,-6.8347637623,4.0400983295,-0.4538552485\H,-5.  
9401024541,3.1676324916,-1.7347300995\H,-5.4904794213,4.8377204194,-1.  
335507126\\Version=ES64L-G09RevD.01\State=1-A\HF=-3330.5940002\IRMSD=3.

814e-09\RMSF=3.441e-06\Dipole=-1.8546753,-0.0407981,4.8139258\Quadrupole=17.0220912,-10.258141,-6.7639502,-22.1453193,-5.5066661,6.7470101\PG=C01 [X(C66H74N1O5P1)]\@

E-3b/1c (Type II; conf1)

1\1\GINC-LOGIN\FOpt\RTPSS\TPSS\def2SVP/W06\C66H74N1O5P1\JHIOE\29-Jul-2016\0\#p tpsstps/def2svp/w06 densityfit empiricaldispersion=gd3 opt s crf=(smd,solvent=ch2cl2,read)\title\0,1\P,-0.1442427659,-0.559364605 9,-1.0953880571\O,-1.5832816463,0.1155075613,-1.6423440195\O,0.446739064,0.7335135843,-0.1688964762\O,0.6706293001,-0.83160599,-2.3247638712\O,-0.4232756009,-1.6201702224,-0.0315081302\C,-2.003725288,2.1071731426,-0.3838333743\C,-2.4070654666,0.8376763313,-0.8078835069\C,-3.6918052986,0.2877532571,-0.4989317595\C,-4.5369058493,1.0299182092,0.3164272843\H,-5.5325412139,0.6409901167,0.5545341605\C,-4.1347006638,2.2731130434,0.8826540959\C,-2.8414685338,2.8177456134,0.5501716174\C,-2.4295479848,4.0223787377,1.1963087948\H,-1.434879844,4.4264389343,0.9870717707\C,-3.26097799,4.67221783,2.0968778967\H,-2.9173508428,5.5889442199,2.5885679937\C,-4.55149422,4.1559507619,2.3914168666\H,-5.2019761512,4.6829054437,3.0978818032\C,-4.9752449485,2.9777256444,1.7968372547\H,-5.9602739804,2.5583399447,2.030497795\C,-0.7296603972,2.6921038613,-0.8893074496\C,0.4723914716,1.99873233,-0.721831722\C,1.747221668,2.5841161784,-0.9996070131\C,1.7743945515,3.8559059143,-1.554833662\H,2.738565325,4.3385437239,-1.7464475313\C,0.5781798534,4.5583249113,-1.8809115936\C,-0.6979466507,3.9742120902,-1.5497341822\C,-1.8813621914,4.6830768214,-1.9189994842\H,-2.8579064183,4.2367412953,-1.7093031628\C,-1.808910342,5.9142497614,-2.5541565114\H,-2.7309323667,6.4345618742,-2.8362164315\C,-0.5500694966,6.5030098717,-2.8492408387\H,-0.5069588876,7.4786290602,-3.3456824631\C,0.6182291436,5.8331445046,-2.5219329913\H,1.5959000821,6.2678793273,-2.7594563872\C,4.8077677328,-3.4244525483,-0.1455608864\C,5.1884272081,-3.1446466714,1.182020293\H,6.2285065625,-3.2964013664,1.4896682413\C,4.2675416914,-2.6566490747,2.1126350549\H,4.6160116209,-2.4464266911,3.1263234235\C,2.9167836204,-2.4256617454,1.7508280772\C,2.5246625276,-2.7516366626,0.424999475\H,1.4873533906,-2.6253679802,0.1013279258\C,3.4521237056,-3.231906817,-0.4960756745\H,3.1199053017,-3.4560442463,-1.5154095128\C,1.9738922179,-1.875096399,2.7349967745\C,2.4253739787,-1.6108283402,4.1417398138\H,1.7149156072,-0.9689773296,4.6806530873\H,3.407720668,-1.1132506662,4.1255257729\H,2.5412319038,-2.5581226744,4.6976925845\N,0.7395104259,-1.5774760886,2.3726289462\H,0.4351560994,-1.6258114657,1.3480331241\C,-0.3407175541,-1.1374801526,3.1941552597\C,-1.1295693891,-0.074304251,2.7201433711\H,-0.8560935889,0.4299166268,1.7900247993\C,-2.2674111384,0.3329798055,3.421851231\H,-2.8624017756,1.1584792229,3.0264467819\C,-2.6441611116,-0.3450716908,4.6005842965\C,-1.8433013241,-1.406862352,5.0810315414\H,-2.1542729129,-1.9313962771,5.9895371905\C,-0.7030867145,-1.8035385233,4.3843946131\H,-0.1229475786,-2.66106916,4.7362025293\C,3.0110602954,1.891842763,-0.5829465683\C,3.7854371882,1.1503133056,-1.5155326139\C,3.4482357532,2.0243195177,0.7594766906\C,4.9953734846,0.5827143371,-1.0831609582\C,4.6692294211,1.4351793143,1.1449536959\C,5.4650418393,0.7178900026,0.2380456513\H,5.6009043546,0.0129665098,-1.7975449116\H,4.9992519751,1.5530173221,2.1819432125\C,-4.1165870877,-1.0300998142,-1.0711716249\C,-4.3107173282,-2.1516598919,-0.2169420068\C,-4.3534187927,-1.1538087499,-2.4674110141\C,-4.76917543,-3.3597824858,-0.772226053\C,-4.8009959785,-2.3885684462,-2.9740373228\C,-5.022431339,-3.5023832498,-2.1475220302\H,-4.9189531755,-4.2198309018,-0.1090932201\H,-4.9908345547,-2.4863561031,-4.050198889\C,5.8089413913,-3.8810354679,-1.1745717893\C,-4.1724932011,0.0194123375,-3.4328175416\H,-3.8046894689,0.8827

915451,-2.8535677849\C,-3.9952287743,-2.0946552198,1.2781179707\C,-5.5  
095227257,-4.8258859574,-2.730863035\H,-5.6327827733,-4.6736153625,-3.  
8196955717\C,-5.2692889406,-2.1717615705,2.1427123175\H,-5.0159186867,  
-2.0590621863,3.2130594974\H,-5.9867355943,-1.3757299198,1.874731276\H  
,-5.7810842883,-3.1439865615,2.0158395452\C,-6.8824606032,-5.233237101  
8,-2.1575176573\H,-6.8225315087,-5.4196913147,-1.0692403208\H,-7.63698  
99761,-4.4438761833,-2.3251337498\H,-7.2443009446,-6.1610515742,-2.637  
6481009\C,-4.4713743729,-5.9493181568,-2.5298742507\H,-4.809981514,-6.  
8840494444,-3.0136109862\H,-3.4938197083,-5.6723793521,-2.9635141954\H  
,-4.3183620957,-6.1627236829,-1.4557269673\C,-3.1167157499,-0.28452497  
65,-4.5153762272\H,-3.4351432558,-1.1163599404,-5.1704935437\H,-2.9584  
295897,0.603286523,-5.1551920518\H,-2.150818649,-0.5508684768,-4.05472  
97511\C,-5.5194183188,0.4390294356,-4.0578033091\H,-5.3869386092,1.325  
5331272,-4.7050983869\H,-5.9469925958,-0.3699802328,-4.6782602255\H,-6  
.2578161188,0.6933605984,-3.2760353736\C,6.8222001049,0.1199219737,0.6  
106644783\H,6.8495953549,-0.8953355625,0.1688319234\C,3.3413036134,1.0  
082707449,-2.9722591832\H,2.2496420955,1.1699399687,-2.9944406546\C,2.  
6427170773,2.8158423582,1.7924537924\H,1.7157369299,3.1604552628,1.303  
7544543\C,7.9630351429,0.9344084329,-0.0408770325\H,8.9454703945,0.475  
3141431,0.1747405189\H,7.8445178972,0.987413481,-1.1374737601\H,7.9751  
837734,1.9689669758,0.3496646094\C,7.0575685708,-0.0204339005,2.122345  
9989\H,7.1563590355,0.9656626651,2.6124285284\H,6.2333163899,-0.563954  
3295,2.6154904755\H,7.9926787127,-0.5778466843,2.3102312776\C,2.222285  
5142,1.9371913394,2.9868896821\H,1.6672957106,1.0515076327,2.638194661  
4\H,3.0969169927,1.5910488362,3.5669804213\H,1.5654464715,2.5024812408  
,3.67315507\C,3.4081986463,4.0726370719,2.2542654184\H,3.6663760539,4.  
7173896831,1.3949405754\H,2.7943189397,4.6667767987,2.9562036123\H,4.3  
4791494,3.8029260274,2.7710372451\C,4.0106109867,2.0880677662,-3.84981  
0207\H,3.7890435663,3.1049903481,-3.4821304571\H,5.1098599205,1.963377  
9256,-3.855568019\H,3.6536957728,2.0177617738,-4.8941362235\C,3.591311  
2235,-0.3969409259,-3.548712222\H,3.1598339148,-0.4663089329,-4.563856  
2567\H,4.6694413315,-0.6282019642,-3.6323997419\H,3.1043909711,-1.1623  
612437,-2.9242879268\C,-2.9771044585,-3.1799256856,1.6823907101\H,-3.3  
826466114,-4.197976533,1.5348284376\H,-2.054044447,-3.0759461535,1.088  
0771779\H,-2.716250891,-3.0756464883,2.7506795993\H,-3.5192381471,-1.1  
22024863,1.4790192966\O,-3.7592572528,-0.0648051062,5.3201761686\C,-4.  
6524016015,0.945382604,4.8293465997\H,-5.488751248,0.9755359206,5.5433  
01258\H,-4.1604178164,1.9344577441,4.7949031806\H,-5.031036172,0.68375  
57344,3.8250184316\H,5.4572490773,-4.7883705128,-1.6979099938\H,6.7926  
745739,-4.0898093275,-0.7232760009\H,5.9414025978,-3.0985976582,-1.945  
9313669\Version=ES64L-G09RevD.01\State=1-A\HF=-3330.5939578\IRMSD=3.47  
0e-09\RMSF=4.111e-06\Dipole=1.7576382,-0.427606,4.8468111\Quadrupole=1  
6.5732257,-7.8755362,-8.6976895,-22.7224528,3.8302453,-6.912052\PG=C01  
[X(C66H74N1O5P1)]\@

E-3b/1c (Type II; conf2)

1\1\GINC-WORKER0\FOpt\RTPSSTPSS\def2SVP/W06\C66H74N1O5P1\JHIOE\29-Jul-  
2016\0\#p tpsstps/def2svp/w06 densityfit empiricaldispersion=gd3 opt  
scrf=(smd,solvent=ch2cl2,read)\title\0,1\P,-0.1315475223,-0.7494063  
175,-0.9149222229\O,-1.5678276758,-0.2399423173,-1.6174824893\O,0.4212  
545992,0.7292119141,-0.2954883275\O,0.7121144631,-1.2751777046,-2.0378  
332857\O,-0.4152128738,-1.5442080535,0.3592600977\C,-2.0563201476,1.96  
05377997,-0.8160069172\C,-2.4174170731,0.6171751681,-0.9519230962\C,-3  
.674494066,0.0982478154,-0.5066540533\C,-4.5455667498,0.9713363643,0.1  
319384216\H,-5.5250657398,0.6091915647,0.4610788299\C,-4.1865780827,2.  
3211765013,0.4100649189\C,-2.9164647547,2.8273976618,-0.0489958179\C,-

2.545083118,4.1553418868,0.3214320578\H,-1.5679402732,4.5407670031,0.0  
161670384\C,-3.3924503764,4.950239165,1.0799823034\H,-3.0791297942,5.9  
611053629,1.3631203833\C,-4.6596506363,4.4625010812,1.4986899145\H,-5.  
3221660811,5.101865168,2.0921902122\C,-5.0447928487,3.1722738494,1.169  
4012253\H,-6.0103515207,2.7761931689,1.5034918904\C,-0.7914792122,2.45  
59905127,-1.4316145791\C,0.4232307214,1.8446736248,-1.1079733877\C,1.6  
905035527,2.3821168228,-1.4960430186\C,1.7005086213,3.4934574364,-2.32  
68981591\H,2.6571726316,3.9391998871,-2.6187036592\C,0.493358228,4.079  
9553988,-2.807788722\C,-0.7759084372,3.562105223,-2.3571266039\C,-1.96  
81956355,4.1519159774,-2.8760668657\H,-2.9382934297,3.7488209488,-2.57  
14489531\C,-1.912786324,5.2099480608,-3.7717113701\H,-2.8420047625,5.6  
382893139,-4.1633655742\C,-0.6621500019,5.7366071898,-4.1918431258\H,-  
0.6317010812,6.574825855,-4.8964869063\C,0.5150651118,5.1774859878,-3.  
7200873334\H,1.4866122569,5.5652340358,-4.0472024523\C,4.7564471725,-3  
.4517223999,0.5056281049\C,5.2008923912,-2.8557186467,1.7033118349\H,6  
.2509658019,-2.9541304348,1.9983759726\C,4.3308060455,-2.1252758419,2.  
5166680677\H,4.7287100201,-1.6717414186,3.4275871169\C,2.9663500688,-1  
.9661896051,2.1665958115\C,2.5128657078,-2.5970981165,0.9777856723\H,1  
.4647973468,-2.5280274724,0.6722770604\C,3.3917502433,-3.3113167299,0.  
1678638376\H,3.0110298242,-3.771717327,-0.7502568223\C,2.0689498408,-1  
.1831570448,3.0282536524\C,2.5790097072,-0.6081868571,4.3173282112\H,1  
.8927208653,0.1463135586,4.7255855318\H,3.5590587766,-0.1356050349,4.1  
453996438\H,2.7222926334,-1.404228174,5.0695126423\N,0.8216826897,-0.9  
629982701,2.6538512335\H,0.4792509375,-1.2439983224,1.6797008214\C,-0.  
2317674774,-0.3506695536,3.3945366197\C,-1.0635308207,0.5616058733,2.7  
201674039\H,-0.8387959323,0.8356766084,1.6862620179\C,-2.1802591773,1.  
1085081266,3.3583296676\H,-2.8110231905,1.8106319773,2.8091058307\C,-2  
.4910580458,0.7235039544,4.6800404128\C,-1.6475306548,-0.1858583262,5.  
3592334388\H,-1.90718586,-0.4836539775,6.3796369689\C,-0.5295718486,-0  
.7219841918,4.7231626349\H,0.0849657465,-1.4645447336,5.2395632909\C,2  
.9547352343,1.8335071962,-0.9032980055\C,3.8017588622,0.9673197076,-1.  
6368088182\C,3.3128649213,2.2324908574,0.4148916165\C,5.0186774132,0.5  
517501259,-1.0579643305\C,4.5277548319,1.7787018855,0.9536111764\C,5.4  
096718523,0.9517820655,0.2295531078\H,5.6731185491,-0.1032631546,-1.63  
99580749\H,4.8065736241,2.0883170058,1.9681693044\C,-4.0395915941,-1.3  
35666337,-0.7403062854\C,-4.1853256757,-2.2213709035,0.3629205756\C,-4  
.2702958776,-1.8077738237,-2.0629935015\C,-4.5944846591,-3.547025685,0  
.1207276563\C,-4.6662062743,-3.1432873035,-2.250718434\C,-4.8440338973  
,-4.0298911283,-1.1734352042\H,-4.7120564153,-4.2315427512,0.969756815  
9\H,-4.8482954899,-3.5002684071,-3.2713320797\C,5.697241452,-4.2010495  
876,-0.4017384603\C,-4.1286635323,-0.9033040982,-3.2893036609\H,-3.797  
8920566,0.0905427697,-2.945243192\C,-3.8717507403,-1.7880771155,1.7959  
318797\C,-5.2856463967,-5.4728924982,-1.4022838533\H,-5.3479975163,-5.  
954558978,-0.4082533531\C,-5.1447072654,-1.6513260252,2.6556638151\H,-  
4.8893189941,-1.276400079,3.6642029365\H,-5.8648162366,-0.9476642361,2  
.2021915612\H,-5.6554957303,-2.6251133954,2.7753921264\C,-4.253107824,  
-6.2566440125,-2.238326013\H,-4.1574556299,-5.8316373425,-3.2544542246  
\H,-3.255278761,-6.2319295702,-1.7650183676\H,-4.5583672474,-7.3140826  
913,-2.3425150593\C,-6.6863156223,-5.5405121602,-2.0452569593\H,-7.013  
5028341,-6.590230986,-2.1603710138\H,-7.4351748596,-5.0138914391,-1.42  
68084896\H,-6.687638472,-5.0749854474,-3.0481174226\C,-3.0552414956,-1  
.4317540141,-4.2626496222\H,-3.3480209365,-2.4071043615,-4.6935813361\  
H,-2.91390851,-0.7242909718,-5.1005734875\H,-2.0872018182,-1.551631248  
9,-3.7482900559\C,-5.4840894278,-0.7052243859,-4.0000272939\H,-5.37804  
60514,-0.0015206637,-4.8462172288\H,-5.8721654107,-1.6593353767,-4.401  
7919595\H,-6.2417457791,-0.2951552996,-3.3078949941\C,6.7452380195,0.5



472528532,0.8593286626\H,6.507448614,0.1254946462,1.8565229396\C,3.435  
2177185,0.5067626713,-3.0484364803\H,2.3509971721,0.6732651486,-3.1720  
49718\C,2.438106195,3.1960304933,1.2219890682\H,1.4563990016,3.2589268  
642,0.7228433644\C,7.5166302918,-0.5230038908,0.0723864221\H,8.4144817  
297,-0.8321576961,0.6366174579\H,6.9058362798,-1.4227662995,-0.1107787  
123\H,7.8568320017,-0.1368090375,-0.906177096\C,7.6400818535,1.7868782  
464,1.0876739816\H,7.9066193301,2.2570090187,0.1229225986\H,7.13537500  
35,2.5488014836,1.7072238985\H,8.5775271384,1.5006063893,1.5989599001\  
C,2.1752457123,2.7092617963,2.6581008954\H,1.7220509494,1.7054387034,2  
.6497424022\H,3.1003238089,2.6663691004,3.2608290064\H,1.4747142121,3.  
39229893,3.1718875053\C,3.0457807562,4.6144687838,1.2070307533\H,3.168  
1645187,4.9826988864,0.1726667796\H,2.3943045325,5.3248639439,1.748844  
8674\H,4.0403029562,4.624284081,1.6905673351\C,4.178678267,1.350244791  
7,-4.1058745109\H,3.9509501456,2.4252117066,-3.9981365643\H,5.27345403  
05,1.2253954575,-4.007735276\H,3.8904115226,1.0403752836,-5.1274005465  
\C,3.6827703333,-0.9978345616,-3.26652992\H,3.3199918745,-1.2970158247  
, -4.2669291777\H,4.7570761278,-1.2537466242,-3.2153602457\H,3.13233400  
6,-1.5890307926,-2.5177819804\C,-2.8462475113,-2.7233840778,2.46681499  
54\H,-3.2471402017,-3.7448250316,2.6022420428\H,-1.9261283933,-2.77932  
01752,1.8618620607\H,-2.5812254307,-2.3350543467,3.4663962373\H,-3.403  
5684373,0.7927032259,1.7424821547\O,-3.5793053453,1.1546236492,5.3651  
684258\C,-4.4996239725,2.0340570997,4.7033944907\H,-5.3004153121,2.230  
605697,5.4315133671\H,-4.0142576462,2.9868864417,4.4237434391\H,-4.927  
4152251,1.5568392702,3.8030947519\H,5.3097482849,-5.2123834256,-0.6224  
044261\H,6.7020502374,-4.2968789293,0.0404455142\H,5.791858982,-3.6773  
068299,-1.3716243856\\Version=ES64L-G09RevD.01\State=1-A\HF=-3330.5935  
241\RMSE=3.008e-09\RMSE=2.476e-06\Dipole=1.7665572,0.6505968,4.8068416  
\Quadrupole=15.6211001,-10.5130703,-5.1080298,-21.248401,8.7426396,-5.  
4112204\PG=C01 [X(C66H74N1O5P1)]\@

## Z-configuration

Z-3b/1c (Type II; conf0)

1\1\GINC-LOGIN\FOpt\RTSPSS\def2SVP/W06\C66H74N1O5P1\JHIOE\30-Jul-20  
16\0\#p tpsstps/def2svp/w06 densityfit empiricaldispersion=gd3 opt s  
crf=(smd,solvent=ch2cl2,read)\title\0,1\P,-0.802747217,0.2233034048,  
-1.6524322364\O,-2.1555279966,1.0164786439,-1.0568298685\O,0.371555565  
2,0.776294169,-0.5509073495\O,-0.601500108,0.7371194083,-3.0459997891\  
O,-0.8868827822,-1.2645774731,-1.316813632\C,-1.6231844043,1.860566823  
4,1.1083573308\C,-2.3938879468,1.0223870431,0.3015797582\C,-3.46467829  
32,0.2183498943,0.8033326721\C,-3.7220912192,0.2669103535,2.1670773043  
\H,-4.5552516826,-0.3115608932,2.5787416051\C,-2.9098568723,1.02508483  
49,3.0591341767\C,-1.8259631424,1.819210213,2.5345225305\C,-0.96734636  
08,2.488390425,3.4583770081\H,-0.1161121804,3.0600917645,3.0770903507\  
C,-1.1845705347,2.4033718349,4.826205751\H,-0.5042810152,2.9138990836,  
5.5166139395\C,-2.2772770187,1.653857427,5.3394156333\H,-2.4398576354,  
1.5968055652,6.4211406766\C,-3.1202477255,0.9786786443,4.4703219426\H,  
-3.9525588631,0.3784829067,4.8548336472\C,-0.5721017551,2.7191262025,0  
.4917989447\C,0.4479169703,2.1240300012,-0.2581699799\C,1.6310921116,2  
.834641454,-0.6385219656\C,1.6679101589,4.2052257583,-0.4177569455\H,2  
.5696204944,4.767736857,-0.6833325441\C,0.5789243994,4.8989871447,0.18  
58946275\C,-0.5517452202,4.1477893575,0.6731493136\C,-1.6249259017,4.8  
606444154,1.2883137164\H,-2.5011397994,4.3064263684,1.6380082444\C,-1.  
5781069313,6.2399665571,1.4292947495\H,-2.4178486183,6.7670863364,1.89  
5474099\C,-0.4539406568,6.9760778412,0.9673295963\H,-0.4273712258,8.06  
44684986,1.0890719463\C,0.6007386021,6.315712721,0.3564721816\H,1.4700  
507211,6.8730322798,-0.0107541218\C,5.7570430328,-4.2960165372,1.03012

36733\C,5.059902973,-3.2123321788,1.6115708313\H,5.4858136045,-2.69992  
34385,2.4816374575\C,3.8445361693,-2.7721625343,1.0906198077\H,3.33674  
00744,-1.9200940803,1.5481805466\C,3.2855256725,-3.3920198657,-0.05253  
25782\C,3.9896366405,-4.4568561077,-0.6557552553\H,3.5845927154,-4.951  
163392,-1.5436956495\C,5.1958055544,-4.9093852079,-0.1074850605\H,5.71  
68326397,-5.7498911953,-0.5789551924\C,2.0468798452,-2.8684594243,-0.6  
574423154\C,1.9553568072,-2.7523154338,-2.1496328686\H,1.0032329431,-2  
.2951267372,-2.456553202\H,2.0375538479,-3.757582916,-2.6019707735\H,2  
.8030336493,-2.1548816594,-2.5282870091\N,1.0196220496,-2.4436945778,0  
.042386387\H,0.2403895113,-1.9428033651,-0.5184426085\C,0.7380646238,-  
2.5508123846,1.43394334\C,0.0470038083,-1.4868479484,2.0389656819\H,-0  
.2171644295,-0.6055115101,1.4476331166\C,-0.2951265868,-1.540677478,3.  
3947250404\H,-0.8222792499,-0.6949663032,3.8414171878\C,0.0336091384,-  
2.6835940357,4.1532413817\C,0.6975464376,-3.7681369668,3.5303757568\H,  
0.9191699599,-4.6594676593,4.1251270866\C,1.0473260203,-3.7051374377,2  
.1848916481\H,1.5438643097,-4.5555574066,1.7107760039\C,2.8534553148,2  
.071434581,-1.0595549303\C,3.105199127,1.7452169841,-2.4162238597\C,3.  
7676358985,1.6712459153,-0.0425591339\C,4.2587674611,1.0010608159,-2.7  
295416388\C,4.8991080185,0.9185230477,-0.406719403\C,5.1628467845,0.56  
96702323,-1.7435526671\H,4.4667877904,0.7501315737,-3.7757736484\H,5.5  
975157589,0.6010635047,0.3751989322\C,-4.2835595667,-0.6213435012,-0.1  
292264372\C,-4.1804053201,-2.0409899716,-0.0951891651\C,-5.1729456648,  
0.0037983166,-1.0436257017\C,-4.9961037473,-2.8007742716,-0.9522511476  
\C,-5.9586270645,-0.8027262614,-1.889100243\C,-5.8924911978,-2.2045617  
977,-1.8575906193\H,-4.9206229675,-3.8935942882,-0.92026768\H,-6.64732  
39401,-0.3230205994,-2.5959742589\C,7.0816196281,-4.7460908636,1.59445  
45392\H,7.0207265709,-4.8903589355,2.6880745413\H,7.4220581301,-5.6873  
01157,1.1324851463\H,7.8562494281,-3.9761432699,1.4148865206\C,-5.3199  
921066,1.5244275791,-1.1246953031\H,-4.6189056764,1.972772961,-0.40063  
93315\C,-3.1999099087,-2.7574697794,0.8357318922\C,-6.7622603787,-3.05  
09548197,-2.783313551\H,-7.3390386046,-2.3497378676,-3.4156909625\C,-3  
.9133618715,-3.3436037687,2.0719656455\H,-3.1805853772,-3.8096099822,2  
.7566506719\H,-4.458991649,-2.5665955944,2.6347415008\H,-4.6440921353,  
-4.1193678984,1.7754781625\C,-7.7723605067,-3.9027270327,-1.9870975783  
\H,-7.2535773075,-4.6291635452,-1.3344240781\H,-8.4127533426,-3.269386  
5773,-1.3472849282\H,-8.4279763781,-4.4723979189,-2.6713771091\C,-5.91  
00505498,-3.9322617587,-3.7193037938\H,-6.5541376098,-4.4796610195,-4.  
4317181627\H,-5.1954452797,-3.32208915,-4.299925988\H,-5.331096999,-4.  
680177235,-3.1468942423\C,-4.9393649295,2.0585801062,-2.5207423138\H,-  
5.6327522814,1.6877261289,-3.2979825645\H,-4.9805774367,3.1634942326,-  
2.5345055552\H,-3.915434219,1.7493584452,-2.7902460036\C,-6.7382171495  
,1.9725922298,-0.7142718465\H,-6.8134002521,3.0755739975,-0.7215497964  
\H,-7.5033786716,1.5779252372,-1.4078644101\H,-6.988149245,1.619974122  
2,0.3027105484\C,6.4180593293,-0.2100797735,-2.1284151719\H,6.32003324  
27,-0.4705479828,-3.1993061819\C,2.1796671731,2.2573282093,-3.51826173  
31\H,1.1730971937,2.3524460039,-3.0769481328\C,3.5254085977,2.02492070  
01,1.4291009843\H,2.8178262192,2.8700877325,1.4501911799\C,7.678099181  
2,0.6684614852,-1.9741629767\H,8.5804408761,0.1213681104,-2.3042455178  
\H,7.5971024811,1.5919208191,-2.5749877253\H,7.8267335395,0.9627926068  
,-0.9185434819\C,6.5596817162,-1.5237921034,-1.336187736\H,6.714083470  
8,-1.3302897822,-0.2595962081\H,5.660441679,-2.1550328293,-1.439966605  
\H,7.428646562,-2.1040630098,-1.6965833449\C,2.849889815,0.8581858714,  
2.1792223859\H,1.961966335,0.4968893897,1.6362636846\H,3.5502358027,0.  
0118651035,2.2955830845\H,2.5289038651,1.173770857,3.1888569263\C,4.80  
00996423,2.4872285479,2.1590136497\H,5.2859600724,3.3265451581,1.62960  
16582\H,4.5487860291,2.8272826628,3.1801404548\H,5.5399339002,1.671849

07.2.2569739564\C,2.6361177885,3.6569675681,-3.9854934288\H,2.66777508  
83,4.371039926,-3.1440948257\H,3.648094188,3.6123853488,-4.4302075749\  
H,1.9435912654,4.0584534199,-4.7483224045\C,2.0465846778,1.2978464883,  
-4.7128226968\H,1.2628175615,1.6635696051,-5.399574763\H,2.9848917928,  
1.2213447647,-5.2931200513\H,1.7515736069,0.2892551262,-4.3787001369\C  
,-2.3893265023,-3.8494301569,0.1105267504\H,-3.0277213056,-4.695766932  
4,-0.2030227122\H,-1.8903354486,-3.433198927,-0.7793975787\H,-1.614986  
3242,-4.2536248922,0.7869308189\H,-2.4787191217,-2.0030967244,1.190592  
977\O,-0.2548651286,-2.8405614061,5.4682410692\C,-0.9543023288,-1.7868  
613019,6.1449517424\H,-1.0780275887,-2.1282255325,7.183406543\H,-0.370  
7803454,-0.8481375753,6.1313474215\H,-1.9466233428,-1.6133022854,5.690  
6786851\Version=ES64L-G09RevD.01\State=1-A\HF=-3330.5888105\RMSE=6.14  
7e-09\RMSF=3.480e-06\Dipole=3.6939405,-3.2532555,3.9805515\Quadrupole=  
7.7089922,4.0989184,-11.8079106,-21.9277093,-8.2822466,11.1998768\PG=C  
01 [X(C66H74N1O5P1)]\@

Z-3b/1c (Type II; conf1)

1\1\GINC-WORKER1\FOpt\RTPSSTPSS\def2SVP/W06\C66H74N1O5P1\JHIOE\30-Jul-  
2016\0\#p tpsstps/def2svp/w06 densityfit empiricaldispersion=gd3 opt  
scrf=(smd,solvent=ch2cl2,read)\title\0,1P,-0.8364222524,0.20541995  
72,-1.627370658\O,-2.2025115978,0.9266678654,-0.9740315547\O,0.3413448  
369,0.7612538752,-0.5310792896\O,-0.6888685882,0.7767351526,-3.0051269  
575\O,-0.8580574817,-1.2956432207,-1.3452005272\C,-1.6482467747,1.7340  
709242,1.1988578067\C,-2.407763923,0.8889249524,0.3885530322\C,-3.4364  
72491,0.0332078164,0.8932493627\C,-3.658784048,0.0338893254,2.26416597  
28\H,-4.4577399964,-0.5878606499,2.680433313\C,-2.8533957147,0.7990754  
721,3.1564045099\C,-1.8144566384,1.6486280613,2.6275715596\C,-0.961020  
9865,2.3285992721,3.548295803\H,-0.1421971344,2.9425177731,3.162035099  
6\C,-1.142446651,2.202430201,4.9180570755\H,-0.4670397546,2.7234996822  
,5.6053462991\C,-2.1921619169,1.3975001033,5.4369871917\H,-2.32752911,  
1.3091551526,6.5203775903\C,-3.0274247117,0.7093035875,4.5705470621\H,  
-3.8262711451,0.0675469935,4.9589659983\C,-0.6422010569,2.6445388965,0  
.5805951751\C,0.3813826937,2.1024590173,-0.2036693116\C,1.533922882,2.  
85988008,-0.5872872931\C,1.5252817348,4.2269362953,-0.3429948961\H,2.4  
013430203,4.8261212848,-0.6140566398\C,0.424959597,4.869311185,0.29603  
79418\C,-0.6661125506,4.0684491394,0.7952411058\C,-1.7454522342,4.7293  
321925,1.4559732408\H,-2.5904152219,4.1366125691,1.8194057692\C,-1.743  
363106,6.1063192729,1.6250181127\H,-2.586872354,6.5933446985,2.1266762  
208\C,-0.6602949182,6.8917946836,1.1463341258\H,-0.6696556508,7.977922  
1063,1.2888724887\C,0.3997272756,6.2824436109,0.4933059681\H,1.2382450  
94,6.877825746,0.1144652614\C,5.9342844651,-4.1164475951,0.8164205749\  
C,5.2102608177,-3.0599414025,1.4143867129\H,5.6309217462,-2.5387649758  
,2.2817724133\C,3.9752011411,-2.656132512,0.9110141354\H,3.4459852204,  
-1.8219840879,1.3772733025\C,3.4211166554,-3.2879960633,-0.2276420554\  
C,4.1513861505,-4.3239828,-0.8490896874\H,3.7505334132,-4.8272870656,-  
1.73405176\C,5.3794964236,-4.7391648494,-0.319333598\H,5.9223976984,-5  
.5584185164,-0.8034521379\C,2.1498022417,-2.804706283,-0.7977352362\C,  
2.0234131307,-2.6521729321,-2.2834999383\H,1.0445880083,-2.2330473643,  
-2.5593830405\H,2.1451811585,-3.6391246925,-2.7659407909\H,2.834545137  
7,-2.0046774682,-2.6600114215\N,1.1209138281,-2.4450684227,-0.06487766  
5\H,0.3101821898,-1.9593230217,-0.5932651144\C,0.8757949012,-2.6062162  
478,1.3284578108\C,0.1489305493,-1.5949389888,1.9796155214\H,-0.167180  
0294,-0.7106649998,1.4197302115\C,-0.16280323,-1.7045792529,3.33955847  
44\H,-0.7207466448,-0.8983449405,3.8202352782\C,0.2355077717,-2.851884  
2099,4.056522086\C,0.9361760239,-3.8847147574,3.3876874272\H,1.2119384  
199,-4.7820001204,3.9500241052\C,1.2537945183,-3.7661883858,2.03789796

04\H,1.7773356431,-4.5798258061,1.5298731675\C,2.7785297091,2.14848991  
28,-1.0347331261\C,3.0276812021,1.8542353962,-2.3988875048\C,3.7199491  
499,1.7697864319,-0.0334818713\C,4.2085740795,1.1658846355,-2.73730343  
79\C,4.8776301941,1.0713727189,-0.4227464731\C,5.1409117295,0.75670179  
81,-1.7684860865\H,4.4159556727,0.9426755374,-3.7900198133\H,5.5976139  
944,0.7710610122,0.3461536229\C,-4.2500666269,-0.8088523562,-0.0423007  
283\C,-4.108765693,-2.2236291946,-0.0419854579\C,-5.1781369752,-0.1885  
941552,-0.9245558776\C,-4.9241414909,-2.9866001181,-0.9001814374\C,-5.  
962175922,-0.9954171599,-1.7672543537\C,-5.8581665704,-2.3977457165,-1  
.7679209217\H,-4.8224561094,-4.078524043,-0.9003579429\H,-6.6786076056  
,-0.5119098912,-2.4420285259\C,7.2808437243,-4.5253862833,1.3597130712  
\H,7.2428899282,-4.6676751125,2.4545676908\H,7.6417000513,-5.457389432  
4,0.8945969668\H,8.0289742206,-3.7332964251,1.1645929757\C,-5.36682202  
74,1.3290675676,-0.9717249867\H,-4.6652886445,1.7823258407,-0.25125578  
45\C,-3.0917097498,-2.9358486195,0.8516101716\C,-6.724897072,-3.252516  
4117,-2.6891629984\H,-6.4614398729,-4.3096273531,-2.4962627347\C,-3.76  
86209849,-3.596389725,2.0708157382\H,-3.0099735405,-4.0482479883,2.736  
7135005\H,-4.3489404421,-2.8661642292,2.6611555863\H,-4.461716886,-4.3  
97181625,1.7517807904\C,-6.4296801852,-2.9611324033,-4.1753063114\H,-6  
.6857304228,-1.9177195039,-4.4364471404\H,-5.3609955117,-3.1153896618,  
-4.4083765881\H,-7.0234791188,-3.6264962348,-4.828806772\C,-8.22618588  
32,-3.0802286478,-2.379528853\H,-8.8346280793,-3.7488879687,-3.0158806  
559\H,-8.4468204316,-3.3178336503,-1.3234178341\H,-8.5566570503,-2.042  
58519,-2.5702340123\C,-5.0267108754,1.8992146517,-2.3640640824\H,-5.72  
45020791,1.5233974911,-3.1350725597\H,-5.09785492,3.0025906727,-2.3563  
391676\H,-4.000168001,1.6228683654,-2.6575657891\C,-6.7892667621,1.731  
3066641,-0.5291389607\H,-6.8935278621,2.8318590828,-0.5115553961\H,-7.  
5547097155,1.3315309926,-1.2194931686\H,-7.014678416,1.3510846903,0.48  
3633783\C,6.4250685789,0.0420162889,-2.1830509756\H,6.3155992244,-0.22  
35917779,-3.2516301432\C,2.0698665338,2.3452811992,-3.4827586329\H,1.0  
677932073,2.4083446151,-3.0259146249\C,3.4832010364,2.1003838708,1.445  
197646\H,2.7695391524,2.9402459658,1.4787391811\C,7.6399725895,0.98626  
24145,-2.0593331128\H,8.5630900026,0.4855202694,-2.405384494\H,7.49758  
43211,1.9003667531,-2.6630923069\H,7.7943398994,1.2948202582,-1.008594  
6481\C,6.6553054476,-1.2626001646,-1.3978878148\H,6.8354923889,-1.0630  
792762,-0.3264254354\H,5.7846232352,-1.9361296597,-1.4744016251\H,7.53  
92094338,-1.7999512593,-1.7874677959\C,2.8181777753,0.9237461272,2.190  
1733562\H,1.9188466667,0.572270409,1.6600839697\H,3.5164090506,0.07300  
00886,2.285710205\H,2.5165140757,1.227627303,3.2092513841\C,4.75714359  
63,2.5649318931,2.1744827988\H,5.2387068051,3.4078036155,1.6468914025\  
H,4.5053162574,2.9007900485,3.1968148067\H,5.500552398,1.7525052859,2.  
2695350874\C,2.4776822517,3.760586284,-3.948047293\H,2.499154088,4.470  
5727312,-3.1027995109\H,3.4842486669,3.749198229,-4.4068455856\H,1.763  
155816,4.1453168575,-4.6991644894\C,1.9473963067,1.3892750201,-4.68153  
52958\H,1.1426325746,1.7353715142,-5.3538952296\H,2.8786762338,1.34504  
49484,-5.2761192869\H,1.6882714666,0.370027708,-4.3503967044\C,-2.2476  
695857,-3.9664876052,0.0763375963\H,-2.8574564137,-4.8226390019,-0.266  
0441442\H,-1.7741674885,-3.4955625784,-0.8000841286\H,-1.4523245393,-4  
.368326796,0.7294674457\H,-2.3959958173,-2.1690770876,1.2294986382\C,-  
0.0164626857,-3.0615167708,5.3717377863\C,-0.7479310162,-2.0636162822,  
6.0974054063\H,-0.8274886103,-2.4418833167,7.1273751538\H,-0.212035534  
,-1.0967966004,6.0986988454\H,-1.7599953536,-1.9266737162,5.6748175502  
\Version=ES64L-G09RevD.01\State=1-A\HF=-3330.5886762\RMSD=4.835e-09\R  
MSF=2.062e-06\Dipole=3.8962574,-3.2043716,3.7832031\Quadrupole=8.84114  
97,2.1698567,-11.0110064,-21.2622281,-9.6396202,11.342079\PG=C01 [X(C6  
6H74N1O5P1)]\@

Z-3b/1c (Type II; conf2)

1\1\GINC-LOGIN\FOpt\RTPSSSTPSS\def2SVP\W06\C66H74N1O5P1\JHIOE\30-Jul-20  
16\0\#p tpsstps\def2svp/w06 densityfit empiricaldispersion=gd3 opt s  
crf=(smd,solvent=ch2cl2,read)\title\0,1\p,-0.7706103265,0.2281303477  
, -1.6363889126\O, -2.062721019, 1.1044517215, -1.0264743863\O, 0.421866714  
7, 0.6653134935, -0.5094944737\O, -0.5256441859, 0.7616453501, -3.015233654  
8\O, -0.9460474136, -1.2606768115, -1.3373064193\C, -1.5228188817, 1.800515  
0777, 1.192677858\C, -2.3323961289, 1.0634234868, 0.3249051398\C, -3.468825  
1595, 0.3098130954, 0.7574743518\C, -3.7697719938, 0.318896688, 2.112605171  
6\H, -4.6523329372, -0.2195807564, 2.4722453657\C, -2.9388168211, 0.9787876  
116, 3.0624409417\C, -1.7774162073, 1.7053807391, 2.6104219139\C, -0.903623  
3976, 2.2553881479, 3.5967279257\H, 0.0070867538, 2.7686204251, 3.277050046  
9\C, -1.1792805682, 2.1288208675, 4.950680849\H, -0.4854092125, 2.549901045  
2, 5.6864457525\C, -2.3484356519, 1.4530416699, 5.3913401707\H, -2.55801091  
7, 1.3647135998, 6.4627784596\C, -3.2067220006, 0.8866070685, 4.4618914099\H,  
-4.0983427631, 0.3388447492, 4.7873668231\C, -0.3870443765, 2.6029386999  
, 0.6531205428\C, 0.5917248207, 1.9797531143, -0.1306498728\C, 1.8422176392  
, 2.6046978194, -0.4395045955\C, 2.0181069955, 3.9298176159, -0.06823379\H,  
2.9684659446, 4.4282418649, -0.284723457\C, 0.994012399, 4.6677955009, 0.59  
25725601\C, -0.2283813363, 4.0016417815, 0.9657700946\C, -1.2457917556, 4.7  
68389487, 1.6110264576\H, -2.1929644369, 4.2863442112, 1.8709919709\C, -1.0  
563486557, 6.1130432297, 1.8952392781\H, -1.8552897636, 6.6826708583, 2.382  
6786014\C, 0.160722845, 6.7602448738, 1.5512915444\H, 0.2995162753, 7.82130  
87562, 1.7858478004\C, 1.1621534239, 6.0495384274, 0.9087095157\H, 2.100247  
7815, 6.5404326746, 0.6254658692\C, 5.6938719969, -3.9879159917, 1.38787752  
55\C, 4.8972152886, -2.9652822006, 1.9527761657\H, 5.2338312076, -2.4597314  
531, 2.8650021904\C, 3.6906346119, -2.5815809464, 1.3686658252\H, 3.1007125  
117, -1.7819037419, 1.8225032881\C, 3.2483178176, -3.1916611535, 0.16966526  
73\C, 4.0480774974, -4.1984844578, -0.4114238246\H, 3.729444105, -4.6870792  
358, -1.3371032037\C, 5.2406520921, -4.5998778409, 0.2026726911\H, 5.837719  
3154, -5.3955756169, -0.2562110353\C, 2.0286525343, -2.713789861, -0.510474  
7162\C, 2.0668887879, -2.4769526525, -1.9888102232\H, 1.0820827581, -2.1774  
907102, -2.375087767\H, 2.4118827088, -3.3863426696, -2.5104480258\H, 2.808  
2421375, -1.6845079214, -2.1997558671\N, 0.922887008, -2.4035150948, 0.1240  
137849\H, 0.1517127321, -1.9253337695, -0.4677073728\C, 0.5687313344, -2.60  
21197276, 1.4896279382\C, -0.1654382221, -1.5879070559, 2.126186288\H, -0.4  
130299938, -0.6748810185, 1.5780892013\C, -0.5686949739, -1.7334930869, 3.4  
582215195\H, -1.1263806663, -0.9245719831, 3.9344723256\C, -0.2593657182, -  
2.9193678782, 4.1560959061\C, 0.4532523147, -3.9517493865, 3.4996648607\H,  
0.6627800007, -4.8762710554, 4.0463713218\C, 0.8648992618, -3.7967444003, 2  
.1787254572\H, 1.3978152844, -4.6067351923, 1.6738164311\C, 2.9564860768, 1  
.8087069056, -1.0573241464\C, 3.0877479398, 1.7556564245, -2.4723486907\C,  
3.8870121883, 1.11732007, -0.2300311603\C, 4.1394002318, 1.0073457673, -3.0  
345108235\C, 4.9163845369, 0.3793419358, -0.848742508\C, 5.0657392546, 0.30  
87378903, -2.2437531947\H, 4.2455910209, 0.9666828754, -4.1242356245\H, 5.6  
250114576, -0.1558120628, -0.2044572934\C, -4.3001760864, -0.4533899542, -0  
.2283071232\C, -4.2928629049, -1.877751061, -0.2149475015\C, -5.1083652641  
, 0.2426305036, -1.1663914502\C, -5.1262614081, -2.5679357541, -1.112689268  
9\C, -5.9168338609, -0.4971505981, -2.0505293377\C, -5.950095647, -1.900401  
7821, -2.0364672257\H, -5.1248255295, -3.6637433053, -1.0958031996\H, -6.54  
86291596, 0.0380347813, -2.7701933961\C, 6.9949932891, -4.3913458249, 2.036  
6366266\H, 6.8285318062, -4.7334864835, 3.0747976892\H, 7.4926997, -5.20181  
01283, 1.4794749046\H, 7.687255537, -3.5307263585, 2.0905970574\C, -5.15167  
11974, 1.7705061292, -1.228406005\H, -4.4452946189, 2.1614255377, -0.476926  
9505\C, -3.3914787629, -2.6760328267, 0.7294017527\C, -6.846151837, -2.6743

136699,-2.9997698042\H,-7.3952858075,-1.9268320492,-3.6026738452\C,-4.1836640092,-3.274336846,1.9105562303\H,-3.5026441642,-3.8019474041,2.6039099338\H,-4.7156539203,-2.4958381613,2.4843442688\H,-4.935654005,-4.002603028,1.5531487886\C,-7.8879450741,-3.525692694,-2.2454869637\H,-7.3992117876,-4.3086415212,-1.6365954708\H,-8.4988050567,-2.9013292902,-1.5690317107\H,-8.5689185147,-4.0290710317,-2.9561514324\C,-6.0184427152,-3.5419178341,-3.9704835862\H,-6.6774833176,-4.0534878028,-4.696101858\H,-5.2953857955,-2.9283773173,-4.5371588174\H,-5.450714152,-4.3183195052,-3.4252357934\C,-4.6948233879,2.2986352278,-2.603726779\H,-5.3846092455,1.9822283513,-3.4079693586\H,-4.6687135901,3.4040688756,-2.6010933558\H,-3.6835203945,1.9309670228,-2.8459566723\C,-6.5489313915,2.305978708,-0.8521747816\H,-6.5501754886,3.4115534167,-0.8432409098\H,-7.317281714,1.9735608296,-1.5743680709\H,-6.8515124109,1.9555623972,0.1512205767\C,6.2015197878,-0.4862643842,-2.8822828969\H,6.0870059866,-0.3889452273,-3.9781670958\C,2.1462558267,2.5514150891,-3.37811768\H,1.1817445515,2.6396155585,-2.8496372251\C,3.9317874939,1.1620675833,1.3060782099\H,4.5699779298,0.30366484,1.5840991445\C,7.579628249,0.0931874687,-2.5014349048\H,8.3888499445,-0.4524422425,-3.0207105571\H,7.6548546896,1.1608062962,-2.7753486667\H,7.7604090633,0.0075414919,-1.4139405225\C,6.1185358417,-1.9848871481,-2.5304506258\H,6.2411524543,-2.1466206886,-1.4446606578\H,5.1455185064,-2.4120919006,-2.8285549159\H,6.9148405392,-2.5521745552,-3.0464056478\C,4.6642612401,2.4277564975,1.8034977953\H,5.6550525699,2.5301356038,1.3261564065\H,4.0804591923,3.3378982105,1.5809104904\H,4.8130220172,2.3801583178,2.8983518249\C,2.5989570365,0.9714456582,2.0571813284\H,1.9662167583,0.2067963664,1.5793314166\H,2.8032953602,0.6455776162,3.0932843767\H,2.0162838311,1.904708263,2.1164654721\C,2.703010849,3.9731636208,-3.6145094659\H,2.8600094797,4.5131961007,-2.6652119219\H,3.6731583158,3.9295227607,-4.1441816328\H,2.0029868521,4.5662097105,-4.2318000369\C,1.8552038186,1.8618963802,-4.7225580587\H,1.0634132706,2.4145109137,-5.2594115548\H,2.745194183,1.8424297306,-5.3785596233\H,1.4959562369,0.8320131736,-4.5683169873\C,-2.6036087904,-3.7785713199,-0.005754102\H,-3.2675438006,-4.5792980079,-0.3802951208\H,-2.0483215764,-3.3517432226,-0.8560495895\H,-1.8793461335,-4.2471690259,0.6850057015\H,-2.650059046,-1.9731768379,1.1429930684\O,-0.6126270067,-3.163888796,5.4420418758\C,-1.3607721568,-2.1642553588,6.1480394722\H,-1.5389892701,-2.5785127611,7.1515002665\H,-0.7892202191,-1.2216993546,6.2332450677\H,-2.3285986413,-1.9666963652,5.651723329\Version=ES64L-G09RevD.01\State=1-A\HF=-3330.5877388\RMSD=4.171e-09\RMSF=3.663e-06\Dipole=3.6682207,-3.1303958,4.142418\Quadrupole=9.7656674,0.2640206,-10.029688,-19.9089088,-8.0740629,8.2780552\PG=C01 [X(C66H74N1O5P1)]\@

Z-3b/1c (Type II; conf3)

1\1\GINC-WORKER0\FOpt\RTPSSTPSS\def2SVP/W06\C66H74N1O5P1\JHIOE\29-Jul-2016\0\#p tpsstps/def2svp/w06 densityfit empiricaldispersion=gd3 opt scrf=(smd,solvent=ch2cl2,read)\title\0,1\P,-0.796530336,0.0364692014,-1.6726299991\O,-2.1826453865,0.8431732076,-1.1824135791\O,0.3353371145,0.7093768435,-0.5940977091\O,-0.5725563359,0.4359558166,-3.1002880995\O,-0.8469765161,-1.4194955908,-1.211970185\C,-1.7171166011,1.9359941193,0.8853844442\C,-2.4546985179,0.9993636692,0.1597708825\C,-3.526023033,0.2377631478,0.7240787517\C,-3.8098626711,0.4264852669,2.0706171811\H,-4.6378969057,-0.1243158047,2.5282656246\C,-3.0258184094,1.2862810617,2.8920170181\C,-1.947969666,2.043618256,2.3044118044\C,-1.1188509451,2.8210039027,3.1687061198\H,-0.2711048564,3.3676216402,2.7461165953\C,-1.3560781066,2.8692896918,4.5350299038\H,-0.696987047,3.461641329,5.1791769451\C,-2.4406404263,2.1511086171,5.1067561659\H,-2.61984083

72,2.2004543482,6.1862626055\C,-3.2563784068,1.3749419526,4.298209208\  
H,-4.0828068484,0.7981896421,4.7286618949\C,-0.6586568634,2.7386833831  
,0.2084785809\C,0.3948190246,2.0789663584,-0.4314251036\C,1.599504609,  
2.7521157504,-0.8141558799\C,1.6232788147,4.1382360693,-0.7383214664\  
H,2.5389004903,4.6757076084,-1.0078894891\C,0.5008198307,4.8833116349,-  
0.2701684935\C,-0.6494689603,4.1783762036,0.2406585831\C,-1.7504965918  
,4.9410446435,0.7339974738\  
H,-2.6380594592,4.4166019228,1.101265408\C,  
-1.7153089278,6.3278846967,0.7336594713\  
H,-2.5759363271,6.8932218223,1  
.1079141692\C,-0.5752107359,7.021062036,0.2454883185\  
H,-0.5582863641,8  
.1163979562,0.2543126232\C,0.5081442704,6.3102548858,-0.2480872526\  
H,1  
.3903125665,6.8351472481,-0.6321734374\C,6.0867475287,-3.6171272196,1.  
2620533307\C,5.2699826786,-2.5995288171,1.8066038123\  
H,5.644056734,-1.  
9947913008,2.640389895\C,4.0004450845,-2.3392631204,1.2932504457\  
H,3.4  
012462168,-1.5321458176,1.7196828209\C,3.5029023788,-3.0787272836,0.19  
29396978\C,4.3239837467,-4.0808366746,-0.3702201385\  
H,3.9691272698,-4.  
6671884547,-1.2229776459\C,5.585588541,-4.3535702977,0.1701966339\  
H,6.  
1980150474,-5.1472067745,-0.2717382132\C,2.2160504509,-2.7266865499,-0  
.4334282201\C,2.121365813,-2.7096011744,-1.9300038382\  
H,1.10659414,-2.  
4503137126,-2.2642698858\  
H,2.4027935373,-3.6961059658,-2.3374709829\  
H,2.8457027185,-1.9761908635,-2.3266819379\  
H,1.1490840994,-2.3465232437,  
0.2325800235\  
H,0.3379817386,-1.9620636698,-0.3691515636\C,0.8460230203  
, -2.36083357,1.6225775694\C,0.0051893661,-1.3409822096,2.1014431888\  
H,  
-0.3352238211,-0.5574598791,1.4198580615\C,-0.3950217324,-1.3154314837  
,3.4409618503\  
H,-1.0417687389,-0.5046526212,3.7830157926\C,0.027647809  
5,-2.3389666674,4.3139548439\C,0.8571879441,-3.3770998594,3.8234477156  
\  
H,1.157979328,-4.1760978435,4.5080090404\C,1.2636659161,-3.3912705351  
,2.4918016102\  
H,1.8843096531,-4.2107652937,2.1203346227\C,2.8371299107  
,1.938101692,-1.0581584147\C,3.1541947271,1.4120978744,-2.3353257156\C  
,3.6747592757,1.6612159972,0.0615134882\C,4.2837603239,0.5802063161,-2  
.4679188705\C,4.7814771195,0.813891815,-0.1217834226\C,5.0988835218,0.  
2512547961,-1.3715560708\  
H,4.5246637595,0.1721428575,-3.4537140506\  
H,5  
.4154606286,0.567730813,0.7376762544\C,-4.306036752,-0.7252072058,-0.1  
171052819\C,-4.2241602642,-2.1239572523,0.1396304234\C,-5.1438976236,-  
0.2446728053,-1.1598221914\C,-5.010624856,-3.0025928375,-0.6267059497\  
C,-5.9026009059,-1.1680377161,-1.9037730103\C,-5.8589952754,-2.5484857  
463,-1.6518653975\  
H,-4.9472094784,-4.0781357998,-0.4245591212\  
H,-6.554  
5366467,-0.7999370255,-2.7057785592\C,7.4651380696,-3.8737695128,1.817  
9265039\  
H,7.4401283643,-3.968100322,2.9183656645\  
H,7.909682465,-4.7894  
856704,1.3950154945\  
H,8.138215154,-3.027223691,1.5834407354\C,-5.2716  
68204,1.2451483665,-1.4825652853\  
H,-4.5919738491,1.7977450214,-0.81274  
99117\C,-3.2869328925,-2.7015575152,1.2024631706\C,-6.6870709489,-3.52  
3520347,-2.4845593458\  
H,-7.2915023839,-2.918111161,-3.1861517967\C,-4.  
0597572674,-3.200764133,2.4405671465\  
H,-3.3564546458,-3.553834969,3.21  
78506078\  
H,-4.6813332645,-2.4017001908,2.8812091265\  
H,-4.7288844681,-4  
.0419787282,2.1795075252\C,-7.6603089747,-4.3425561679,-1.6127394245\  
H  
, -7.1136724248,-4.9815925023,-0.8950821556\  
H,-8.3329795202,-3.68280985  
49,-1.0358104544\  
H,-8.2849713132,-5.0033771429,-2.2414848779\C,-5.7814  
983398,-4.4476504611,-3.3250736116\  
H,-6.3888312374,-5.1085433285,-3.97  
05689414\  
H,-5.1066115333,-3.8598312548,-3.9724867376\  
H,-5.1560235478,-  
5.0895717384,-2.6773209002\C,-4.8382959217,1.5563082539,-2.9295982551\  
H,  
-5.5104325195,1.0773563446,-3.6652876826\  
H,-4.8664121867,2.646777007  
3,-3.1106853527\  
H,-3.8093778557,1.2044246133,-3.1130538128\C,-6.698355  
7304,1.7607513454,-1.1990254618\  
H,-6.7571988655,2.8507246488,-1.375112  
435\  
H,-7.4430377539,1.2732667212,-1.8551033706\  
H,-6.9913871112,1.56782  
7887,-0.1510998013\C,6.3222100647,-0.6560131796,-1.4939429563\  
H,6.3877  
114727,-1.2190563054,-0.5430508973\C,2.3146633581,1.7896566919,-3.5549

020337\H,1.283130769,1.9579936403,-3.2007968183\C,3.3650535832,2.22709  
5147,1.4525310763\H,2.7326571086,3.1189374017,1.3085999926\C,6.2288518  
342,-1.6841272405,-2.6336690006\H,7.0665863688,-2.4010356879,-2.565791  
8516\H,5.2874102504,-2.258715138,-2.5851625613\H,6.2855849485,-1.20280  
76164,-3.6272103884\C,7.6087170353,0.189674227,-1.6201436814\H,7.58917  
07469,0.7925844646,-2.5470212991\H,7.7158360187,0.8834211786,-0.767292  
9692\H,8.5043971239,-0.4580376319,-1.6505289832\C,2.5413474964,1.22884  
50895,2.2932221573\H,1.6562033935,0.878413285,1.7397394599\H,3.1464228  
929,0.3441450155,2.5611908\H,2.1960224242,1.6969105182,3.2328729618\C,  
4.6220490669,2.6844080965,2.2146619932\H,5.2229195672,3.3910091572,1.6  
143444549\H,4.330716737,3.1929028959,3.1515403957\H,5.2708592433,1.833  
9409673,2.4923489025\C,2.8311167934,3.1083753958,-4.1707560421\H,2.813  
9797461,3.9316045898,-3.4351605035\H,3.8715596525,2.9952331938,-4.5290  
130006\H,2.2032981657,3.4072253053,-5.030498498\C,2.2382215858,0.68314  
5352,-4.6197970654\H,1.5116461139,0.966112638,-5.4017989414\H,3.211064  
9714,0.5156921535,-5.118578042\H,1.8967784309,-0.2676734583,-4.1782561  
726\C,-2.3818068426,-3.8136072757,0.6357702354\H,-2.9635641868,-4.7084  
398336,0.3474875014\H,-1.8328318589,-3.4496065786,-0.247895408\H,-1.64  
76637582,-4.1284538055,1.3995663467\H,-2.6232960714,-1.8864832566,1.53  
24606963\O,-0.3186453446,-2.4201253649,5.6218032607\C,-1.1902737791,-1  
.4168621351,6.16219721\H,-1.3457135037,-1.6927740578,7.215667451\H,-0.  
7286501056,-0.413905314,6.1077204168\H,-2.1618837582,-1.4074156929,5.6  
346747039\Version=ES64L-G09RevD.01\State=1-A\HF=-3330.5892234\RMSE=7.  
606e-09\RMSF=2.673e-06\Dipole=3.8467037,-2.6409154,4.1924022\Quadrupol  
e=12.669229,1.5451226,-14.2143516,-21.5967494,-7.4282704,8.8953989\PG=  
C01 [X(C66H74N1O5P1)]\@

Z-3b/1c (Type I; conf0)

1\1\GINC-WORKER0\FOpt\RTPSSTPSS\def2SVP/W06\C66H74N1O5P1\JHIOE\30-Jul-  
2016\0\#p tpsstps\def2svp/w06 densityfit empiricaldispersion=gd3 opt  
scrf=(smd,solvent=ch2cl2,read)\title\0,1\P,-0.9538144492,-0.1981997  
607,-1.4122795383\O,-2.4358543877,0.5151881382,-1.0861483794\O,0.06646  
66744,0.792650294,-0.4827337352\O,-0.7325571958,-0.0443216919,-2.88753  
83899\O,-0.8417100737,-1.5348150331,-0.6809777159\C,-2.1544780115,1.92  
97700537,0.8113283312\C,-2.7638702644,0.8234274061,0.2177639276\C,-3.7  
662379723,0.0368063888,0.8677034384\C,-4.0889836335,0.3636995837,2.179  
3913798\H,-4.8649379188,-0.2075627321,2.7002522908\C,-3.4213286593,1.4  
094507966,2.8811221382\C,-2.4304816645,2.2052500507,2.1978661467\C,-1.  
7363316462,3.2080146628,2.9407526828\H,-0.95646211,3.7949471336,2.4465  
16678\C,-2.0246203601,3.4336724262,4.27886642\H,-1.4728019104,4.202725  
8829,4.8306125785\C,-3.0251080485,2.6727230948,4.9412244115\H,-3.24864  
77738,2.8662443924,5.9960456403\C,-3.7052474765,1.6792693351,4.2541250  
498\H,-4.4679579934,1.074745352,4.758300677\C,-1.2036876375,2.76184256  
79,0.0197990684\C,-0.0716412829,2.1644905469,-0.5425298834\C,1.0144521  
901,2.9283480139,-1.0756093496\C,0.8473880495,4.3008945165,-1.20064569  
43\H,1.671809567,4.9100567108,-1.5866142455\C,-0.3592631159,4.94833255  
6,-0.8039571251\C,-1.3969385635,4.1774318557,-0.1632856814\C,-2.591775  
2533,4.8489612222,0.236582543\H,-3.3978391522,4.2714044165,0.699242785  
7\C,-2.7488864924,6.2116594286,0.0295829743\H,-3.6785213644,6.70398536  
91,0.3356907876\C,-1.7177146255,6.9730449612,-0.5834431024\H,-1.852612  
3827,8.0492193634,-0.7377701223\C,-0.5487888095,6.3502584978,-0.992752  
4428\H,0.2501938689,6.92573828,-1.474050436\C,4.9221517067,-1.91195875  
36,4.4472354509\C,5.0016867482,-1.4721342338,3.1056188027\H,5.96099535  
08,-1.1225022107,2.7079848216\C,3.8808819582,-1.4668071861,2.277358978  
7\H,3.9746802155,-1.0989149575,1.2526464977\C,2.6198172018,-1.88564785



81,2.7712688706\C,2.5279244604,-2.2979792512,4.1187988301\H,1.56624613  
34,-2.6177611337,4.5309615934\C,3.6664659503,-2.3275796623,4.932881330  
7\H,3.5752334198,-2.6693086074,5.9697688677\C,1.4028719349,-1.78871837  
27,1.9448844424\C,0.1142452682,-1.351204868,2.5764777961\H,-0.64362752  
96,-1.1448653307,1.8073796484\H,0.2798696675,-0.4569132824,3.198991642  
5\H,-0.2620425808,-2.1506514584,3.2407988525\N,1.3748701669,-2.0208271  
297,0.6532197523\H,0.4501241097,-1.7897833128,0.1399129621\C,2.3786531  
213,-2.5518745877,-0.2081448493\C,2.532736475,-1.954235577,-1.47529890  
7\H,1.9275839062,-1.0868636531,-1.7511558658\C,3.4938894366,-2.4362305  
667,-2.3595658452\H,3.6394779319,-1.9650947605,-3.3353647309\C,4.32009  
16784,-3.5209557168,-1.9931388259\C,4.1355437706,-4.1457310991,-0.7388  
583945\H,4.7372560112,-5.0091226474,-0.4453036392\C,3.164549452,-3.662  
0417866,0.1447769457\H,3.0195395399,-4.1530978864,1.1110827155\C,2.340  
4070251,2.2601994997,-1.2941392434\C,2.7053435922,1.7109799681,-2.5493  
951187\C,3.2292943658,2.1739823303,-0.1852933463\C,3.9466952414,1.0582  
554447,-2.6632554562\C,4.4489073985,1.4895841142,-0.346117129\C,4.8228  
213188,0.9148328345,-1.5738941702\H,4.2386926786,0.6277164796,-3.62732  
79195\H,5.1257103351,1.4075752913,0.5107368727\C,-4.4551857949,-1.0733  
311189,0.1341458693\C,-4.2857377091,-2.4258295397,0.5447838908\C,-5.30  
2035716,-0.7710334762,-0.9680271469\C,-4.9883357821,-3.4377275663,-0.1  
341730588\C,-5.9734795852,-1.8224784616,-1.6197558291\C,-5.8389392057,  
-3.1612322946,-1.21846774\H,-4.8582819846,-4.4765733366,0.1912050326\H  
, -6.6308924552,-1.591434906,-2.4670767476\C,6.1517327968,-1.9280887128  
,5.3208327867\C,-5.5410475047,0.6620957942,-1.448443655\H,-4.917087438  
5,1.3359903222,-0.8383230516\C,-3.3458465806,-2.8240332839,1.684829096  
\C,-6.5988922759,-4.274211564,-1.9350590789\H,-7.166329437,-3.79990717  
82,-2.7578207086\C,-4.1290677705,-3.3163280915,2.9189286565\H,-3.43754  
1935,-3.554935146,3.7484124889\H,-4.8393091942,-2.5497573771,3.2769980  
085\H,-4.7070415628,-4.2303654589,2.6876801346\C,-7.617146695,-4.95261  
9775,-0.9952185773\H,-7.1079906712,-5.4570032336,-0.1530927124\H,-8.32  
23095989,-4.2146509593,-0.572351907\H,-8.2042401859,-5.7157394287,-1.5  
388098424\C,-5.6432076537,-5.3103980237,-2.5609228774\H,-6.210231619,-  
6.0720148326,-3.1270774374\H,-4.9302696757,-4.8286342711,-3.2535453069  
\H,-5.0586549413,-5.8363738238,-1.783855554\C,-5.1150554245,0.85180761  
89,-2.9181625563\H,-5.7383427748,0.2462869446,-3.6016988412\H,-5.22491  
4061,1.9112162602,-3.2151732983\H,-4.0597966514,0.5631920457,-3.058167  
493\C,-7.0077467088,1.0862446544,-1.2240336575\H,-7.1549642905,2.14145  
47813,-1.5196046384\H,-7.7035107849,0.4684812281,-1.8212626374\H,-7.29  
18670388,0.9860808878,-0.1607779014\C,6.1514133587,0.1831507647,-1.752  
490624\H,6.0586107556,-0.4239084434,-2.6730366454\C,1.7854172626,1.860  
2778339,-3.7607519515\H,0.753964255,1.9279314382,-3.3735828362\C,2.864  
4660239,2.7929875274,1.1695739765\H,2.132901935,3.5951620772,0.9724823  
029\C,7.3022732928,1.1893855209,-1.9687923128\H,8.2570878522,0.6629101  
387,-2.152769772\H,7.0993009437,1.8459476516,-2.8335973709\H,7.4329089  
219,1.8315451926,-1.0778949419\C,6.468208632,-0.7805235278,-0.59392555  
8\H,6.6624462982,-0.2349161313,0.347189367\H,5.6351441274,-1.482493991  
7,-0.4194337236\H,7.371139831,-1.3749720578,-0.8237397578\C,2.17252839  
49,1.767167585,2.0925901309\H,1.3303210187,1.2712214866,1.5844171928\H  
,2.8857383436,0.9861170267,2.406266246\H,1.7855768388,2.2602058697,3.0  
03168192\C,4.0649582516,3.4406142318,1.883228998\H,4.5815111036,4.1664  
63469,1.2297245531\H,3.7217446097,3.9760570888,2.7868479207\H,4.804358  
7144,2.6871838369,2.2108240224\C,2.1069256965,3.1676061121,-4.51714078  
25\H,2.0159270006,4.0478466901,-3.8572824262\H,3.139002924,3.147495744  
1,-4.9147711323\H,1.4147088738,3.3062637108,-5.368114437\C,1.821266672  
7,0.653301359,-4.7138486575\H,1.0557499249,0.7756562899,-5.5009480208\  
H,2.7989182496,0.5496797877,-5.220060376\H,1.5949061193,-0.281892439,-

4.1761148373\C,-2.3064903938,-3.8678117967,1.2274196553\H,-2.783766044  
,-4.826938047,0.9547008653\H,-1.7457170274,-3.4907423557,0.3565409442\  
H,-1.5884839165,-4.0769001119,2.0418069379\H,-2.7886385127,-1.92217913  
53,1.9853668597\O,5.2586172335,-3.8829485688,-2.9027032071\C,6.1650295  
947,-4.9459178636,-2.5813939155\H,5.6286648184,-5.902606711,-2.4400127  
585\H,6.841976343,-5.0306607109,-3.4444386511\H,6.7522533415,-4.710281  
4992,-1.6741778163\H,6.6483421157,-0.9408336416,5.3195441484\H,6.89090  
39524,-2.657922877,4.9401928642\H,5.9079165981,-2.1967253532,6.3616722  
844\\Version=ES64L-G09RevD.01\State=1-A\HF=-3330.584634\RMSD=3.858e-09  
\RMSF=3.176e-06\Dipole=4.9085413,-2.5701215,4.9455852\Quadrupole=13.66  
95448,-0.2270463,-13.4424985,-26.1773254,4.6504806,-6.4477645\PG=C01 [  
X(C66H74N1O5P1)]\@

Z-3b/1c (Type I; conf1)

1\1\GINC-WORKER0\FOpt\RTPSSTPSS\def2SVP\W06\C66H74N1O5P1\JHIOE\29-Jul-  
2016\0\#p tpsstps/def2svp/w06 densityfit empiricaldispersion=gd3 opt  
scrf=(smd,solvent=ch2cl2,read)\title\0,1P,-0.9179921885,-0.1103990  
906,-1.3691361324\O,-2.2800536762,0.718300124,-0.8566073319\O,0.267665  
0548,0.6575263909,-0.4257173488\O,-0.7771030247,0.1793162884,-2.833819  
6468\O,-0.9114786239,-1.5247167862,-0.7912957359\C,-1.7254487552,1.849  
7554828,1.1675645286\C,-2.4907774899,0.8952988294,0.4953189913\C,-3.53  
26132875,0.1388396621,1.1193356507\C,-3.7478679216,0.3417860986,2.4767  
983694\H,-4.5512602786,-0.2044814091,2.9822199085\C,-2.9297976756,1.22  
0051105,3.2453333569\C,-1.8894018714,1.9787115366,2.5936941836\C,-1.04  
04237671,2.7948291289,3.4013688844\H,-0.2217689395,3.3452792304,2.9287  
024113\C,-1.2281984752,2.8840008158,4.7730880023\H,-0.5581255183,3.509  
7527185,5.3728910142\C,-2.2778499901,2.1667603595,5.4075526755\H,-2.42  
05511116,2.2523617047,6.4903131096\C,-3.1071791273,1.3491286061,4.6560  
507881\H,-3.9083586064,0.7755685428,5.1361879755\C,-0.7339828595,2.669  
2165713,0.4122572861\C,0.2813817085,2.0322638291,-0.3093307372\C,1.410  
6483063,2.738775313,-0.8334641165\C,1.405355636,4.1250658306,-0.760140  
0654\H,2.2686134079,4.6865867573,-1.1332820792\C,0.3165035058,4.841428  
3331,-0.1829574809\C,-0.7666937872,4.1095598896,0.427271694\C,-1.84589  
16529,4.8494230366,0.999016568\H,-2.6884858076,4.307755847,1.439188065  
8\C,-1.8474511757,6.2365232695,0.987112852\H,-2.6912512566,6.782437260  
9,1.4233212926\C,-0.7681583265,6.9554838132,0.4065867369\H,-0.77936187  
79,8.0509133078,0.40706994\C,0.2894377255,6.2683016438,-0.1685436654\H  
,1.1227630792,6.8116946083,-0.6284508442\C,5.2090477249,-3.2033758232,  
3.6042161885\C,5.2142464943,-2.5663001229,2.341592664\H,6.1662944398,-  
2.2553943835,1.8970687302\C,4.0296087099,-2.3208388621,1.64955484\H,4.  
0685182484,-1.8098763989,0.6844922908\C,2.7804461982,-2.6865944911,2.2  
101214482\C,2.7658370137,-3.2919511258,3.4856674003\H,1.8158923229,-3.  
5760832319,3.948185426\C,3.9638861124,-3.5610353594,4.1582285903\H,3.9  
299125422,-4.0504195145,5.137886902\C,1.5140035423,-2.35057218,1.53413  
41037\C,0.3463590702,-1.8709289421,2.3448658596\H,-0.4493731702,-1.486  
3874978,1.6906991095\H,0.6702606344,-1.0904539948,3.052638633\H,-0.058  
4687141,-2.7084134162,2.9421887245\N,1.3467044358,-2.3992679598,0.2333  
29384\H,0.4115676043,-2.0084949781,-0.1483575096\C,2.1970751254,-2.911  
7786093,-0.788963461\C,2.2776044664,-2.1840868562,-1.9937308765\H,1.74  
07255523,-1.2384062988,-2.1042389315\C,3.0805133252,-2.6452080978,-3.0  
330837105\H,3.1683472996,-2.0770707257,-3.9630223321\C,3.8203886505,-3  
.8387702975,-2.8880609844\C,3.7067646229,-4.5888071677,-1.6953727454\H  
,4.2416632426,-5.5331503454,-1.5698327776\C,2.8937321677,-4.1252358281  
,-0.655325915\H,2.8005729745,-4.7143055338,0.2612522948\C,2.6186201646  
,1.9648002947,-1.2754932707\C,2.784177473,1.5497774594,-2.6219832127\C  
,3.5937023944,1.6283176254,-0.2937349344\C,3.9115209086,0.7764803525,-

2.9536129261\C,4.6949723418,0.8380798953,-0.6754670128\C,4.8654426899,  
0.3891387577,-1.997259786\H,4.0478880214,0.4457152441,-3.9888125629\H,  
5.4383810499,0.5676615169,0.0811712012\C,-4.3594785816,-0.8168590626,0  
.3143394385\C,-4.2931153106,-2.215252744,0.5646608385\C,-5.2227738464,  
-0.3219435909,-0.7046655214\C,-5.1066781578,-3.0808957257,-0.192306276  
2\C,-6.0067833032,-1.2299241886,-1.4365843161\C,-5.9694786908,-2.61495  
71133,-1.1960119888\H,-5.0600041972,-4.159524638,0.0011896208\H,-6.671  
6413716,-0.8413772383,-2.2171588902\C,6.5038118419,-3.489446806,4.3236  
806558\H,7.1304914849,-2.5814397628,4.3855003753\H,6.3274131701,-3.866  
1035097,5.3444378221\H,7.0938671815,-4.247468504,3.7745593746\C,-5.358  
7337402,1.1717755035,-1.0076718057\H,-4.6467562567,1.7180399732,-0.367  
0365607\C,-3.3598995889,-2.8192607174,1.6159633375\C,-6.8242534224,-3.  
5829966246,-2.0091722728\H,-6.6403850152,-4.596230907,-1.6047472684\C,  
-4.1514610693,-3.3541447527,2.8269463489\H,-3.4632555024,-3.7422228425  
,3.6007328866\H,-4.7707924186,-2.5630973416,3.2856976592\H,-4.82486541  
88,-4.1792658975,2.5290097555\C,-6.4033655322,-3.5874982881,-3.4935966  
617\H,-6.5730278768,-2.5988304231,-3.9586703108\H,-5.3318533245,-3.833  
363602,-3.6018339084\H,-6.9867197204,-4.3336234698,-4.064058839\C,-8.3  
297310252,-3.2840492829,-1.8582802854\H,-8.9326654227,-4.0325925345,-2  
.4044294801\H,-8.6368261422,-3.3053973015,-0.7972103343\H,-8.583171491  
4,-2.2876001104,-2.264619068\C,-4.9977164541,1.4946969158,-2.471672787  
2\H,-5.7069255111,1.0234415738,-3.1769500119\H,-5.0324340935,2.5864281  
463,-2.6428508573\H,-3.9803378594,1.1415883593,-2.7095614344\C,-6.7695  
322775,1.6830097924,-0.6469868695\H,-6.8413180984,2.7731113168,-0.8175  
278836\H,-7.5463128785,1.1931154408,-1.2628246903\H,-7.0041990971,1.48  
65213242,0.4148398412\C,6.06062504,-0.4633013586,-2.4182745283\H,5.783  
0234631,-0.9444580402,-3.3754024926\C,1.7833863624,1.9726627637,-3.697  
3616247\H,0.8033169432,2.0790003576,-3.2013252058\C,3.4473994353,2.104  
8002213,1.1566818771\H,2.8543302194,3.0353966788,1.1284545851\C,7.2967  
610769,0.4237605318,-2.6814520718\H,8.1486062672,-0.1833765695,-3.0398  
034933\H,7.0800076725,1.1943872212,-3.4426256176\H,7.6123416882,0.9411  
231532,-1.7561583746\C,6.3869885027,-1.5860549117,-1.4166651775\H,6.76  
63152268,-1.1819145578,-0.4607514408\H,5.4964003499,-2.2007883177,-1.2  
029410563\H,7.1682281985,-2.2513640683,-1.8271814542\C,2.6586038613,1.  
0922889804,2.0155816225\H,1.7074907448,0.8095905212,1.5379876124\H,3.2  
470334528,0.171472951,2.1690933668\H,2.4315044894,1.5202159524,3.00926  
66899\C,4.79188862,2.445137837,1.8248861561\H,5.3795446872,3.156437014  
5,1.217135541\H,4.6154517102,2.9051858978,2.8139941594\H,5.4100142604,  
1.5436830877,1.9897274273\C,2.1823314326,3.3434736093,-4.2861114365\H,  
2.2448726784,4.1171674061,-3.5014440994\H,3.1689902621,3.2844139042,-4  
.7827323861\H,1.4412335669,3.6772535088,-5.0357993838\C,1.6002586982,0  
.9316487044,-4.8150275071\H,0.7792750852,1.2441444946,-5.4849022203\H,  
2.5079768099,0.821851097,-5.4369379876\H,1.3300915134,-0.0519187929,-4  
.3973505343\C,-2.4495114513,-3.9136469265,1.0213429435\H,-3.0312516018  
, -4.7908386627,0.6834694755\H,-1.8800506182,-3.5156483909,0.165547039\  
H,-1.7328959225,-4.2694347674,1.784376767\H,-2.7024346429,-2.012435643  
3,1.9789256497\O,4.6105392928,-4.1748132224,-3.9376625136\C,5.41135703  
69,-5.3606085826,-3.8555365303\H,4.7822172834,-6.2631464891,-3.7439253  
509\H,5.9621121137,-5.4141223415,-4.8062429673\H,6.1298551576,-5.30157  
08108,-3.0166280324\\Version=ES64L-G09RevD.01\State=1-A\HF=-3330.58453  
85\|RMSD=2.563e-09\|RMSF=3.586e-06\|Dipole=4.9264807,-3.6935626,4.0375617  
\|Quadrupole=7.1665909,7.1350027,-14.3015936,-28.23012,-0.8720627,-2.08  
07543\|PG=C01 [X(C66H74N1O5P1)]\|@

Z-3b/1c (Type I; conf2)

1\1\GINC-WORKER0\FOpt\RTSPSSTPSS\def2SVP\W06\C66H74N1O5P1\JHIOE\30-Jul-

2016\0\#p tpsstpps/def2svp/w06 densityfit empiricaldispersion=gd3 opt  
scrf=(smd,solvent=ch2cl2,read)\title\0,1\p,-0.8548459017,-0.3262918  
696,-1.1213116406\O,-2.2120100502,0.6396496223,-0.9793346573\O,0.26993  
10385,0.6148605633,-0.2705207867\O,-0.5458553134,-0.4178277552,-2.5879  
638427\O,-1.0031689784,-1.5622914625,-0.2350395063\C,-1.8223768048,2.1  
62866329,0.8151871786\C,-2.5569656504,1.1066971771,0.2739107574\C,-3.6  
907870657,0.5219310675,0.9194562318\C,-4.0497691147,1.0235397512,2.164  
2455792\H,-4.9295735303,0.6190004652,2.6753954055\C,-3.2854719323,2.03  
43407411,2.8162760013\C,-2.1397950317,2.604177891,2.1498219337\C,-1.35  
09975115,3.5603623165,2.8587339888\H,-0.4548888246,3.9708614552,2.3839  
838715\C,-1.6960866869,3.9619968719,4.1411125629\H,-1.0715439895,4.692  
2128105,4.6675511106\C,-2.848670534,3.430513599,4.779772578\H,-3.11465  
24372,3.7617787967,5.7895269412\C,-3.6220033872,2.4816298091,4.1296608  
983\H,-4.5012180859,2.0477974382,4.6195212482\C,-0.7238540222,2.780288  
1395,0.0175695485\C,0.3256473017,1.9818554161,-0.4547101505\C,1.516269  
884,2.5390448861,-1.0229730899\C,1.5561934631,3.9103780261,-1.23789323  
35\H,2.4654977919,4.362583048,-1.6478905358\C,0.455135707,4.7559475474  
,-0.9198244172\C,-0.7042642735,4.1911128381,-0.2748315998\C,-1.8003069  
473,5.0577290032,0.02181333\H,-2.7010178741,4.6413790625,0.482289574\C  
,-1.7451784262,6.4102791822,-0.2812664877\H,-2.6024204867,7.05304146,-  
0.0523194106\C,-0.5905300722,6.9685557385,-0.8931772611\H,-0.558286264  
7,8.0393068817,-1.1226008505\C,0.4850233966,6.1532957754,-1.2084877879  
\H,1.3767849359,6.5677963786,-1.692337425\C,5.5023766066,-2.3558746612  
,3.6628832544\C,5.323643083,-2.0480166877,2.2939020112\H,6.1966716444,  
-1.8140590768,1.6742373969\C,4.0556150488,-2.0301748652,1.716168222\H,  
3.9480376602,-1.76388638,0.6617120613\C,2.9062431455,-2.3040936249,2.4  
985101454\C,3.0735155628,-2.5724754982,3.874503407\H,2.20167482,-2.770  
4775423,4.5054217462\C,4.3544385331,-2.6146374778,4.4381180701\H,4.464  
3552901,-2.8463408113,5.5033191813\C,1.5570597527,-2.1834934671,1.9201  
11751\C,0.4568224761,-1.5650737466,2.7323099234\H,-0.3832958992,-1.269  
8535564,2.0856424652\H,0.8306384507,-0.698949828,3.2997881095\H,0.0920  
657405,-2.3112443455,3.4638688538\N,1.2483663787,-2.5557527308,0.69716  
23596\H,0.2961072305,-2.1992208307,0.3308941965\C,1.987384575,-3.31077  
30372,-0.2555713333\C,1.822284789,-2.9842538935,-1.6193050168\H,1.1405  
977164,-2.1816093752,-1.9183249563\C,2.5416306735,-3.6742936698,-2.590  
9857605\H,2.4453398695,-3.4112156045,-3.6483911872\C,3.4286337994,-4.7  
096480821,-2.229229649\C,3.5417885669,-5.0800955075,-0.8637576768\H,4  
.1880005351,-5.9056761952,-0.556398106\C,2.821378466,-4.382491689,0.11  
04116034\H,2.9113417246,-4.6774146904,1.1591114488\C,2.7352635607,1.68  
63530017,-1.2293694555\C,2.9660500874,1.0095564826,-2.4569569349\C,3.6  
769431707,1.5887677072,-0.1672752842\C,4.1185272788,0.2133041883,-2.58  
57916635\C,4.8189697093,0.7856917979,-0.3513936043\C,5.0549231578,0.08  
21511259,-1.5439624678\H,4.2953257877,-0.315325621,-3.5283726207\H,5.5  
492557732,0.6993249925,0.4602644369\C,-4.4587920839,-0.5783200048,0.25  
33490761\C,-4.4472164304,-1.8939258191,0.798827013\C,-5.2032072005,-0.  
308492325,-0.9269552009\C,-5.2087378935,-2.8957870996,0.1708962839\C,-  
5.9412929323,-1.3497779589,-1.5206477604\C,-5.9642297265,-2.6486111751  
,-0.9887394033\H,-5.2019039842,-3.9062494389,0.5959694337\H,-6.5221391  
036,-1.1416721132,-2.4276487356\C,6.8853067088,-2.38860222,4.265177558  
1\H,7.3880329536,-1.4110536299,4.1455893598\H,6.8555984288,-2.63526915  
37,5.3390562447\H,7.5178651649,-3.1375003658,3.7534799959\C,-5.2554291  
527,1.0836862806,-1.5599464851\H,-4.5899483208,1.7464466108,-0.9822763  
389\C,-3.6260596452,-2.2592540881,2.03846071\C,-6.7773403237,-3.755531  
3838,-1.6545581157\H,-7.2811145706,-3.3051972444,-2.5305922658\C,-4.53  
23283392,-2.4531407022,3.2726048388\H,-3.9261874645,-2.6719787884,4.17  
14280891\H,-5.135646461,-1.5515981554,3.4788580471\H,-5.229957164,-3.2

977835386,3.1203941501\C,-7.8704262349,-4.3017406477,-0.7132429877\H,-  
7.4260453751,-4.777676817,0.1804061622\H,-8.5419165203,-3.4945903471,-  
0.3694451061\H,-8.4851827545,-5.0628997977,-1.2280935919\C,-5.87000995  
91,-4.8921448282,-2.1692095462\H,-6.46550432,-5.6561483736,-2.70218438  
33\H,-5.1038405905,-4.5070047953,-2.8655329303\H,-5.3473601368,-5.3942  
317443,-1.3341957394\C,-4.7387311772,1.0703545553,-3.0127852445\H,-5.3  
950307297,0.4714974368,-3.6710975197\H,-4.7074859287,2.0988455081,-3.4  
177391737\H,-3.7196501471,0.6511422221,-3.0599996211\C,-6.6732127962,1  
.6863603963,-1.4698358244\H,-6.6846744698,2.711564337,-1.8836129087\H,  
-7.405029007,1.0842881123,-2.0392703866\H,-7.0178765506,1.7378089439,-  
0.4211802029\C,6.3029563678,-0.7832157851,-1.7037999876\H,6.8608805763  
, -0.7239290544,-0.7498676725\C,2.0182652721,1.2048393403,-3.6408016667  
\H,1.0117611983,1.38006541,-3.2238632734\C,3.4480019298,2.3147838549,1  
.1630215814\H,2.83873371,3.208820555,0.9436462749\C,5.9444748064,-2.26  
38296978,-1.9441286461\H,6.857547543,-2.8865830093,-1.9773462977\H,5.2  
946288149,-2.652171739,-1.1417707401\H,5.4113526776,-2.3987367097,-2.9  
02162773\C,7.2248076383,-0.2468577121,-2.8180841769\H,6.7269939994,-0.  
2961414615,-3.8039766081\H,7.5059247794,0.8053547247,-2.6327664777\H,8  
.1528215773,-0.8446044927,-2.8795479323\C,2.6336397468,1.4394153445,2.  
1407075815\H,1.7056731413,1.0719243349,1.6748235836\H,3.2240803725,0.5  
618736497,2.4579660359\H,2.3609692949,2.0150228373,3.0444990117\C,4.74  
68739847,2.8022803291,1.830483576\H,5.3639484504,3.399434073,1.1351033  
919\H,4.5062985189,3.4361764011,2.7030288256\H,5.3624662061,1.96116300  
8,2.1988921176\C,2.4322156151,2.4508209789,-4.4552051429\H,2.457568329  
9,3.3580464401,-3.8274532824\H,3.4388818635,2.3143887001,-4.8932283193  
\H,1.7198658163,2.6284631513,-5.2821072303\C,1.908422356,-0.0217512458  
, -4.5621369448\H,1.1085378334,0.1430350184,-5.3057994954\H,2.844378218  
6,-0.2071814317,-5.1213632891\H,1.6511327683,-0.9274454591,-3.99063536  
47\C,-2.7441683051,-3.5029215315,1.8055940662\H,-3.3516971869,-4.41357  
53534,1.6521880531\H,-2.097896533,-3.354933284,0.9255904504\H,-2.10106  
52473,-3.6832798289,2.6864599343\H,-2.9479134207,-1.4149927522,2.24813  
32384\O,4.1261637707,-5.2812001181,-3.2348594107\C,5.0876954959,-6.298  
8385395,-2.9268214517\H,4.6039772226,-7.1840109714,-2.4738733834\H,5.5  
403944535,-6.5818777088,-3.888679253\H,5.8714415045,-5.9122851031,-2.2  
491564001\\Version=ES64L-G09RevD.01\State=1-A\HF=-3330.5845207\RMSE=1.  
834e-09\RMSF=2.849e-06\Dipole=4.8462064,-3.0239191,4.1496308\Quadrupol  
e=8.8045558,5.4958816,-14.3004374,-28.5555347,5.1668244,-3.4917979\PG=  
C01 [X(C66H74N1O5P1)]\@

Z-3b/1c (Type I; conf3)

1\1\GINC-WORKER1\FOpt\RTPSSTPSS\def2SVP/W06\C66H74N1O5P1\JHIOE\02-Aug-  
2016\0\#p tpsstps/def2svp/w06 densityfit empiricaldispersion=gd3 opt  
scrf=(smd,solvent=ch2cl2,read)\title\0,1\P,-0.9585195027,-0.1658311  
444,-1.3795303403\O,-2.4461560807,0.5383374759,-1.0641135294\O,0.04603  
41871,0.8262851171,-0.43552774\O,-0.7252377569,-0.0027210408,-2.852245  
9814\O,-0.8424993758,-1.5065770314,-0.657009128\C,-2.1927252974,1.9663  
907832,0.828715392\C,-2.7903468842,0.854395498,0.2333986939\C,-3.79985  
09579,0.0683808845,0.8738984942\C,-4.1469083394,0.4053162433,2.1765100  
838\H,-4.9293859902,-0.1643970528,2.6889933191\C,-3.4943182257,1.45845  
43002,2.8810157345\C,-2.4922396522,2.2500856634,2.2093344719\C,-1.8110  
133733,3.2572653607,2.9584157073\H,-1.0223658546,3.8410535071,2.474675  
4632\C,-2.1225406646,3.4914906566,4.2898608937\H,-1.5800141895,4.26380  
48408,4.8462598384\C,-3.134739753,2.735200178,4.9395498388\H,-3.376411  
1728,2.9352841718,5.9891305959\C,-3.8021783816,1.7370741729,4.24699423  
89\H,-4.5726761157,1.1348170295,4.741954356\C,-1.2308867874,2.79629835  
92,0.0479020236\C,-0.0913993841,2.1979665305,-0.4993920372\C,1.0012069

781,2.9604746,-1.0207297902\C,0.8386689527,4.3339726254,-1.1424441866\  
H,1.6675917096,4.9433625043,-1.5181082919\C,-0.3714837876,4.9827332541  
, -0.7601594957\C,-1.4204998621,4.2122034564,-0.1380327923\C,-2.6218285  
621,4.885063378,0.2398476204\H,-3.4377230752,4.3082171829,0.6856718239  
\C,-2.7733249224,6.2482868321,0.0317599033\H,-3.7083868983,6.741197055  
5,0.3199571152\C,-1.7298164023,7.0095378608,-0.5603223697\H,-1.8602194  
062,8.086076578,-0.7157846555\C,-0.554778274,6.3854327522,-0.949049181  
2\H,0.2537112616,6.959740178,-1.4156935879\C,5.0109219858,-1.984519931  
7,4.3560785839\C,5.0647473646,-1.5125329669,3.0242340103\H,6.016145679  
5,-1.1516538266,2.6179376108\C,3.9287471053,-1.4895819333,2.2171224918  
\H,4.0014409401,-1.0970170419,1.1997054885\C,2.6782371515,-1.922056049  
,2.7253670402\C,2.6115311023,-2.3661075203,4.0643879971\H,1.6578236482  
, -2.6968511328,4.4863637907\C,3.7650685212,-2.4131119057,4.8559000567\  
H,3.6941442536,-2.7797888801,5.8858214856\C,1.4479068413,-1.8067077656  
,1.9229044848\C,0.1687015759,-1.3861118213,2.5849011798\H,-0.600775613  
, -1.1576096542,1.8335925876\H,0.3426777587,-0.5117820951,3.2326830424\  
H,-0.1980571162,-2.206365872,3.2290280022\N,1.4000172497,-2.0103170814  
,0.6270373825\H,0.4668441725,-1.7688678034,0.1349490266\C,2.3777111065  
, -2.5437241151,-0.2626306487\C,2.4962691937,-1.9511948,-1.5303222715\H  
,1.9002579369,-1.0701494525,-1.7818627815\C,3.4045785727,-2.4543157732  
, -2.4681101817\H,3.4878436924,-1.9606603104,-3.4384130594\C,4.20659277  
39,-3.5660849031,-2.1376654382\C,4.0652862438,-4.1754680566,-0.8674756  
691\H,4.6769809793,-5.0525445554,-0.6352066806\C,3.1586762713,-3.67323  
04127,0.0618383463\H,3.0444908761,-4.1602892727,1.0341931321\C,2.32813  
13477,2.2943022199,-1.2417465426\C,2.6970349533,1.76432541,-2.50387425  
36\C,3.2187126787,2.2029609039,-0.1337038421\C,3.9488433602,1.13209998  
43,-2.6292507471\C,4.448687654,1.542312596,-0.3071037213\C,4.830885152  
2,0.9939266153,-1.5449522739\H,4.2473483728,0.7218180391,-3.6002377403  
\H,5.1313906831,1.4585690646,0.5453088449\C,-4.4644171806,-1.055358358  
2,0.1386180248\C,-4.2900013481,-2.401957491,0.5668808787\C,-5.28623641  
65,-0.7737848544,-0.9876541047\C,-4.9626329939,-3.4282986131,-0.120588  
6073\C,-5.9290092818,-1.8389113881,-1.6457789461\C,-5.7895071659,-3.17  
20211082,-1.2279054659\H,-4.8295540148,-4.4625465466,0.2176237131\H,-6  
.5691734299,-1.6228563105,-2.5100504383\C,6.2570493566,-2.0186191305,5  
.2052926835\C,-5.5319572566,0.6523837709,-1.4854070704\H,-4.9243709385  
,1.3379131725,-0.8717425242\C,-3.3821882291,-2.7781866225,1.7398327813  
\C,-6.515922142,-4.301257191,-1.953288522\H,-7.0994999651,-3.837349392  
6,-2.7706076881\C,-4.2027600188,-3.2574532312,2.9547225306\H,-3.538137  
1058,-3.4756718476,3.8112024064\H,-4.9322532048,-2.4921860675,3.274234  
5249\H,-4.7638884304,-4.1806470903,2.7183348523\C,-7.5101243369,-5.023  
5553039,-1.0207312327\H,-6.9841641149,-5.5273312942,-0.1886089729\H,-8  
.2347007176,-4.3131618977,-0.5836581419\H,-8.0768844824,-5.7943221968,  
-1.5749219813\C,-5.5268464699,-5.2979604139,-2.5918303201\H,-6.0692869  
427,-6.0745653223,-3.1618395225\H,-4.8351165173,-4.7850689326,-3.28361  
82655\H,-4.9200604907,-5.8080356387,-1.8210957927\C,-5.0855366846,0.83  
4410886,-2.9503800994\H,-5.6913484721,0.2159801321,-3.638052704\H,-5.2  
036336532,1.8896448694,-3.2587043037\H,-4.0247978448,0.5583186134,-3.0  
728717358\C,-7.0065906957,1.0627063606,-1.2884976496\H,-7.1605026534,2  
.1134507902,-1.5964336929\H,-7.6855117973,0.4317376612,-1.8913359434\H  
, -7.3070498581,0.9692793242,-0.2292233688\C,6.1738856777,0.2908133127,  
-1.7252560129\H,6.1496915858,-0.1905300889,-2.7212553012\C,1.775696117  
3,1.9201513002,-3.7135290493\H,0.7440472609,1.9794414793,-3.3258272696  
\C,2.8454496144,2.7973655855,1.2296340164\H,2.1141586202,3.6021798855,  
1.0411103728\C,7.3360956093,1.306199648,-1.7240326813\H,8.3011337148,0  
.7976853332,-1.9049467437\H,7.1996080644,2.0730630113,-2.5073758094\H,  
7.4037252378,1.825506486,-0.7499233249\C,6.4052271598,-0.8146414483,-0

.6772322809\H,6.5120533047,-0.3909703096,0.337619874\H,5.5688862159,-1.533780986,-0.6631109424\H,7.3318046495,-1.3733885389,-0.9026877218\C,2.1483131571,1.7549278877,2.130111739\H,1.3111890267,1.2662136003,1.6070890403\H,2.860316073,0.9698639111,2.4378462187\H,1.7522335708,2.23372851,3.0444601674\C,4.0398182549,3.4340775473,1.9628368934\H,4.5609395875,4.1708805498,1.3253564908\H,3.6892078371,3.9544222592,2.8724033593\H,4.7776050009,2.6764587323,2.2842580218\C,2.0913921161,3.2352903089,-4.4588666804\H,2.0011732748,4.1091349824,-3.7905696441\H,3.1218459064,3.22158875,-4.8610623302\H,1.3952334791,3.3800240584,-5.3056004222\C,1.8152992003,0.7221414635,-4.6780511428\H,1.0582503692,0.8570478161,-5.4713160103\H,2.7972626526,0.6183878104,-5.1756663723\H,1.5767533384,-0.2162871819,-4.151646643\C,-2.3237614166,-3.8241981018,1.3332240791\H,-2.787444413,-4.7881890241,1.0544326676\H,-1.7308201568,-3.4576684875,0.4789746463\H,-1.6366623353,-4.0215165633,2.1765776625\H,-2.8387640313,-1.8690086246,2.0449813575\O,5.1311749764,-4.1181591183,-2.9609477763\C,5.3247960183,-3.5470739266,-4.2618927221\H,5.6589447292,-2.4952023107,-4.191823561\H,6.1117725246,-4.1503398843,-4.7382411641\H,4.4005924454,-3.604444927,-4.8661511609\H,6.7464583081,-1.0278871306,5.2249722138\H,6.9938789131,-2.7304594756,4.7879524298\H,6.0353111496,-2.3207698294,6.241849241\Version=ES64L-G09RevD.01\State=1-A\HF=-3330.5853193\RMSD=5.246e-09\RMSF=2.881e-06\Dipole=4.5217088,-1.721796,3.9469109\Quadrupole=8.4604244,-10.8333007,2.3728764,-13.4139068,-2.189638,-5.1154541\PG=C01 [X(C66H74N1O5P1)]\@

Z-3b/1c (Type I; conf4)

1\1\GINC-LOGIN\FOpt\RTSPSS\def2SVP/W06\C66H74N1O5P1\JHIOE\02-Aug-2016\0\#p tpsstps/def2svp/w06 densityfit empiricaldispersion=gd3 opt s crf=(smd,solvent=ch2cl2,read)\title\0,1\P,-0.9710538935,-0.2882680073,-1.3041443223\O,-2.4644224594,0.4113856307,-1.0129983685\O,0.0290040744,0.7866261026,-0.4492440442\O,-0.7620065303,-0.2269383604,-2.7879814376\O,-0.8215792035,-1.5715285044,-0.4889873933\C,-2.2159988123,1.9371425747,0.8031511452\C,-2.7935979211,0.7814086341,0.2748637697\C,-3.7629875101,-0.0053603417,0.9737157329\C,-4.1010743633,0.3883844618,2.2621655879\H,-4.8553411071,-0.1780109054,2.8185590219\C,-3.4698766273,1.4953749785,2.9001985482\C,-2.4996413157,2.2795079878,2.1745749368\C,-1.8321268763,3.3363401214,2.8649697196\H,-1.0645891762,3.914074416,2.3419456655\C,-2.1292493745,3.6258987716,4.1889812828\H,-1.5971480621,4.4359593665,4.6998799296\C,-3.11303802,2.8776223331,4.8897650926\H,-3.3441151662,3.1211909071,5.9325173685\C,-3.7647333126,1.8315180146,4.2559649126\H,-4.5116857351,1.2341890742,4.7913068974\C,-1.2874736446,2.749275182,-0.0355943621\C,-0.1460847799,2.1491952474,-0.5790218869\C,0.9162876856,2.9095458231,-1.1638047917\C,0.7237815682,4.2730926362,-1.3399202367\H,1.5308824183,4.8803821465,-1.7633759468\C,-0.4898862528,4.9148821055,-0.9573580266\C,-1.5106063899,4.1512018953,-0.2821174157\C,-2.7185413641,4.8160349609,0.0892091884\H,-3.5138524971,4.2430516879,0.5752841671\C,-2.9020768855,6.1656190711,-0.1742957304\H,-3.8417470672,6.6517726993,0.110355712\C,-1.8852454415,6.921389189,-0.8176331069\H,-2.0404976298,7.9874780759,-1.0162562695\C,-0.7051498858,6.3042854318,-1.2021608032\H,0.0825265171,6.8737599573,-1.7086100626\C,5.1914760449,-1.6328416002,4.351794926\C,5.1931284521,-1.2569243667,2.9884158755\H,6.1286649104,-0.9346891965,2.5178568977\C,4.0261073552,-1.2871933141,2.2276455262\H,4.0600955958,-0.9721982611,1.1818668778\C,2.7959060015,-1.6781805606,2.813520871\C,2.7804387323,-2.0178183413,4.1842613506\H,1.8440297895,-2.3131352044,4.6669248943\C,3.9640796077,-2.0103587104,4.931827332\H,3.9326470292,-2.2998092459,5.988029917\C,1.5388766984,-1.6380265993,2.0454184162\C,0.2735555063,-1.1808184201,2.709737894\H,-0.523

0448438,-1.0318376349,1.9664931947\H,0.4521143901,-0.2488340316,3.2703  
654584\H,-0.0587010611,-1.9432279551,3.4379521454\N,1.4559625563,-1.94  
28556661,0.7713188025\H,0.5057543068,-1.7525529504,0.288462622\C,2.419  
400936,-2.5238418034,-0.1042010873\C,2.4997642983,-2.0168286917,-1.411  
2153765\H,1.8792602101,-1.1680713182,-1.7099580647\C,3.4005726273,-2.5  
634831935,-2.3319133168\H,3.4546971385,-2.1343822496,-3.334538874\C,4.  
2320337159,-3.6344359121,-1.944027088\C,4.1253282051,-4.161963651,-0.6  
343096477\H,4.7587704749,-5.0101728313,-0.357506108\C,3.2273795914,-3.  
615650539,0.2782414749\H,3.143233336,-4.0374254245,1.2835321584\C,2.24  
70786534,2.2556611486,-1.398835762\C,2.5700410065,1.6499353026,-2.6399  
665947\C,3.1822760888,2.2400079308,-0.3245268588\C,3.821208029,1.01931  
17452,-2.7764593949\C,4.412230927,1.5814589687,-0.5081055943\C,4.74829  
60251,0.9571562414,-1.7231036323\H,4.0844592773,0.5514668133,-3.731356  
0605\H,5.12984841,1.5585145931,0.3186945993\C,-4.3903038357,-1.1937545  
178,0.3120568528\C,-4.1482176397,-2.5055988197,0.8046702575\C,-5.24238  
4937,-1.0076333017,-0.8138153993\C,-4.7798964042,-3.595339408,0.173951  
0885\C,-5.8404868437,-2.1299172629,-1.4115015503\C,-5.6293589323,-3.43  
476575,-0.9313522713\H,-4.5999554114,-4.6079065674,0.5552089807\H,-6.5  
003668902,-1.9779216785,-2.2738993964\C,6.4715470398,-1.621354678,5.14  
97928257\H,6.9566291833,-0.6293049534,5.1011916688\H,6.2939327081,-1.8  
734789376,6.2078977683\H,7.1942531728,-2.3499099964,4.7368694695\C,-5.  
5673863846,0.3796634753,-1.3720456725\H,-4.9841697341,1.1232314889,-0.  
8038024988\C,-3.2188071254,-2.7813231324,1.9885450057\C,-6.298889035,-  
4.6382301764,-1.5888570794\H,-5.9920106133,-5.5331055967,-1.015295722\  
C,-4.0161453819,-3.2194611887,3.2345516551\H,-3.3397351798,-3.36786515  
77,4.096735191\H,-4.7707584783,-2.4644581034,3.5178261542\H,-4.5454249  
963,-4.1732017536,3.0519456145\C,-5.8208982174,-4.8279025987,-3.043347  
0138\H,-6.1039188761,-3.9636281667,-3.6722383735\H,-4.722620971,-4.936  
6904131,-3.0905797236\H,-6.2751655624,-5.7321432678,-3.4887895988\C,-7  
.8367526214,-4.5406977555,-1.5182514893\H,-8.3053649196,-5.4486928432,  
-1.9403521682\H,-8.1822502469,-4.4302415704,-0.4746979214\H,-8.2092820  
976,-3.6724221604,-2.0923851915\C,-5.1594949655,0.5129071483,-2.853242  
8769\H,-5.7443865404,-0.1694699657,-3.4973624024\H,-5.339331038,1.5440  
464279,-3.2093443265\H,-4.088152855,0.2862956495,-2.9853054396\C,-7.05  
73859573,0.723416038,-1.162708374\H,-7.2719048308,1.7487681065,-1.5165  
888804\H,-7.7136701222,0.0295176979,-1.719888458\H,-7.3320297472,0.665  
6865728,-0.0939168847\C,6.0955732509,0.2672023489,-1.9217033347\H,6.02  
24771713,-0.3116943788,-2.8620634193\C,1.6038056412,1.7306068062,-3.82  
1665339\H,0.5843174759,1.7788296049,-3.4019892545\C,2.8578100683,2.916  
4349564,1.0127196563\H,2.1331154473,3.7205925415,0.797093238\C,7.22194  
22212,1.307340096,-2.1008123371\H,8.190118089,0.8097900108,-2.29498903  
67\H,7.0074335456,1.9849705466,-2.9463625106\H,7.3332571981,1.92473181  
43,-1.190147497\C,6.4295754789,-0.7212286183,-0.7885853458\H,6.5902533  
011,-0.1959734724,0.1701282285\H,5.6182145072,-1.4551323931,-0.6471077  
609\H,7.3558038861,-1.2774529787,-1.0212226425\C,2.1717384396,1.938677  
5351,1.9914655385\H,1.3136344905,1.4325754956,1.5222261511\H,2.8811014  
172,1.1617391989,2.3254095907\H,1.807930873,2.4753754415,2.8868355357\  
C,4.0808158201,3.5752624831,1.6762815756\H,4.5979002191,4.263581196,0.  
9838300442\H,3.7624997636,4.1562526489,2.5607771821\H,4.8146334146,2.8  
258121519,2.0249134957\C,1.8600272743,3.0214355164,-4.6300952159\H,1.7  
656513056,3.9202512135,-3.9963833022\H,2.8784874175,3.0177113351,-5.06  
18851833\H,1.136274279,3.112394393,-5.4611242813\C,1.6439244578,0.4965  
121725,-4.7391919667\H,0.8445412334,0.5703604351,-5.4980368217\H,2.604  
1774133,0.4096568479,-5.280628057\H,1.4692692995,-0.4277910029,-4.1650  
002956\C,-2.1257161327,-3.8129780041,1.6410792263\H,-2.5553016059,-4.8  
100396028,1.4328312932\H,-1.5519390844,-3.4836437013,0.7595797447\H,-1



.4272225274,-3.9280486905,2.4903896704\H,-2.7071471292,-1.8367499632,2  
.2358317518\O,5.1538696964,-4.2215746443,-2.7458656119\C,5.3229179417,  
-3.724757474,-4.0800616566\H,5.6411362761,-2.6656527558,-4.0740552055\  
H,6.1135455972,-4.342519794,-4.5310873885\H,4.3928024851,-3.8306186853  
, -4.6682564648\\Version=ES64L-G09RevD.01\State=1-A\HF=-3330.585216\RMS  
D=7.410e-09\RMSF=3.123e-06\Dipole=4.643897,-1.3540479,3.9326934\Quadru  
pole=9.1768298,-12.2754904,3.0986607,-13.7149936,-0.871782,-3.7558504\  
PG=C01 [X(C66H74N1O5P1)]\@

Z-3b/1c (Type I; conf5)

1\1\GINC-WORKER1\FOpt\RTPSSTPSS\def2SVP/W06\C66H74N1O5P1\JHIOE\02-Aug-  
2016\0\#p tpsstpss/def2svp/w06 densityfit empiricaldispersion=gd3 opt  
scrf=(smd,solvent=ch2cl2,read)\title\0,1\P,-0.8818915469,-0.3963423  
211,-1.030783087\O,-2.398256343,0.3060919917,-1.0624681175\O,-0.006775  
2397,0.8286149747,-0.2538828914\O,-0.4702634958,-0.5871948005,-2.46263  
443\O,-0.855523466,-1.5342223301,-0.0112103072\C,-2.4073482283,2.08155  
95091,0.5337223084\C,-2.9030933858,0.8497767664,0.102318131\C,-3.95991  
83431,0.1491392251,0.7629334987\C,-4.4947209762,0.7255388972,1.9078663  
127\H,-5.3262630671,0.2329412474,2.4224999144\C,-3.9712410247,1.932238  
4319,2.4561913135\C,-2.8959271731,2.6164885894,1.780206593\C,-2.342931  
4799,3.7805173644,2.3956153521\H,-1.4991485822,4.2877619452,1.91834646  
91\C,-2.8493863781,4.265558749,3.5928382769\H,-2.4037105514,5.15626421  
83,4.0493841225\C,-3.9368262158,3.6144227837,4.2348719645\H,-4.3330945  
385,4.012456327,5.1754357403\C,-4.4803449432,2.4677342536,3.6775978561  
\H,-5.3049479121,1.9433407256,4.1738132389\C,-1.384769182,2.7922003596  
, -0.2871161778\C,-0.182734539,2.1502590842,-0.6111204772\C,0.921569227  
2,2.8426717864,-1.2043029818\C,0.7343482246,4.1655190153,-1.583418952\  
H,1.5724834721,4.7239897563,-2.0135425127\C,-0.5152029751,4.8280131808  
, -1.4154328488\C,-1.5964747892,4.1380087387,-0.7566188981\C,-2.8470968  
815,4.8149232169,-0.6237317799\H,-3.6888528135,4.2946365402,-0.1575367  
457\C,-3.0130015162,6.1101489857,-1.0917485481\H,-3.9849610576,6.60471  
70218,-0.9864373096\C,-1.9364540338,6.7983816414,-1.7135298068\H,-2.07  
92185444,7.8231278907,-2.0736297497\C,-0.7142978207,6.164967905,-1.874  
1504753\H,0.1203339298,6.678585285,-2.364861252\C,5.5380020286,-0.8286  
827778,4.0848313529\C,5.3599487596,-0.6842213887,2.6892252197\H,6.2020  
551707,-0.359813748,2.0675343619\C,4.1295780899,-0.940758908,2.0868645  
608\H,4.0154451096,-0.7937649359,1.0098921759\C,3.0165273849,-1.337637  
699,2.8684428343\C,3.1764930021,-1.4468320738,4.2670871278\H,2.3288182  
066,-1.735395506,4.8960236437\C,4.4237326956,-1.2125697947,4.857919923  
3\H,4.5324211907,-1.321983895,5.9426387848\C,1.6897559629,-1.503646658  
4,2.2520604767\C,0.4708332643,-1.0101109187,2.9752193472\H,-0.37974163  
45,-0.9179215722,2.2829568201\H,0.6731769976,-0.0472950502,3.468998828  
5\H,0.20449761,-1.7400329374,3.7634311994\N,1.4964921999,-2.0329276691  
,1.0636853391\H,0.513211379,-1.8803565849,0.6426413269\C,2.3863233488,  
-2.7404278528,0.2082279674\C,2.2183440504,-2.5843544571,-1.1796284509\  
H,1.4260543218,-1.9384725947,-1.57199344\C,3.068329562,-3.2419709837,-  
2.0751633593\H,2.9323022127,-3.0817391942,-3.1469604604\C,4.0921725659  
, -4.0776575131,-1.5840014931\C,4.2178612434,-4.2803104966,-0.188523036  
7\H,4.9918220615,-4.9626401511,0.1757989635\C,3.3754725177,-3.61994545  
05,0.7003390199\H,3.4795949279,-3.7884051962,1.7752306348\C,2.27654177  
12,2.1984420743,-1.2747023013\C,2.6826717526,1.4556240391,-2.416052059  
7\C,3.1639453523,2.3679775043,-0.1760733683\C,3.9581843111,0.862717557  
9,-2.4198600401\C,4.4323429177,1.758877543,-0.23323626\C,4.846103903,0  
.9947606388,-1.3365298863\H,4.2714538895,0.2844880113,-3.2955427181\H,  
5.121372042,1.8772854868,0.6098937882\C,-4.468420781,-1.1483560712,0.2  
13160523\C,-4.2541243926,-2.3624482848,0.9259506628\C,-5.1678470278,-1

.1687060791,-1.0238178042\C,-4.7787896533,-3.5584233599,0.4042458565\C  
,-5.6660840369,-2.3941176868,-1.5049597667\C,-5.4916565296,-3.59938082  
25,-0.8069563144\H,-4.6167693136,-4.4900998756,0.9587520206\H,-6.21465  
30976,-2.41068186,-2.4548550354\C,6.8842066037,-0.5700125603,4.7149283  
739\H,7.267050428,0.4268976395,4.430100523\H,6.8367380205,-0.626228831  
9,5.814788331\H,7.6271834859,-1.3102836728,4.3631198665\C,-5.425735984  
8,0.1005705269,-1.8380005254\H,-4.9316763368,0.9421025735,-1.324580001  
\C,-3.4630538109,-2.410830489,2.2356932895\C,-6.0525596139,-4.90981703  
75,-1.3524968079\H,-6.5822457839,-4.6678510337,-2.2931981439\C,-4.3989  
268833,-2.5976805442,3.4485322311\H,-3.8219325233,-2.5817935569,4.3918  
64813\H,-5.1600812623,-1.7996504855,3.4998495712\H,-4.9295657854,-3.56  
63791615,3.391374264\C,-7.0770392606,-5.5362492967,-0.3845246326\H,-6.  
6018795752,-5.8162750654,0.5737382063\H,-7.8995081642,-4.8329573019,-0  
.1621711556\H,-7.5173865592,-6.4517401105,-0.8206862161\C,-4.927352018  
8,-5.9093338202,-1.6919874597\H,-5.345034656,-6.8281674893,-2.14331788  
44\H,-4.2073938753,-5.472383797,-2.4068579347\H,-4.3682674012,-6.20346  
24248,-0.7844704756\C,-4.8155427437,0.0064656726,-3.2512787645\H,-5.30  
55045765,-0.7813822946,-3.8528398871\H,-4.9443611532,0.96497985,-3.787  
2236061\H,-3.7364357087,-0.2149317591,-3.1966607126\C,-6.9318146219,0.  
4319750619,-1.8948903833\H,-7.0986613191,1.3781902408,-2.4418947431\H,  
-7.5003181829,-0.3623301524,-2.412831325\H,-7.3535579266,0.5443829622,  
-0.8797299951\C,6.2252813697,0.3389296542,-1.3579614539\H,6.7141605552  
0.5838420543,-0.3959422763\C,1.7799563617,1.364732722,-3.6470156702\H  
0.7376967067,1.409091524,-3.2873412152\C,2.7491608245,3.1713021228,1.  
0611809848\H,1.992366642,3.9050826803,0.7331792534\C,6.1225158664,-1.1  
965067282,-1.4534591654\H,7.1234907527,-1.6619868898,-1.3943793189\H,5  
.5055522463,-1.6081225682,-0.636944296\H,5.6631854693,-1.5081375475,-2  
.4087461907\C,7.1073901686,0.9073284471,-2.488380387\H,6.6758502588,0.  
6825518566,-3.4811521664\H,7.2098004019,2.0040642855,-2.4038649054\H,8  
.11981307,0.4646329544,-2.4539487403\C,2.0751968829,2.2617583462,2.111  
5420429\H,1.2442137534,1.6882681469,1.671080381\H,2.8032116966,1.54120  
27632,2.5246844818\H,1.6741555165,2.8628163415,2.9484871657\C,3.906813  
9444,3.9647411288,1.6944510752\H,4.4260922266,4.5928929713,0.948247594  
6\H,3.5186366027,4.6285395789,2.4880375745\H,4.6557323771,3.3000971312  
,2.1629792141\C,2.0279112399,2.5712279258,-4.5797072303\H,1.8675976783  
,3.5301668062,-4.0578479247\H,3.0667568759,2.5628999589,-4.9600275473\  
H,1.3449639075,2.5379750651,-5.4487338581\C,1.9236843691,0.0482649381,  
-4.4296729147\H,1.1477724253,-0.0044299771,-5.2141159585\H,2.905412654  
2,-0.0314773892,-4.9327588369\H,1.7901846263,-0.8229375795,-3.76926582  
79\C,-2.3683028506,-3.4970219347,2.2173414879\H,-2.7993806527,-4.51374  
19327,2.1689637549\H,-1.6986630787,-3.3542775969,1.3538210003\H,-1.764  
7971528,-3.4407504016,3.14164948\H,-2.9531973696,-1.4394532962,2.35055  
79515\O,4.9950702827,-4.7240058264,-2.3608199919\C,4.9250300135,-4.557  
8959315,-3.7835440393\H,5.0669542939,-3.4993185297,-4.0698837951\H,5.7  
466811036,-5.1624416502,-4.1951717707\H,3.9612663036,-4.9248390907,-4.  
1823724656\\Version=ES64L-G09RevD.01\State=1-A\HF=-3330.5849048\RMSE=2  
.977e-09\RMSE=2.781e-06\Dipole=4.4145081,-1.1633613,3.4989919\Quadrupo  
le=8.4952824,-11.4807671,2.9854848,-13.9893738,3.475207,1.8349872\PG=C  
01 [X(C66H74N1O5P1)]\@

## Solution Phase pno2-pome-ketimine/TRIP

*E*-configuration

E-3c/1c (Type I; conf0)

11\GINC-WORKER0\FOpt\RTPSSTPSS\def2SVP\W06\C65H71N2O7P1\JHIOE\31-Mar-2016\0\#p tpsstps/def2svp/w06 densityfit empiricaldispersion=gd3 opt scrf=(smd,solvent=ch2cl2,read)\title\0,1\p,0.180814199,-0.435846976 2,-1.1767031757\O,-1.2601779042,0.2486629642,-1.6792239942\O,0.7046333 427,0.7724668842,-0.1113152743\O,1.0466911089,-0.5369917775,-2.3982254 563\O,-0.0674752589,-1.6150949646,-0.2379992198\C,-1.7649928484,2.1111 295826,-0.2525893604\C,-2.1210087714,0.8750403463,-0.8018336492\C,-3.4 002630388,0.2681845596,-0.5922012698\C,-4.2955400799,0.9157226086,0.24 97923432\H,-5.2895668884,0.4854611252,0.410502659\C,-3.950574886,2.118 169615,0.930864625\C,-2.6602259931,2.7186491077,0.7014681629\C,-2.3106 321784,3.8781274369,1.4588151894\H,-1.3189558589,4.3214792281,1.329285 4567\C,-3.2015635029,4.4364740309,2.3635435605\H,-2.9067016622,5.32032 40135,2.940000079\C,-4.4896843314,3.8679156683,2.5545960865\H,-5.1861 70057,4.3213609992,3.2683106632\C,-4.8506210774,2.7284819426,1.8544756 539\H,-5.8269921314,2.2600350655,2.0171270548\C,-0.4926916379,2.771748 127,-0.660740177\C,0.7185104458,2.0839523057,-0.548886763\C,1.98966585 35,2.6950314865,-0.7862212809\C,2.0051145825,4.017902863,-1.2060391513 \H,2.9642693747,4.5193671747,-1.3713555902\C,0.8021336226,4.7414263738 ,-1.4506831214\C,-0.4705913631,4.1131588772,-1.192762152\C,-1.65758078 21,4.8390874909,-1.5143909285\H,-2.6311289843,4.3627044278,-1.36788635 16\C,-1.5929632254,6.1277150403,-2.0239039346\H,-2.5181341854,6.660031 4936,-2.2709650235\C,-0.3386257394,6.7596166042,-2.2369857893\H,-0.301 726235,7.7803443403,-2.632981348\C,0.8337844293,6.0748105122,-1.959455 2585\H,1.8087952524,6.5422944226,-2.1382783596\C,-2.3456523984,-0.9224 894201,4.0698697428\C,-1.7267582062,-1.9678767664,4.7672279416\H,-2.25 46574858,-2.4725746299,5.5790471975\C,-0.4428683546,-2.3576075914,4.38 28046125\H,0.0427632823,-3.1867090664,4.9048407105\C,0.1970599638,-1.7 256933217,3.2905569893\C,-0.4339209514,-0.6421428186,2.6378497549\H,0. 0720763438,-0.1104015371,1.8290388191\C,-1.7100874203,-0.2333952097,3. 0292605375\H,-2.2129868979,0.5964641033,2.5278069713\C,1.5228589698,-2 .2226462049,2.8548619163\C,2.5310073539,-2.6002938385,3.8958681698\H,3 .557829283,-2.4581951499,3.521783424\H,2.4181912375,-3.6608964142,4.18 7707086\H,2.3741797192,-1.9880453889,4.7969668381\N,1.7598320354,-2.28 94494164,1.5640724449\H,0.9821526854,-1.9655653432,0.8794546124\C,2.91 36834115,-2.7790575193,0.8912742286\C,3.2897778279,-2.1423770794,-0.31 4061092\H,2.7354590312,-1.2795697793,-0.6911211231\C,4.3991618144,-2.5 893995468,-1.0209596368\H,4.7066845664,-2.0879632695,-1.9419624098\C,5 .1643384036,-3.6776111132,-0.545412264\C,4.7612028154,-4.3482754789,0. 6302725994\H,5.305278856,-5.220637647,0.999371424\C,3.6399603415,-3.90 17724726,1.3365414575\H,3.317681132,-4.4634062827,2.2155083225\C,3.251 3798669,1.9263389811,-0.5361749175\C,4.0499584267,1.4723664813,-1.6199 365356\C,3.6458254221,1.6537849642,0.8030839595\C,5.2318137458,0.76379 31026,-1.3351125524\C,4.8280810773,0.927212527,1.0326222944\C,5.633512 0461,0.4653897423,-0.0226034722\H,5.8492595464,0.4025513108,-2.1662034 376\H,5.1228954817,0.7133068457,2.0640263486\C,-3.7667331347,-0.996614 1809,-1.3074067036\C,-3.986981901,-2.1979672339,-0.5808696506\C,-3.921 641495,-0.9886779574,-2.7238186695\C,-4.3822898215,-3.3545109458,-1.28 14716339\C,-4.3048773158,-2.1733146288,-3.3753755093\C,-4.547641402,-3 .3684449333,-2.6745233132\H,-4.5545136147,-4.2826350226,-0.7222635562\ H,-4.4282994754,-2.1588530177,-4.4647413725\C,-3.7279281636,0.27791432 26,-3.5605210988\H,-3.4012443264,1.0870212924,-2.8869448361\C,-3.75410 94282,-2.2991447479,0.9273459511\C,-4.9585509355,-4.6456551252,-3.4016 287691\H,-5.1386039275,-5.4138012397,-2.6260784819\C,-5.0549234467,-2. 5846379674,1.7033808382\H,-4.8519558883,-2.6574787045,2.7875141796\H,- 5.8006080722,-1.7848586171,1.5488627408\H,-5.5103180446,-3.5407904695, 1.3857944468\C,-3.8263762954,-5.160358269,-4.3149450873\H,-3.598784840

6,-4.4332096538,-5.1163583572\H,-2.8981226796,-5.3325306837,-3.7414434  
892\H,-4.1150483406,-6.1133638224,-4.7954628904\C,-6.2696005576,-4.462  
0295538,-4.1929697573\H,-6.5815875429,-5.4165090917,-4.6552308008\H,-7  
.0880514568,-4.115919149,-3.5366229562\H,-6.1489908825,-3.7209783152,-  
5.0046102929\C,-2.6287201864,0.1008934175,-4.6276071778\H,-2.908080138  
, -0.6648190184,-5.3747993904\H,-2.4648833879,1.050965005,-5.1691381915  
\H,-1.6748359933,-0.1972192068,-4.1610112157\C,-5.0607008555,0.7321274  
496,-4.1923305299\H,-4.9245877635,1.6812610996,-4.7428289917\H,-5.4465  
487506,-0.0196946488,-4.9053500437\H,-5.8326721711,0.8922922984,-3.418  
133577\C,6.9121993651,-0.3373338857,0.2108150255\H,6.9971519264,-1.043  
3554199,-0.637607261\C,3.6642576405,1.7388494646,-3.0764277669\H,2.610  
62133,2.0663184728,-3.0827503284\C,2.8386987682,2.2006622042,1.9830037  
87\H,1.7851468498,2.2694059249,1.6625228475\C,8.1500517676,0.585541933  
5,0.1715384229\H,9.0817553702,-0.0003645333,0.2786339697\H,8.202811494  
8,1.1421659125,-0.7811221275\H,8.1127758343,1.3239437126,0.9939871803\  
C,6.8866676532,-1.1719829957,1.5024356977\H,6.9305207026,-0.5329796914  
,2.4034013761\H,5.9727674567,-1.7886290589,1.5642460664\H,7.7580668703  
, -1.8504631162,1.5364555356\C,2.8703507887,1.2986570262,3.2285196674\H  
,2.6075781416,0.2590187494,2.9725742559\H,3.8646371442,1.2889041682,3.  
7110319649\H,2.1435992251,1.659947291,3.977705603\C,3.3080676456,3.631  
0038662,2.3285117305\H,3.2230584223,4.3007741586,1.4548070152\H,2.6992  
377857,4.0561083185,3.1477375246\H,4.3653847737,3.6261194491,2.6520176  
727\C,4.5215779298,2.8792860217,-3.6662653435\H,4.4252428204,3.8063440  
607,-3.0740848636\H,5.5915530895,2.5991535789,-3.6821993229\H,4.213335  
5884,3.1033545861,-4.7042775452\C,3.7453767843,0.4751026483,-3.9548070  
887\H,3.3966452311,0.7059006413,-4.9784920392\H,4.7796372863,0.0941892  
01,-4.0393670571\H,3.0976756275,-0.3157001654,-3.5438564195\C,-2.66626  
29485,-3.3446075492,1.250102462\H,-2.9870755795,-4.364920018,0.9698375  
431\H,-1.7338453698,-3.1076420947,0.7108038769\H,-2.4519259073,-3.3483  
00031,2.3340835938\H,-3.3760968662,-1.3236273831,1.2713349186\O,6.2570  
367434,-3.9957847481,-1.2775875222\C,7.1152059604,-5.0541484086,-0.826  
9630638\H,6.5780441331,-6.0198250361,-0.799823142\H,7.9304901325,-5.10  
85032422,-1.5632777661\H,7.5314803883,-4.8283411367,0.1722030101\N,-3.  
7372055024,-0.5650154534,4.4208140141\O,-4.3151599283,0.262121383,3.71  
04930012\O,-4.2524573967,-1.1269050884,5.3928850555\\Version=ES64L-G09  
RevD.01\State=1-A\HF=-3495.6818026\RMSD=6.654e-09\RMSF=5.037e-06\Dipol  
e=4.7542558,-3.1727021,4.3601214\Quadrupole=-1.0565846,16.4672826,-15.  
410698,-33.02656,24.9030036,-21.5741027\PG=C01 [X(C65H71N2O7P1)]\@

E-3c/1c (Type I; conf1)

1\1\GINC-LOGIN\FOpt\RTPSS\TPSS\def2SVP/W06\C65H71N2O7P1\JHIOE\01-Apr-20  
16\0\#p tpsstps/def2svp/w06 densityfit empiricaldispersion=gd3 opt s  
crf=(smd,solvent=ch2cl2,read)\title\0,1\P,0.1902506277,-0.3934140773  
, -1.2865375444\O,-1.2348035637,0.3290040309,-1.7808677132\O,0.72234364  
42,0.7718011728,-0.1755958249\O,1.062853124,-0.469771987,-2.5049899006  
\O,-0.0838635159,-1.5931012776,-0.3818585484\C,-1.7115360328,2.1757904  
074,-0.3266517189\C,-2.0879299192,0.9552278467,-0.8961897888\C,-3.3773  
081369,0.3656530022,-0.6985042266\C,-4.2658582893,1.0180181804,0.14640  
66603\H,-5.2670113738,0.6015354684,0.2989369214\C,-3.9045725745,2.2068  
660887,0.8427033332\C,-2.6022261936,2.7876514396,0.6294805413\C,-2.237  
6105658,3.9299022567,1.4059351804\H,-1.2373205233,4.3572822889,1.29026  
15663\C,-3.1247681445,4.490858461,2.3128780706\H,-2.818185138,5.360903  
4807,2.904043082\C,-4.4238980778,3.942694276,2.4876802695\H,-5.1170155  
62,4.3979715761,3.2034853828\C,-4.7998115645,2.8196848421,1.7692070049  
\H,-5.7849412469,2.3656567422,1.9192658441\C,-0.4163353823,2.811654295  
7,-0.702745025\C,0.7763795803,2.0946935218,-0.5716237079\C,2.067005512

5,2.6868311505,-0.740768978\C,2.1238573351,4.0169612328,-1.1335190474\  
H,3.0977344382,4.5039608392,-1.2487499722\C,0.944731432,4.7676948292,-  
1.4110489386\C,-0.3484119095,4.1621971386,-1.2062996404\C,-1.509577423  
6,4.9188240199,-1.5498586842\H,-2.496700044,4.460461313,-1.4412225461\  
C,-1.4023155282,6.2145519311,-2.033770822\H,-2.3079895577,6.7707605024  
,-2.299676711\C,-0.1288629209,6.8229115131,-2.1960675963\H,-0.05834271  
43,7.849436075,-2.572058669\C,1.0198898187,6.1089870402,-1.8936375913\  
H,2.0092712922,6.5594396495,-2.0326394011\C,-2.3687023342,-0.872615432  
,3.9849492914\C,-1.7763428603,-1.9342763128,4.6806861102\H,-2.31224653  
24,-2.4177026645,5.5002358635\C,-0.509648963,-2.3673325956,4.285046032  
5\H,-0.0471052217,-3.2102935309,4.805863019\C,0.1406055998,-1.75877997  
11,3.1855939417\C,-0.4629223627,-0.6581457565,2.5349569873\H,0.0518096  
66,-0.1423206536,1.721367057\C,-1.7222200688,-0.2084611903,2.934961667  
\H,-2.2030758249,0.6359223357,2.4360660559\C,1.4475785245,-2.291582988  
8,2.7386767352\C,2.4377721144,-2.7470264869,3.7652729209\H,3.469480453  
9,-2.6330408643,3.3953202698\H,2.2805485814,-3.8128363832,4.0143703896  
\H,2.3060708266,-2.164756619,4.6897380849\N,1.6908348352,-2.3211180895  
,1.4479182111\H,0.9292171448,-1.9606608287,0.7639641041\C,2.8348260304  
,-2.8232011399,0.7662805941\C,3.2598856562,-2.1332836227,-0.3918682606  
\H,2.7560187182,-1.2196887763,-0.716042549\C,4.3567112508,-2.591011993  
5,-1.1115604413\H,4.7046335514,-2.0491602594,-1.9942478003\C,5.0580849  
004,-3.7448157205,-0.6957490933\C,4.6077350568,-4.4619459609,0.4345370  
406\H,5.1048818476,-5.3794052201,0.757426043\C,3.4998343768,-4.0031567  
176,1.1541780447\H,3.1374903455,-4.5960147059,1.9966055205\C,3.3030388  
929,1.8950072498,-0.4382613859\C,4.1508616102,1.4427437173,-1.48356044  
08\C,3.6216792716,1.5988575906,0.9170471662\C,5.3068086943,0.712957604  
6,-1.1469825828\C,4.7773718222,0.8497071816,1.1976089316\C,5.631366745  
7,0.3890706637,0.1796917081\H,5.9621461528,0.3540808981,-1.9493953045\  
H,5.014877567,0.6162645982,2.2395531995\C,-3.7582696397,-0.8883878442,  
-1.4254347136\C,-3.9866650594,-2.0967061931,-0.7092024008\C,-3.9159955  
785,-0.8658048699,-2.8390360271\C,-4.3883264447,-3.2438940655,-1.41716  
91681\C,-4.3091000726,-2.0443895526,-3.500204493\C,-4.5560781405,-3.24  
37032085,-2.8123382589\H,-4.5617160687,-4.1712205051,-0.8586340607\H,-  
4.4372318694,-2.0266531928,-4.5896828473\C,-3.7154980613,0.4073871214,  
-3.6633150372\H,-3.3798250829,1.2062428246,-2.9818431498\C,-3.75808727  
43,-2.2106293418,0.7987561105\C,-4.9820225537,-4.5043257776,-3.5595810  
449\H,-5.0452808352,-4.2401418794,-4.6319641781\C,-5.0663560533,-2.478  
570673,1.5687333624\H,-4.8685644683,-2.5601897772,2.6532114185\H,-5.79  
91495762,-1.6667067555,1.4155713964\H,-5.5345584744,-3.425963451,1.243  
4668564\C,-6.3772957076,-4.9856675612,-3.1118740381\H,-6.3744087594,-5  
.2822017288,-2.0466361749\H,-7.1344731802,-4.1916163531,-3.2407425396\  
H,-6.6959097092,-5.8634557401,-3.7037157634\C,-3.9352504257,-5.6284247  
246,-3.4154703284\H,-4.2250575296,-6.5097458911,-4.0166948588\H,-2.939  
4213595,-5.292084132,-3.7552569376\H,-3.841777242,-5.9544375127,-2.363  
0093765\C,-2.621612962,0.2342578515,-4.7363219003\H,-2.9088558347,-0.5  
211901843,-5.4908187577\H,-2.4535858005,1.1892676537,-5.2677967195\H,-  
1.667943799,-0.0750659516,-4.2764796665\C,-5.0473590611,0.8786172411,-  
4.2844547432\H,-4.9059273498,1.831720546,-4.8266991342\H,-5.4427246991  
,0.1367263038,-5.0025894508\H,-5.8141321921,1.0379379358,-3.5049162589  
\C,6.8775078614,-0.4410468401,0.4800638165\H,7.0784803402,-1.044374269  
2,-0.4259254384\C,3.8377813666,1.7226703075,-2.9547019499\H,2.79064578  
86,2.066706873,-3.0075329242\C,2.7568328443,2.1356618465,2.0602480363\  
H,1.7170639848,2.1884857328,1.6945696935\C,8.1000856529,0.4726276283,0  
.7148667049\H,9.0139075769,-0.1267804466,0.8834407652\H,8.2782256242,1  
.1331415028,-0.1525217179\H,7.942182783,1.113338412,1.6023913115\C,6.6  
839863697,-1.418748509,1.6534708343\H,6.6114291172,-0.8890216977,2.620

9496299\H,5.7681059032,-2.0209717266,1.5239739152\H,7.5416844747,-2.11  
22607778,1.7213401226\C,2.7477556257,1.2350476185,3.3071217913\H,2.524  
908873,0.1884927378,3.0409238277\H,3.7162309516,1.2509815933,3.8392756  
913\H,1.9753020818,1.579508459,4.0172572936\C,3.1882754584,3.573087833  
8,2.4254393498\H,3.1296578309,4.2427170445,1.5495615307\H,2.5383411983  
,3.9873504984,3.2181882627\H,4.2306682784,3.5841403244,2.7939821409\C,  
4.7390848475,2.8507417931,-3.5004002945\H,4.6270644941,3.7784262003,-2  
.9119190082\H,5.8044380286,2.5551641864,-3.4653612808\H,4.4842158884,3  
.0805345395,-4.5514811765\C,3.9379015566,0.459754678,-3.8324433553\H,3  
.6285830605,0.6959712441,-4.8674346857\H,4.9706734328,0.0684760671,-3.  
8800328672\H,3.2675057168,-0.3262980806,-3.4492183995\C,-2.6907619144,  
-3.2770792677,1.1201243745\H,-3.0327518134,-4.2912463804,0.8423539975\  
H,-1.755153019,-3.059883808,0.5782343905\H,-2.4741191077,-3.2832640545  
,2.2035781806\H,-3.3644785223,-1.2438562147,1.1493211371\O,6.140462509  
7,-4.0774591849,-1.4368829312\C,6.9460722464,-5.1940099899,-1.03244626  
82\H,6.3678779546,-6.1358561697,-1.0559077296\H,7.7650573313,-5.248455  
1159,-1.7646448186\H,7.3624159464,-5.0346067287,-0.020624123\N,-3.7436  
117568,-0.4679227515,4.3496777324\O,-4.3206247979,0.3348964875,3.61102  
59239\O,-4.2459003347,-0.9683559621,5.3610393969\\Version=ES64L-G09Rev  
D.01\State=1-A\HF=-3495.6819366\RMSD=2.806e-09\RMSF=5.040e-06\Dipole=4  
.5568388,-3.3973749,4.3696644\Quadrupole=-2.5637911,19.707555,-17.1437  
639,-31.8132689,22.6690837,-21.1379449\PG=C01 [X(C65H71N2O7P1)]\@

E-3c/1c (Type I; conf2)

1\1\GINC-WORKER1\FOpt\RTPSSTPSS\def2SVP/W06\C65H71N2O7P1\JHIOE\01-Apr-  
2016\0\#p tpsstps/def2svp/w06 densityfit empiricaldispersion=gd3 opt  
scrf=(smd,solvent=ch2cl2,read)\title\0,1\P,0.192942168,-0.615821740  
8,-1.186007792\O,-1.2232426278,0.0492693719,-1.7742699986\O,0.73104589  
23,0.6640274017,-0.2071315144\O,1.0761629467,-0.8333536333,-2.37957817  
93\O,-0.0982665961,-1.6993251975,-0.1498937559\C,-1.6850715079,2.06993  
26594,-0.5735128972\C,-2.0755905601,0.792776748,-0.9850299241\C,-3.375  
9041953,0.2523677038,-0.7299087807\C,-4.2622285427,1.0211997279,0.0130  
960794\H,-5.2710660749,0.6421212692,0.2069872765\C,-3.8898529918,2.285  
8606178,0.5525990428\C,-2.5762006809,2.8160303074,0.2818960953\C,-2.20  
40476845,4.047116444,0.9035537558\H,-1.1965406509,4.4427450592,0.74499  
64895\C,-3.0939718874,4.7362700222,1.7142427265\H,-2.7821631864,5.6741  
93609,2.1869655742\C,-4.4027618411,4.2330338679,1.9435872037\H,-5.0977  
963713,4.7897780074,2.5815419625\C,-4.7864161945,3.0285192409,1.377460  
4164\H,-5.7799851044,2.6118708423,1.5732380289\C,-0.3747545597,2.63218  
78443,-1.0092720774\C,0.807844238,1.9306525534,-0.754672016\C,2.105274  
4047,2.4961675923,-0.9528102067\C,2.1812419238,3.7623751056,-1.5192480  
419\H,3.1614082543,4.2281464953,-1.6648496194\C,1.0173024389,4.4692077  
832,-1.9375535439\C,-0.2843364991,3.9008319859,-1.6883438885\C,-1.4317  
504741,4.6076933342,-2.1598913678\H,-2.4238119407,4.1703702625,-2.0154  
169281\C,-1.3032860748,5.825315582,-2.8117406166\H,-2.1980086074,6.344  
1462238,-3.1730685851\C,-0.0216878965,6.4013831739,-3.0228696758\H,0.0  
649074749,7.367147153,-3.5326177317\C,1.1143796707,5.7319543843,-2.596  
3849786\H,2.1100954724,6.1562068937,-2.7689066922\C,-2.4592888205,-0.3  
992845026,4.0811535717\C,-1.8812626671,-1.3665317162,4.9129078643\H,-2  
.4309429937,-1.7427240874,5.7780916612\C,-0.6106517496,-1.8481096575,4  
.5933606305\H,-0.1597461625,-2.6196581829,5.2233733972\C,0.0576552261,  
-1.386107822,3.4351663182\C,-0.5331677856,-0.3753183771,2.6417675038\H  
,-0.0068439,0.0320831197,1.7753737322\C,-1.7947811058,0.1257065502,2.9  
656106245\H,-2.2653337722,0.9025906906,2.3591308311\C,1.3673266744,-1.  
9749366691,3.0762466531\C,2.3361146825,-2.3287581332,4.1612498626\H,3.  
3747540317,-2.2610540003,3.7992044588\H,2.1647137055,-3.3628165559,4.5

136059633\H,2.1958392098,-1.6551022692,5.0200031984\N,1.6321347045,-2.1455462807,1.8014153751\H,0.8796525222,-1.8751769841,1.0680391697\C,2.7798879199,-2.720824098,1.1895354495\C,3.2076783504,-2.1580022097,-0.0349794785\H,2.718225091,-1.2707124826,-0.4424841714\C,4.2880522795,-2.7054047725,-0.7132444331\H,4.6395827273,-2.2619885506,-1.6474635444\C,4.9694402528,-3.8265405687,-0.1893271053\C,4.5278642136,-4.408699912,1.0182212059\H,5.0174675213,-5.2938021255,1.4309815943\C,3.4344756159,-3.8596508721,1.6973220112\H,3.0748430817,-4.3522624597,2.603173061\C,3.3420962574,1.7825026292,-0.4932444299\C,4.2546419064,1.2351132212,-1.4338213889\C,3.6305966672,1.7205149405,0.8987659766\C,5.4645797257,0.6837985856,-0.9673170767\C,4.85365231,1.1627665156,1.3121928105\C,5.7968586921,0.6590650288,0.3980509967\H,6.1717545182,0.2749531399,-1.6979901401\H,5.0971032836,1.1378590055,2.3805830377\C,-3.7685516744,-1.0763644847,-1.3007982352\C,-4.0123842668,-2.1862413327,-0.4481093244\C,-3.9206433472,-1.2200171874,-2.7098028477\C,-4.4237888354,-3.4064943072,-1.0194965729\C,-4.323799131,-2.4618899802,-3.2295297571\C,-4.5862427504,-3.5697709931,-2.4035177973\H,-4.6130488353,-4.2643190457,-0.3623357203\H,-4.4426670757,-2.564662629,-4.3147086507\C,-3.7018883309,-0.055001349,-3.6780470082\H,-3.3645513568,0.8174235685,-3.0943245658\C,-3.7994619057,-2.1177235138,1.0644685082\C,-5.0170957839,-4.911402059,-2.9894220231\H,-5.1840581818,-5.5969678089,-2.1372618858\C,-5.11895319,-2.2793012144,1.8454067139\H,-4.9356033811,-2.2229732823,2.9340714785\H,-5.8441378752,-1.4896976597,1.5802187769\H,-5.589579339,-3.2580035322,1.6369626033\C,-3.9080467244,-5.522331242,-3.8708311062\H,-3.6995960387,-4.8837085668,-4.7490693968\H,-2.9660886748,-5.6368860044,-3.3053626442\H,-4.2098830571,-6.5189736148,-4.2421122929\C,-6.3449135612,-4.7982128074,-3.7659566419\H,-6.6689402651,-5.790513958,-4.1299601519\H,-7.1474785813,-4.3888364196,-3.1265753301\H,-6.2412024888,-4.1361648466,-4.6453832024\C,-2.6014228266,-0.3637675649,-4.7133672633\H,-2.8871606268,-1.2060234115,-5.3700872832\H,-2.4261038255,0.5173022093,-5.3580259158\H,-1.6521866275,-0.6167205258,-4.2118107123\C,-5.0245269735,0.3491535619,-4.3628130062\H,-4.8687948105,1.2256450671,-5.0185761265\H,-5.4236959535,-0.4723250128,-4.985953533\H,-5.7941947326,0.6131353263,-3.6151568028\C,7.1358743213,0.1138982246,0.8937454348\H,7.2214984665,0.4045097906,1.9579438359\C,3.967986011,1.2617874363,-2.9367526569\H,2.9203170983,1.5830057905,-3.0659490457\C,2.678241855,2.3326032969,1.9292117386\H,1.6574393598,2.271675289,1.5152772093\C,7.1915832612,-1.4262980509,0.8317463735\H,8.1532141627,-1.7953722919,1.2344407003\H,6.3775187404,-1.879950463,1.4227857831\H,7.0978091701,-1.7894374153,-0.2066757592\C,8.3293526951,0.7369856949,0.1426669247\H,8.3420970934,0.4321605243,-0.9198360275\H,8.2955664077,1.8405864297,0.1792449462\H,9.2833612922,0.4078179652,0.5933765071\C,2.6606066572,1.5863844594,3.2746179433\H,2.5062838408,0.5039637761,3.1310003751\H,3.600730281,1.7242881431,3.8386426157\H,1.8388813266,1.96727708,3.9067140285\C,3.0004259736,3.828791347,2.1368485483\H,2.9520897034,4.3843238482,1.1838078718\H,2.2811260447,4.2891493344,2.8391533943\H,4.017022336,3.9541304505,2.5533019878\C,4.8722676843,2.2888703781,-3.649825357\H,4.7576034736,3.2980545403,-3.2162532192\H,5.9376673045,2.0043797052,-3.5641866269\H,4.6224494517,2.347775006,-4.7252802527\C,4.0894295534,-0.1300801103,-3.5866516304\H,3.839701241,-0.0649672089,-4.6618132911\H,5.115767152,-0.5334525117,-3.5105019674\H,3.3828389983,-0.8338928475,-3.1186432347\C,-2.7445318016,-3.1433101546,1.5270713285\H,-3.091239412,-4.1814853972,1.3705650313\H,-1.8005213,-2.9997943099,0.9750104827\H,-2.540798931,-3.0183595791,2.6058138143\H,-3.4019154736,-1.1176272562,1.2970104348\O,6.0356806757,-4.253750821,-0.9047024265\C,6.8433451107,-5.3190895417,-0.3842821439\H,6.2663305024,-6.2588878081,-0.3059999117\H,7.6610551811,-5.45025684

28,-1.1080827291\H,7.2623060774,-5.0516068189,0.6032480087\N,-3.838205  
6764,0.0507055637,4.3691040259\O,-4.3944292899,0.7670842185,3.53197835  
3\O,-4.3644605693,-0.3296022159,5.4198632185\Version=ES64L-G09RevD.01  
\State=1-A\HF=-3495.6812138\RMSD=5.768e-09\RMSF=2.588e-06\Dipole=4.456  
5478,-2.7185769,4.7986461\Quadrupole=-3.9707089,13.6104249,-9.6397159,  
-27.2892035,26.5536475,-25.7855834\PG=C01 [X(C65H71N2O7P1)]\@

E-3c/1c (Type II; conf0)

1\1\GINC-WORKER1\FOpt\RTPSSTPSS\def2SVP/W06\C65H71N2O7P1\JHIOE\04-Apr-  
2016\0\#p tpsstps/def2svp/w06 densityfit empiricaldispersion=gd3 opt  
scrf=(smd,solvent=ch2cl2,read)\title\0,1\P,0.1677176032,0.703785279  
3,-0.9621128489\O,1.6120181738,0.0911891549,-1.5497849781\O,-0.4511938  
625,-0.674359175,-0.1946795025\O,-0.6210670541,1.1264651785,-2.1647376  
977\O,0.424352868,1.6357705374,0.2247228891\C,2.0117077956,-2.00987374  
19,-0.4797257903\C,2.4206328106,-0.7052051763,-0.7672727353\C,3.690757  
6437,-0.1789491916,-0.3708110841\C,4.5124504005,-0.9886223874,0.402784  
1347\H,5.4980063253,-0.619780443,0.7060184858\C,4.0991856144,-2.280109  
2776,0.8399791077\C,2.8262675091,-2.8027754506,0.4068481217\C,2.408737  
6913,-4.0709991521,0.9121134182\H,1.4315156636,-4.4660500877,0.6199765  
898\C,3.2121831577,-4.7948645747,1.7811192646\H,2.8639333551,-5.760064  
0172,2.1649136287\C,4.4789424961,-4.2922458292,2.1826550623\H,5.106319  
8467,-4.8757520867,2.8652106009\C,4.910063404,-3.0584674191,1.72025173  
22\H,5.8778337847,-2.652516644,2.0357394627\C,0.754938701,-2.543428705  
, -1.0807368962\C,-0.4566868225,-1.8766463034,-0.876005563\C,-1.7195168  
289,-2.4283565565,-1.2594074154\C,-1.7195848209,-3.6240359702,-1.96511  
16468\H,-2.6734235609,-4.0815021458,-2.2483193832\C,-0.5085065745,-4.2  
793070131,-2.3317826611\C,0.7523438796,-3.7405016792,-1.8846002209\C,1  
.951960226,-4.3985037126,-2.2930422357\H,2.9177818861,-3.9809119027,-1  
.9943165589\C,1.9088879517,-5.5433663846,-3.0752673096\H,2.8433331192,  
-6.0248644317,-3.3837764034\C,0.6644810649,-6.0911707863,-3.4871560445  
\H,0.6439432769,-6.9985212961,-4.1006317867\C,-0.5184075885,-5.4674134  
14,-3.1231342539\H,-1.4846670954,-5.8706705862,-3.4469912681\C,-4.8453  
142349,3.0484229273,0.0750587686\C,-5.2756505974,2.7359586672,1.368955  
4523\H,-6.3312646721,2.8185850146,1.6333989987\C,-4.332849864,2.293722  
1575,2.2971074655\H,-4.6777569941,2.0380066805,3.3002651649\C,-2.96696  
37148,2.1578662918,1.9427328052\C,-2.5612887169,2.5573604935,0.6437600  
476\H,-1.509946627,2.5217493806,0.3460283937\C,-3.4952557945,2.9944504  
364,-0.2933114582\H,-3.1896545477,3.2760891451,-1.3020701653\C,-2.0156  
171754,1.5964584272,2.9262458811\C,-2.4902027126,1.2445048679,4.303208  
938\H,-1.7781577607,0.5844245192,4.8173450164\H,-3.4638696431,0.734161  
2368,4.2407272178\H,-2.6324881914,2.1563084377,4.9108798807\N,-0.77123  
70007,1.358293752,2.566129509\H,-0.4439351768,1.4841881791,1.547325730  
7\C,0.3055828972,0.8977635487,3.3747518277\C,1.1479298989,-0.093399991  
9,2.8360014079\H,0.9228236414,-0.5223499834,1.8561166809\C,2.270143908  
, -0.5277119242,3.5447075702\H,2.9059356867,-1.2990731385,3.1057118747\  
C,2.5825555048,0.0576562471,4.7910776314\C,1.7348576676,1.0547658387,5  
.3288143838\H,1.9997207006,1.5102194515,6.2876208299\C,0.6057062433,1.  
4716176144,4.6297089142\H,-0.0118627711,2.2787192773,5.0319513795\C,-3  
.0026725106,-1.7982542792,-0.8000084221\C,-3.7647417202,-0.9612360647,  
-1.6595327151\C,-3.4748451766,-2.09373666,0.5055336998\C,-4.9930628534  
, -0.4588056024,-1.1963686714\C,-4.715406324,-1.5697402208,0.9213609199  
\C,-5.5001728388,-0.7632092632,0.0818650415\H,-5.588740422,0.182777667  
1,-1.8567331804\H,-5.0731152565,-1.8125924717,1.9272628783\C,4.1260729  
69,1.1841980191,-0.8154837021\C,4.3084078683,2.2253880211,0.1347658682  
\C,4.3908172895,1.4288622051,-2.1930978927\C,4.7828550633,3.475694857,  
-0.3075422839\C,4.8528844047,2.6973693791,-2.5833929456\C,5.0665948933



.3.7344884683,-1.6573819518\H,4.9309443097,4.2784916458,0.4254391462\H  
.5.063496143,2.8774116718,-3.6442397956\C,4.2285345086,0.3457896239,-3  
.262383537\H,3.8538459296,-0.5672107239,-2.7711659847\C,3.9745371354,2  
.0398275589,1.6148038102\C,5.5961167267,5.0951346869,-2.101767612\H,5.  
6666170437,5.726835394,-1.1963038906\C,5.2382957945,2.0545296726,2.497  
7925819\H,4.9740180852,1.8589137426,3.553328671\H,5.9622366207,1.28482  
93,2.1761631459\H,5.7463061376,3.0357153152,2.4521879189\C,4.633503522  
8,5.7921081473,-3.0848617357\H,4.5308185614,5.2136116404,-4.0213651938  
\H,3.6268254175,5.9065146858,-2.6446688042\H,5.0089739408,6.7977345808  
, -3.3494894426\C,7.0124783759,4.9776478679,-2.7021974862\H,7.407502553  
1,5.9747710917,-2.9702901734\H,7.7125523365,4.5130474873,-1.9847167663  
\H,7.0070543339,4.3590980479,-3.6186687279\C,3.191262712,0.7480159604,  
-4.3304347119\H,3.5234663745,1.6334425546,-4.9037907271\H,3.0403228241  
, -0.0786922768,-5.0489504732\H,2.2192958712,0.9775493413,-3.8627797178  
\C,5.5856894191,-0.0157816124,-3.9015620099\H,5.4642291625,-0.84332500  
76,-4.6246477599\H,6.0189185089,0.8448177763,-4.4436499932\H,6.3144143  
871,-0.3361082251,-3.1349463081\C,-6.8894418394,-0.2583852457,0.472545  
2585\H,-6.9524320212,0.7952631687,0.1391740814\C,-3.3060492464,-0.6636  
529185,-3.0879574364\H,-2.2218505503,-0.8663436352,-3.1313007288\C,-2.  
6755441831,-2.9714866967,1.4715757519\H,-1.7944222766,-3.3532814447,0.  
9285776045\C,-7.9756317568,-1.040126651,-0.302113105\H,-8.9813106581,-  
0.6409531968,-0.0749775624\H,-7.819169817,-0.970625992,-1.3929931699\H  
, -7.9589788268,-2.1101461384,-0.0236961989\C,-7.1764051822,-0.29694309  
1,1.9814191399\H,-7.2485374818,-1.3354013822,2.3538503258\H,-6.3925507  
105,0.2179088388,2.5637945609\H,-8.1402432589,0.198048281,2.1962921076  
\C,-2.1525956664,-2.1471990259,2.665861863\H,-1.5603175644,-1.28848961  
35,2.3115450883\H,-2.9853632327,-1.7631517544,3.282919877\H,-1.5059663  
349,-2.7647006166,3.3159770038\C,-3.4825746021,-4.198192741,1.94015930  
72\H,-3.8326603956,-4.795824365,1.079305275\H,-2.8579061023,-4.8500122  
158,2.5780933223\H,-4.3686595518,-3.9026596668,2.5316481376\C,-4.01681  
07808,-1.6097391402,-4.0802625914\H,-3.8386463321,-2.6698299038,-3.828  
2022717\H,-5.1098078232,-1.439576121,-4.0675441594\H,-3.6560473857,-1.  
4376134283,-5.1112087307\C,-3.5003215923,0.8081917403,-3.4942308084\H,  
-3.1253683134,0.9646827287,-4.5223587248\H,-4.5626877335,1.1123496516,  
-3.480936574\H,-2.9249508454,1.4649316244,-2.8246059317\C,2.9405255673  
,3.0759287727,2.0993988542\H,3.338864641,4.106172192,2.0512846698\H,2.  
0258124332,3.0204448361,1.4859301314\H,2.6658534198,2.8724234601,3.149  
9037027\H,3.506920736,1.0492851024,1.7255523097\O,3.6755957539,-0.2536  
61614,5.5258321536\C,4.6006198738,-1.2230675247,5.0088680967\H,5.40528  
87117,-1.2915043537,5.7554042474\H,4.1188939622,-2.2105458498,4.890820  
9577\H,5.0199293863,-0.8934234485,4.0415143366\N,-5.8503362869,3.41663  
48046,-0.9442867422\O,-5.4458531962,3.7631398661,-2.0572889574\O,-7.04  
39196915,3.3424549123,-0.6304301184\Version=ES64L-G09RevD.01\State=1-  
A\HF=-3495.6839068\RMSD=4.145e-09\RMSF=2.384e-06\Dipole=0.5754518,-1.1  
987844,6.7361849\Quadrupole=-4.9492799,-6.0147601,10.9640401,-2.080488  
6,-17.7547312,16.8029621\PG=C01 [X(C65H71N2O7P1)]\@

E-3c/1c (Type II; conf1)

1\1\GINC-WORKER1\FOpt\RTPSSTPSS\def2SVP/W06\C65H71N2O7P1\JHIOE\04-Apr-  
2016\0\#p tpsstps/def2svp/w06 densityfit empiricaldispersion=gd3 opt  
scrf=(smd,solvent=ch2cl2,read)\title\0,1\P,-0.1604094477,-0.5713463  
553,-1.0512235922\O,-1.5828108702,0.1078436734,-1.6195436557\O,0.44355  
84916,0.7241438985,-0.1411377515\O,0.6626386369,-0.8857058607,-2.26404  
0513\O,-0.461664842,-1.6084394527,0.0335575398\C,-1.9905283306,2.11193  
11948,-0.3800324099\C,-2.404737292,0.8428255916,-0.7923544137\C,-3.690  
2477346,0.299503347,-0.477698035\C,-4.5252171994,1.0483738012,0.341521

3265\H,-5.5220131914,0.6664328528,0.585626833\C,-4.111477782,2.2919117  
889,0.9007526615\C,-2.8210157606,2.8341501623,0.5509899047\C,-2.403650  
7459,4.0472935757,1.176882983\H,-1.4139267736,4.4521794485,0.946111269  
9\C,-3.2239791548,4.7038332171,2.0827046498\H,-2.8767192049,5.62694319  
32,2.5595988962\C,-4.5079804604,4.1858704134,2.4016463413\H,-5.1490448  
882,4.7171112845,3.1134835378\C,-4.9392853656,3.0029514832,1.821598505  
2\H,-5.9210140138,2.5856130156,2.0721253547\C,-0.7119211494,2.67927077  
61,-0.8972373856\C,0.48485123,1.9790796849,-0.7196252526\C,1.764356187  
4,2.5388747165,-1.02675403\C,1.7990047406,3.7934091519,-1.6208426597\H  
,2.7661379299,4.2578858137,-1.8400452687\C,0.6070965222,4.4999256859,-  
1.9540582502\C,-0.67247194,3.9412556581,-1.592819186\C,-1.852133383,4.  
6495052454,-1.9736954941\H,-2.8305992295,4.2200052172,-1.7404347413\C,  
-1.7732539522,5.8581020558,-2.650000117\H,-2.692741922,6.3778510721,-  
2.9409942709\C,-0.5111486783,6.4232191097,-2.9757651109\H,-0.462805284  
1,7.3811120327,-3.5050727687\C,0.6536227989,5.7530998988,-2.6364015186  
\H,1.6332316469,6.1698174587,-2.8968746668\C,4.7630734937,-3.126929008  
, -0.1721256059\C,5.180056359,-2.9611545373,1.1530330837\H,6.2301751432  
, -3.092240058,1.4199415296\C,4.2327194174,-2.5969389707,2.110220707\H  
,4.5670123343,-2.4522812681,3.1387781525\C,2.8756984202,-2.3925660959,  
1.7535998176\C,2.480934717,-2.6515486704,0.4160148205\H,1.4356333749,-  
2.560232126,0.1089554109\C,3.4196426047,-3.0095160788,-0.5494149055\H,  
3.1230458062,-3.1792589603,-1.5855993232\C,1.9230823746,-1.8992448195,  
2.7718392501\C,2.3803533041,-1.6935911627,4.1838847462\H,1.6789073662,  
-1.0612450349,4.7453594564\H,3.3699449974,-1.2104668889,4.1865992264\H  
,2.4824693179,-2.6625808747,4.7049356327\N,0.6931293003,-1.5902303449,  
2.4145905817\H,0.3846509097,-1.609346024,1.3829422925\C,-0.3897523329,  
-1.1742261916,3.2383184014\C,-1.2003641768,-0.1258817241,2.7619412269\  
H,-0.944732174,0.3739544283,1.8241191252\C,-2.3317809715,0.2734932766,  
3.4756638182\H,-2.9420535644,1.0884995626,3.0817852838\C,-2.6869645705  
, -0.4040168784,4.6625423816\C,-1.8708834281,-1.4575551682,5.1383744279  
\H,-2.1691164953,-1.9833293004,6.0502155168\C,-0.731761444,-1.84038150  
5,4.4357708058\H,-0.1416135611,-2.6909118895,4.7862535665\C,3.02624185  
33,1.842844175,-0.6050210831\C,3.7974755798,1.0862122264,-1.5289153256  
\C,3.4678578658,1.9909332617,0.7353228295\C,5.0063813511,0.5183258455,  
-1.0907049567\C,4.6906884773,1.4080144382,1.1237507659\C,5.484076338,0  
.6786415509,0.224310848\H,5.6098279034,-0.0620667685,-1.7987889654\H,5  
.0255077787,1.5396753709,2.1579046757\C,-4.1207764619,-1.0154743191,-1  
.053328725\C,-4.317819415,-2.1414762379,-0.2057036377\C,-4.3564505034,  
-1.1313684104,-2.450976601\C,-4.7729708322,-3.3471291364,-0.7687297754  
\C,-4.8031867208,-2.3633493393,-2.96483402\C,-5.0224846478,-3.48254517  
28,-2.1456328994\H,-4.9254065429,-4.210473842,-0.1104691457\H,-4.99216  
58328,-2.4548790115,-4.0416006158\C,-4.1766874231,0.0465951198,-3.4116  
22738\H,-3.82407382,0.9128574827,-2.8271561419\C,-4.0185664461,-2.0878  
368841,1.2926897888\C,-5.4987850967,-4.8057847181,-2.7386711595\H,-5.6  
387812291,-4.6423303792,-3.8238629875\C,-5.3057737287,-2.1449962009,2.  
13964352\H,-5.0674499536,-2.0317437328,3.2133354487\H,-6.0086090198,-1  
.3411547611,1.857106668\H,-5.8284727215,-3.1107008078,2.0080901459\C,-  
6.8564754168,-5.2417933609,-2.1515638626\H,-6.7772723099,-5.4428401723  
, -1.0672039152\H,-7.6248935235,-4.4614226869,-2.2971855359\H,-7.211528  
9631,-6.1678870599,-2.6397638331\C,-4.4394356486,-5.9142649134,-2.5653  
420528\H,-4.7733264667,-6.8512841509,-3.0478959466\H,-3.4752677429,-5.  
6200228839,-3.0169744219\H,-4.261041703,-6.1302716087,-1.4956835886\C,  
-3.1086366476,-0.2458661768,-4.4855276258\H,-3.4137635757,-1.081216733  
8,-5.1425019039\H,-2.9559981937,0.6431922755,-5.1248514775\H,-2.143174  
0928,-0.5022308462,-4.018132878\C,-5.5203831056,0.4562149258,-4.050150  
027\H,-5.3867417424,1.3444081099,-4.6949921294\H,-5.9347583068,-0.3550

336599,-4.6765560739\H,-6.2695277613,0.7052755877,-3.2768164408\C,6.85  
29572344,0.1087410014,0.5955982038\H,6.9090839013,-0.9019136641,0.1480  
233378\C,3.3695484412,0.9412197603,-2.9902923974\H,2.2883859504,1.1579  
046617,-3.0352217645\C,2.6570381927,2.7727155473,1.7711267431\H,1.7691  
256619,3.1864100646,1.2638995883\C,7.9747862112,0.9523589298,-0.052692  
5721\H,8.9665072989,0.5105269778,0.1559231663\H,7.8506765167,1.0121026  
888,-1.1483457119\H,7.9668029744,1.9835354679,0.3467214669\C,7.0902749  
451,-0.0276260373,2.1069756698\H,7.1736938104,0.9607952246,2.595072445  
6\H,6.2730833138,-0.5803684495,2.60143711\H,8.0337138067,-0.5701041266  
,2.296191098\C,2.1463629924,1.8455835608,2.8924887691\H,1.5692306477,1  
.0096487746,2.4660859447\H,2.9828373718,1.425057217,3.4801123629\H,1.4  
875727483,2.3975710474,3.5877454077\C,3.4504196363,3.9668941409,2.3375  
847765\H,3.786287097,4.6396270367,1.5279354794\H,2.8227722582,4.554572  
6818,3.0325682331\H,4.3446882906,3.6335136525,2.8959344541\C,4.1084321  
331,1.975490122,-3.8673498454\H,3.92739468,3.0069787752,-3.5178058671\  
H,5.2001739403,1.7983274228,-3.8457514619\H,3.7718037267,1.9068828327,  
-4.9183026739\C,3.5610913024,-0.4835555446,-3.540037987\H,3.1891594404  
,-0.5366239732,-4.5797302251\H,4.6224340583,-0.7909387111,-3.553811020  
5\H,2.9828675316,-1.2023184928,-2.9402800136\C,-3.0197237066,-3.183570  
7635,1.7156938569\H,-3.4353869682,-4.1975022657,1.5689170461\H,-2.0868  
079039,-3.0947002753,1.134367885\H,-2.7726102677,-3.075912578,2.786925  
8515\H,-3.5328634268,-1.120820335,1.497110759\O,-3.7932520651,-0.13295  
42397,5.3929945513\C,-4.6880186824,0.8933601133,4.9355713765\H,-5.5041  
075756,0.9234916448,5.6721928357\H,-4.1834119028,1.8757639556,4.901007  
6176\H,-5.0959125874,0.6464723311,3.9392708844\N,5.7762115427,-3.40532  
394,-1.2116367312\O,5.3821981561,-3.619178728,-2.3611876312\O,6.965975  
2812,-3.3933513607,-0.8756103832\Version=ES64L-G09RevD.01\State=1-A\H  
F=-3495.6837027\RMSE=4.990e-09\RMSEF=6.207e-06\Dipole=-0.6965696,0.5164  
32,6.7945048\Quadrupole=-5.7829709,-1.9456264,7.7285972,-3.8233246,17.  
0034981,-18.4206563\PG=C01 [X(C65H71N2O7P1)]\@

E-3c/1c (Type II; conf2)

1\1\GINC-LOGIN\FOpt\RTSPSS\def2SVP\W06\C65H71N2O7P1\JHIOE\05-Apr-20  
16\0\#p tpsstps/def2svp/w06 densityfit empiricaldispersion=gd3 opt s  
crf=(smd,solvent=ch2cl2,read)\title\0,1\P,-0.1296884434,-0.803719544  
1,-0.8307236181\O,-1.5224800815,-0.2747787618,-1.5981728638\O,0.452560  
5936,0.6739754007,-0.2329996875\O,0.7425459648,-1.3984420274,-1.894867  
671\O,-0.5008971974,-1.5411180635,0.4581916754\C,-2.0041123279,1.92464  
04677,-0.7979627166\C,-2.378530058,0.5864256844,-0.9416647179\C,-3.642  
3214109,0.0762768525,-0.5071491353\C,-4.5103478625,0.9583120884,0.1235  
165317\H,-5.4957582682,0.6062737019,0.445017679\C,-4.1433158884,2.3056  
170877,0.4020815582\C,-2.8637117932,2.8014792637,-0.0426595767\C,-2.48  
76439732,4.1285416112,0.325668774\H,-1.5048707497,4.5058554348,0.02780  
06289\C,-3.3395665917,4.9324516135,1.0694480155\H,-3.0243033974,5.9431  
809496,1.3510280462\C,-4.6152319874,4.4548425574,1.4748317764\H,-5.280  
7764664,5.1021629161,2.0561724984\C,-5.0051853011,3.1658639961,1.14722  
70889\H,-5.9775305549,2.7776799964,1.4703821034\C,-0.7276984485,2.4016  
847781,-1.4020864808\C,0.477549734,1.7783044549,-1.0622134814\C,1.7512  
999003,2.2957635968,-1.4550075054\C,1.7745303363,3.3973466306,-2.30038  
4569\H,2.7377626128,3.828778722,-2.5929486397\C,0.577700347,3.99716800  
03,-2.7882665559\C,-0.6978828565,3.4973694676,-2.3376657057\C,-1.88267  
44499,4.0967525254,-2.8632444604\H,-2.8582252096,3.7063824812,-2.55897  
4654\C,-1.8125546998,5.1491725989,-3.7641577419\H,-2.7354812733,5.5867  
684949,-4.1604912414\C,-0.5546111808,5.6597447696,-4.1833841559\H,-0.5  
132682908,6.4946947253,-4.8913156642\C,0.6150099925,5.0887569425,-3.70  
71868359\H,1.5917279181,5.4630885417,-4.0344259549\C,4.5058420236,-3.1

733433246,0.327316473\C,5.0714269525,-2.4735685929,1.3996369331\H,6.15  
56761783,-2.4066733594,1.5017934725\C,4.2223821245,-1.8464043567,2.312  
1742599\H,4.670684695,-1.2711814427,3.1245581678\C,2.8147394315,-1.920  
5700948,2.1653852341\C,2.2826270585,-2.6968882337,1.1047124345\H,1.203  
3984458,-2.8089294862,0.9791990629\C,3.1207994695,-3.3075876359,0.1743  
352543\H,2.7110726588,-3.8762964568,-0.6621484836\C,1.9292295467,-1.18  
79362506,3.0974900082\C,2.4618466249,-0.665542894,4.3947164432\H,1.796  
4941189,0.0919693682,4.8314782597\H,3.4550207061,-0.2173817187,4.23730  
41674\H,2.5869286049,-1.4929847184,5.1168662604\N,0.6808253743,-0.9721  
372996,2.7390717925\H,0.3369208992,-1.2322609869,1.7470249673\C,-0.368  
1856914,-0.3604548017,3.4783088583\C,-1.2063953568,0.5330164557,2.7829  
585124\H,-0.9919038633,0.7747159376,1.7385901891\C,-2.3114056995,1.104  
5365453,3.4160441932\H,-2.9443217088,1.7949932857,2.8551158056\C,-2.61  
16617816,0.7552066255,4.750864891\C,-1.7669420807,-0.1415379473,5.4475  
299506\H,-2.021387534,-0.4126516819,6.4764523513\C,-0.6533833543,-0.69  
42366175,4.8204459637\H,-0.0372437617,-1.4232110613,5.3530394925\C,3.0  
260547203,1.7633534775,-0.8674518298\C,3.862835005,0.8813731516,-1.594  
4158231\C,3.4284277002,2.2274569492,0.4158384168\C,5.120214888,0.53618  
31471,-1.0576774782\C,4.6766392594,1.8280917539,0.9221494342\C,5.55829  
26981,1.0088570957,0.1901167104\H,5.7681746227,-0.1234935862,-1.641388  
228\H,4.9831654703,2.1856394518,1.9130058816\C,-4.0170225487,-1.354447  
1125,-0.7458573535\C,-4.1547650984,-2.2492767391,0.3507587381\C,-4.260  
2486715,-1.8128582246,-2.0707401023\C,-4.5659224939,-3.5723929672,0.09  
91083615\C,-4.662108874,-3.1455446974,-2.2677261721\C,-4.8286984854,-4  
.0424397109,-1.1975440928\H,-4.6790721126,-4.2645330652,0.9423315999\H  
, -4.855454693,-3.4916466481,-3.2899382212\C,-4.1223123361,-0.896575830  
1,-3.2884113226\H,-3.7985457614,0.0966086323,-2.9338251027\C,-3.855013  
9858,-1.818245471,1.7876102206\C,-5.2740757928,-5.4830357501,-1.433508  
4791\H,-5.3420720538,-5.9671606776,-0.4411127135\C,-5.1462657189,-1.62  
25058178,2.6090070973\H,-4.9069148287,-1.2517454237,3.6230587705\H,-5.  
8255823428,-0.895638643,2.1303885186\H,-5.6958320479,-2.5762653022,2.7  
168258611\C,-4.2387233518,-6.2658227157,-2.2671395884\H,-4.1326377509,  
-5.8330055707,-3.2790430905\H,-3.2446715926,-6.2496369884,-1.785753737  
4\H,-4.5477741472,-7.3211057847,-2.3823392863\C,-6.6720515185,-5.54759  
56815,-2.0827101229\H,-7.009032786,-6.5960424455,-2.1796841041\H,-7.41  
85398135,-5.0018359786,-1.4781144815\H,-6.6642997382,-5.1026843443,-3.  
094827606\C,-3.0438903795,-1.4088924907,-4.2653515389\H,-3.3300626927,  
-2.3805965057,-4.7088317332\H,-2.9055089915,-0.6906703346,-5.094559199  
7\H,-2.0761484683,-1.5304988141,-3.7509276558\C,-5.4783188812,-0.69950  
42927,-3.9977984234\H,-5.3752287084,0.0090675583,-4.8402074436\H,-5.86  
36607737,-1.65240229,-4.4052174181\H,-6.2364165021,-0.2966052894,-3.30  
21455216\C,6.9417835856,0.6893834973,0.7632080179\H,6.7754017663,0.227  
1584414,1.757719244\C,3.4444099977,0.3291644953,-2.9578421032\H,2.3504  
422966,0.4534931604,-3.0361903984\C,2.5521098209,3.1740476263,1.239758  
1679\H,1.6314908137,3.3662292598,0.6638760387\C,7.7645407526,-0.295403  
0321,-0.0815829938\H,8.7101272279,-0.5353790319,0.436574295\H,7.234280  
5163,-1.2447506399,-0.2652951303\H,8.0263887739,0.1419747501,-1.062831  
8709\C,7.7499383173,1.9871960855,0.9910021013\H,7.9385819112,2.4990698  
555,0.029048426\H,7.2180725646,2.6935023616,1.6519013878\H,8.726967725  
5,1.7592090282,1.4549480042\C,2.1230814455,2.5349194518,2.5742206301\H  
,1.6047211409,1.5802968482,2.3927565152\H,2.9913009084,2.3395888338,3.  
229388117\H,1.4304079336,3.20085832,3.120640164\C,3.2411676883,4.53607  
80574,1.4577695621\H,3.5121489198,5.0030867357,0.4938090204\H,2.568448  
981,5.2284339607,1.9967431389\H,4.1654520337,4.4299447719,2.052891075  
\C,4.1050359009,1.1248637253,-4.1032637447\H,3.8480924339,2.1974607581  
, -4.0505289773\H,5.2069500343,1.0375272289,-4.0588468592\H,3.772698956

5,0.7423218689,-5.0860832251\C,3.7303765763,-1.1789008357,-3.092302227  
9\H,3.3254202454,-1.5557794452,-4.0490730632\H,4.8129711593,-1.4010769  
816,-3.0813214105\H,3.2403517677,-1.7367134582,-2.2797466013\C,-2.8938  
119643,-2.7872129522,2.5034427261\H,-3.3442394886,-3.787126188,2.64332  
79771\H,-1.9589941978,-2.8953581721,1.9295663602\H,-2.6424907593,-2.39  
38498942,3.5048488082\H,-3.3428630781,-0.8446594355,1.735044795\O,-3.6  
891415531,1.2082566157,5.4326333931\C,-4.606089218,2.0899450066,4.7657  
942614\H,-5.3968556997,2.3045466568,5.4995000151\H,-4.1092621426,3.031  
6172856,4.4698140423\H,-5.0474107096,1.6046766531,3.8767879735\N,5.396  
719159,-3.7739452053,-0.6882299069\O,4.8746050961,-4.3087037191,-1.670  
0956982\O,6.6168491,-3.7003560751,-0.5043299471\\Version=ES64L-G09RevD  
.01\State=1-A\HF=-3495.6827414\RMSD=6.099e-09\RMSF=2.412e-06\Dipole=-0  
.6253307,2.2041393,6.5177774\Quadrupole=-2.5482126,-10.9266765,13.4748  
892,1.9691621,17.8589008,-13.5038996\PG=C01 [X(C65H71N2O7P1)]\@

- [1] J. Siegel, F. Anet, *J. Org. Chem.* **1988**, *9*, 2629–2630.
- [2] I. G. Shenderovich, A. P. Burtsev, G. S. Denisov, N. S. Golubev, H.-H. Limbach, *Magn. Reson. Chem.* **2001**, *39*, 91–99.
- [3] M. Klussmann, L. Ratjen, S. Hoffmann, V. Wakchaure, R. Goddard, B. List, *Synlett* **2010**, *2010*, 2189–2192.
- [4] M. Rueping, E. Sugiono, C. Azap, T. Theissmann, *Org. Lett.* **2005**, *7*, 3781–3783.
- [5] S. Hoffmann, A. M. Seayad, B. List, *Angew. Chemie Int. Ed.* **2005**, *44*, 7424–7427.
- [6] R. K. Harris, E. D. Becker, S. M. Cabral de Menezes, R. Goodfellow, P. Granger, *Magn. Reson. Chem.* **2002**, *40*, 489–505.
